# Supplementary material for: Regulatory roles of 5′ UTR and ORF-internal RNAs detected by 3′ end mapping
Source: bioRxiv preprint, doi:10.1101/2020.07.18.207399, version 2 (2020-11-25)
Supplement: Supplementary file 1 [file 207399_file04.xlsx]

## Sheet: LB 0.4
Supplementary file 1. 3´ ends identified by Term-seq
3´ end position	strand	Term-seq AVG read count	classification	details	3′ end region
256	+	4852.32	primary,	P:gene_id "EG11277"; gene_name "thrL";	CCACCATTACCACCACCATCACCATTACCACAGGTAACGGTGCGGGCTGACGCGTACAGGA
9230	+	16185.7	primary,	P:gene_id "EG11556"; gene_name "talB";	GATCTGCTGTAATCATTCTTAGCGTGACCGGGAAGTCGGTCACGCTACCTCTTCTGAAGCC
9920	+	1107.03	primary, antisense,	P:gene_id "EG11511"; gene_name "mog";,A:gene_id "EG11512"; gene_name "satP";	GCAAGACGCGACGTTAGCGAATAAAAAAATCCCCCCGAGCGGGGGGATCTCAAAACAATTA
10394	-	23469	internal,	I:gene_id "EG11512"; gene_name "satP";	CGGCATGACCACCATTCTGCTTAACCTGCACAACGTGGGTTATTTCGCTCTGGACGGTATT
14145	+	1862.05	internal,	I:gene_id "G0-8893"; gene_name "tpke11";	GTAATTATACTGACACGGGCGAAGGGGAATTTCCTCTCCGCCCGTGCATTCATCTAGGGGC
17007	+	66697.6	primary, antisense,	P:gene_id "G0-9581"; gene_name "sokC";,A:gene_id "EG10373"; gene_name "mokC";	GCATATAGGAGGCCTCGGGTTGATGGTAAAATATCACTCGGGGCTTTTCTCTATCTGCCGT
17501	+	4843.85	internal,	I:gene_id "EG10652"; gene_name "nhaA";	AGTAAAAACGATCTATTCACCTGAAAGAGAAATAAAAAGTGAAACATCTGCATCGATTCTT
18696	+	933.144	primary,	P:gene_id "EG10652"; gene_name "nhaA";	ATCAGTTTGACAGGACGGTTTACCGGGGAGCCATAAACGGCTCCCTTTTCATTGTTATCAG
20763	-	304673	orphan		CGCCAATTTGCTGAAGCTTTGTGAAAAAGCCCGCGCAAGCGGGTTTTTTTATGCCTGCTGC
21040	-	27479.3	internal,	I:gene_id "EG10919"; gene_name "rpsT";	GGGAGTTGGACCTTGGCTAATATCAAATCAGCTAAGAAGCGCGCCATTCAGTCTGAAAAGG
25325	+	1242.78	internal,	I:gene_id "EG10548"; gene_name "lspA";	TCTGGGCAGCAAATACCTGATCCTCCAGAACTTTGCTCTGGGGGATACGGTCCCGCTGTTC
25802	+	1009.49	orphan		CTGCGAAATCGTAGGCCGGATAAGGCGTTTACGCCGCATCCGGCAAAAATCCTTAAATATA
50365	+	848.319	antisense,	A:gene_id "EG10048"; gene_name "apaH";	TTTACGGCTAGCGCCGGATGCGACGCCGGTCGCGTCTTATCCGGCCTTCCTATATCAGGCT
51371	-	23751.4	internal,	I:gene_id "EG10047"; gene_name "apaG";	CCAGGGCGAAGGAGTGGTTGGCGTCCAGCCACTTATCGCGCCTGGCGAAGAGTACCAGTAC
54365	-	48660.8	internal,	I:gene_id "EG10985"; gene_name "surA";	GGATCAGGCGATTGCTAACATCGCGAAACAGAACAACATGACGCTGGATCAGATGCGCAGC
57344	+	2807.91	orphan		GGAAAACGGTAAAAGCACCTTTATATTGTGGGAGATAGCCCTGATATCCGTGTGTCGATTT
63352	-	23469	orphan		ATTTTGATGCGTGACGAATGCTTTGCCATCCAGTACCATAGCGCCCTTTCCATTCCTGGAC
75517	-	976436	internal,	I:gene_id "G0-9381"; gene_name "sroA";	TACCCGTCGAACCTGATCCGGATAACGCCGGCGAAGGGATTTGAGGCTCCTTCTCAAGTCC
77593	+	6222.31	primary,	P:gene_id "G0-9941"; gene_name "sgrS";	AGTATTGGTGTAAAATCACCCGCCAGCAGATTATACCTGCTGGTTTTTTTTATTCTCGCCG
83641	-	108195	internal,	I:gene_id "EG11280"; gene_name "leuL";	CTTTATCGGTCTACTACTACTAAACGCATCTTCTTTGCGCGGTAGACGAGTGAGCGGCATC
89783	+	1162.19	internal,	I:gene_id "EG11084"; gene_name "mraZ";	ATGGTTTGCACCATTGACATTTATCACCCGTGCCTGCTGCTTTACCCCCTGCCTGAATGGG
91164	+	1497.26	internal,	I:gene_id "EG11086"; gene_name "ftsL";	TCGGTGACGATCTTTTGCGATTTGGGAAGCTGCCACTCTGCCTGTTCATTTGCATTATTTT
92658	+	103354	internal,	I:gene_id "EG10341"; gene_name "ftsI";	GCTTATATCCTCAAAAACAACGGTGGTCTGACATAGAGAGGGCCACCTTCTCTTTCGGCTA
106673	+	7588.11	internal,	I:gene_id "EG10265"; gene_name "lpxC";	AAAGTCACCCTGACGTTACGCCCTGCGCCGGCCAACACCGGGGTCATCTATCGTCGCACCG
106817	+	1412.43	internal,	I:gene_id "EG10265"; gene_name "lpxC";	GATGTACGGATTTCAACCGTAGAGCACCTCAATGCTGCTCTCGCGGGCTTGGGCATCGATA
107551	+	1255.49	orphan		CGACTGGCAAATCTGGCACTCTCTCCGGCCAGGTGAACCAGTCGTTTTTTTTTGAATTTTA
107811	+	1471.83	internal,	I:gene_id "EG11087"; gene_name "secM";	TCTCTTATTAGGGATGGTTGCGGCGAGTTTAGGTTTGCCTGCGCTCAGCAACGCCGCCGAA
118766	+	1323.37	internal,	I:gene_id "EG10041"; gene_name "ampD";	ATATAAGGAGATCCTGCATGTTGTTAGAACAGGGGTGGCTGGTTGGCGCGCGCCGCGTTCC
122287	+	861.032	internal,	I:gene_id "EG11088"; gene_name "pdhR";	CCTCCTTGCGTGAGGCGATTCAACGTCTCGAAGCGAAGGGCTTGTTGCTTCGTCGCCAGGG
122941	+	7829.82	orphan		GTAAATCAAGCGCATATAAAAGCGCGGCAACTAAACGTAGAACCTGTCTTATTGAGCTTTC
126872	+	1030.68	internal,	I:gene_id "EG10025"; gene_name "aceF";	GGCAGCGACTGGCGGTGGTATCCCTGGCATGCTGCCGTGGCCGAAGGTGGACTTCAGCAAG
127845	+	1412.43	orphan		CCAGAATCCCCAGGAGCTTACATAAGTAAGTGACTGGGGTGAGGGCGTGAAGCTAACGCCG
131587	+	19638.3	orphan		CCCTACAAACTGCTGTCTCACAGGAGCGTGAAGAGAATCGCCTGCCGCACTATGACAATGA
134751	-	45215.2	primary, antisense,	P:gene_id "EG10962"; gene_name "speD";,A:gene_id "EG12605"; gene_name "yacL";	TGCCAGCTGTTTAACGGCTCTGGCGGAGCTCCCAGGCTCCGCCAGATTTATTTACTTCTGC
141973	-	281346	primary, antisense,	P:gene_id "EG12319"; gene_name "can";,A:gene_id "EG20098"; gene_name "hpt";	CGCCAACCACAAATAAAAATGCCATGCCGGATGCAACACATCCGGCAACTTCACACTTACT
142003	+	1247.02	primary, antisense,	P:gene_id "EG20098"; gene_name "hpt";,A:gene_id "EG12319"; gene_name "can";	CTGCTGGACGAGTAAGTGTGAAGTTGCCGGATGTGTTGCATCCGGCATGGCATTTTTATTT
146275	-	125366	primary, antisense,	P:gene_id "EG11747"; gene_name "panD";,A:gene_id "EG11749"; gene_name "yadE";	CAGGTTGCTTGATTGTTATCCCTGCGGCTGGTTACTCACCAGCCGCGACATCGTCTCCAGC
160097	-	3097035	internal,	I:gene_id "EG11362"; gene_name "gluQ";	TACAGCCGTTCCATCACGTTTACCACAGGCGGGAAATGCTCCCGCCTTATTTTTTGTTCAA
160387	-	29202.2	internal,	I:gene_id "EG10230"; gene_name "dksA";	TCGCACCGTTACACATATGCAGGATGAAGCAGCCAACTTCCCGGACCCGGTAGACCGTGCA
176994	+	4474.81	primary, antisense,	P:gene_id "EG12332"; gene_name "erpA";,A:gene_id "EG12333"; gene_name "yadS";	TTAGTATCTAATCTGTTGTTCATGTGCCGGATAAACTATCCGGCACATCTTCTCTCTTCAA
178423	-	45780.1	primary, internal,	P:gene_id "EG11090"; gene_name "mtn";,I:gene_id "EG12334"; gene_name "btuF";	GAAACTTGCACATGGCTAAGTCACTGTTCAGGGCGCTGGTCGCCCTGTCTTTTCTTGCGCC
178797	-	55241.2	internal,	I:gene_id "EG11090"; gene_name "mtn";	ACGGCATTTGGTTATGAATACGGTCAGTTACCAGGCTGTCCGGCAGGCTTTAAAGCTGACG
182347	+	1319.13	primary,	P:gene_id "EG10463"; gene_name "degP";	TTAATGCAGTAATCTCCCTCAACCCCTTCCTGAAAACGGGAAGGGGTTCTCCTTACAATCT
183649	-	70971.9	antisense,	A:gene_id "EG12335"; gene_name "cdaR";	GACGGTTAATTCGGGCATTCCCCTCTACCCTTCGGGCTGAGGGGAATGAGCCAGCGCCGCC
185087	-	242146	primary,	P:gene_id "EG10207"; gene_name "dapD";	CGTACCATCGACTAAAAGTATGCACACGGGCAGCACGACGCTGCCCGATTTTTTTGCAGGG
189839	+	12529.6	internal,	I:gene_id "G0-8895"; gene_name "tff";	GGCACATATTCCGGGGTGCCCTTTGGGGTCGGTAATATGGGATACGTGGAGGCATAACCCC
190800	+	17496.2	orphan		GACCAGGTAGTACACGTTTGGTTAGGGGGCCTGCATATGGCCCCCTTTTTCACTTTTATAT
194843	+	73361.3	orphan		TAAGTAGTTGGCTTTATAAGGTCAGATATGCCGTGGTTTTACACGGCTTTTTTTTGTATAG
196856	+	852.557	internal,	I:gene_id "EG12436"; gene_name "rseP";	TGCCTTCAATAATAAATCTGTCGGCCAACGAGCGGCGATTATTGCCGCAGGTCCGGTTGCA
197476	+	1734.78	internal,	I:gene_id "EG12436"; gene_name "rseP";	GTAATGGTAAAGCGATTGGTTTTGTCGGTATTGAGCCGAAAGTCATTCCTTTGCCAGATGA
198046	+	941.62	internal,	I:gene_id "G6093"; gene_name "bamA";	GTTCGTAGTGAAAGATATTCATTTCGAAGGCCTTCAGCGTGTCGCCGTTGGTGCGGCCCTC
200438	+	1234.3	orphan		AGTGTAGCGATGACTTTAGGCGATCAATATAAGATCGCCGGGCCACGCAAAGAACTGCACC
201053	+	4606.32	internal,	I:gene_id "EG10316"; gene_name "lpxD";	GCAGTTGGATGCAGAACTACACGGTGATGGCGATATCGTCATCACCGGCGTTGCGTCCATG
201623	+	1017.97	internal,	I:gene_id "EG10316"; gene_name "lpxD";	AATTATTGGCGATCGCGTGGAGATCGGTGCCTGCACAACCATCGATCGCGGCGCGCTGGAT
202063	+	2986.03	orphan		CGCCAAACTTTACGGCCTGTCTCATTCTTACGATTGCGGCAGGCCGTGTTATTATTGTCGT
202315	+	1331.85	internal,	I:gene_id "EG11284"; gene_name "fabZ";	CCCTGGAAAACCGATTTTCCCGGGTGTGCTGATTCTGGAAGCAATGGCACAGGCAACAGGT
203409	+	1959.59	internal,	I:gene_id "EG10546"; gene_name "lpxB";	GCGTCCATTAACGATTGCCCTGGTCGCCGGAGAAACCTCCGGCGATATCCTGGGGGCCGGT
208504	+	1174.9	internal,	I:gene_id "EG10238"; gene_name "dnaE";	CTGGGACAATTCCAGTACATCTCTACTATCAGAGGGCGGATGCACGCGCGCGGTTGCGTTT
213631	-	23469	primary, antisense,	P:gene_id "G6097"; gene_name "rof";,A:gene_id "G6096"; gene_name "tilS";	CTGATTGACTTTCGCCGGATGCGACGTTTGATGCGTCTTATCCGGCTTTCACTTAACTAAG
214055	-	69842.2	internal,	I:gene_id "G372"; gene_name "yaeP";	AATACGCAAGCGGTACGCGGAAATCGCCAGCGGAGACTTAGGATACGTTCCGGACGCGCTG
220052	-	54676.3	orphan		GTTTCCACAATTTGTAATATCATTCAGGACGGGCGCTTGCCCGTCTTGTCATTTTTACAAG
222898	+	1331.85	internal,	I:gene_id "EG11736"; gene_name "gmhB";	CCCGCAATTTTTCTTGACCGTGATGGCACCATTAATGTCGATCACGGCTATGTCCATGAGA
223637	+	1094.32	orphan		ACGCCACCTCGCGACAGTGAGCTGAAAGCCGCGTCGCAACTGCTCTTTAACAATTTATCAG
223766	+	5077.13	orphan		CAAGAGTGAACACGTAATTCATTACAAAGTTTAATTCTTTGAGCATCAAACTTTTAAATTG
225639	+	1183.38	orphan		TAAATAAAAAATACTTCAGAGTGTACCTGCAAAGGTTCACTGCGAAGTTTTGCTCTTTAAA
225751	+	57943.5	orphan		AGTCTCTCAAATTTTCGCAACACGATGATGGATCGCAAGAAACATCTTCGGGTTGTGAGGT
229007	+	15282.2	primary,	P:gene_id "EG30024"; gene_name "aspU";	TGCCTGTCACGCAGGGGGTCGCGGGTTCGAGTCCCGTCCGTTCCGCCACTTATTAAGAAGC
233782	-	140278	internal,	I:gene_id "EG10246"; gene_name "mltD";	AGTCAGGCACGATGGATGGACGATGGGACGTCTATCGCGCCAGATGGTGACTTGTGGGCTT
233999	-	40357.7	primary,	P:gene_id "G6099"; gene_name "gloB";	GGTCAAAGAAAGATAGGTTCTGATAAAACTTTCTTGTCATCGGCTCCGTTCGCCGTTATGA
237009	+	3519310	primary,	P:gene_id "EG30025"; gene_name "aspV";	CTGCCTGTCACGCAGGGGGTCGCGGGTTCGAGTCCCGTCCGTTCCGCCACTATTCACTCAT
240856	+	924.669	primary, antisense,	P:gene_id "G6104"; gene_name "ivy";,A:gene_id "G6105"; gene_name "fadE";	ATTTTAAATAATTAGCGGATAAAGAAACGGAGCCTTTCGGCTCCGTTATTCATTTACGCGG
254210	-	52953.6	primary,	P:gene_id "EG10695"; gene_name "pepD";	AATTATTTGATTTGCTGCCGGATGGCGTTTAATCGCCTTCCGGCAGTTTCATCCTTCATTA
255715	-	523152	internal,	I:gene_id "EG10695"; gene_name "pepD";	CCTGTGACCTGCAATACTGTTTTGCGGGTGATCGACAAGGAGACTTAACGTGTCTGAACTG
258780	+	797.399	internal,	I:gene_id "EG11092"; gene_name "crl";	CAACGTGAAACCGGCACCGGAAGTGCGTGAATTCTGGGGCTGGTGGATGGAGCTGGAAGCG
259042	+	10955.9	primary, antisense,	P:gene_id "EG11092"; gene_name "crl";,A:gene_id "EG10729"; gene_name "phoE";	AAGTTAACGGCGTGAGTGAAATGTGCCGGATGCATCACATCCGGCAATATTCATTAAAACT
262946	+	13556650	primary,	P:gene_id "EG30104"; gene_name "thrW";	AGCGCATTCGTAATGCGAAGGTCGTAGGTTCGACTCCTATTATCGGCACCATTAAAATCAA
292318	+	1022.21	antisense,	A:gene_id "G6148"; gene_name "yagK";	AATTTTTTGAAACAATACAAATAAGGCCTTCTCACTGAGAAGGCCATTACCGACTTACAGT
304213	-	99298.4	orphan		AGTTCCCCAGCCAACCGCGGTACGTTCTTACATACGATGTACCGCTGTTCTCTTTACGATT
310323	+	1098.56	antisense,	A:gene_id "G6164"; gene_name "ecpA";	GCCCAGTACGCCGTTGGCGGTATCGATCATCACGGTATCGCCAGTTTTTTCGACTGCCGCG
312325	+	865.27	internal, antisense,	I:gene_id "G6166"; gene_name "ykgL";,A:gene_id "G0-10434"; gene_name "ykgO";	ATATCCCCAGGAAAATTAATGTTGGTGTTATAAACACACCAACATTAATCCGATCTGATTA
313047	-	48378.4	orphan		ATCCTCTCCCTTTTTTGTAAGTAATTATTATATCCGTGGGAGAGGAATACACGCTGTCAGG
324603	-	43492.4	orphan		GACAATGACCGGGAAGGGAACCCGTTTTCAGGAATGGATGCCTGTCTTTTTCACTGTAAAT
345390	+	4300.93	orphan		TTAGCTCATCAGGAAGAGCAGACGACAACCAGGATTGTTGTATGGTACGGGGTTCGAGGCC
346858	+	1552.41	antisense,	A:gene_id "G6195"; gene_name "prpR";	ATCTATTGAAATTTATGCCGGATAAAGCGTTCGCGCTGCATTCGGCAGTTCAGCTTTTCAG
377696	+	1556.65	antisense,	A:gene_id "G6208"; gene_name "frmB";	ATTCATCTCCTGGCAGATCTTTTCAAGATTTGGAGTCCGCAGCTGTTCTGCGTAAAAATCA
396446	+	1340.32	orphan		CGTAAACACGATCTTTTTCCTGCTCACCAATGCCTGCATTTGTGATCCTGCGCGTGTTAAT
399790	-	24033.8	primary, antisense,	P:gene_id "EG10213"; gene_name "ddlA";,A:gene_id "G6229"; gene_name "yaiZ";	ACCACAATGTAATATTTTAACGCCCGATAATATTCTTATTGGGCGTTTTCAGTTTCTTCAT
401850	+	1713.59	internal,	I:gene_id "EG10727"; gene_name "phoA";	GACAAAAGCCCGGACACCAGAAATGCCTGTTCTGGAAAACCGGGCTGCTCAGGGCGATATT
403612	-	23469	antisense,	A:gene_id "EG11401"; gene_name "psiF";	GCAGAAGTATGATATTTCGGGTGAGCCATTTTCGTAGCTCACCCGTTAGCACTATCAGGTA
405787	+	1306.41	internal,	I:gene_id "G6230"; gene_name "yaiI";	GAGGATTACCCAACAAAGGATGACTTTATGACAATTTGGGTGGATGCCGACGCGTGTCCCA
407206	+	1001.02	primary,	P:gene_id "EG11093"; gene_name "yaiA";	CCTGACAAAGAGTGACCGCATCAGACTGCTCGGAAGGGATTCTGAGTGCCACTACAAGGGA
408495	+	9819.2	primary,	P:gene_id "EG12159"; gene_name "yaiE";	TGTGCCGCTATCTGTAATTCCTCGCCTTCCCCTTGAACGGGAGGGCATTTTTCTGAAATAT
427790	+	12830.6	internal,	I:gene_id "EG10938"; gene_name "secD";	GATCCGGCTGTTCAGATCACTGGTGCGCGCGGAGTCGCCGCCAGTGAGCAAACGCTGATCC
430963	-	117062	antisense,	A:gene_id "EG11097"; gene_name "yajD";	TATATTGCTGAAATAACGTAGGCCTGATAAGCGTAGCGCATCAGGCAATTTTACGTTTTAA
434622	+	852.557	orphan		AAGGGAAGCAGCGCACGAAATATTATGCTAAAATCCGCCCCCCTGCGGGGCCATACTCGAA
435608	+	4139.75	orphan		ATCCAGGCCGGTAGATTCACGGAAGACCGTTCCATGATCGCCGGCCTTTTCTTTTTTACCT
436722	+	1013.73	internal,	I:gene_id "EG10704"; gene_name "pgpA";	CGGAAGTGGATTAAGCCCGATCGTTCCTGGGACGATGGGCTCGCTGGCAGCGATTCCGTTC
438135	-	38352.5	internal,	I:gene_id "G6236"; gene_name "yajO";	GCCGCAGCACATGCAACTTGAAGTATGACGAGTATAGCAGGAGTGGCAGCATGCAATACAA
438373	+	933.144	antisense,	A:gene_id "G6237"; gene_name "dxs";	GCCAGGCCTTGATTTTGGCTTCCATACCAGCGGCATCGAGGCCGAGTTCGGCGCGCATTTC
441410	-	74417.4	orphan		GTATACCACTAACATCGCTTTGCTGTGCACATCACCTTACCATTGCGCGTTATTTGCTATT
445327	+	5178.91	antisense,	A:gene_id "G6241"; gene_name "yajR";	CGCAGCAGGCAATTCGCCGCGTTTTTTATGCCTGACGAATTGCCTGTTCTATCTCAAAGCG
446773	-	151066	primary,	P:gene_id "EG10182"; gene_name "cyoE";	GTGTGGTAACAAAACCTCTCTATTAAAAAGGTGCTACGGCACCTTTTTTCTTAGCATTAGA
448254	-	39199.7	internal,	I:gene_id "EG10180"; gene_name "cyoC";	ATTCCATCACCTGATTGTTAACGGCATGGGTCCGGATCGCAGCGGCTTCCTGTCAGCGTTC
448558	-	85290.6	internal,	I:gene_id "EG10180"; gene_name "cyoC";	ACCACGATGCAGGCGGAACCAAAATCTTCGGATTTTGGATCTACCTGATGAGCGACTGCAT
449680	-	24909.4	internal,	I:gene_id "EG10179"; gene_name "cyoB";	CTTCTCGCGTAAACGTCTGTTTGGTTATACCTCGCTGGTATGGGCAACCGTCTGTATCACC
451197	-	40075.3	internal,	I:gene_id "EG10178"; gene_name "cyoA";	CACGACGAGAAGCCCATTACCATCGAAGTGGTTTCCATGGACTGGAAATGGTTCTTCATCT
451530	-	32054.5	internal,	I:gene_id "EG10178"; gene_name "cyoA";	GGATGGTTGTCATTATTTGCAGGCACTGTATTGCTCAGTGGCTGTAATTCTGCGCTGTTAG
452393	-	235538	internal,	I:gene_id "EG12183"; gene_name "ampG";	TCGGCCCCGTGGCGGGTTGGTTTGTTGAAGCACACGGCTGGTCGACATTCTATCTATTCTC
454868	+	3282.95	orphan		CCAGTATGTTGCTAAAGATTTTATGAAAAACGGCCTGCGGGCCGTTTTGTTTTGTCTGGAT
455530	+	1094.32	internal,	I:gene_id "EG11003"; gene_name "tig";	ACTGCAGGGTCTGGAAGCGATCGAAGTTGAAAAACCGATCGTTGAAGTGACCGACGCTGAC
456492	+	1085.84	orphan		ATAACGCGCTAAATTCGCACAAAGGCCCGTCACCGCCAGGTGGTGGGCTTTTTTTTGTCAT
456706	+	784.683	internal,	I:gene_id "EG10158"; gene_name "clpP";	AATTTTATCCAGGAGACGGAAATGTCATACAGCGGCGAACGAGATAACTTTGCACCCCATA
458758	+	2765.46	antisense,	A:gene_id "G0-8861"; gene_name "sraA";	TTCCCATACAATTAGTTAACCAAAAAGGGGGGATTTTATCTCCCCTTTAATTTTTCCTCTA
461512	+	1794.17	internal,	I:gene_id "EG10467"; gene_name "hupB";	TCAATTGATCGACAAGATTGCTGCAGGGGCTGATATCTCTAAAGCTGCGGCTGGCCGTGCG
461784	+	85573.7	orphan		CAGTGGGGATGTGACGAAGTTCAAGGGCGCATCTACTGATGTGCCTTTTTTATTTGTATTC
461950	+	3206.61	internal,	I:gene_id "G6242"; gene_name "ppiD";	GAGTGTTGTTACACCATGATGGACAGCTTACGCACGGCTGCAAACAGTCTCGTGCTCAAGA
463858	+	3151.45	orphan		AAATGCGTTGCAGCTGTAACAAGAAAAGGTCGCTTTCGCGGCCTTTTCCATTTCTGAACAT
468269	+	1391.24	primary,	P:gene_id "G6246"; gene_name "cof";	TCCCCCGAATAACGAGATCCCTTCCAGCACCGGGCAATTGCCCGGTTTTTTTTGCGTTGAA
470398	+	788.921	internal,	I:gene_id "G6248"; gene_name "mdlA";	TCCTCATCCTTGATGATGCGCTTTCGGCGGTGGACGGACGCACTGAGCACCAGATCCTGCA
476561	+	7526725	primary,	P:gene_id "EG30027"; gene_name "ffs";	GCCAAGGCAGATGACGCGTGTGCCGGGATGTAGCTGGCAGGGCCCCCACCCATTTCTGCCT
477032	-	24033.8	primary, antisense,	P:gene_id "G6252"; gene_name "pdeB";,A:gene_id "EG11099"; gene_name "ybaA";	CGAGCAACATTTGTGAATTTTTGGGCTGACGGCACGCCGCACAGCCCGTCACGCTACCTAT
478552	-	42362.8	internal,	I:gene_id "G6252"; gene_name "pdeB";	CTGGTCGGCCTTATTTCGGGAGTACTGATTCTTTCAGTATTGCTGCCTGTCGGCTTAAGCA
478738	-	57246.3	primary,	P:gene_id "G6253"; gene_name "ylaC";	CATCTTAAGTTAGGGTTACATACCAGGCGTAAAGCTCTGCGCCTGGTCAAATGACAATGAT
479250	-	36064.9	internal,	I:gene_id "G6253"; gene_name "ylaC";	TTAAAATAGGGTGTTCCCTGGAAAGTTGCAGATACCACGAAGGCAAACGATGACCGAAATA
479823	-	65549.5	internal,	I:gene_id "G58"; gene_name "maa";	TCGGCAGATGAGACGTTATCTCGCGATCGCCTGCGCGCTCGTCAGCTTATTCACCGATACA
480307	-	36629.7	primary, internal,	P:gene_id "EG12429"; gene_name "tomB";,I:gene_id "EG10439"; gene_name "hha";	AATCCTGCGAGTTTATCTTGTTAGAATTATTACAACCATAGGTAGAAGTATGTCCGAAAAA
480636	-	54958.8	internal,	I:gene_id "EG12429"; gene_name "tomB";	GACATGATATCGCACAGCTTAAGTTTCTCTGTGAAACCCTGTATCATGACTGCCTTGCAAA
494017	+	1955.35	internal,	I:gene_id "EG10245"; gene_name "dnaX";	ACCCTGCGTCGGTTCTTCGATGCGGAGCTGGATGAAGAAAGTATCCGCCCCATTTGATCGT
495042	+	1798.41	primary,	P:gene_id "EG10834"; gene_name "recR";	TCATAAGATTCGTTTTTAAGCAAACGAGAGCAGGATCACCTGCTCTCGCTTGAAATTATTC
497939	+	9904.02	orphan		CACAAGCAAACTTATCAGCAATCTCAGGCCGGATATTCATTCGGCCTTTTACAAAAACCTC
507287	+	445279	primary, antisense,	P:gene_id "G0-9382"; gene_name "chiX";,A:gene_id "G6258"; gene_name "ybaP";	AAAAATGAAATTCCTCTTTGACGGGCCAATAGCGATATTGGCCATTTTTTTAGCGCAACAT
508673	+	1416.66	orphan		CACCATTGCCTGATGCGACGCTTACCCGTCTTATCAGGCCTACAAACTTGTGCCTGAACCG
517318	-	27761.8	antisense,	A:gene_id "G6267"; gene_name "fetB";	ATCGCATCATTTCTTCTTCAATTGCGTCACCACCAACTGGTGGCGCGAATTATAAAACTTA
530080	+	1259.73	orphan		TGTTTTGGATAAGGATTCGACACTCATATCAAAACCGGTAACTCTCAACCTTTCAAGGCCA
533861	+	3571.4	primary,	P:gene_id "G6276"; gene_name "allR";	GAAAGCACATCCATAATGTCTGTCGCATCCCGCTCTGCGGAGCGGGTTTTTTTGACAAAAT
553873	-	330232	internal,	I:gene_id "EG12666"; gene_name "lpxH";	TGCAGATCTTCATCTCTGCGTGGAAGAACCGGCGATCACCGCCGGTTTTCTGCGTTTTTTA
555299	+	1085.84	internal,	I:gene_id "EG10196"; gene_name "cysS";	CTGCAAGCAGCTGGGTAACCACTTTGATATCCACGGCGGCGGTTCAGACCTGATGTTCCCG
556036	+	788.921	primary, antisense,	P:gene_id "EG10196"; gene_name "cysS";,A:gene_id "EG12708"; gene_name "ybcI";	GTCGTAAGTAATTGCGCTATTGCCGGATGCGAGTTTTCGCATCCGGTTATCGTCTGCGCCA
556626	-	72412.2	primary,	P:gene_id "EG12879"; gene_name "ybcJ";	ACAGGTTGTTGCCTGATCCCTTTCCCGGCCTGTATCAACAGGCCGGTTCTCTTTTCAGACT
564799	+	9435255	primary, antisense,	P:gene_id "EG30014"; gene_name "argU";,A:gene_id "EG10507"; gene_name "intD";	AACGACCTTCTAAGTCGTGGGCCGCAGGTTCGAATCCTGCAGGGCGCGCCATTACAATTCA
568708	+	945.857	orphan		TTCTAAACGACTAAAATATGGAGGCTCTTATATTTATATGAGCCTCGTTTTATGCTTTTTG
574367	-	46655.7	antisense,	A:gene_id "G6307"; gene_name "ybcQ";	TCTGTTATATATTACCCTTTATTTTTGGGGGCGTCTCAACGCCCCATTTTTAATAATTTTT
574476	-	23469	orphan		TGATTACGAAAAAGATATGTTGCGGGAGGCGTTGCCTCCCCAACATATAAGTGGCTCCCTC
578444	-	60663.6	antisense,	A:gene_id "G6311"; gene_name "rzpD";, gene_id "G0-10436"; gene_name "rzoD";	GGGTGAAATAATCCCGTTCAGCGGTGTCTGCCAGTCGGGGGGAGGCTGCATTATCCACGCC
584631	-	439048	primary,	P:gene_id "EG10673"; gene_name "ompT";	AAGAACGCCAACTAAAATTTCCCCGAGGTGAAAATCGCCCCGGGGAATAACTAGCCATTTC
604739	-	57528.8	primary,	P:gene_id "EG50005"; gene_name "nfsB";	CACCTTAACCGAAGTGTAATTCTCTCTTGCCGGGCATCTGCCCGGCTATTTCCTCTCAGAT
607736	-	595254	orphan		GTTTGGAGTGGCAGCCCCAGGGTTGATAGAAATATCTCCTGGGGCTTCATCTTTCCAGACC
622152	-	302810	internal,	I:gene_id "EG10296"; gene_name "fepD";	CATGGAAGTTCGTATGTCTGGTTCTGTTGCCGTGACACGCGCCATTGCCGTGCCCGGATTG
624680	-	103563	orphan		AGCATTATTGATGGATTCGCATAAGCGCAATGTGATGTCCTGCGCCGTTCTGCCCCCTCTC
629954	+	1552.41	internal,	I:gene_id "EG10167"; gene_name "cstA";	CAGGGAAATACCTCGTCTGGACAGTGCTCTCTGTAATGGGAGCATTTGCTCTGGGATACAT
638796	+	1802.65	orphan		CCAAAGGGTAGTTCAGATTACACGGTCACCTGGAAAGGGGGCCATTTTACTTTTTATCGCC
639668	+	17950.2	orphan		GAAATACTTCGGAAATTCACCTAATTCTTCGGGTGCTGCGGCACCCGATTTTCTTCCCCGC
643497	-	69842.2	orphan		CACAAGCGATAACTCGCTTTGCCCAGAGGATGCACTCGCATCCTCTTTACGCAAAATCAGC
657545	+	94832.7	primary, antisense,	P:gene_id "EG12179"; gene_name "cspE";,A:gene_id "EG12209"; gene_name "crcB";	TCTGTAAGATACGTCAGCAAGAATTCAAAACCCGCTTAATCAGCGGGTTTTTTTTGGTCTT
660111	-	28609	internal,	I:gene_id "EG11306"; gene_name "lipA";	TGGCCCTTATCCCGGTTAAAAACGTGGCAACAGAGCGCGAAGCCCTGCTGCGCAAGCCGGA
660220	-	66396.7	orphan		ATCTATTGAATTGAAACGCTTTCCTTCGTAATTCGCAACTGGAACACGCACGCTATGAGTA
662338	-	73287.8	primary,	P:gene_id "EG11592"; gene_name "ybeD";	GGTTCTGTAACTCGCTTCTCCGTTACCCGGCTCCTGGTCGGGTAACTCCCCTCTCCTCGCT
664018	-	91306	orphan		AAATGACGTTAACAAAGTCACGCGGAAAGTCAGATGCCTGCCGGTAGTGCATTTGCTATAG
664101	+	1166.43	antisense,	A:gene_id "EG10854"; gene_name "rlpA";	ACTTTGTTAACGTCATTTACAGAAATTGACACATCAGATGCCTGCTTTACGCTACTGCGCG
665848	-	42927.7	internal,	I:gene_id "EG10607"; gene_name "mrdB";	ACACTGGCATCGCGCTGGTGCTGATATTTATGCCCACGCTGCTGGTGGCTGCACAGCCTGA
671542	-	42645.2	internal,	I:gene_id "EG11412"; gene_name "holA";	ACCCGGAACAACTCCGCGCGCAGCTCAATGAAGGGCTGCGCGCGGCGTATCTTTTACTTGG
675562	+	2498.28	antisense,	A:gene_id "G6351"; gene_name "ybeQ";	CGCACAGCAATAAAGAGAATATGGGCCGAATGAAATTCCCCGGCCCTTGTTTTTATCTCTA
675677	+	1323.37	antisense,	A:gene_id "G6351"; gene_name "ybeQ";	CTGAACTTTACGATACAGGTCGAGAGCCTGTCGGAGATCGACAGGTCTTCCTTCTCCGTAG
683425	-	91023.9	orphan		ACACGTCATTGATTAAGATCACCACGCGTTACCTGGGTGGTCTTAATCTGTTTATCTCTTT
686683	-	42927.7	internal,	I:gene_id "G0-9383"; gene_name "sroC";	GCTGGGTAACAATCTTCGAGGGTAGCAGTTAACGCTGCTACCCTCTTTTTTCTGGAGTAGA
689338	+	1416.66	antisense,	A:gene_id "EG10168"; gene_name "lnt";	CGCATCCGGTGAGCGTGCCGAAATATGGGATGTATTCCGGCACGATAAGAAGGGATTATTT
690737	-	27761.8	internal,	I:gene_id "EG10168"; gene_name "lnt";	ACGTCTGGCCTGCGGCGATTATTTCGCTGATGGGGCTTCAGGCGTTGACCTTTAACCGCCG
693499	-	38352.5	primary,	P:gene_id "G6364"; gene_name "miaB";	GGGTTATTATCAGCCGTAATTCTCAGGCCTGCCGTTCCGGTGGGCCTTGTTTTTTCTCTCT
696963	-	113535500	primary,	P:gene_id "EG30052"; gene_name "leuW";	TAGGTTCTGGCGCCGCAAGGTGTGCGAGTTCAAGTCTCGCCTCCCGCACCATTCACCAGAA
701370	-	62132.3	internal,	I:gene_id "EG10636"; gene_name "nagC";	CGCGGGCTGATCAAAGAAGTTGATCAGCAGGCCTCCACCGGGGGCCGCCGCGCTATCTCCA
708334	+	9628.28	internal,	I:gene_id "G6370"; gene_name "chiP";	TCGCTGTTCACCTTTGGTGCAGCAATTTATACGTCAAAGAGGATTAACCCATGCGTACGTT
710187	+	2061.36	antisense,	A:gene_id "EG10359"; gene_name "fur";	TTTTCTTATTTCCCTTGCATAAAAAAGCCAACCCGCAGGTTGGCTTTTCTCGTTCAGGCTG
710645	-	137086	internal,	I:gene_id "EG10359"; gene_name "fur";, gene_id "G0-10580"; gene_name "uof";	GTCACTTCTTCTAATGAAGTGAACCGCTTAGTAACAGGACAGATTCCGCATGACTGATAAC
710897	-	47785.2	primary,	P:gene_id "EG10318"; gene_name "fldA";	TCTCAATGCCTGATGTGATGCGGCGTAGACTCATGTCTACGCCGTATTAATAGATAATGCC
729241	+	869.508	internal,	I:gene_id "EG11521"; gene_name "ybfA";	GTTGCAGCGGGCGTTCTGGCGCTGCCTTTCATGCTTTTCTGGAAAGACCGCGCCCGCTTTT
753129	-	254431	orphan		GATTGCTAAGTTGTAAATATTTTAACCCGCCGTTCATATGGCGGGTTGATTTTTATATGCC
754647	-	45526	orphan		GTTATTAGTGGTAGACAAGTTTAATAATTCGGATTGCTAAGTACTTGATTCGCCATTTATT
755091	+	2201.35	orphan		GCAGTTATAGAAAGGACGCTGTCTGACCCGCAAGCAGACCGGAGGAAGGAAATCCCGACGT
756662	+	2332.86	internal,	I:gene_id "EG10931"; gene_name "sdhA";	ATGGAAATGTGGCAGTTCCACCCGACCGGCATTGCCGGTGCGGGCGTACTGGTCACCGAAG
757887	+	1942.64	internal,	I:gene_id "EG10932"; gene_name "sdhB";	CGTTCCGCCGCTCCTGCCGTGAAGGTGTGTGCGGTTCCGACGGTCTGAACATGAACGGCAA
758531	+	1403.95	orphan		CCTACAAGTCATTACCCGTAGGCCTGATAAGCGCAGCGCATCAGGCGTAACAAAGAAATGC
758707	+	2430.4	internal,	I:gene_id "EG10979"; gene_name "sucA";	GTAGTATCCACGGCGAAGTAAGCATAAAAAAGATGCTTAAGGGATCACGATGCAGAACAGC
759183	+	1866.29	internal,	I:gene_id "EG10979"; gene_name "sucA";	CATTTGCCAGCGGCAAAGAAACCATGAAACTCGGCGAGCTGCTGGAAGCCCTCAAGCAAAC
762343	+	950.097	internal,	I:gene_id "EG10980"; gene_name "sucB";	GGCGATGACGTGGTTTACCACAACTATTTCGACGTCAGCATGGCGGTTTCTACGCCGCGCG
762981	+	1569.37	orphan		GTGACCGACAATGCCCGGAAGCGATACGAAATATTCGGTCTACGGTTTAAAAGATAACGAT
765148	+	19841.8	antisense,	A:gene_id "EG11109"; gene_name "mngR";	CGAAGGGCTGTCGGTTTCGACATGGTTGGCCATCGTATGATGGCCTTTTTTGTGCTTATCG
771437	+	1493.02	orphan		TGGGGCATGCGTGTGACCCTTTCTAACGGGGTTCACTCTCGGAGTCTTCATGCGATGAGCA
774374	+	1573.61	internal,	I:gene_id "EG12395"; gene_name "ybgE";	GCGACTTTGTATGCGGTAATGGACAAGCGCCCCCTGCGGGCGCTTTCCTTCGTGATGGCGC
779674	+	9526.47	internal,	I:gene_id "EG12854"; gene_name "cpoB";	ATTGAGTCTGTCGTTACTGGTTGGTATAGCGGCCCCCTGGGCCGCTTTTGCTCAGGCACCA
780434	+	12432	primary,	P:gene_id "EG12854"; gene_name "cpoB";	ATGTAATGCATAACACACGACCAGAAGTCGCATTATTTCTGGTCGTGTCGTGCGAATCATA
780842	+	168766	primary,	P:gene_id "EG30109"; gene_name "valT";	CTCCCTTACAAGGAGGGGGTCGGCGGTTCGATCCCGTCATCACCCACCACCGGGTCGTTAG
781146	+	28660	primary,	P:gene_id "G6389"; gene_name "valZ";	TCCCTTACAAGGAGGGGGTCGGCGGTTCGATCCCGTCATCACCCACCACTCGGGTCGTTAG
781448	+	13479.5	primary,	P:gene_id "G6391"; gene_name "lysZ";	GACTTTTAATCAATTGGTCGCAGGTTCGAATCCTGCACGACCCACCAATTTAAAGGTGGTT
787769	-	38352.5	primary,	P:gene_id "EG11698"; gene_name "galM";	AATATCAGTTTATTGCTGAGTAATGTTACGCCCTCGTCATGAGGGCTTTATCTCATATTGT
792005	-	48350.1	internal,	I:gene_id "EG10362"; gene_name "galE";	ATGAGAGTTCTGGTTACCGGTGGTAGCGGTTACATTGGAAGTCATACCTGTGTGCAATTAC
794828	+	3270.24	internal,	I:gene_id "G6396"; gene_name "acrZ";	AGAGTTATTAAAAAGTCTGGTATTCGCCGTAATCATGGTACCTGTCGTGATGGCCATCATC
794954	+	3223.56	primary,	P:gene_id "G6396"; gene_name "acrZ";	GCCCGGACAAAATCATTGATTCCCTGAATGCCCGCTTAGTCGGGCATTTTCTTTTTCTCAA
798381	+	1493.02	antisense,	A:gene_id "EG11239"; gene_name "ybhA";	TCGCGAGCGCGGGCCAGGGCTTCTATCGATGAAGGAAGCAGGGTCTTTTTCGGGGTCAATA
805822	-	23469	orphan		TGCCTTATCTGGCCTACAGATTCGATGCGATTCGTAGGTCGGATAAGATGCGCAAGCATCG
817052	+	9607.01	internal,	I:gene_id "EG11595"; gene_name "moaA";	AAGGAAGAAATGACTTCGCCTCCCGTATCTGGAAAGGTGTACATGGCTTCACAACTGACTG
817214	+	933.144	internal,	I:gene_id "EG11595"; gene_name "moaA";	GTCACCAATAAAGGCTTTCTTACCGTCGATGAAATTCGCCGGGTTACGCGCGCCTTCGCCA
824690	+	2171.68	internal,	I:gene_id "G6408"; gene_name "ybhQ";	AACAACGTGTTCGTGTCGCAACGGGTCTAAGTTGCTGGCAGATTATGTTGCATTTACTGGT
825080	+	4708.1	primary, antisense,	P:gene_id "G6408"; gene_name "ybhQ";,A:gene_id "G6409"; gene_name "ybhR";	TACGCCGCTGACCCTGTCGTGGCCGTTATCACCAGTAGCGGCCACAAACTATTCCACACAA
838167	-	63826.7	primary,	P:gene_id "EG12421"; gene_name "ybiI";	AGGTTCGAAAGACAGCCAGTTACGTTAACTACAACTGGCGAGATGCATAGCGAGTATAATT
847200	-	30331.8	orphan		ACACCTGTAAAACGCACTGGCAGTTCCCTCTCCCCTATGGGGAGAGGATTAGGGTGAGGGG
848340	-	89018.4	orphan		CAGAACTTTAGTACCCGATAAAAGCGGCTTCCTGACAGGAGGCCGTTTTGTTTTGCAGCCC
850293	+	2116.53	orphan		GAATAATCTGGATGAATGACAGGGAAAACATGCGTAATACTTACGCAGTTCTCTGAAAAAG
850455	+	1268.21	internal,	I:gene_id "EG12117"; gene_name "ompX";	TATATTTAAAACTTAGGACTTATTTGAATCACATTTGAGGTGGTTATGAAAAAAATTGCAT
850718	+	869.508	internal,	I:gene_id "EG12117"; gene_name "ompX";	TACTGCAAGCTCTGGTGACTACAACAAAAACCAGTACTACGGCATCACTGCTGGTCCGGCT
851011	+	2383.72	primary, antisense,	P:gene_id "EG12117"; gene_name "ompX";,A:gene_id "G6418"; gene_name "opgE";	TCTAATCACTTTGGTGATATAAAAAATCCGCCTCTCGGGGCGGATTTTTGTTTTTAAGGTT
852816	-	119887	internal,	I:gene_id "G0-8881"; gene_name "rybA";	GCGTCGCGGTACGCCGCTTCACTCCTGCTTTCATGCAGGCATAACGCGTTTTGGTCTGAAA
870014	-	209498	antisense,	A:gene_id "G6430"; gene_name "gsiB";	TATGCTGTCCAGTTTGGGCAATCCTGGCTGCCAGTAACCCGCGAATTTTTTCACCTTCACA
887977	-	180071	primary, antisense,	P:gene_id "G0-8880"; gene_name "rybB";,A:gene_id "G6444"; gene_name "rcdA";	GTGGAGCCCATCAACCCCGCCATTTCGGTTCAAGGTTGATGGGTTTTTTGTTATCTAAAAC
889895	-	23186.7	orphan		ATATATTGTTACTTTACTATCGTTTAGGTGCGCTGAATGAATCTGCGCCCTGAATTCTGGT
890462	-	71819.1	primary, antisense,	P:gene_id "EG10417"; gene_name "grxA";,A:gene_id "G6446"; gene_name "ybjM";	AAAATCTGGACGCCTGATCGTCTGACAAGCCCTCGCGTTGAGGGCTTTACTGATTTTTTCT
893482	+	2994.51	primary,	P:gene_id "G6447"; gene_name "ybjN";	GATAACTCCTTTCGAGCACGCAGTCGCTGGTGCAGTGGCTGCGCGCTGCAAAATTATCTGC
922302	-	27761.8	antisense,	A:gene_id "G6462"; gene_name "macB";	TTGTGTACATCCTAAAGGCAAAATGCCAGCCCGATCGGCTGGCATTTTTATCTCAAAAATT
923210	+	6090.86	internal,	I:gene_id "G6463"; gene_name "clpS";	CCAAAGTGGCGATGGTGAACAAGTACGCGAGGGAGAATGAGCATCCATTGCTGTGTACGCT
926159	-	566192	orphan		ATGGGCGAAGAGAAAGAACGAGTAAAAGGTCGGTTTAACCGGCCTTTTTATTTTGTGATAT
926568	-	55806	orphan		GTTTATCTCACCGCTCCCTTATACGTTGCGCTTTTGGTGCGGCTTAGCCGTGTGTTTTCGG
931023	-	30614.2	orphan		AGTAACAAAAGTAAAGAAGGCGACACCATGCGACTATGGGTCGCCTTTATTTTTTCCCCGT
932430	+	9747.09	orphan		ATGTTTACCGTGCTAGTGAAATCTACGTATGGCGTGGACAGACGCCATTCGTGATGTCGAT
933176	+	4691.15	orphan		ACTCCTGTTAATCCATACAGCAACAGTACTGGGGTAACCTGGTACTGTTGTCCGTTTTAGC
934931	+	1319.13	internal,	I:gene_id "G6464"; gene_name "ftsK";	CTGGCGTGAAAAAAGCGACACTGGCGACGGGGGCTGCCGCAACCGTTGCCGCGCCAGTCTT
938065	+	856.794	internal,	I:gene_id "EG12690"; gene_name "rarA";	TTTTCGGATAATACTTTTCAACCTCTGGCCGCGCGTATGCGGCCAGAAAATTTAGCACAGT
939429	+	2485.55	internal,	I:gene_id "EG10947"; gene_name "serS";	GCAGGCTGTGGCCACATCTCCCATTTAATTCGATAAGCACAGGATAAGCATGCTCGATCCC
951156	-	45497.7	orphan		TTTAGCGCGAGAGCCTTTTTTGTCAGCTATCTATACTTTAAGGTGACTGCCAAAACAGACT
954794	-	73541.9	orphan		TAATGATTAGTCTGAGTTATATTACGGGGCGTTTTTTTAATGCCCCGCTTTACATATATTT
961969	+	856.794	orphan		ATGACAGCGGGTATGTTAAACAACCCCATCCGGCATGGAGCCAGGTGGACGTTAAATATAA
963777	+	9925.08	orphan		AGGTTTCGTCCTGTAATCAAGCACTAAGGGCGGCTACGGCCGCCCTTAATCAATGCAGCAA
964165	+	8915.67	orphan		TTTTTACTCAAACTTGAACGAGAGAAAAGCACCTGTCGGGTGCTTTTTTCATTTCTCTAAT
971644	+	3541.66	primary,	P:gene_id "EG10519"; gene_name "kdsB";	GCTAATTTCACTTCACGACACTTCAGCCAATTTTGGGAGGAGTGTCGTACCGTTACGATTT
973638	+	869.508	internal,	I:gene_id "EG12167"; gene_name "cmoM";	TACGGCACCACCAAAGGGCAGCTTCGACAGGCTATTCTGTGGCAGGATCTCGATCGCGTGC
983121	+	937.381	internal,	I:gene_id "G6474"; gene_name "ycbK";	TATCATGGACAAATTCGACGCTAATCGCCGCAAATTGCTGGCGCTTGGTGGCGTTGCACTC
984479	-	26603.8	primary,	P:gene_id "EG10096"; gene_name "aspC";	CAGTGCTGTAAGCATTAAAAACAATGAAGCCCGCTGAAAAGCGGGCTGAGACTGATGACAA
985649	-	33777.3	internal,	I:gene_id "EG10096"; gene_name "aspC";	ACATTACCGCCGCTCCTGCCGACCCGATTCTGGGCCTGGCCGATCTGTTTCGTGCCGATGA
985841	-	334046	orphan		GCACACCTCTTTGTTAAATGCCGAAAAAACAGGACTTTGGTCCTGTTTTTTTTATACCTTC
986970	-	28044.2	internal,	I:gene_id "EG10671"; gene_name "ompF";	GGCAGGTGTCATAAAAAAAACCATGAGGGTAATAAATAATGATGAAGCGCAATATTCTGGC
987644	+	933.144	antisense,	A:gene_id "EG10094"; gene_name "asnS";	GGCGTTACGCGGAGTACGTGGGAACGGAATCACATCACGTACGTTTTGCACGCCAGTTACG
990303	-	34059.8	internal,	I:gene_id "EG10742"; gene_name "pncB";	ACACAATTCGCTTCTCCTGTTCTGCACTCGTTGCTGGATACAGATGCTTATAAGTTGCATA
990599	+	2362.53	orphan		TTCTGCATAGCGCGATTTACGCAACAGGAATAGACTGAACACCAGACTCTATAAAAGATGC
993275	+	1794.17	primary, antisense,	P:gene_id "EG10696"; gene_name "pepN";,A:gene_id "EG12358"; gene_name "ssuB";	ACTGGCTTGATAAATAACCGAATGGCGGCAATAGCGCCGCCATTCGGGGAATTTACCCCTG
1006586	+	937.381	antisense,	A:gene_id "G6487"; gene_name "ycbX";	AAGAATGGTGCCATCATCGCCCATTGCTGATTTTTTCAGCGGCGTGACTTCGCCTTCTAAA
1015897	-	91588.5	antisense,	A:gene_id "EG50004"; gene_name "rmf";	AATCAGACAGAGTATCAAAAGGCGAAACCTCCGCAATGCGGAGGTTTCTTTTTAAAGAGAC
1015927	+	1179.14	primary, antisense,	P:gene_id "EG50004"; gene_name "rmf";,A:gene_id "EG10273"; gene_name "fabA";	GCCTGATTCTGTCTCTTTAAAAAGAAACCTCCGCATTGCGGAGGTTTCGCCTTTTGATACT
1019558	-	25756.6	internal,	I:gene_id "EG10669"; gene_name "ompA";	AGTACGCGATCACTCCTGAAATCGCTACCCGTCTGGAATACCAGTGGACCAACAACATCGG
1019851	-	75857.8	internal,	I:gene_id "EG10669"; gene_name "ompA";	CCATGAAAACCAACTGGGCGCTGGTGCTTTTGGTGGTTACCAGGTTAACCCGTATGTTGGC
1020120	-	284198	orphan		ATAAGCCGAAGATATCGGTAGAGTTAATATTGAGCAGATCCCCCGGTGAAGGATTTAACCG
1026525	-	745954	primary, antisense,	P:gene_id "G6497"; gene_name "mgsA";,A:gene_id "EG10426"; gene_name "helD";	CGCGGACCGTCTGAAGTAATATTGCACAGGTGGCAAACGCCACCTGTTTCTTACGGTTTTC
1026974	-	37194.5	internal,	I:gene_id "G6497"; gene_name "mgsA";	ATGTACATTATGGAACTGACGACTCGCACTTTACCTGCGCGGAAACATATTGCGCTGGTGG
1028644	-	24909.4	internal,	I:gene_id "G6500"; gene_name "hspQ";	CAGCAGGTCCGCCATTCCCTGTTAGGTTATCTCGGAGTGGTCGTGGATATCGACCCGGTTT
1030253	-	60381.2	antisense,	A:gene_id "G6502"; gene_name "yccX";	ATGCGGCTCGCTGAGCACCCGTTCTACACGCGCAGAACGCGGGCCGCCACTCTTTAACCAC
1030711	-	257284	primary,	P:gene_id "EG11113"; gene_name "yccA";	TAATCTCACCCGCTAACACTTTCATAGCCTCGCTTTATGCGGGGCTTTGTTTTTTGTTACA
1031409	-	40357.7	internal,	I:gene_id "EG11113"; gene_name "yccA";	ATGCTGCTTAATTAATTACATCTGTCATAGAGAGTGACTCAATGGATCGTATTGTTAGTTC
1031625	-	867804000	primary,	P:gene_id "EG30093"; gene_name "serT";	AAACCGGCGACCCGAAAGGGTTCCAGAGTTCGAATCTCTGCGCTTCCGCCAAATAAGATAA
1050653	-	202382	orphan		AGTCGTATTTCCAGAGGGGGATAGTTAACAATCTTATATTTCCCTCTGCGCGCCTTTCCTA
1051901	+	4283.9	internal,	I:gene_id "G6512"; gene_name "ymcE";	GCCGCTGGATTTCACAAAATAATATCAGGCTCCCTCGTGGAGCCTTTTTTATATCTGCCTT
1052279	+	11231.6	primary, antisense,	P:gene_id "G0-9662"; gene_name "gnsA";,A:gene_id "G6513"; gene_name "yccM";	AAAATAATGTGATTTTGTGAACATCACCCCGTGCGAGGTGATGTTCCGCTTGTTGCTAATT
1074879	-	29202.2	primary, antisense,	P:gene_id "EG10801"; gene_name "putA";,A:gene_id "EG12301"; gene_name "rutR";	TATAGGTTAAACAGGTAGCCGGAGGATGTTACAACCTCCTCCGGCATCTTTAACGTGGTCG
1079260	+	2489.8	orphan		CGCCCTGGTAAAACATAAACTCTGTTACCCCGTTCCGGTGGCAGATATAACGGCAAGTTTC
1120652	-	175128	primary,	P:gene_id "G6557"; gene_name "bssS";	AACATGACATGACCATCCACCCAAAAGGCACCTCACCGGTGCCTTTACCATTTCTGGGTTG
1120954	-	46655.7	internal,	I:gene_id "G6557"; gene_name "bssS";	CATTGAACCTCGAATAACGTTGTCTAGTAACACGAATTAGGGGGCCATGATGGAAAAAAAT
1122685	-	36064.9	primary,	P:gene_id "EG11117"; gene_name "yceB";	TTGTCATTCCATTTACTGATTAATCACGAGGGCGCATTCGCGCCCTTTATTTTTCGTGCAA
1144325	-	68119.5	internal,	I:gene_id "EG10859"; gene_name "rne";	AAGTTACGATGAAAAGAATGTTAATCAACGCAACTCAGCAGGAAGAGTTGCGCGTTGCCCT
1146757	+	1242.78	primary,	P:gene_id "G0-8862"; gene_name "sraB";	CAATGTGTGCGAATTATTGGCAAAAGGCAACCACAGGCTGCCTTTTTCTTTGACTCTATGA
1146918	+	2430.4	internal,	I:gene_id "EG11119"; gene_name "yceD";	CTATACCCCTGATCAGGTTGAGCGCGTCGCCGAATCCGTAGTCAGTGTGGACAGTGATGTG
1147206	+	1654.19	internal,	I:gene_id "EG11119"; gene_name "yceD";	AATGGTTGAAGATGAAATCATCCTCGCCTTGCCGGTAGTTCCGGTGCATGATTCTGAACAC
1147348	+	2035.93	primary,	P:gene_id "EG11119"; gene_name "yceD";	AGCTTAAAGCGTAAGTAATTGGTGCTCCCCGTTGGATCGGGGATAAACCGTAATTGAGGAG
1147708	+	79571.1	internal,	I:gene_id "EG11437"; gene_name "plsX";	GGGATTTTGGCCCTTCCGTGACAGTGCCTGCAGCATTGCAGGCACTGAATTCTAATTCGCA
1151316	+	784.683	internal,	I:gene_id "EG11318"; gene_name "fabG";	TATCCTGGCGCAGGTTCCTGCGGGTCGCCTCGGCGGCGCACAGGAAATCGCCAACGCGGTT
1151888	+	385988	primary,	P:gene_id "EG50003"; gene_name "acpP";	GCCACCAGGCGTAAGTGAACATCTCCAGGCGGTCGTTCGACCGCCTGAGTTTTATCTTTTT
1153228	+	4708.1	primary,	P:gene_id "EG12606"; gene_name "fabF";	TAAGTTGTCATTTTCCACCCTTATAAAAGGTCCGCTTGCGGGCCTTTTTTCTTAGCTTTTA
1157957	+	1798.41	internal,	I:gene_id "EG10787"; gene_name "ptsG";	TAAATCGCTGATGCTGCCGGTATCCGTACTGCCTATCGCAGGTATTCTGCTGGGCGTCGGT
1162434	+	788.921	internal,	I:gene_id "G6564"; gene_name "ycfL";	AGAAAAGCCCTTCCTTTCGACGTCTGATATTCAACCTTCAGCATCCTCAACGCTTTATAAC
1190574	-	33184.2	primary,	P:gene_id "EG11314"; gene_name "purB";	CTGAAATAAACCTCGTATCAGTGCCGGATGGCGATGCTGTCCGGCCTGCTTATTAAGATTA
1193561	-	64673.9	internal,	I:gene_id "EG11344"; gene_name "mnmA";	CTGGCTGATGCCCAGGCTGTCTGCGACAAGCTCGGCATTGAACTGCACACCGTTAACTTTG
1196422	+	5810.89	primary,	P:gene_id "EG10489"; gene_name "icd";	AATGCCGTAGTTTGTTAAATTTATTAACGGGAGCGTAACGCTCCCGTTGTTTTTTGTTAGG
1196789	-	28609	antisense,	A:gene_id "G0-8897"; gene_name "C0293";	GTCTCAGTACTAAAGATGTATGTGAAGGGGCCGCGCTCGCGGCCTTTTTTACATTCCGCAT
1199695	+	1251.26	antisense,	A:gene_id "EG12370"; gene_name "intE";	AGAAATTCAATGTGGCGTTGAGATGCTTAAAGGTTCACAACGCTACTTTGCTCCATCCTTT
1201257	-	29484.5	internal,	I:gene_id "G6586"; gene_name "ymfH";	CTGGTGTGCAACCTTCGCCAGGCACCGGGGGCACCCGACACCACAACTTTATGCTGTGTGT
1201423	-	109099	orphan		TGTGAGAACTCCAGCATACCACCGAGCCTGAAGTGGTGAAAAGACAGGCACATAACAGCTA
1203751	-	14457600	antisense,	A:gene_id "G6591"; gene_name "ymfL";	AGAAGCAATCGACGCCACGACGCCCGGAGCTGCACACTCGCGGGCGTCATTACTTTCTGAA
1218676	-	53800.8	antisense,	A:gene_id "G6608"; gene_name "pdeG";	GTTGTTCTTTCGTTTCGACACCTTCAGCGACGATACTGATCGAAAGTTTACGCGCCAGATC
1224225	-	117910	orphan		CGCTGTAAAAGCGCATTTATCTTCAAGGCAGAGTTATCTCTGCCTTGAGTTTTTCATCCCT
1226099	-	72101.4	orphan		CATGCCTTATAGTCTTCGGAACATCATCGCGCGCTGGCGATGATTAATAGCTAATTGAGTA
1226224	+	1493.02	orphan		AAGTCACCCTCCCATTTATTCAGAGTAAAAGTCTATTCTGTGATAAATGGCGCTGATTCAT
1227065	+	1017.97	antisense,	A:gene_id "G6615"; gene_name "pliG";	CAGAGAGGAGTGGGGCATTAACGTTTATGACGGGGAGAGTCCCCGTCGGTTGACATTTACT
1228243	+	1017.97	internal,	I:gene_id "G6617"; gene_name "ycgM";	GAAGAGCCAGTGCTGTTTATTAAACCAGAAACGGCACTGTGCGATCTGCGGCAGCCATTGG
1232468	-	44650.4	primary, antisense,	P:gene_id "EG11393"; gene_name "dsbB";,A:gene_id "EG11056"; gene_name "umuC";	TGATCTGTTCGGTCGCTAATCCATTCGGCGCTCCTGCGGGAGCGCTTTTTTCCTGCCGCTA
1239144	+	1013.73	internal,	I:gene_id "EG11408"; gene_name "dadX";	GAAAGGACCGATCCTGATGCTGGAAGGATTTTTCCATGCTCAGGATCTGGAGATTTATGAC
1240020	+	1090.08	orphan		AGGCAACGTCTTCTGGGTGCAAAAAAATCATCCATCCGGCTGGTCAGCAACTGTAGTTGTT
1247656	-	52953.6	primary,	P:gene_id "EG12399"; gene_name "dhaM";	GTCAGGGTTAAGCCACTGTTCGGATGGCATCGTTCTGATGTCATCCGGCAATTTACTCAGC
1248695	-	25191.8	internal,	I:gene_id "EG12399"; gene_name "dhaM";	GCCATGCATGCGCTGGAAGCCAAACGTGAACAACTGGGTTTACCGTCCTCCGACACTGAAA
1252968	-	25191.8	antisense,	A:gene_id "G6628"; gene_name "dhaR";	TCACTCTGATGTATCAGAAATCGTTTCTGTCTTTCATACCCGGCGCTTAAACTGCCCTGCA
1256636	-	46627.2	orphan		CATGAAGAGCGCAAAAGTATATAAAATCCACGCAATTGCGTGGATTTTTCATTTCACCGAG
1258823	+	9115.03	internal,	I:gene_id "EG11533"; gene_name "ychH";	AAGTTCCGGAGGTGACATATGAAACGCAAAAACGCTTCGTTACTCGGTAACGTGCTCATGG
1259119	+	4004.01	primary, antisense,	P:gene_id "EG11533"; gene_name "ychH";,A:gene_id "EG12392"; gene_name "dauA";	ACAAATAATGCAGTTTGCTGACCAGTCAGTTTGCGCTGACTGGTCAATCTCGTACTTATAA
1260889	-	25474.2	primary,	P:gene_id "EG10774"; gene_name "prs";	TTCGAACACTAATCGAACCCGGCTCAAAGACCCGCTGCGGCGGGTTTTTTTGTCTGTAATA
1261964	-	159708	orphan		TGAGTTTCGGTGACAACGTCACCTTGTTCCAGACGTTGCATCGCGCTCTTTAATACACCGC
1263775	+	1268.21	internal,	I:gene_id "EG10427"; gene_name "hemA";	AGCACTCGGTATCAACCATAAAACGGCACCTGTATCGCTGCGAGAACGTGTATCGTTTTCG
1269360	+	6761.06	internal,	I:gene_id "G0-9603"; gene_name "rdlA";	CTATTCTTGAATTGTTCTGGTTCAAGATTAGCCCCCGTTCTGTTGTCAGGTTGTACCTCTC
1269895	+	1259.73	internal,	I:gene_id "G0-9606"; gene_name "rdlB";	CTATTCTTGAAGTGTCTGGTTTCAAGATTAGCCCCCGTTCTGTTGTCAGGTTTTACCTCTC
1270430	+	1272.44	internal,	I:gene_id "G0-9608"; gene_name "rdlC";	CTATTCTTGAAGTGTCTGGTTTCAAGATTAGCCCCCGTTTTGTTGTCAGGTTTTACCTCTC
1270748	+	869.508	antisense,	A:gene_id "EG11753"; gene_name "chaA";	AGGAATTTATATTATCTCCCCCGATTACCGTCATCGGAGGAGATATAACTGTCAGGCAAAT
1273216	-	85855.4	primary, antisense,	P:gene_id "EG12404"; gene_name "ychN";,A:gene_id "EG12403"; gene_name "chaC";	GATAAAGTGCTCACATTTTAATGTTTGAGGGGGCGTCTGACGCCCCACTATGCGGGAAGTT
1287242	-	4812585	primary,	P:gene_id "EG30108"; gene_name "tyrV";	AAATCTGCCGTCATCGACTTCGAAGGTTCGAATCCTTCCCCCACCACCATCACTTTCAAAA
1287359	-	35500.1	orphan		CCGAAGGGTGAGGAGCGAAGCGACGAATAATCCTTCCCCCACCACCATCTCAAGCATTACC
1287534	-	116470	primary,	P:gene_id "EG30106"; gene_name "tyrT";	ATCTGCCGTCATCGACTTCGAAGGTTCGAATCCTTCCCCCACCACCATAATTCACCACAGC
1289157	+	1425.14	antisense,	A:gene_id "EG12119"; gene_name "ychJ";	CTACCACAGGGACAAAGCTGAGACACAAATAATCTCCCTGGAAACAATAACGGCGTATTAA
1292475	-	188656	primary,	P:gene_id "EG10457"; gene_name "hns";	TCCTGATCAAGCAATAATCTTTTGTAGATTGCACTTGCTTAAAATCCCGCCAGCGGCGGGA
1292589	-	32337	internal,	I:gene_id "EG10457"; gene_name "hns";	CAAAATATAGCTACGTTGACGAAAACGGCGAAACTAAAACCTGGACTGGCCAAGGCCGTAC
1292896	-	50383.6	internal,	I:gene_id "EG10457"; gene_name "hns";	CAATATAAGTTTGAGATTACTACAATGAGCGAAGCACTTAAAATTCTGAACAACATCCGTA
1294198	+	3524.72	orphan		GAATTTCTTTACTGACAGGGTGAGCAGGGCACTTTTATCCTGTCAGTTCGTTTTACGCACT
1295324	-	53800.8	orphan		ATCCTTAAACTGAGGCACTATAACGGCTTCCACAACAGGGAGCCGTTTTCTTATGCCACTT
1298255	-	309050	orphan		CCTGGAAGTGACGCATTAGAGATAATAACTCTAATGTTTAAACTCTTTTAGTAAATCACAG
1299498	+	1883.23	orphan		AATTGAAATGATATTATTAATTCCACTGCCTTTGGTAGAGGAAAGTGCTAAGGAAGGTGCG
1300918	+	6481.09	orphan		TGCAAAATGTATTGGCGAGTAAGAACCGCATTTGGTACTTTCCGGGCAACCGCCAGACGAT
1301236	+	1102.8	internal,	I:gene_id "EG10674"; gene_name "oppA";	CCAACATCACCAAGAGAAGTTTAGTAGCAGCTGGCGTTCTGGCTGCGCTAATGGCAGGGAA
1301719	+	1013.73	internal,	I:gene_id "EG10674"; gene_name "oppA";	AAGCTATTGATGATCACACATTAGAAGTCACCTTAAGTGAACCCGTTCCGTACTTCTATAA
1302856	+	3660.47	primary,	P:gene_id "EG10674"; gene_name "oppA";	AGCACTAATGGCAATACGTGGGGCAGGAGTGTCCTGCTCCACGGTGTCTGATTTTTATCGC
1308845	+	937.381	internal,	I:gene_id "G0-8891"; gene_name "yciY";	GGAGTAGAACGGAAGTGGGGCGCTGGCGCATGCAGCGTCAGGCTAGCCGACGTAAATCGCG
1308963	-	30049.4	antisense,	A:gene_id "G0-8891"; gene_name "yciY";	TTTAAAGACGGAAGAGTAAACTTATTGGGCACCGCAATGGTGCCCAGTACATTTAGATATT
1308992	+	14251.6	primary, antisense,	P:gene_id "G0-8891"; gene_name "yciY";,A:gene_id "EG11606"; gene_name "kch";	TTGCGATCTACAATATCTAAATGTACTGGGCACCATTGCGGTGCCCAATAAGTTTACTCTT
1310519	-	59223.2	primary,	P:gene_id "EG11607"; gene_name "yciI";	AATAGAGATTCAATATTTAAGGGCACGGTTTTTGCAACCGTGTTCTTGTTTGGCCTTTCCT
1327761	+	933.144	primary, antisense,	P:gene_id "EG12433"; gene_name "rluB";,A:gene_id "EG10130"; gene_name "btuR";	GTAATAATAACGGTTAATCAAAGTATGCCGGACGTCATATCCGGCATTTTTACAGATTAAT
1330384	-	98168.8	primary, antisense,	P:gene_id "EG12868"; gene_name "yciN";,A:gene_id "EG10956"; gene_name "sohB";	TATCATCTGGTTGATTAAAGCAAAACGCGAGGTCTTAGCCTCGCGTTTGTCTTTTACATCA
1330415	+	784.683	primary, antisense,	P:gene_id "EG10956"; gene_name "sohB";,A:gene_id "EG12868"; gene_name "yciN";	AAAAGCCATTGATGTAAAAGACAAACGCGAGGCTAAGACCTCGCGTTTTGCTTTAATCAAC
1333823	+	1420.9	orphan		TTTTATTATTAAATCGTATTAGTCACCCGCCAGGTGTGACGAAAAAACGATGTTCTGATGG
1335835	+	1255.49	internal,	I:gene_id "EG11325"; gene_name "acnA";	CCTGAAGAGAATCAGGGCTTCGCAACCCTGTCATTAAGGAGGAGCTATGTCGTCAACCCTA
1339157	-	70689.4	internal,	I:gene_id "EG11331"; gene_name "ribA";	TATGGCAAAATAAGCCAATACAGAACCAGCATTATCTGGAGAATTTCATGCAGCTTAAACG
1343547	-	107065	primary,	P:gene_id "G6638"; gene_name "yciT";	ACCATTTCCCTTCTCTACGGATGATTTGCAGTTTGGCAAATCATCCGCTCTAAGATGATTC
1350208	-	223252	primary,	P:gene_id "EG11528"; gene_name "fabI";	TGAAATAATCGTTCTGTTGGTAAAGATGGGCGGCGTTCTGCCGCCCGTTATCTCTGTTATA
1361446	+	1238.54	internal,	I:gene_id "G6645"; gene_name "puuD";	GATCTTCTGAGCATGGCGATAATTAATGCCGCACTCGAAAGGCGCATCCCCATTTTCGCCA
1368782	+	1942.64	primary,	P:gene_id "EG10776"; gene_name "pspA";	GCAAGACAATCAATAATAACATCCAGGCGGCGTCCGAACGCGCCGCCGCTCATCGTCTAAG
1370041	+	7596.59	primary,	P:gene_id "EG10780"; gene_name "pspE";	GGTCAAAGGTTAAAAGAATTCACCATGAGCGGCGCTTATGCGCCGTTTTTTTTTCTGTCAC
1388306	-	463168	internal, antisense,	I:gene_id "G6660"; gene_name "tpx";,A:gene_id "EG11042"; gene_name "tyrR";	AATCACCACCGAGCCGGATTACGAAGCAGCTCTGGCTGTACTGAAAGCATAATTTAATATG
1411575	+	1179.14	antisense,	A:gene_id "G6675"; gene_name "ttcA";	CCCCCAGTTCCGTTGCGGTACGATAAAGGATACCGCGACGAAGGCGAGAACACAGTGAGCA
1417486	+	185664	antisense,	A:gene_id "EG10813"; gene_name "racC";	TCTTGCCGGATACACACTGTTCATAGCCTGCGCCATACGCAGGCTATTTCTTTCAGATTTC
1419679	-	69559.9	orphan		TTATTTAACCCCCCCATCACTTTCTGCTGTCGCCATCACCTATTAGGTTACGCTCAAAACA
1420148	-	148214	internal,	I:gene_id "G6680"; gene_name "racR";	TTAACAAAAAAATCGCATCGGGATCCGTCAAATCAAAGGCGGAGGTCGCACGCCACTTTAA
1434540	-	44932.8	orphan		GTCTCTGCATAAGATAGTTTGCAGTTGCCACTTCAGCTTGCGCCATAAACCGCCTGATTTT
1435153	-	112770	primary,	P:gene_id "G6699"; gene_name "uspF";	CGTGCTGGTTGTGCGCTGACACTAACGCCCGCACATTGCTGCGGGCTTTTTGATTCATTTC
1463435	-	26321.4	antisense,	A:gene_id "G6719"; gene_name "paaK";	TCGACTTCTGGCCCTGGCGCTTTACCCCACCAGGGCCAGACGATACGTCAGGCACCAACAA
1489709	+	12007.9	primary,	P:gene_id "EG10035"; gene_name "aldA";	TTTACAGTCTTAATGAGTGAAAGAGGCGGAGGTTTTTTCCTCCGCCTGTGCGCGTCAGAGT
1491443	-	1254845	primary, antisense,	P:gene_id "G0-10592"; gene_name "rydC";,A:gene_id "EG10172"; gene_name "cybB";	CCCGTATTCTTCGCCTGTACCACGGGTCGGTTTTAGTACAGGCGTTTTCTTTAAATATCCT
1492144	+	1722.06	internal, antisense,	I:gene_id "G0-9611"; gene_name "sokB";,A:gene_id "G6736"; gene_name "mokB";	CGGGTAAGAGGCTAAGATCTGAATTGCTAGGTTCATTCGTTGGCCTCGGTTGATAGAAATA
1492156	-	69277.4	antisense,	A:gene_id "G0-9611"; gene_name "sokB";	ACTTTCTGTTTTCAGGCTAACCGGGAATCAGAAAGACGAAGGCCCCGACCGATATTTCTAT
1504927	+	2583.1	antisense,	A:gene_id "G6744"; gene_name "ydcO";	ATCCACGTCCTTCAGGGCGTGGAGGATGTCAATATCGGTTTCTGTCAGCGATTAAATTCAA
1506031	-	25756.6	internal,	I:gene_id "G6744"; gene_name "ydcO";	TATGCGTCTGTTTTCTATTCCTCCACCCACGCTACTGGCGGGGTTTCTGGCGGTATTAATT
1517039	-	75264.6	antisense,	A:gene_id "G6755"; gene_name "patD";	TTTGCACGCAGCACGTACTGTCAGAGAAATCAGTGCTCTGACAGTACGCAAGATCATCTCA
1517357	+	848.319	orphan		CAAACTGGTGAAAAAACTTGATGCACGTCAAAAAATGACGCATATTTGCGCGCGTTTTATT
1517918	+	17670.2	primary, antisense,	P:gene_id "G6757"; gene_name "ydcY";,A:gene_id "G6758"; gene_name "ydcZ";	GCACCATCCTCTGATTAAAATGAGCGTCTGGCTACCAACCAGGCGCCAACCACAAGTAAAA
1524476	+	1493.02	antisense,	A:gene_id "G6764"; gene_name "ansP";	GGCACTTTCGTCAGTAATCTGAATTTGCCCGGCACGTAGCCGGGCAATTTTGCAATTAACT
1555765	-	30049.4	orphan		TCAGTCCTCAATGACGATTAAACACCATTGCCTGCGCAATGGTGTTTTTGTTTTTATCTGC
1611790	-	26321.4	internal,	I:gene_id "G6808"; gene_name "dgcF";	GTTCAGTGAGCAATTCTCAACGGGCGTGTTGATCGTGCCTTGTATGCTGACGTTGGCTATT
1620240	+	945.857	primary, antisense,	P:gene_id "EG11599"; gene_name "marB";,A:gene_id "EG11639"; gene_name "eamA";	AATCAACACGCTATGTAGTTTGTTCTGGCCCCGACATCTCGGGGCTTATTAACTTCCCACC
1622804	+	2595.81	antisense,	A:gene_id "G0-10671"; gene_name "mgrR";	ATCCCTCACCTAACCGGCCCCTTGTTACAGTTGTGTACAAGGGGCCTGATTTTTATGACGG
1622824	-	2434090	internal,	I:gene_id "G0-10671"; gene_name "mgrR";	GCAAAACACAAATCTATCCATGCAAGCATTCACCGCCGGTTTACTGGCGGTTTTTTTTCGC
1628294	+	1654.19	primary,	P:gene_id "EG12345"; gene_name "ydfG";	TGAATGTCCACCGTCAGTAATTTTTATACCCGGCGTAACTGCCGGGTTATTGCTTGTCACA
1628455	+	856.794	internal,	I:gene_id "G6814"; gene_name "ydfH";	TCGTATTCTTCGTCGCGACATTGTCCATTGCCTGATTGCTCCAGGCACACCGTTGTCGGAA
1632571	+	3282.95	orphan		TTACCAGCCAATCGCAGCACGTTCTTGCATAAGGTGTGTCTGCGGTTTTTCAACTATTCAG
1632744	+	1026.45	orphan		AATCCGTGTAGAGTCTCTACATAAGATAGTTTGCAGTTGCCGCTTCAGCTTGCGCCATAAA
1637558	-	254206	orphan		TGTATTCAATAATAAAATTTATCCATAAACCTCGTTTTTACGGGGTTTTGTTATATTTGAA
1638981	+	797.399	antisense,	A:gene_id "G6826"; gene_name "ydfP";	TATCTTACCCTTAAGATTTCAGGAATTTTGGCTCATGGAAGAGTCCTTTTTATTTAAATTT
1641060	+	937.381	orphan		TAATAATATATTTAAAGCAGATAATAAAAAACCCGCCTGAGCGGGTTTGAGATTGTGGTGC
1641226	-	604404	orphan		GAGTAGTGAATATTGGATCTCTTTAATAAAAAGTAAGGAGGTCCAATACATGAAACAATGG
1641634	-	56963.9	orphan		AGTTTACTAAAGCAGTTCTCATTTCAGGTGTTATTCACTTATTCCTTCTTTGAGTCTCTCC
1642356	-	103591	orphan		TACCCGACGTTAAGAAAAAGTAGAAAACCCGCTGATGAGCGGGTTTTGTGCTTTAAATGGG
1644572	-	64702.3	orphan		ACTCCCGCTGAGTAACACCGTGCCACCGGAGAAAACCGATGGCACGCAACGCAAAATATTA
1645082	-	44932.8	primary,	P:gene_id "EG11130"; gene_name "hokD";	AACCTGAGGAGTAAGAGACCCGGCGGGGGAGAAATCCCTCGCCACCTCTGATGTGGCAGGC
1646747	-	30049.4	antisense,	A:gene_id "G6833"; gene_name "flxA";	CTTTAAAGAAAAGGCTGATGGCGAAAAGTGGCCCGATGAGGGCCACAATACGGCTGTCACT
1647051	-	214921	orphan		TTTCGGGTGGTTTGTTACTTGTTTTACCGGGGATATGCCAGAAACGCGCTGAGTCAGTCTG
1648368	+	4703.86	primary,	P:gene_id "EG10226"; gene_name "dicA";	CGTCAGCGGACAAATAAAAGATAACATCATCAATGAGTTATCTTTTACCACATCAATTATG
1649369	+	5399.48	orphan		CGGGTTGTCAGGTTGACCATACGCTTAAGTGACAACCCCGCTGCAACGCCCTCTGTTATCA
1649584	+	1034.92	orphan		TTAATTGTTAACTGGTTAACGTCACCTGGAGGCACCAGGCACTGCATCACAAAATTCATTG
1673496	-	30331.8	internal,	I:gene_id "G6858"; gene_name "mdtJ";	TGAATTAAGCGAAAATTAAAATAATTCTCTTGCAGGAGAAGGACAATGTATATTTATTGGA
1673726	-	48660.8	orphan		GTTCAACTACCGAGGACAATTATCATCCGCGATGACGAGAAGCAACACTGCGGATAATTGT
1697041	-	36912.2	internal,	I:gene_id "G6867"; gene_name "uidR";	CGCGGTAAACTAGTTATTCACGCTAACTATAATGGTTTAATGATGGATAACATGCAGACTG
1704702	+	945.857	primary,	P:gene_id "G0-9561"; gene_name "blr";	GAGTGCTTCGGTACAACACAAGTAAGCTCTGCACTTGTGGAGCGACATGCTGCCCGTCCGG
1715904	-	41204.8	primary,	P:gene_id "EG11043"; gene_name "tyrS";	GAAATAATGCATTAAGTGGAAAGGGGGAGTGAGAAATCACTCCCCCTGGTTTTTATACAGG
1717931	-	26039	internal,	I:gene_id "EG11487"; gene_name "pdxH";	AATCGCGCATCTGCGCCGTGAATACACCAAAGGCGGGTTACGCCGCCGCGATCTTCCCGCC
1719858	+	950.097	orphan		CATATGCCATATACTTTGACCATGAGGGATGCTTGCGTGGCGTTTCATGGTGAACAGGAGA
1720347	-	45497.7	primary, antisense,	P:gene_id "G6882"; gene_name "slyA";,A:gene_id "G6881"; gene_name "slyB";	AAGGGTGAAATGAAGGGGGCGTGTGGTCAGTAACCTGACCACACGCAAACTTATTTAGCGC
1720384	+	6858.52	primary, antisense,	P:gene_id "G6881"; gene_name "slyB";,A:gene_id "G6882"; gene_name "slyA";	TCCGCGCTAAATAAGTTTGCGTGTGGTCAGGTTACTGACCACACGCCCCCTTCATTTCACC
1728279	+	2566.14	primary,	P:gene_id "G6891"; gene_name "gloA";	CGGTCTGGGCAACTAATCTCCTGCCGGGCGTGAACTCATCGCGCCCGCATCTTTACTGCAT
1733707	-	805628	primary, antisense,	P:gene_id "EG12181"; gene_name "grxD";,A:gene_id "EG11548"; gene_name "lhr";	ATAATCCGTCCTGCAATACTGACGGATGCGAACGGGCATCCGTCAGTCCTTTCTCTATCCC
1734542	+	784.683	internal,	I:gene_id "G6892"; gene_name "mepH";	CCTTTAACGCCTATGGCCCATGCTTCAAAGCAAGCCAGGGAGAGTTCTGCTACCACTCATA
1736114	+	23167.3	antisense,	A:gene_id "G6893"; gene_name "ydhP";	ATCGCACGTTGTCAGCAACTGTAACGCAGAAGGTTATCCTTCTGCGTTTTTGTTTAATTAG
1737422	-	655382	primary,	P:gene_id "G0-10594"; gene_name "ynhF";	CTGCCGCGCTGCACTGATTTCCTCTCGAGGGAGCGCGTTCTCCCTCGCATCTCCTTCCTGT
1737833	+	2035.93	orphan		AAGGCAAACGTTTACCTTGCGATTTTGCAGGAGCTGAAGTTAGGGTCTGGAGTGAAATGGA
1737952	+	1013.73	internal,	I:gene_id "EG10800"; gene_name "purR";	ACGTGATCAACAAAACACGTTTCGTCGCTGAAGAAACGCGCAACGCCGTGTGGGCAGCGAT
1738907	+	1560.89	primary, antisense,	P:gene_id "EG10800"; gene_name "purR";,A:gene_id "EG12140"; gene_name "ydhB";	CTATCGTCGTTAATCACCCGTTGCGGGAGTCTCTTCCGGCTCCCGCAGCCACTCCTTATTC
1741259	+	6103.57	orphan		AAAGCTACGATAAATATTATGTTTTTACGGGGACAGGATCGTTCCCGACTCACTATGGATA
1742568	-	156856	primary, antisense,	P:gene_id "EG11406"; gene_name "ribC";,A:gene_id "EG11531"; gene_name "cfa";	CCAGGCACAGAAGCCTGATCTGAAATCGCCCCCGGAGAGGGGGCGATAGAATAGCCTTTAG
1744868	+	933.144	primary, antisense,	P:gene_id "EG12400"; gene_name "mdtK";,A:gene_id "G6894"; gene_name "ydhQ";	AGCATCCCGCTAATAAAGACAAGGCGCAACCTTCACGGGTTGCGCCTGTATTTTTACGCAG
1746511	+	10847650	primary,	P:gene_id "EG30111"; gene_name "valV";	ACCACCTTGACATGGTGGGGGTCGTTGGTTCGAGTCCAATTGAACGCACCATCCTGCGTCC
1747040	+	2964.84	primary,	P:gene_id "G6895"; gene_name "ydhR";	GGCAAAACTCGCCTGACAGAATTTAATCAAGGGCGGTTAGCGCCCTTTTCATCCCTGTCTG
1754895	-	44650.4	primary,	P:gene_id "G6903"; gene_name "ydhZ";	CACTGGTAAAATGACCATTCAGGATGAGGCGGTAAGCTTCATCCTGATATTCTTGCTTCAG
1757702	+	175710	primary, antisense,	P:gene_id "EG10544"; gene_name "lpp";,A:gene_id "G6904"; gene_name "ldtE";	AAGTAATAGTACCTGTGAAGTGAAAAATGGCGCACATTGTGCGCCATTTTTTTTGTCTGCC
1764708	-	2174030	primary,	P:gene_id "G0-8876"; gene_name "rydB";	GAGCTAAGCCACTGAGAGTGCCGGAGATAAGCGCCGGATGGGGTAGAAACCCTTAAGCCTG
1791935	-	32901.8	internal,	I:gene_id "G6925"; gene_name "ydiV";	TTGCTATTTCCTGCCGATAAGAGACAACCAGCAAGTCCTTGTCGGCGTTGAGTTAATTACC
1795230	-	29767	primary,	P:gene_id "EG10440"; gene_name "ihfA";	CGAAAACGCTTCGCCCAAAGACGAGTAATCTGATCTAACTAAAAAGGCCGCTCTGCGGCCT
1798987	-	58093.6	orphan		CACAGCCCGGGACCAAAATGGCAAGTAAAATAGCCTGATGGGATAGGCTCTAAGTCCAACG
1799251	-	110736	internal,	I:gene_id "EG11272"; gene_name "pheM";	TTTTGAAGAGTACCAAAAGGTAACGCAAGCAATGAATGCTGCTATTTTCCGCTTCTTTTTT
1799356	-	2213960	primary,	P:gene_id "EG10881"; gene_name "rplT";	CAGCTCTGGCATAAGCCAGTTGAAAGAGGGAGCTAGTCTCCCTCTTTTCGTTTCAACGCCA
1799713	-	45780.1	internal,	I:gene_id "EG10881"; gene_name "rplT";	ACAGGAGAGCACATATGGCTCGCGTAAAACGTGGTGTTATTGCACGTGCACGTCACAAGAA
1800036	-	515922	orphan		GTAGCACTGTCTGTGGAGCCTTCGGGCTTCACAGGCTTTGTTCGCCTTTGTTTCGTTTATT
1800228	-	135420	internal,	I:gene_id "EG10506"; gene_name "infC";	GGTGATAAAGCCAAAATCACGCTGCGTTTCCGCGGTCGTGAGATGGCGCACCAGCAAATCG
1802639	-	52671.2	orphan		TGATTGCGAACCAATTTAGCATTTGTTGGCTAGATGGTTTCGCAATGAACTGTTAATAAAC
1823539	+	1009.49	internal,	I:gene_id "G6937"; gene_name "cho";	TAGATAACCAGCATTCGGAGTCAACAGTGGTACGGCGTTTAACTTCTCCGCGGCTCGAATT
1825060	-	133952	orphan		GTCTTGTCCACTACCTTGCAGTAATGCGGTGGACAGGATCGGCGGTTTTCTTTTCTCTTCT
1842451	+	1022.21	internal,	I:gene_id "EG10372"; gene_name "gdhA";	CTCAACCATGTCCAAAAGCGCGACCCGAATCAAACCGAGTTCGCGCAAGCCGTTCGTGAAG
1846801	-	25756.6	internal,	I:gene_id "EG11014"; gene_name "topB";	TGGTGACCTGGTGTATCGGTCACCTGCTTGAGCAGGCGCAGCCAGACGCCTACGACAGCCG
1854008	-	29767	orphan		CTTGAAATAAAATGATGATAAAGATGCGGCAAGTGAATTTGCCGCAATTGCTACCTTTTTA
1861655	-	51795.6	primary,	P:gene_id "G6964"; gene_name "yeaC";	GTAAGTGGTTCATCCCCTTTTTGCCTCGGCTATGAAGGGGATAGCCAACAATGACCCCACG
1862707	+	1247.02	orphan		TAGGCACAGGATTGATTTGTCGCAATGATTGACACGATTCCGCTTGACGCTGCGTAAGGTT
1863815	+	1319.13	primary,	P:gene_id "EG10367"; gene_name "gapA";	AAGTTGAGATGACACTGTGATCTAAAAAGAGCGACTTCGGTCGCTCTTTTTTTTACCTGAT
1865667	-	47785.2	orphan		CTTTCCAGGGCATTTTGTGCATAAAAACAGGGCGTCACGCCCTGTTTTGCATTACGGTGGT
1878965	-	34342.1	primary, antisense,	P:gene_id "G6981"; gene_name "yeaQ";,A:gene_id "G0-10648"; gene_name "yoaJ";	AAAAGTTAACGCTTAAATTGCACAAAGGCTGCACACAGGCAGCCTTTGCTATTTTTTAGAG
1888017	-	51795.6	primary,	P:gene_id "G0-9384"; gene_name "sroD";,gene_id "EG11530"; gene_name "fadD";	AGCCTGAGCGTTAAGTCAGTCGTCAGACGCCGGTTAATCCGGCGTTTTTTTTGACGCCCAC
1893787	+	6544.72	orphan		ACGATAATTTATCGATAATACTGGTCGGTTTTACATAAATCGACCAGAGAATAAGATATTA
1894457	-	94186.7	antisense,	A:gene_id "G6994"; gene_name "yoaC";	TGATTGTGAGAAAAAGGACGCTTTTTATATGTGATTAAAAGCGTCCTGACCCATTTATGCT
1894498	+	3053.91	orphan		GCATAAATGGGTCAGGACGCTTTTAATCACATATAAAAAGCGTCCTTTTTCTCACAATCAA
1896275	+	3668.94	internal,	I:gene_id "EG12693"; gene_name "nudL";	GCCCGCAAATTAACCGGGAAACCCTAAATCATCGTCAGGCTGCTGTGTTAATCCCCATCGT
1896867	+	865.27	orphan		TTTTGATTAGTTTAATTCATGTGAATAGTTAAGCCAGTCGCCGCGTTCCCTCTTACACTAT
1904785	+	3032.72	primary,	P:gene_id "EG10569"; gene_name "manZ";	CTGGGACTGTAAGACTGTTGTACACTACCGGGGCCTTTTGGCCCCGTTTTTTTATCTGGAG
1906214	-	48943.2	primary, antisense,	P:gene_id "EG12207"; gene_name "rlmA";,A:gene_id "G6999"; gene_name "mntP";	AGCGTTCTTATTAACCGTGGAAGTGCGTCCAGAGGATCTGGACGCCGATGCCGATCAGCAC
1907153	-	9211040	orphan		TGAATACGCTTCAATCTCGCTATAAAGCCTCGTCGAATGCGAGGCTTTTTACTATGCTTTA
1907479	-	198936	internal,	I:gene_id "G7000"; gene_name "yobF";	TGCCGAGCCTTATATTGGTGCCTCATGCAGTAATGTGTCAGTTTTATCTATGTTATGCCTG
1908212	-	115058	primary,	P:gene_id "G7001"; gene_name "yebO";	AATCCTTCCTCAATCTTGAGTAACCCCGTCGTTGAAGGGTTACTCAATTCATCCTGATTAT
1908368	-	24909.4	internal,	I:gene_id "G7001"; gene_name "yebO";	AACTGCTTGAGGCGTTGCTGGATCAGCAAAAACGTCAAAATGCACTGTTACGTCGTTTGTG
1908477	-	40640.1	internal,	I:gene_id "G7001"; gene_name "yebO";	GGCGTGATGAACATTGCGTCTTTGGTTGTATCGGTGGTGGTTCTTCTTATCGGGCTCATCT
1912733	-	23469	primary,	P:gene_id "EG10760"; gene_name "prc";	CGCTCCCGTCAAGTAATATCAATCAGGCACAAGAAATTGTGCCTGATTTTTTAACAGCGAC
1915441	-	44085.7	internal,	I:gene_id "EG12866"; gene_name "proQ";	CGTTTCTGGCCGAACGTTTTCCCCACTGTTTCAGTGCGGAAGGTGAAGCGCGTCCGCTGAA
1915559	-	103591	orphan		ACTGATAGCGTCATTATAATGACGCCTGTTCATGCCTGCGCTTGTTGGCTACGTCCGTTGT
1923104	-	119068	primary, antisense,	P:gene_id "G0-8883"; gene_name "sdsR";,A:gene_id "G0-8865"; gene_name "ryeA";	CAAGAGCCATTTCCCTGGACCGAATACAGGAATCGTGTTCGGTCTCTTTTTATCTGTTAAA
1923170	+	2120.76	internal, antisense,	I:gene_id "G0-8865"; gene_name "ryeA";,A:gene_id "G0-8883"; gene_name "sdsR";	CGATTCCTGTATTCGGTCCAGGGAAATGGCTCTTGGGAGAGAGCCGTGCGCTAAAAGTTGG
1930402	-	26039	orphan		ACTTGCGCTCCTGACAATTTGTACCATGCTTTCTCCTGAATCATTGTGCTATGGAGAAAAA
1939223	+	933.144	antisense,	A:gene_id "EG10614"; gene_name "lpxM";	AAACTTGAACTTATCATCAGGCGAAGGCCTCTCCTCGCGAGAGGCTTTTTTATTTGATGGG
1942002	-	176314	internal,	I:gene_id "G7017"; gene_name "znuA";	AAGGATTTTGAGGCACAATTAGCCTCAACCGAAACGCAGGTTGGTAACGAGCTCGCGCCGC
1942702	+	933.144	internal,	I:gene_id "G7018"; gene_name "znuC";	TAAAATTAACATGACAAGTCTGGTTTCCCTGGAAAATGTCTCGGTTTCTTTTGGCCAACGC
1946817	-	26039	primary, antisense,	P:gene_id "EG10925"; gene_name "ruvC";,A:gene_id "EG11136"; gene_name "yebB";	GCGACTGCGTTAAGTTATACCGCCTCGGTCAGTTCCGGCTGAGGCGTTTCCACTCCCTCCG
1948475	-	52078.1	internal,	I:gene_id "EG11138"; gene_name "nudB";	GCAGTCGGTAACCGGCAGCGTGGAAGAGGGTGAAACCGCGCCGCAAGCTGCCATGCGCGAA
1952728	+	788.921	internal,	I:gene_id "G7020"; gene_name "cmoA";	TTCTTTTTCCCGGATTTTTACGTTATGTCTCACCGCGACACGCTATTTTCTGCCCCTATCG
1954572	+	861.032	antisense,	A:gene_id "G7022"; gene_name "torZ";	CAGGCAGCTTTACGTTTGCATAACCTCAGCGCCCGTTTCCGGGCGCTATTCACGTCTTACG
1985131	+	1565.13	antisense,	A:gene_id "EG10057"; gene_name "araF";	GAATCACTGGTCGTTCACACCCCCTCTGCATCATGCAGAGGGGAATTTTTCCGGCAAATTA
1986856	+	1255.49	orphan		TCAGAATTGACTCCACGATCACATTTCGGACCGGCAGAAAGGAATTATTCTGCAAACAGTA
1987429	-	22904.2	antisense,	A:gene_id "G7033"; gene_name "ftnB";	CAGCGGTTTCTCAAAACCTTCATCGGCGCAATGCATTAGCGCCGATGATGATCAATGCAGC
1989247	+	2812.14	primary, antisense,	P:gene_id "EG10921"; gene_name "ftnA";,A:gene_id "G7036"; gene_name "yecH";	TCGACACACAAAACTAATGCTCTCCGGCGGCAGGTTTACTGCCGCCGTTTCAAATCAGTGA
1991914	-	718016000	primary,	P:gene_id "G7991"; gene_name "cysT";	TAGCGGATTGCAAATCCGTCTAGTCCGGTTCGACTCCGGAACGCGCCTCCACTTTCTTCCC
2007645	-	42645.2	primary, antisense,	P:gene_id "EG11659"; gene_name "yedD";,A:gene_id "EG11387"; gene_name "amyA";	ACCGACGCCACTGCCGTAATGAAATCTCCCCGGCTTGCCGCCGGGGATGAATTTAAATCAC
2024594	-	57246.3	primary, antisense,	P:gene_id "G7045"; gene_name "dsrB";,A:gene_id "EG10820"; gene_name "rcsA";	AGCAGAGTAATCTTATTCAGCCTGACTGGTGGGAAACCACCAGTCAGAATGTGTTAGCGCA
2025229	-	603756	internal, antisense,	I:gene_id "G7047"; gene_name "dsrA";,A:gene_id "G7046"; gene_name "yodD";	AAGTGCTTCTTGCTTAAGCAAGTTTCATCCCGACCCCCTCAGGGTCGGGATTTTTTTATTG
2043468	-	57630050	primary,	P:gene_id "EG30094"; gene_name "serU";	ACCGGAGTAGGGGCAACTCTACCGGGGGTTCAAATCCCCCTCTCTCCGCCACTTTATCAAT
2043721	+	1247.02	internal,	I:gene_id "G7063"; gene_name "mtfA";	AGTACAAGAATCAGCACATCAAACTGCCCTTCCCTGGCAGGAAGCACTATCGATCCCCCTT
2044735	+	9017.5	orphan		AACGGATAGCGGGTTTTTAACATCTTAAGCGCCCTCGACCTTTATGGTTGAGGGCGTTTTG
2053655	+	937.381	internal,	I:gene_id "G7067"; gene_name "shiA";	CATACTAATTATAAAAAGACAGTACAAACAGGATCATTATGGACTCCACGCTCATCTCCAC
2058025	-	756431	primary,	P:gene_id "G7069"; gene_name "asnW";	CGGACTGTTAATCCGTATGTCACTGGTTCGAGTCCAGTCAGAGGAGCCAAATTTTAGTTTT
2059964	+	7829.88	primary, antisense,	P:gene_id "EG30021"; gene_name "asnU";,A:gene_id "G7071"; gene_name "cbl";	GTCAGAGGAGCCAAATTCCTGAAAAGCCCGCTTTTATAGCGGGATTTTTGCTATATCTGAT
2068394	-	122542	orphan		CGGTCTCTGGTTGTATCCACGGACCGCACTCTTGACATAAGAGTGCGGTCCGTGGAAAACG
2068762	+	784.683	internal,	I:gene_id "G7075"; gene_name "yoeA";	AACCGCAACTTCTTCAGAAACAAAAATCAGCAACGAAGAGACGCTCGTCGTGACCACGAAT
2074672	-	24033.8	antisense,	A:gene_id "G7080"; gene_name "flu";	GATCCGTTGCGCCGGTCCGGGTCCCGGTCATGATGACCGGGACCACAGAGAGGCGATGGTT
2078989	-	205828	primary,	P:gene_id "G7087"; gene_name "yeeX";	CGAAGTAATTCCCGTTTTATTCAATGAGGGTTGCCCGGCAACCCTCATTGCTCATTGATTC
2090132	+	11791.5	orphan		CTTCCAGTGGTGCATGAACGCATGAGAAAGCCCCCGGAAGATCACCTTCCGGGGGCTTTTT
2097270	-	72129.9	antisense,	A:gene_id "EG10451"; gene_name "hisI";	TCTTTTCGGTTTTAAAGAAAAAGGGCAGGGTGGTGACACCTTGCCCGTTTTTTTGCCGGAT
2098243	-	24033.8	internal,	I:gene_id "G7090"; gene_name "wzzB";	AGAAAATAATAATGTTTCTGGGCAAAACCATGACCCGGAACAGATTGATTTGATTGATTTA
2113139	-	27479.3	orphan		CATAGGCATGCATGCAGTGCTCTGGTAGCTGTAAAGCCAGGGGCGGTAGCGTGCATTAATA
2113346	-	82720.6	orphan		TATAACGGCAGTGAAAATTCGCAGCAAAAGTAATTTGTTGCGAATCTTCCTGCCGTTGTTT
2139566	-	42362.8	orphan		CAAGCCGGTGAACGTGCCAGGGTGGCTCAATCTCCACCACCCTGGCAACCCGGGCTCCCGG
2139607	+	2740.03	orphan		CGGGAGCCCGGGTTGCCAGGGTGGTGGAGATTGAGCCACCCTGGCACGTTCACCGGCTTGA
2153420	+	133651	internal, antisense,	I:gene_id "G0-8884"; gene_name "sibA";,A:gene_id "G0-10633"; gene_name "ibsA";	CACTAAGAGTATCACCAGTATGATGACGTGCTTCATCATAACCCTTTCCTTATTAAAAGCC
2153749	+	487446	internal, antisense,	I:gene_id "G0-8885"; gene_name "sibB";,A:gene_id "G0-10632"; gene_name "ibsB";	TATGACTAAGAGCACCACGATGATGAGTAGCTTCATCATGACCCTTTCCTTATTTATGGCC
2153897	+	788.921	orphan		CGCGTAGATAAAATAGTTTCCTGTGTTATTACTGGATGCGTGCTCGCAAATGTGCCCGTCA
2167199	+	112316	internal,	I:gene_id "G0-8878"; gene_name "cyaR";	CAGGAACCACCTCCTTAGCCTGTGTAATCTCCCTTACACGGGCTTATTTTTTACGCGTAAT
2171800	-	220682	primary,	P:gene_id "EG12417"; gene_name "gatD";	GTGTTGCTCATTCCCTGAAACCGCGGGCCAGCGTGATGCTGGCCCGGTATTGTGCAAAACA
2172887	-	192045	primary,	P:gene_id "EG12416"; gene_name "gatC";	TCGTTCTCGCAGAATAATTTTTACCTGAGGGGGAGGTTATCCCCCTTAACAATCAGGAGTT
2173818	-	22904.2	internal,	I:gene_id "EG12416"; gene_name "gatC";	TCTGGCAACCGGTTCATGGATGATAGGGATGGCAGGTGTGGTAATTCACGCGGCGTTTGTT
2174279	-	24909.4	primary,	P:gene_id "EG12415"; gene_name "gatB";	GGTATCGAAGCATTACAAAATAAAATTCTGACTATCTTACAGGGGTGACCTATGTTTTCAG
2176438	-	69842.2	internal,	I:gene_id "EG12419"; gene_name "gatY";	CTCGCAGGCGTTAAAAAATTACCTGACCGAGCACCCTGAAGCGACCGATCCCCGGGATTAT
2177079	-	128190	internal,	I:gene_id "EG12419"; gene_name "gatY";	CACAATCTCGAAACGATGCAAGTGGTGGTAGAAACCGCTGCCAACCTGCATGCGCCGGTCA
2185342	-	367794	orphan		ATACCCGTATCACCTGATCTGGATAATGCCAGCGTAGGGAAGTCACGGACCACCAGGTCAT
2192992	-	26886.2	orphan		TGGTTATTCTTCATACACCGCAGAGATGTTACATTGATGCGGTGTATTAGTTTTTGCCGCA
2204446	+	1111.27	orphan		TCGTTCGTTGGAACACGATGTTGCACAGGCTGTGGTGTTAGGCCTGAAAATAGTAAATAAA
2211688	-	48943.2	primary, antisense,	P:gene_id "EG12005"; gene_name "yehS";,A:gene_id "EG12004"; gene_name "yehR";	GAAAAAAGGCTAAAAAATTGGCGGTCATGTTTAGAGCATGACCGCCAACCGATTATTTCAC
2215813	+	861.032	primary, antisense,	P:gene_id "G0-10459"; gene_name "yohO";,A:gene_id "EG12009"; gene_name "yehW";	AAGCGCCTGCACCAGCCTTTCAAACAGGCGGTCTGCGATGATCGCCGCCAGTGCCACCAGT
2230706	+	861.032	internal,	I:gene_id "EG12023"; gene_name "yohJ";	TTTACGCGCTTTCGTCCTGATTTATGCCTGCCTGTATGCAGGCATTTTCATTGCTTCCCTG
2236360	-	23751.4	antisense,	A:gene_id "EG11289"; gene_name "preA";	CAGACAACCCACACATTTCTCGGTATTACAATGCGGTGTGCGGGTTTTCTCGCTCCATTCC
2236530	-	51513.2	antisense,	A:gene_id "EG11289"; gene_name "preA";	TTTGTATGGTTTTGTAGGCCGGATAAGGCGTTCAAGCCGCATCCGGCGACAGGAACCAAAT
2237260	-	38352.5	internal,	I:gene_id "EG10594"; gene_name "mglC";	CAACTCGCTCTATTACGACTTTGTCGGGGCGTCGCCAATTTCTGGTTTTGACAGTGGCTTC
2238827	-	24033.8	internal,	I:gene_id "EG10592"; gene_name "mglA";	ATATTGATATCGATCCGCGTGCGCGCGTCGGCACATTATCCGTTTCGCAAATGCAGATGAT
2239314	-	147960	primary,	P:gene_id "EG10593"; gene_name "mglB";	TTCAGCAAGAAATAAGACTGATTGGGCGCAGTCTATTACTGCGCCCTTATTGTATGGCCAA
2240498	-	92181.7	orphan		GTATGTAACAGTGAATAATCACTTTTGCCGAGGTAACAGCGTCATAACAACAATTAAAGCC
2243669	-	25756.6	orphan		GTAAATCAGCTTAATAACTTTGCCCCCACGCAGGGCGGAGGCGTCACACCTGCAGGAGAAA
2244773	+	1085.84	primary, antisense,	P:gene_id "EG12026"; gene_name "yeiG";,A:gene_id "EG10155"; gene_name "cirA";	CATGCGCAGTATTTACTGAAGTGAAAGTCCGCCCGGTTCGCCGGGCATCTTCTCATCAGAA
2263539	-	218310	orphan		GTTTCAGCGCGATCTTGTCTTTAACCCTAAGCCAGGTTGGCGCTTTTTTTCTCATAGAGGC
2265251	-	66368.4	internal,	I:gene_id "G0-10511"; gene_name "yeiW";	CAACGTATGGAATGCCGTCCGGGTTGCGGGGCGTGTTGCACTGCCCCTTCAATTTCCAGCC
2269627	+	1323.37	orphan		ATTAACATCATCAGGGTTATTTTTATAGTGAGGATAATCCTGATGATGCGCACCGTGCTTT
2269975	+	1552.41	orphan		GCATTTTTTTATAACGATATTTGTCGTTAAGGACTTCAAGGGAAAACAAACAACATGGTCA
2270136	+	10107.6	internal,	I:gene_id "G7147"; gene_name "mepS";	GCATCCTGAGACACGTGCAGTGGGTAGTGAAACATCATCACTGCAAGCTTCTCAGGATGAA
2270620	+	10578.3	orphan		GGCTATCCTGACGAGTTAACTGAAAGCACTGCTTAGGCAGTGCTTTTTTGTTTTCATTCAT
2277685	-	212916	antisense,	A:gene_id "EG12041"; gene_name "yejF";	TAGGCCAGTTGATGCTTTTGTTGCAATGATTTCAATAGCGTCAATATTTGCGCCTGTACCG
2278567	+	1085.84	antisense,	A:gene_id "EG11419"; gene_name "bcr";	GGTTGACATGCATCAACAAAGGAAGCCTTTTAGCTTCCTCGTTGTGCAATAGATCACCGTT
2280440	-	36912.2	internal,	I:gene_id "EG12044"; gene_name "rsuA";	CACACACATGCGACTTGATAAATTTATCGCACAGCAACTCGGCGTTAGCCGTGCTATTGCC
2282535	+	865.27	internal,	I:gene_id "EG10885"; gene_name "rplY";	CCTGTAGCAGGATTAATTTAAGAGAGAAAGAAATGTTTACTATCAACGCAGAAGTACGTAA
2282580	+	865.27	internal,	I:gene_id "EG10885"; gene_name "rplY";	ACGCAGAAGTACGTAAAGAGCAGGGTAAGGGTGCGAGCCGCCGCCTGCGTGCCGCTAACAA
2284559	+	954.333	internal,	I:gene_id "EG12049"; gene_name "yejM";	CAACGCTTGCTGGTCGCATTTATTCCTACGTAAGCATTATCGGCCATTTCAGCTTCCTGGT
2286287	+	2986635	primary,	P:gene_id "EG30067"; gene_name "proL";	ACCGTCATGGGGTGTCGGGGGTCGGAGGTTCAAATCCTCTCGTGCCGACCAAAAATCCCAA
2291359	+	1883.23	antisense,	A:gene_id "EG12052"; gene_name "ccmH";	CGCACTTTGTCAACAGTCTAGCCCGATGGCATCACCATCGGGCCTCTTTTTATTTACTCTC
2311605	-	888489	primary,	P:gene_id "EG10670"; gene_name "ompC";	CCAGTTCTAATCTCGATTGATATCGAACAAAGGGCCTGCGGGCCCTTTTTTCATTGTTTTC
2311991	-	24033.8	internal,	I:gene_id "EG10670"; gene_name "ompC";	GACCGTGCTGAAACCTACACTGGTGGTCTGAAATACGACGCTAACAACATCTACCTGGCTG
2312385	-	23469	internal,	I:gene_id "EG10670"; gene_name "ompC";	TGTGGGTTCTTTCGACTACGGTCGTAACTACGGCGTTGTTTATGACGTAACTTCCTGGACC
2312669	-	42927.7	internal,	I:gene_id "EG10670"; gene_name "ompC";	CCAGCTCTGCTGGTAGCAGGCGCAGCAAACGCTGCTGAAGTTTACAACAAAGACGGCAACA
2313176	+	3355.07	primary,	P:gene_id "EG30063"; gene_name "micF";	AATGTCTGTTTACCCCTATTTCAACCGGATGCCTCGCATTCGGTTTTTTTTACCCTTCTTT
2315999	+	797.399	internal,	I:gene_id "EG12385"; gene_name "rcsD";	ATGTTAAGAGGCTGTATACTGAAGCAGCAACCAGTGACTTTGCTGCGTTAGCCCAAACGGC
2316269	+	865.27	internal,	I:gene_id "EG10821"; gene_name "rcsB";	GTCTTGTTCGGTATTCGCAAATCACTTGAGCAAATTGAGTGGGTGAATGTTGTCGGCGAAT
2316833	-	40046.9	antisense,	A:gene_id "EG10821"; gene_name "rcsB";	CAATCGGTGCAAATGCCAGATAAGACACTAACGCGTCTTATCTGGCCTACAGGTGATTAGT
2333993	+	3753.76	orphan		GCCGTGACTGAGAAGAGAAAGTACGCTGCATCACGCGGCGAGATTTGCCGTACCAGTTATC
2336713	-	83850.2	orphan		TCTCCCTTGTTTGAATTGAAAAGTCCAGGCTGCAAAGTCTGGGCTTTTGTCGTATTAGGGC
2349897	-	395838	primary, antisense,	P:gene_id "EG10399"; gene_name "glpQ";,A:gene_id "EG12881"; gene_name "yfaH";	TAATAAAGAGTAATGTTACTGCAGGATGGCGTTCATGCGCCATCCTGTCTCATATCAAATT
2350582	-	31772.2	internal,	I:gene_id "EG10399"; gene_name "glpQ";	AAAAAGTGCAGACTTATCCGGGGCGTTTCCCAATGGGTAAGTCCGACTTCCGGGTGCACAC
2351179	-	24909.4	internal,	I:gene_id "EG10401"; gene_name "glpT";	TACGGCAGCGGGCTTTACCGGGCTGTTTGGTTACCTGGGCGGTTCGGTGGCGGCGAGCGCG
2352270	-	72694.6	internal,	I:gene_id "EG10401"; gene_name "glpT";	ATCGATCCGACTTATCGTCGATTGCGCTGGCAAATTTTCCTGGGGATATTCTTTGGCTATG
2352721	+	1480.3	internal,	I:gene_id "EG10391"; gene_name "glpA";	AGTGACGTGATTATCATTGGCGGCGGCGCAACGGGAGCCGGGATTGCCCGCGACTGTGCCC
2353455	+	1017.97	internal,	I:gene_id "EG10391"; gene_name "glpA";	CGCCGATATTCTGGTGCCTGGCGATACCATTTCGCTGATTGGTACCACCTCTTTACGTATT
2354383	+	1238.54	internal,	I:gene_id "EG10392"; gene_name "glpB";	ACACGGCCTGCGCTGTGCCATTGTCACTCGTGGTCAAAGCGCACTGCATTTCTCATCCGGA
2365011	+	3673.18	primary, antisense,	P:gene_id "G7164"; gene_name "nudI";,A:gene_id "G7165"; gene_name "ais";	TTTGAAAGGTCTTCTGTAACAATGATGACAGCCATTACTGGCTGTCAGATTGAAAATTTAG
2380674	-	54111.6	primary,	P:gene_id "G7173"; gene_name "elaB";	TAAAACCTCCCTACACCGGGGTACTGCATTTTTTTTGTAGTACCCCGTATAATGTGAGGCT
2391429	-	48943.2	internal,	I:gene_id "EG12093"; gene_name "nuoN";	CGCACTGCTACCGTTGCTGATCGTCGGCTTGACGGTGGTGGTTGTGATGCTCTCCATTGCG
2394829	-	26039	internal,	I:gene_id "EG12092"; gene_name "nuoL";	CGAGCAGACATACAGCCAGCCGCTGTGGACGTGGATGTCGGTAGGCGACTTTAACATCGGT
2399938	-	52388.8	internal,	I:gene_id "EG12087"; gene_name "nuoG";	CGTGGTCGCCTGGTGATGTCCTGTATGACACCGGCTTCCGATGGCACCTTTATTTCCATTG
2403873	-	22904.2	orphan		CTTCGCTTATTCCTAAATCTATTTCGCGAAGCTTACTGCGCCGACAGTCACCACGGACCAT
2405086	-	282730	orphan		ATCGATGTGGCGTCCATCTGCCGTGAAGAGCAGTGAATCTGGCGCTACTTTTGATGAGTAA
2405297	-	31207.3	orphan		GATTCAACAACATCTAATTATCCTGGAGTCGTCAAGGATCTGGGGTGAAAGGGCATTAAAT
2406691	-	25756.6	orphan		CGGATGAAACTGCCAGGGAGGCACATTACAAATGGAATTGCTTGTTTGTGTGTGCACAGCA
2406927	-	32930.2	orphan		CCATTGCTGTTGGTACGTGTTCGCGTATGACCAGCGATGCTGCACGAGAGTGGAACAAGGA
2418606	-	36912.2	primary, antisense,	P:gene_id "G7191"; gene_name "yfcD";,A:gene_id "G7190"; gene_name "yfcC";	TAGAGACTGAAACGGCAGAATGAAAAAAGAGCCGCAATTGCGGCTCTTAACATTTTTAGTG
2427825	-	575966	orphan		TGGCATAAGACCTGCATGAAAGAGCCTGCAAACACACAACACAATACACAACATAAAAAAG
2428685	-	26321.4	primary,	P:gene_id "EG10794"; gene_name "purF";	CATAACGAAGGATGATGCCTTCGCTGAGGGTGCCGGTCTGGCACCCTGACTTGCAACTCCC
2429970	-	28891.4	internal,	I:gene_id "EG10794"; gene_name "purF";	GCGTTACCCCACGGCTGGCAGCTCCAGCGCCTCTGAAGCGCAGCCGTTTTACGTTAACTCC
2430606	-	65238.7	internal,	I:gene_id "EG10169"; gene_name "cvpA";	TGCTTTCTTTGTTGCCAGTCATTACTACACTTACCTGTCAGTCTGGTTTACGGGCTTTGAA
2440281	-	101586	orphan		ATGCGGCCTCCGGCACTAACGCAAAAGGGAACCTGATGGTTCCCTTTTTCACATCATTGAC
2441429	-	46938.1	internal,	I:gene_id "EG10274"; gene_name "fabB";	GGCATGCGTAGCCACGTCTGGGGCAACGTAAAACTGGATACCACTGGCCTCATTGACCGCA
2443784	-	64391.5	antisense,	A:gene_id "G7199"; gene_name "mnmC";	TACACGTCACACGTAGGTCGGATAAGGCGTTCACGCCGCATCCGGCAAACACTGCGAGAGC
2447546	-	95288	internal,	I:gene_id "EG12449"; gene_name "prmB";	AGTTTGATAACGGCGGCGATGGTGTGTTTATGCTCACCAAAGAGCAGCTTATTGCCGCACG
2456929	-	32337	orphan		GGAGTGTTGGTCAAAATGTAAACGCATATTGACTATACTTACGCCATTGAGGTAAAAAACA
2462694	+	1497.26	primary,	P:gene_id "EG10280"; gene_name "fadL";	TGATAACGCGTTCGCCTGGATAAAGTCACCTGCATAGCAGGTGACTTTAACTCCCCCACTT
2466383	+	3566125	primary,	P:gene_id "EG30016"; gene_name "argW";	CGAGCCCCTCCTAAGGGCTAATTGCAGGTTCGATTCCTGCAGGGGACACCATTTATCAGTT
2470466	-	147960	primary, antisense,	P:gene_id "G0-16635"; gene_name "ryeG";,A:gene_id "G7221"; gene_name "yfdI";	AAATTAGGTTGGTATTATAGCTTGTGCGCGCCATGATTGGCGCGCAATTTAAACTTAGTGC
2470496	+	11384.2	primary, antisense,	P:gene_id "G7221"; gene_name "yfdI";,A:gene_id "G0-16635"; gene_name "ryeG";	GCGATGTAAAGCACTAAGTTTAAATTGCGCGCCAATCATGGCGCGCACAAGCTATAATACC
2476598	+	2349.81	orphan		CATTCCAATCAATCCCCTGCTGCTTCAAGTAGATGTCTGCAGGGGACACCATCCTTGTGTT
2480585	+	1242.78	orphan		GTTTCAACGCAGCATCGCAATCCTTTCCCTGGGTGAGCGATGCTGCCGATGGCGCAGACTT
2483701	+	8164.94	orphan		AGGAAGCTCAGATTTTCTTATTTTTATTGAGAAAATGAGATGACGCCTTATGTCTGTATTA
2484420	+	1247.02	internal,	I:gene_id "EG11610"; gene_name "evgS";	CCACATGAAGTTTTTACCCTATATTTTTCTTCTCTGTTGTGGTCTTTGGTCGACCATAAGT
2495560	+	1811.13	orphan		CGTGGTTATGTCCTGACTAGTCTTTACACTCTTTACAGGAACCATTGTCGTACATGATGGC
2498710	+	1789.94	internal,	I:gene_id "G7243"; gene_name "ypdA";	CAGAGTCACCCGTGCACGAAATATTCAACATGCTGCTGGCGGTCTTCGATCGGGCAGCGTT
2518156	-	1231010	primary,	P:gene_id "EG30011"; gene_name "alaW";	GCTTGCATGGCATGCAAGAGGTCAGCGGTTCGATCCCGCTTAGCTCCACCAAATTTTGCAC
2518453	+	2527.93	orphan		TGTTATAAAATGAACTACTAATAGACCCACATACATTCAGGGAATTGTTATGTTCAAGGAG
2521009	+	1657760	primary,	P:gene_id "EG30110"; gene_name "valU";	TCCCTTACAAGGAGGGGGTCGGCGGTTCGATCCCGTCATCACCCACCAACTACTTTATGTA
2531015	-	30049.4	internal,	I:gene_id "G7258"; gene_name "zipA";	GTCGAAGATGATGAGGGCGTTGGTGAGGTTCGTGTTCACCGCGTGAATCATGCCCCGGCTA
2531130	-	159708	internal,	I:gene_id "G7258"; gene_name "zipA";	CGCTTTACTGGTACATGGTTTCTGGACCAGCCGTAAAGAACGATCTTCTATGTTCCGCGAT
2533734	+	2362.53	orphan		GCTAACAATACAGGCTAAAGTCGAACCGCCAGGCTAGACTTTAGTTCCACAACACTAAACC
2534344	+	7231.8	internal,	I:gene_id "EG10789"; gene_name "ptsI";	ATTATGCTGCTCGAAGATGAGGAGCTGGAGCAGGAAATCATAGCCCTGATTAAAGATAAGC
2543792	-	65831.9	primary,	P:gene_id "EG12133"; gene_name "ucpA";	TCGGTATCTGATTCACCTCTGTTTCCTCCCTGCATTTGTGGGGAGGATTTCGTCTTGAACT
2550560	-	30331.8	orphan		AAACACGTAAAATAGCGCTCAACAATGCCACGGATTGCGTGGCATTATTATTTTCAGGAGG
2557370	+	20368	antisense,	A:gene_id "EG50006"; gene_name "eutB";	AGAAGAACAGTGACGGATCGCCCGCCCGTTTGGTCAGGCGACCGTTTGCCATAATGCCCAT
2557751	+	950.097	antisense,	A:gene_id "EG50006"; gene_name "eutB";	CCACGGTGTTGACGATAAACGGATCGTAATGACGCGCCAGCCCGTAGTTACGTGCTTCCAT
2558861	+	1183.38	internal,	I:gene_id "G7272"; gene_name "intZ";	GGATACATGATCGGGGTTATCCAGTCGTTAAATCAAGGTATCCGGTTTTGAGCAAGACACC
2560302	-	25474.2	antisense,	A:gene_id "G7273"; gene_name "yffL";	TTGTTTCTCATACCGCCCCCGGCATGTTGCAGCATTCCGGGGGCTTTTATTTGTGTTGATC
2561657	-	42927.7	antisense,	A:gene_id "G7274"; gene_name "yffM";, gene_id "G7275"; gene_name "yffN";	TCCAGTTTTAACTCTTTGGTCGCCACTGATTCTGCGTGTTCGCGGTCTTCTGCAAAATCAA
2572217	+	945.857	antisense,	A:gene_id "G7287"; gene_name "eutM";	CTGCTATCGCCTTTCAGGCCGATCGGGAAGACTTCTTCCAGGTCGCCGTGCGGACGCGGGA
2590726	-	105625	antisense,	A:gene_id "EG10014"; gene_name "acrD";	CCGCTGAGCAGGTTCTTAATCGGAAAGTTGAAAAAGGCGACACATTGGCATGTCGCCTTTT
2597798	-	23469	primary,	P:gene_id "EG10658"; gene_name "bamC";	GCTGCGTTTAGCAAGTAAAAATACAGGGCTGGAATCATCCGGCCCTTTTTTCTGATATGAT
2599738	-	52671.2	internal,	I:gene_id "EG10205"; gene_name "dapA";	AGACACTTGTTTGCACAGAGGATGGCCCATGTTCACGGGAAGTATTGTCGCGATTGTTACT
2600994	+	11694	primary,	P:gene_id "EG10108"; gene_name "bcp";	CCTGATTACTTTGCTCCATTCCGTGCTGGCTGCGCTTGCGGCCAGCATACCTCACTTCTCG
2618003	+	1700.88	orphan		TAGTTGAAGCACATTGCCGGATGCGACGCTTGCCACGTCTTATCCGGCCTACGAATACTAT
2629573	+	3138.73	orphan		CTGTCGGATGCTTTTGCTGTTTGGGATTATCAAAGCGGCAGATATTCTTTCATCTTAAATT
2637422	-	36912.2	orphan		CGTCTCTGTCGTTCACTTTGAAAACGGCTCCTGGACAGGGGCCGTTTTCCTGTTTTTAACA
2640283	-	276771	internal,	I:gene_id "EG10453"; gene_name "hisS";	CCCTGAAGGGACGGCGGGCTGTGTACGCGCCGGCATCGAGCATGGTCTTCTGTACAATCAG
2640434	-	44932.8	internal,	I:gene_id "EG10453"; gene_name "hisS";	ACGTGCTCGGCAGCTACGGTTACAGTGAAATCCGCTTGCCGATTGTAGAGCAGACCCCGCT
2641247	-	64109.2	internal,	I:gene_id "EG10370"; gene_name "ispG";	CGCCTGAACTTCGATCAGTTCAAAGTCAGCGTGAAAGCGTCTGACGTCTTCCTCGCTGTTG
2642824	-	63826.7	internal,	I:gene_id "EG10015"; gene_name "rodZ";	TCAATTCTCATTTAAACGTACCTGCAGCGAATGAATACTGAAGCCACGCACGACCAAAATG
2644336	-	272704	orphan		TTTGTACAATGCAGCGCCCCCGGACGAGCAGCCGCTCACCGGGGCGTTTCTTTTTTCAACC
2644588	-	29767	internal,	I:gene_id "EG10650"; gene_name "ndk";	TGCTGGAAGGTGAAAACGCCGTTCAGCGTCACCGCGATCTGCTGGGCGCGACCAATCCGGC
2653679	-	107037	antisense,	A:gene_id "G0-8908"; gene_name "IS128";	CCGCGAACCGGACCAGCAACAAAAAACCGCCTGATTTTGGCGGTTTTTTGTTTTTTAAAGG
2653940	+	856.794	internal,	I:gene_id "G0-8879"; gene_name "ryfA";	CTTTAGGAAAGGATGTTCCGTGGCCGTAAATGCAGGTGTTTCACAGCGCTTGCTATCGCGG
2654157	+	7630.49	internal, antisense,	I:gene_id "G0-8879"; gene_name "ryfA";,A:gene_id "EG11601"; gene_name "sseB";	ACCTTCAGAGCAGCAAGTAAGCCCGAATGCCGCCCTTTGGGCGGCATATTTTAGATTATCC
2663263	-	212633	internal,	I:gene_id "G7327"; gene_name "trmJ";	ATATTCGAATTGTGCTGGTGGAGACGTCACACACCGGCAATATGGGTTCTGTTGCCCGTGC
2684070	-	100739	antisense,	A:gene_id "G7344"; gene_name "yphH";	AGGCAATTTTTCGTTTATGATCATCAAGGCTTCCTTCGGGAAGCCTTTCTACGTTATCGCG
2686815	-	25191.8	antisense,	A:gene_id "EG10456"; gene_name "hmp";	TCCATCAGACCTTCGCTATCAAACTGACCTTTAGCGCGATCGGCTTCGCTCGGCTGACGAT
2687026	-	255618	primary, antisense,	P:gene_id "EG10384"; gene_name "glnB";,A:gene_id "EG10456"; gene_name "hmp";	AATTTAAACCGCGTCAAGGGTTGCCGGATGTTTCCATCCGGCAACATCAAATTACAGCACC
2687286	-	23186.7	internal,	I:gene_id "EG10384"; gene_name "glnB";	ATTACCGGCATGACGGTGACCGAAGTGAAAGGCTTTGGTCGCCAGAAAGGCCATACCGAGC
2691192	-	3670795	internal,	I:gene_id "G0-8910"; gene_name "glmY";	AGCGTAGCTATATCAACCATCGGGCGAAACGTCGAGTTAGGCACCGCCTTATTCCATAACA
2700059	-	108167	orphan		AAACGTACTTAAGGTGCGTCCGGTGAACCAGTCGGACGCACCTTTAATAACTATAAATAAG
2700341	-	40922.5	orphan		ATTAAAATTGGCTTCGTTATTGAAGATTTTGCTGTGCTTTACACCATGCCACAGAATTCCC
2701775	-	26039	internal,	I:gene_id "EG10832"; gene_name "recO";	GTATCTTGGCGGTAAACCTTTAAAGAGCAGGGAACTGTTCCGGCAGTTTATGCCTAAGCGA
2704184	-	48378.4	orphan		AATATTCCCCCGAAGTTTAAGGTTGGCACCTCCAGGTTGCCACGGCACACGAAACAGCGTT
2709165	-	34342.1	internal,	I:gene_id "EG12341"; gene_name "rseA";	GAAGAAGAGCCAGTACGTCAACCGGCGACATTGATCCCGGAAGCCCAGCCTGCGCCGCATC
2709319	-	23751.4	internal,	I:gene_id "EG12341"; gene_name "rseA";	CGAAACGCTGGATAGTGAGCTGCTTAACGAACTGGCTCATAACCCAGAAATGCAGAAAACC
2709556	-	99044.4	internal,	I:gene_id "EG11897"; gene_name "rpoE";	AGTCCCTCCCGGAAGATTTACGCATGGCAATAACCTTGCGGGAGCTGGATGGCCTGAGCTA
2709806	-	26039	internal,	I:gene_id "EG11897"; gene_name "rpoE";	GCTTTTATTAAAGCCTATCGTGCGCTGGATTCGTTCCGGGGAGATAGCGCTTTTTATACAT
2709912	-	27761.8	internal,	I:gene_id "EG11897"; gene_name "rpoE";	AGATCAGAAAGCCTTTAACTTACTGGTAGTGCGCTATCAGCATAAAGTGGCGAGTCTGGTT
2710044	-	32337	orphan		CCCTTTGCTTGCTCAAATTGCAGCTAATGGAGTGGCGTTTCGATAGCGCGTGGAAATTTGG
2719983	+	1412.43	internal,	I:gene_id "G7350"; gene_name "patZ";	CACTTCTGCGGGAGACCGGTATGAGTCAGCGAGGACTGGAAGCACTACTGCGACCAAAATC
2720099	+	3448.36	internal,	I:gene_id "G7350"; gene_name "patZ";	CGTAACCTGCTGGCGGGAGGCTTTAACGGACCGGTACTCCCGGTGACGCCAGCCTGGAAAG
2724366	-	228703	antisense,	A:gene_id "EG12857"; gene_name "yfiM";	TGCTTGCACCGGCGACATCCCAGGCCAAATCCTTCCAGCTCCAGCCGCTCCCTTCGGGGCG
2725589	-	124801	internal,	I:gene_id "EG10522"; gene_name "kgtP";	CGATTTCTATGTCTACTCGTTCTGTTCACTCTACTTTGCCCACATCTTCTTCCCTTCCGGG
2729192	-	425802	orphan		TTGTTCGTGAGTCTCTCAAATTTTCGCAACTCTGAAGTGAAACATCTTCGGGTTGTGAGGT
2729477	-	46090.8	orphan		AGAGAATAAGGCCGTTCGCTTTCTATTAATGAAAGCTCACCCTACACGAAAATATCACGCA
2731408	-	956104	orphan		ATGCGCCACCACTGACACGGAACAACGGCAAACACGCCGCCGGGTCGGCGGGGTTCTCCTG
2734153	-	26517500	primary, internal,	P:gene_id "G0-10600"; gene_name "ryfD";,I:gene_id "EG10157"; gene_name "clpB";	TAGCAACTTTGATCCGTTATGGGAGGAGTTATGCGTCTGGATCGTCTTACTAATAAATTCC
2736152	+	848.319	internal,	I:gene_id "G7352"; gene_name "bamD";	ACAGAGAATCTCCCGTATTACATTTTGAGGAAAGTCAAAACGTCATGACGCGCATGAAATA
2737542	+	71914.8	primary,	P:gene_id "EG11151"; gene_name "raiA";	GTAGTCCTTTATATTGAGTGTATCGCCAACGCGCCTTCGGGCGCGTTTTTTGTTGACAGCG
2741955	+	856.794	internal,	I:gene_id "G7354"; gene_name "yfiR";	CTGATTCTCCTGCTGACGGGAGCACCAATACTCGCTCAGGAGCCTTCTGACGTTGCGAAAA
2744124	-	192836	antisense,	A:gene_id "EG11152"; gene_name "yfiB";	TTAAGCGACATCCTGTTAAGAAGGGCTGGCCAATTGGCTGGCCCTTTTTTATCTGTTTGCT
2744357	-	29202.2	internal,	I:gene_id "EG10880"; gene_name "rplS";	GCATTCGAGGGCGTGGTTATCGCTATTCGTAACCGCGGTCTGCACTCTGCATTCACTGTTC
2745721	-	36347.3	internal,	I:gene_id "EG11153"; gene_name "rimM";	CAGAAGGCGGGTCAGTGGCAGCAAGTCCAGCTGGAAAGCTGGAAGCACCACAATCAGGACA
2745857	-	56399.2	internal,	I:gene_id "EG11153"; gene_name "rimM";	ACTCACCGCGCAAGCACCTGTTGATCCCATCGTTTTGGGAAAAATGGGTTCGTCTTACGGT
2745987	-	90713	internal,	I:gene_id "EG10915"; gene_name "rpsP";	CTCGCCTGGATCTGGATCGCATCGCTCACTGGGTTGGCCAGGGCGCAACTATTTCTGATCG
2746203	-	79275	orphan		CTTTTAATATGACACCGGACTCCGTTCCTCGATGGGGTCCGGTTGTTTTATTCACACAAGA
2747693	-	31772.2	internal,	I:gene_id "EG10300"; gene_name "ffh";	GCCGTGGACGCCTCACTGAAGACAACGTAAAAGATACGCTGCGCGAAGTGCGCATGGCGCT
2750062	-	323483	antisense,	A:gene_id "EG12442"; gene_name "yfjD";	TCTGCTTTCGTAATAATTCACGGCCCTGCATGCGAATGCCGGGCCGTTTTCGTTACTCCGC
2753644	+	1107.03	internal,	I:gene_id "EG10952"; gene_name "bamE";	ATCAAATCACTATGCGCTGTAAAACGCTGACTGCTGCAGCAGCAGTACTATTGATGTTGAC
2754002	+	1263.97	antisense,	A:gene_id "G7357"; gene_name "ratB";	AAGTTGCTCTCAAAGACGTTAAAAAAGGTGCTCAATGAGCACCTTTTTTCTGTCTGTTATT
2755026	+	1811.13	internal,	I:gene_id "EG11782"; gene_name "smpB";	AGAAGAGTTCGAAGCGGGACTTGCCCTGCAAGGCTGGGAAGTTAAATCCCTGCGCGCAGGA
2755955	+	2246280	primary,	P:gene_id "EG30100"; gene_name "ssrA";	CCGAGGATGTAGGAATTTCGGACGCGGGTTCAACTCCCGCCAGCTCCACCAAAATTCTCCA
2766784	+	1170.67	internal,	I:gene_id "G7365"; gene_name "rnlA";	CAGCAGCCGGCAGGTTTTGGAACTTACTTTGATAAACCTGCTGCTCATTACATTCTGAAAC
2766897	+	1013.73	internal,	I:gene_id "G7365"; gene_name "rnlA";	CTATACTTTTTTTAATGTGGAACGTCATTCTCTGTTCCACATGGAAACTGTGGTCGATGCC
2796240	-	23751.4	antisense,	A:gene_id "EG12386"; gene_name "csiR";	AAATGCTGGCGCATTAACTCACTGGCGCGCGCGGTATCTCGCGCCAGTACCGCCGCAGTCA
2796831	-	27761.8	primary,	P:gene_id "G7396"; gene_name "yqaE";	ACCCGCGATTAAACCTGTGCTCATCCCCGCGGCGTTAACGCGCCGCGTTCCTCTGCTACAC
2798048	-	237656	primary, antisense,	P:gene_id "EG11554"; gene_name "stpA";,A:gene_id "G7398"; gene_name "ygaP";	TGATCTAATTACTGAGGCCGGATGTCGCTGCTAGGGCGCGTCCGGCGTCGCTTCTCAAGCT
2798243	-	35782.5	internal,	I:gene_id "EG11554"; gene_name "stpA";	ACGGAATTAACCCGGAAGAGTTATTGGGTAATAGCTCTGCTGCTGCACCACGCGCTGGTAA
2800533	+	784.683	orphan		ATGATAATAAATACGCGTCTTTGACCCCGAAGCCTGTCTTCGGGGTTTCTTTTTGCCTGGT
2800553	-	25191.8	orphan		AATAGTGGTCGAAATTACCCTGGATATGAGCGTGACGGGGTAGGGGGATTTTTGTGATTCA
2805035	+	4686.9	internal,	I:gene_id "EG10771"; gene_name "proV";	TGTCATCATGGGATTATCCGGCTCGGGTAAATCCACAATGGTACGCCTTCTCAATCGCCTG
2808169	+	2349.81	primary,	P:gene_id "EG10773"; gene_name "proX";	AAGTAATTTTTATTCGGGCGGATAAGGCGTTTTTGCCGCATCCGCCGTTCTGTGCACAATG
2809617	+	3838.59	internal,	I:gene_id "G7405"; gene_name "ygaZ";	ATATTCATTCAGTCTATTTATAATATTAACAATCGTTAAGCGTACACTCTATGGAAAGCCC
2811376	+	861.032	orphan		ATTTATAAAAGAAAAAATGACTGGCCAGCATCGCAACATGCTGGCCTTTTTGGCAAGCAGG
2814159	-	208906	antisense,	A:gene_id "EG11439"; gene_name "emrB";	CTATCTTCACAATTAATTGAAAAAAGCCAGTTCAAATGAACTGGCTTAGTTGTACTTAGTG
2814861	-	34624.6	primary, antisense,	P:gene_id "EG10418"; gene_name "gshA";,A:gene_id "G0-8866"; gene_name "micA";	TTGCGGTGTGGCTGGAAAAACACGCCTGACAGAAAAGAAAAAGGCCACTCGTGAGTGGCCA
2814877	+	143109	primary, antisense,	P:gene_id "G0-8866"; gene_name "micA";,A:gene_id "EG10418"; gene_name "gshA";	TCCCTGAATTCAGAGATGAAATTTTGGCCACTCACGAGTGGCCTTTTTCTTTTCTGTCAGG
2817684	-	132511	orphan		AACCGCAGGCACCAGGAAGGATAACGTTGCGCCAGCAACGGCCCGAAGGGCGAACGTCAGT
2817959	-	96756.9	orphan		AACCGCAGGCACTAGGGATGATAACGTTGCTTTAGCAACGGCCCGAAGGGCGAGCCGCAAG
2818194	-	3148125	primary,	P:gene_id "EG30018"; gene_name "argY";	GGCTACGAACCGAGCGGTCGGAGGTTCGAATCCTCCCGGATGCACCATCTCTTACTTGATA
2818553	-	271871000	primary,	P:gene_id "EG30095"; gene_name "serV";	AGTATGCGGTCAAAAGCTGCATCCGGGGTTCGAATCCCCGCCTCACCGCCATTTGCATCCG
2818923	-	706302	primary,	P:gene_id "EG11447"; gene_name "csrA";	GTCCAGTTACTAATCTTTCCGCGTCTCATCTTTATCGGTGAGACGCACCCTCAAAATTTCT
2819109	-	71819.1	internal,	I:gene_id "EG11447"; gene_name "csrA";	CAAGGAGCAAAGAATGCTGATTCTGACTCGTCGAGTTGGTGAGACCCTCATGATTGGGGAT
2819606	-	24033.8	internal,	I:gene_id "EG10034"; gene_name "alaS";	TTGCGTACCATGGTTGACGATTTAAAAAATCAGCTGGGGTCGACAATTATCGTGCTGGCAA
2822664	-	172050	primary,	P:gene_id "EG10823"; gene_name "recA";	TTTTTAATCGTCTTGTTTGATACACAAGGGTCGCATCTGCGGCCCTTTTGCTTTTTTAAGT
2826058	+	1412.43	internal,	I:gene_id "G8210"; gene_name "srlA";	TTGCGCCGGTAACCCTGTTTCCCGTTACCTACTGTTACCGTGCATTGGCACGTTTGTCTTT
2828590	+	4665.72	orphan		ATCTCCGTGAGACTATAGAATGCCTGATGCGCTACGCTCATCAGGCATACAGGACTTCCGC
2837453	-	55806	orphan		CGACCTGTGACTGCCGGATGCGACGCTGTCGTGTCCGGCAGGGCGGGTTACGCAATTCATG
2867664	-	25191.8	internal,	I:gene_id "EG12111"; gene_name "nlpD";	CGACCATGGGTAGCACCGGAACCAGTTCAACACGCTTGCATTTTGAAATTCGTTACAAGGG
2872693	-	34342.1	internal,	I:gene_id "G7424"; gene_name "ftsB";	ACATGACTATACCCGCGTCAATGATGATGTGGCGGCACAGCAAGCTACAAACGCGAAACTT
2887407	+	2574.62	internal,	I:gene_id "G0-10695"; gene_name "sokX";	GGGTTCGAACGCTGGCCTCAGGTTGATAGAAATATCGCCTGGGGCTTTTGTCCATCTGGAA
2892741	+	1077.36	internal,	I:gene_id "G7432"; gene_name "ygcN";	CCGGTATTGCAGGCACCGCTTGCGCGTTACGCTGCGCGCGAGCGGGTTTATCCGTTTTGTT
2900311	-	40640.1	orphan		GTTACCAGAGATAATGAGAAAGGTAACTTCCCTCTCGCGGGGGAAGTTACCTTTCTTTTTT
2900556	+	1556.65	orphan		ATTACTAGAGACCTGAGAAAAGTAATCCACCTGAAAGGGCGGCTTACTTTTCTCTTTTTTT
2904041	+	1879	orphan		AAAGAGATAACGGGTTATATGGTGGTTTATCCCCGCTGGCGCGGGGAACTCGACAGAACGG
2904075	-	51541.6	orphan		AGTCCATAGATTTGCGAAAACAGGTGTTCCCCGCGCCAGCGGGGATAAACCGGAGCCTGAC
2904326	-	107122	orphan		AAAAACCGGGCAATCGCAAAAAGGCGTAATGTGTTCCCCGCGCCAGCGGGGATAAACCTGT
2909630	-	253274	internal,	I:gene_id "EG10810"; gene_name "pyrG";	TTCTCAGGTTCAGCATGACAACGAACTATATTTTTGTGACCGGCGGGGTCGTATCCTCTCT
2910995	-	24627	internal,	I:gene_id "EG11249"; gene_name "mazF";	ATTTTGACCCGACAAAAGGTAGCGAGCAAGCTGGACATCGTCCAGCTGTTGTCCTGAGTCC
2913710	-	135363	internal,	I:gene_id "EG11247"; gene_name "rlmD";	TGGATATGTTCCCACACACGGGACATCTGGAATCGATGGTACTTTTCTCGCGCGTTAAATA
2913947	-	27761.8	internal,	I:gene_id "EG11247"; gene_name "rlmD";	ATGTGACGTTTTATCACGAAAATCTTGAAGAAGATGTCACAAAGCAGCCGTGGGCGAAAAA
2914915	+	2108.05	antisense,	A:gene_id "EG11247"; gene_name "rlmD";	GCAATAATCCGGGGATAAATAGCGTTTTGCCGTTATGTCGCGCCACGCCCTGACCAAAAGA
2924161	-	1235725	internal,	I:gene_id "G0-8785"; gene_name "csrB";	GGAATGCTGCGAAACGAACCGGGAGCGCTGTGAATACAGTGCTCCCTTTTTTTATTCCTGC
2927709	+	1319.13	primary,	P:gene_id "EG12373"; gene_name "ygdH";	AAATCTGCACGTAATCTCCGCTCCCCCGGTGACGTTTGTTGCCGGGTTTTCTCGTTTTTGG
2928350	+	1255.49	internal,	I:gene_id "EG12142"; gene_name "sdaC";	GTGGATGCTGGGCCTTTACGGCACGGCAATCGGCGCGGGCGTGCTGTTCCTGCCAATCAAC
2928864	+	1187.62	internal,	I:gene_id "EG12142"; gene_name "sdaC";	TCTCTGGACACTGCATCTGCAACCGGAAACGGTCTGTGGATGACCCTGTGGCTGGCAATTC
2929551	+	4729.29	primary,	P:gene_id "EG12142"; gene_name "sdaC";	TACTCTCTGTTCAGCTAAGTCCTTTCGCGCCGCTTTCGGGCGGCGCTTCCTCCGTTTTAAC
2930979	+	3609.54	primary, internal,	P:gene_id "EG11623"; gene_name "sdaB";,I:gene_id "EG12372"; gene_name "ygdG";	GTTGCCTGCGATTAATCGCTCTCCAAAGGCCTCGTTTTGCGAGGCCTCTTCCCGATTTCTC
2934914	+	1806.89	internal,	I:gene_id "EG10352"; gene_name "fucP";	ACCTTATATGATCATCGTGGCTATCGTGTTACTGGTCGCCCTGCTGATCATGCTGACGAAA
2939527	+	1107.03	internal,	I:gene_id "EG10353"; gene_name "fucR";	GCGATCTCAATGAATTACAGACGCAGGGTAAAATTCTGCGCAATCATGGACGCGCTAAATA
2940106	-	46938.1	primary, antisense,	P:gene_id "EG11794"; gene_name "rlmM";,A:gene_id "EG10353"; gene_name "fucR";	GCGACGAGCGATAACAGGCAAGGCCGGGGCGTCGTCTCCGGCCTGCTACCCTTTCCGTCAG
2942870	-	36629.7	primary, antisense,	P:gene_id "G7453"; gene_name "ygdI";,A:gene_id "G0-8867"; gene_name "gcvB";	TAATTCGCGATCGCAAGGTAAAAAAAAGCACCGCAATTAGGCGGTGCTACATTAATCACTA
2942894	+	134815	internal, antisense,	I:gene_id "G0-8867"; gene_name "gcvB";,A:gene_id "G7453"; gene_name "ygdI";	TTACCCTGTCTGTCCATAGTGATTAATGTAGCACCGCCTAATTGCGGTGCTTTTTTTTACC
2945008	+	1709.35	primary, antisense,	P:gene_id "G7455"; gene_name "csdE";,A:gene_id "G7456"; gene_name "tcdA";	GATTATCGCTGCGACGAAGCAGGTTTAAGCACAGAACCGGGTCGGATAAGACGTTCGCGTC
2945855	-	32337	orphan		CGCATCAGGCATTTATGCGTTTAGGGTGAGGGATAACCTCGCCCTTTTTAATTCTGAGGTG
2947055	-	25474.2	internal,	I:gene_id "G7457"; gene_name "mltA";	CAACCGATCGCGGACAGCAATATAAAGACGGGAAATTTACCCAGCCTTTCTCTCTGGTGAA
2947577	+	2108.05	primary,	P:gene_id "EG31117"; gene_name "metW";	GGCTCATAACCCGAAGGTCGTCGGTTCAAATCCGGCCCCCGCAACCAATCAAATTTGATGA
2947715	+	6608.29	primary, antisense,	P:gene_id "EG30060"; gene_name "metV";,A:gene_id "G7458"; gene_name "amiC";	AATCCGGCCCCCGCAACCAATTATTGAACACCCTAACGGGTGTTTTTTTGTTTCTGGTCTC
2968869	-	23469	internal,	I:gene_id "G7459"; gene_name "rppH";	GGCAGGTAATGTGGGCCCGGCGATTTGGTCAGCACTCCTGGCAATTTCCGCAAGGCGGAAT
2971170	+	784.683	primary,	P:gene_id "G7460"; gene_name "ygdQ";	AGAATCCGCTCTGATACTCCGTACGCTCTCCTGCGGGAGGGCGTACTCACTCCTTTTACCC
2971521	+	5509.73	primary,	P:gene_id "G7461"; gene_name "ygdR";	GCAAATTATTGAACGTTAACAAATAAGGTCAGCATCCGGCTGGCCTTAAGATTTTTCTCTT
2972707	+	1009.49	antisense,	A:gene_id "EG12455"; gene_name "lplT";	CGGCGTTAAATATTAATGACGGCGCTGCCAGATCCACAGCGCCGTTATTGCCAGCGCAAAC
2976102	-	104184	primary,	P:gene_id "G0-8868"; gene_name "omrA";	CTTCGTACCCTGTCTCTTGCACCAACCTGCGCGGATGCGCAGGTTTTTTTTCGCACCTAAT
2976305	-	416964	internal,	I:gene_id "G0-8882"; gene_name "omrB";	CGGGTTGAGCACATGAATTACACCAGCCTGCGCAGATGCGCAGGTTTTTTTTGCCGGTCAT
2980766	-	36629.7	internal,	I:gene_id "EG10056"; gene_name "araE";	ATATCGAACGCAAACTGATGGCAGGCGAGAAGTTGAGAAATATCGGCGTCTGATTTCACGG
2987127	+	2748.51	orphan		TATCAGTTGTGGATGGTTCAAAATTGCTACAATTTTGAACCATTCCATTTTTCATAATATT
2988499	+	4559.64	orphan		TACTTAGCAAACTATGTGATCTCCATTTCGATTGATTTAGTGTTTATTGACGTATGTACTG
2998984	-	108743500	primary,	P:gene_id "EG30037"; gene_name "glyU";	CGAGAGCTTCCCAAGCTCTATACGAGGGTTCGATTCCCTTCGCCCGCTCCAATTTATCTTC
3022649	+	1102.8	internal,	I:gene_id "G7500"; gene_name "xdhD";	CATGAAACAGCATAAAGTTCATGTCATTAAAGAGCGAGTTGGCGGCGGTTTTGGTTCCAAA
3040416	+	1552.41	primary, antisense,	P:gene_id "EG12697"; gene_name "fldB";,A:gene_id "G7509"; gene_name "cptA";	ATTACGCCTGATCTCACTGACGGCTTAGCGCATATGCTTTGCCGTCATCTTTATCTTTGCG
3042438	+	945.857	orphan		GCCCGTAGATCGGATAAGGCGTTCACGCCGAATCCGGCAGTTGTGCTCCGATGCCTGATGC
3045144	+	848.319	primary, antisense,	P:gene_id "G495"; gene_name "bglA";,A:gene_id "G7514"; gene_name "ygfF";	AGCTTTAAGTCGATGAAGTACCGGATGCAATACTTGTTGCATCCGGTCAGACAACTTCCCT
3046123	-	36064.9	primary,	P:gene_id "EG11810"; gene_name "gcvP";	CAGTAATTCACTGATTCGACTATTTTCTAAAGGCGCTTCGGCGCCTTTTTAGTCAGATGAC
3048758	-	29767	internal,	I:gene_id "EG11810"; gene_name "gcvP";	TAAACGCTTCACGTCTTACATCGGCATGGGTTACACCGCCGTGCAGCTACCGCCGGTTATC
3049097	-	412219	orphan		TCTTCTGCGGGAGAGGATCAGGGTGAGGAAAATTTATGCCTCACCCTCACTCTCTTCGTAA
3050602	-	105625	internal,	I:gene_id "EG11442"; gene_name "gcvT";	CCTTTGTACGAACAACACACGCTTTGCGGCGCTCGCATGGTGGATTTCCACGGCTGGATGA
3056168	+	392534	primary,	P:gene_id "EG30099"; gene_name "ssrS";	GAACCAAGGGTTCAAGGGTTACAGCCTGCGGCGGCATCTCGGAGATTCCCTTCTTATCTGG
3056785	-	140250	antisense,	A:gene_id "EG11158"; gene_name "fau";	TCAAAGAATCAACGATGTCAATCAGGGCGATGCGGGTGTATCGCCCTTACCACTCCCAGAC
3056959	+	188919	internal, antisense,	I:gene_id "G0-8886"; gene_name "sibC";,A:gene_id "G0-10631"; gene_name "ibsC";	ATGAGTAACAGTACAATCAGTATGATGACAAGTCGCATCATAACCCTTCTCCTTCAAGCCC
3058437	-	34624.6	orphan		CCGCAATATTATTTTTTGATATGTTGAAAGGCGGATGCAAATCCGCACACAACATTTCAAA
3070119	-	160555	primary,	P:gene_id "EG10282"; gene_name "fbaA";	TGTAAGATATTCCTTTCTGCTTATCTCAAGGCCCGCTCTGCGGGTCTTTTTTTCGCCAAAA
3071314	-	24316.2	orphan		ACAAGAGAGTGAATCCCCAGGAGCTTACATAAGTAAGTGACTGGGGTGAGCGAACGCAGAC
3071427	-	46373.2	primary,	P:gene_id "EG10703"; gene_name "pgk";	AGAGCGCGCTAAGAAGTAAAAAATCACAGGGCAGGGAAACCTGCCCTTGTTTCAGCGCGCT
3072734	-	309333	internal,	I:gene_id "EG10368"; gene_name "epd";	GGGTCAGTGGCGCACACCTGATCAAAACGTTGGTCTGGTGCGATAACGAATGGGGCTTTGC
3073682	-	34624.6	internal,	I:gene_id "EG10368"; gene_name "epd";	TGTCTGGCAAATTTGCTCAGGGAAAACCTTGCAGGAGATCTATGACCGTACGCGTAGCGAT
3081656	-	42080.5	orphan		CGGCGTAGCCCAAAACGCGCTGTCGTCAAGTCGTTAAGGGCGTGCCCTTCATCATCCGATC
3084813	-	27479.3	internal,	I:gene_id "EG10959"; gene_name "speA";	ACGGTCTGCCGCATCCGACGGTAATCACCGAATCGGGTCGTGCGGTGACTGCGCATCACAC
3085854	-	40357.7	internal,	I:gene_id "EG10959"; gene_name "speA";	ACGACATGTCTATGGGTTTGCCTTCGTCAGCGGGCGAACACGGTGTACTACGCTCCATGCA
3086295	-	27479.3	antisense,	A:gene_id "G7522"; gene_name "yqgC";	CAGAGTTTTGGCTTGTGGGTTCGTCTTAACAGGCGGCCGTGGAGGTGATACGAAATAATGA
3091697	+	1484.55	internal,	I:gene_id "EG12366"; gene_name "rsmE";	CACCCGCGCGCCAGTAACAGCATCAATACGTTGCCGTTACCGGTTGAACGCGTCCGCCTGC
3101011	+	1403.95	antisense,	A:gene_id "EG12705"; gene_name "yggN";	ACAAACATCTTTGCCAAACTGCTGGAAATCTTTTTCCTGCTTTTTCCACTCGGTTTGGATT
3101642	-	175128	orphan		GAAAACGCGTACTTTGTTATCAATCTGGGGCCAGCAAATGCTGGCCTGATTTTTTCTTGAG
3104399	+	2756.99	primary,	P:gene_id "G7532"; gene_name "yggX";	CGCCGGAAGATAAAAAATAAAAACAGTGCCGGAGCACGCCTCCGGCAACTTGCATAAAAAC
3110443	+	5588875	primary,	P:gene_id "EG30065"; gene_name "pheV";	GGGATTGAAAATCCCCGTGTCCTTGGTTCGATTCCGAGTCCGGGCACCACTAATTCTTAAG
3111489	+	1403.95	orphan		TCCGCTTCTGCTCCGGGAACAACGTTAAGAACTGTTCCTCCGCCTGGGTGCGGCTTTGCGC
3148944	-	109042	primary, antisense,	P:gene_id "G7559"; gene_name "yqhA";,A:gene_id "G7558"; gene_name "yghZ";	ACTCGTCATAATCACTGATCTGATTCGGGCGCGGTTCGCGCGCCCGTTATTAACAGGTCAT
3148973	+	933.144	primary, antisense,	P:gene_id "G7558"; gene_name "yghZ";,A:gene_id "G7559"; gene_name "yqhA";	TCTTCCGATAAATGACCTGTTAATAACGGGCGCGCGAACCGCGCCCGAATCAGATCAGTGA
3151678	-	135392	internal,	I:gene_id "EG10271"; gene_name "exbB";	ATTTGCTCAATGAAGCGCAGAATGAGCTGGAACTGTCAGAAGGCAGCGACGATAACGAAGG
3153564	+	3359.3	internal,	I:gene_id "EG11824"; gene_name "yghB";	GAGTACAATAGGCAGATAAAGGCTTAAACGCTGTTCCACAGGAAAGTCCATGGCTGTTATT
3163495	-	26603.8	orphan		ACAATGCCCTAACCTGATTTCAGGTGACGTACAATGCCAGTCTCTCAGACCTTCAGAGGGT
3169249	-	29202.2	primary,	P:gene_id "G7574"; gene_name "ygiW";	CAAAGTAAATCCGTAATTGTTACCGCTCCCGGGACGCGTTCCCGGGAATAATTTCGCAGGG
3173465	-	28044.2	primary, antisense,	P:gene_id "EG10687"; gene_name "parE";,A:gene_id "EG12657"; gene_name "ygiN";	ATTGAGGTTTAAAGGAAAGAACATTGCCCGGTCAGGATGGCCGGGCAAACAAGGCAGGATT
3173496	+	7087.57	primary, antisense,	P:gene_id "EG12657"; gene_name "ygiN";,A:gene_id "EG10687"; gene_name "parE";	CAGGGATTTAATCCTGCCTTGTTTGCCCGGCCATCCTGACCGGGCAATGTTCTTTCCTTTA
3175414	-	25474.2	primary,	P:gene_id "G7578"; gene_name "yqiA";	CAACCCGATCGTCGATTTTCTTGGTCTGCACCATCTCTGACGATCAACTCGAATTACTAAC
3176577	-	118786	internal,	I:gene_id "G7579"; gene_name "cpdA";	ATCCTCTGCGGCCTATCAGCATTTCGCTGAAGGCATCGCAAGTTTTCGTGCGCCCTGCGTC
3176896	-	64956.3	internal,	I:gene_id "G7580"; gene_name "yqiB";	GCGACGAAAAGCATCAAATTAATCAGTTTTTAGCGGACTGGTTGCGATACTGTTTAGCACA
3179628	+	4220.34	primary, internal,	P:gene_id "EG11009"; gene_name "tolC";,I:gene_id "EG11163"; gene_name "ygiA";	TAACCCTTTCCGTAACTGATGACGACGACGGGGCTTCGGCCCCGTCTGAACGTAAGGCAAC
3181617	+	1331.85	primary, antisense,	P:gene_id "EG11165"; gene_name "ygiC";,A:gene_id "EG11166"; gene_name "ygiD";	ATTTTTGTTGAATAAGCCACGATACCGGATGGCACTCGCCATCCGGTAATTGTTAGCCTAT
3184566	-	1349060	orphan		TGTAATTCCGGGGCCGACGGTTAGAGTCCGGATGGGAGAGAGTAACGATTCTGTCGGGCAT
3185189	+	7918.94	orphan		CTTTAATGCACTGTAAATTATGAATTAATCCTCTAATTTATAGTGCTTTCTATTACCTTAT
3191058	-	32337	antisense,	A:gene_id "G7587"; gene_name "yqiI";	TACTGGAAAAGTTACTGATAATTGCGGTTCAGGACCGCCACTACAGACTGCGGGCTTTTTG
3191712	-	151094	primary, antisense,	P:gene_id "EG11381"; gene_name "glgS";,A:gene_id "G7587"; gene_name "yqiI";	AGAGAGCTGGAGTTAGAGCACTGATATAACGGGCCTGATGGCCCGTTTTAGTGTTTGTATT
3192180	+	1624.53	orphan		TATTAACACAGATAAATGTAAGCAAGGAAACTATTACAAAGTAAATATTGCGTCACTAAAT
3194756	-	1860125	internal, antisense,	I:gene_id "G0-8913"; gene_name "sibD";,A:gene_id "G0-10630"; gene_name "ibsD";	ACGAGTAACAACACAATCAGTATGATGACGAGCTTCATCATAACCCTTTCCTTCTGTAAGG
3194855	+	1493.02	primary, antisense,	P:gene_id "G0-10630"; gene_name "ibsD";,A:gene_id "G0-8913"; gene_name "sibD";	GTAAGTTTCGCAGCTTATTAACAGCCAATCAGAGGGGGGAGAAATCCTCCCTCACCCTTGT
3195129	-	1789435	internal, antisense,	I:gene_id "G0-10602"; gene_name "sibE";,A:gene_id "G0-10629"; gene_name "ibsE";	CAGTAACAACACAACCAGTATGATGACGAGCTTCATCATAACCCTTTCCTTATACAAGGCC
3210757	+	941.62	orphan		AAATTCCGCACCATTTTGAAATAAGCTGGCGTTGATGCCAGCGGCAAACCGAATTAATCAA
3211076	+	565090	orphan		CCGAGTTGTAGTTGTAAGGCCGTGCTTCCGAAAGGAATGCGCGGCTTATTTTCGTTTATGA
3213242	+	937.381	internal,	I:gene_id "EG10896"; gene_name "rpoD";	ACGACATGGGCATTCAGGTGATGGAAGAAGCACCGGATGCCGATGATCTGATGCTGGCTGA
3215673	+	223016	primary,	P:gene_id "EG30046"; gene_name "ileX";	AGGCGACTCATAATCGCTTGGTCGCTGGTTCAAGTCCAGCAGGGGCCACCAGATATAGCAA
3238482	+	25071.7	orphan		TCCGGTCACCGGGCAACCCGAAAGGAATACGCAGACGTATTCCTTTTTTGTTGTAAGTGAG
3239923	+	20906.5	orphan		TGTTACATCCTGAAAGATGCGTCGACAGAACGCACCAGGGATGTGCGACAACACAATGAAA
3249405	+	856.794	internal,	I:gene_id "G7612"; gene_name "yqjD";	TTACTCACCTGGAGAAAACTATGTCGAAAGAACACACTACGGAACATCTGCGTGCTGAGTT
3250409	+	1408.19	primary,	P:gene_id "G7614"; gene_name "yqjK";	CAACAGCTTCGCGGTTAACTTCCCTCTGGCCGGAGCCATTCCGGCCTTATCCCTCAAATTT
3255325	+	2400.74	antisense,	A:gene_id "G7622"; gene_name "yhaM";	AAACAACCCGTAGGCCGGACAAGATGCGCCAGCATCGCATCCGGCACGATCCCCAAAACCT
3270216	-	24190750	primary,	P:gene_id "EG30069"; gene_name "rnpB";	TAGATGAATGACTGTCCACGACAGAACCCGGCTTATCGGTCAGTTTCACCTGATTTACGTA
3278188	-	64109.2	internal,	I:gene_id "G7630"; gene_name "agaR";	CGTTGCTGGAAGCGGAAGGCGTTGAGCTGCTGATGACCGGCGGGCATTTGCGCCGTCAGTC
3286304	+	941.62	primary, internal,	P:gene_id "G7635"; gene_name "agaD";,I:gene_id "G7636"; gene_name "agaI";	ATTCGGCATTTTGTAAATGGAACGAGGCACTGCGTCTGGTGGTGCCTCTTTACTTAAGGAA
3287795	-	23751.4	antisense,	A:gene_id "G7637"; gene_name "yraH";	TGGCATAATGTTTCCGCTTTCCGCATCGTCAATACGGATACCCACACCTGTTGCCGCTATG
3295941	+	1009.49	internal,	I:gene_id "EG12780"; gene_name "diaA";	CCCGTGCAGCCATGACGCTGGTTCAGTCTCTGCTCAATGGCAACAAAATCCTCTGTTGTGG
3298255	+	1102.8	antisense,	A:gene_id "G7646"; gene_name "yraR";	GAATAATTATTCAGCTCTTTTGCGTAATTCTGAAGAGCTTAAAATCGTCACGCCTTCATGC
3308608	-	367484	internal,	I:gene_id "EG12371"; gene_name "nlpI";	GGCAATCCGACCGGATATGCCTGAAGTATTCAATTACTTAGGCATATATTTAACGCAGGCA
3308994	-	31743.8	primary,	P:gene_id "EG10743"; gene_name "pnp";	CAGGGCGAGTAAGGTTGCCATTTGCCCTCCGCTGCGGCGGGGGGCTTTTAACCGGGCAGGA
3311287	-	2197335	antisense,	A:gene_id "G0-8870"; gene_name "psrO";	GTATTGTTGCTATGAATGATCTTCCGTTGCAGAGGTTCGCGCGGCTAATGAGAGGCTTTAC
3311515	-	48067.7	internal,	I:gene_id "EG10914"; gene_name "rpsO";	GGGCCACTTTGCAGAGCACAAAAAAGATCACCACAGCCGTCGTGGTCTGCTGCGCATGGTT
3311708	-	387818	orphan		TTTGCGTAACGTACACTGGGATCGCTGAATTAGAGATCGGCGTCCTTTCATTCTATATACT
3318213	-	28578150	primary,	P:gene_id "EG30061"; gene_name "metY";	GTCGGGCTCATAACCCGAAGATCGTCGGTTCAAATCCGGCCCCCGCAACCACTTTCCCTTA
3322072	-	68036600	primary,	P:gene_id "EG30050"; gene_name "leuU";	GGTGGTAGTGCCCAATAGGGCTTACGGGTTCAAGTCCCGTCCTCGGTACCAAATTCCAGAA
3322299	-	132511	internal,	I:gene_id "EG12095"; gene_name "secG";	ACCCGCATGACGGCGCTGCTGGCAACGTTATTCTTCATCATCAGTCTGGTGCTGGGTAACA
3322542	-	24033.8	orphan		CACCCGCTTCAGTGGGAAAGATTAAAAACTCCCGCTTTATTGGTTGAAGCATTGGTACGCG
3322686	-	34342.1	primary,	P:gene_id "EG11553"; gene_name "glmM";	TTAAAGCGTTAGATAACTGGCTAAAAAGGCGGCGATTGTCGCCTTTTTTCTCAGCGAACAC
3328068	-	150614	antisense,	A:gene_id "EG12794"; gene_name "yhbY";	TTTACACAGCAAATGTGTGTAACTTTAGGATAATCTTAGCGTGGCAGCGAGATTTTACGTT
3328197	+	35102.7	antisense,	A:gene_id "EG10415"; gene_name "greA";	AAAATGCCACGCTCTGTTCGTTGATAAAAGGCCGCATAGCGGCCTTTTTCCTTTCTTTACA
3328811	-	65238.7	orphan		AAAATGTGAATTGTAGCTGACCTGGGACTTGTACCCGGGTCGGTATTTTTTTGCTTCTGGT
3332824	-	165470	primary,	P:gene_id "EG50002"; gene_name "rpmA";	CGAAGCTGAATAAGTTTTTCGCGTCCCGGTAACGGATGAAAGCCCCGCAACACGTTGCGGG
3332966	-	60098.8	internal,	I:gene_id "EG50002"; gene_name "rpmA";	GCATCATCGTTCGTCAACGTGGTACCAAATTCCACGCTGGCGCTAACGTAGGTTGCGGTCG
3333459	-	73259.4	orphan		GAATATTTATAGCGCACTCTGAATCATTGAAAAGGTGTGCGCGGAAGCGGAGTTTTATATG
3335196	-	40640.1	primary, antisense,	P:gene_id "EG11358"; gene_name "murA";,A:gene_id "EG10656"; gene_name "sfsB";	AAAGGCGAATAATCGTCTGAGAGCTGGCAGCCCCGTTCGCGGGGCTACCGCCAGACCACTC
3336874	-	45215.2	orphan		GCAAACCTGCCTGCAAGTCGAGCCTTGTCTGATTTATCAGCGAGGCTTTTTGCTTATTTAT
3342985	+	1726.31	internal,	I:gene_id "G7664"; gene_name "lptC";	GTCGTCAACAACAATGATCCCACCTATAAAAGCGAGCATACGGACACGCTCGTCTATAACC
3348581	+	5938.16	internal,	I:gene_id "G7667"; gene_name "yrbL";	GCTGTATCAAGATTGTCTACCATCGTGGCGATGGTGGCGATAAAGAGATCCGCCGTGAGTT
3349181	+	5081.37	antisense,	A:gene_id "G7668"; gene_name "mtgA";	TCTGCCGTAAAATCCACGCCTGACGGCTACGCACGTAGCCCGATGGCGAGGAGACTTTGAA
3350696	+	50512.2	internal, antisense,	I:gene_id "G0-8871"; gene_name "arcZ";,A:gene_id "EG10062"; gene_name "arcB";	CCTGGTGTTGGCGCAGTATTCGCGCACCCCGGTCTAGCCGGGGTCATTTTTTAGTGGCTTT
3373531	-	54365.6	internal,	I:gene_id "EG10637"; gene_name "nanA";	TATTTATGGCAACGAATTTACGTGGCGTAATGGCTGCACTCCTGACTCCTTTTGACCAACA
3374407	-	27197	internal,	I:gene_id "G7678"; gene_name "nanR";	CGAAGATTCTTCACCTGCAATTGGTCGCAACTTGCGTAGCCGCCCGCTGGCGCGTAAAAAA
3376247	-	24033.8	primary, antisense,	P:gene_id "EG10978"; gene_name "sspB";,A:gene_id "G7679"; gene_name "dcuD";	ATTACGCGTTGTGAAGTAATACAAAACAGGCCCAGGCGGCCTGTTTTGTCTTTTTAATGAC
3377335	-	29202.2	internal,	I:gene_id "EG10977"; gene_name "sspA";	GCTGTTTTCCGGTCCTACTGACATCTATAGCCATCAGGTCCGCATTGTGCTGGCTGAGAAA
3377788	-	39482.1	primary,	P:gene_id "EG10908"; gene_name "rpsI";	CGTCCGCAGTTCTCCAAACGTTAATTGGCTTCTGCTCCGGCAGAAAACAATTTTCGAAAAA
3378418	-	23469	internal,	I:gene_id "EG10874"; gene_name "rplM";	GTTGCTGTAACCGGCAACAAGCGTACTGACAAAGTGTACTATCACCACACCGGCCACATCG
3378723	-	724234	orphan		TTTTGTGTGCTGGCATAGGCTATTCGAAGGGGTAGGTTTGCCGGACTTTGTCGTGTGAACC
3380623	+	8368.56	primary,	P:gene_id "G7681"; gene_name "yhcB";	GCGCGAAGCGCGACTAATTTATTTTTCGGGCGCAGCCATTGCGCCCTCCTCTTCTCTCCCT
3385042	-	23751.4	antisense,	A:gene_id "EG10070"; gene_name "argR";	GGTGTCATCGCCAGCGATGGTGCCCAGAATACCTTCTGCTTTGCCCAGTGAGTCCAGCAGG
3385206	+	1633	primary,	P:gene_id "EG10070"; gene_name "argR";	TTCGACCAGGAGCTTTAATCTCTGCCCCGTCGTTTCTGACGGCGGGGAAAATGTTGCTTAT
3392339	-	40640.1	orphan		ATAACCGTAGGTCGGATAGGGCGTTCACGCCGCATCCGGCAGCCGTTGCCTGATGCGACGC
3399996	-	60098.8	primary,	P:gene_id "EG10608"; gene_name "mreB";	TAATCGGATGCAGGCAGGGGAAGTGTCTGTTTACCCTGCCTGGTCTGATACGAGAATACGC
3404827	+	788.921	orphan		ATCACTCGAACCTATTTAATGCTGAGCATTGTCAATCGGTTAATTTTGCGTGCTTTAGCAT
3405373	+	1013.73	orphan		TCCCGGCCTGCTGGAATTTATCGCTATGCATACAGCTGTCGGGGCATACGCTTTACAGACG
3410852	+	1327.61	internal,	I:gene_id "EG11311"; gene_name "dusB";	TGTTTGTTCAATGGAGAAGCTGAGTACGACAGTATTCGGGCAGTTAAGCAGAAAGTTTCCA
3410997	+	1560.89	internal,	I:gene_id "EG11311"; gene_name "dusB";	TAGGCCGCGCAGCTCAGGGAAGACCCTGGATCTTTCGGGAAATCCAGCATTATCTGGACAC
3411166	+	2833.34	internal,	I:gene_id "EG11311"; gene_name "dusB";	ACGTAAACACGTTTCCTGGTATCTCCAGGAACACGCTCCAAATGACCAGTTTCGGCGCACA
3423580	-	698815000	primary,	P:gene_id "EG30103"; gene_name "thrV";	GCACCCTTGGTAAGGGTGAGGTCCCCAGTTCGACTCTGGGTATCAGCACCACTTTTTAGGT
3426791	-	329668	orphan		TTGTTCGTGAGTCTCTCAAATTTTCGCAACTCTGAAGTGAAACATCTTCGGGTTGTGAGGT
3428984	-	85008.1	orphan		CGTGAAACACTTCACAGGATGGTCGGAACAACGAAGAGAAAAAAATCCTGAAATTCAGGGT
3429912	+	1005.26	antisense,	A:gene_id "G7697"; gene_name "yrdB";	CGCTAACCACTGTTCTGGCGTATCTCCAGTAAAGCGATACGCCAGACTCTCGCCAGAGATC
3431798	-	30614.2	internal,	I:gene_id "G7699"; gene_name "yrdD";	CCGGCGTGTGACTACGTCCGTCCTCTGAAATCTTCAGCGGATGGACATATCGTCAAAGTTC
3432256	-	23469	internal,	I:gene_id "EG11605"; gene_name "smg";	TCAGGAAGGGTTGGCAGAACCGATGCAACTGGCCTCGGATCCTCTCTCCATGCGTATTTAT
3432463	-	23469	internal,	I:gene_id "EG11605"; gene_name "smg";, gene_id "EG11604"; gene_name "smf";	TGGATCGCAGCTGTACCCGGCGGCTATGTCCGATTGAGGAGGGCATGCCATGTTCGACGTA
3433762	+	1968.07	internal,	I:gene_id "EG11440"; gene_name "def";	ATATTCCGGACGAGCGGCTTCGCAAAGTTGCTAAACCGGTAGAAGAAGTGAATGCAGAAAT
3434286	+	5484.31	internal,	I:gene_id "EG11268"; gene_name "fmt";	TTTTTGCGGGTACACCTGACTTTGCAGCGCGTCATCTCGACGCGCTGTTGTCTTCTGGTCA
3435199	+	2260.75	primary,	P:gene_id "EG11268"; gene_name "fmt";	CCGTCTGGTCTGATAGTCCACTCTTCTAAGCCCGGTCTTGCCGGGCGTTTTTATACTTATG
3438498	+	8682.43	antisense,	A:gene_id "G0-10465"; gene_name "arfA";	GCAGAAGACCAGTGGTAAAAAAGTGATTTACTTTCTTGCCACTGGCCTCCCAGTTCCCCCG
3439590	-	25474.2	primary,	P:gene_id "EG10878"; gene_name "rplQ";	GAAAGCAGAAGCTGCTGCAGAGTAATCTGAAGCAACGTAAAAAAACCCGCCCCGGCGGGTT
3439839	-	48943.2	internal,	I:gene_id "EG10878"; gene_name "rplQ";	TCTGCCTAAAGCGAAAGAGCTGCGCCGCGTAGTTGAGCCGCTGATTACTCTTGCCAAGACT
3440021	-	43210.1	primary,	P:gene_id "EG10893"; gene_name "rpoA";	ACTGGCCACCGGCAAGCATCGCTGACGAGTAACCGGATCACAGGTTAAGGTTTTACTGAGA
3440559	-	25474.2	internal,	I:gene_id "EG10893"; gene_name "rpoA";	AGCATGCGTATCAAAGTTCAGCGCGGTCGTGGTTATGTGCCGGCTTCTACCCGAATTCATT
3441143	-	45215.2	internal,	I:gene_id "EG10903"; gene_name "rpsD";	GGCTGAGCAGCGTGAAAAGCCAACCTGGCTGGAAGTTGATGCTGGCAAGATGGAAGGTACG
3442149	-	32337	internal,	I:gene_id "EG10912"; gene_name "rpsM";	TCGTCGTGGTCTCCCGGTTCGCGGTCAGCGTACCAAGACCAACGCACGTACCCGTAAGGGT
3442438	-	539676	internal,	I:gene_id "EG10912"; gene_name "rpsM";	AATAGTAGGAGTGCATAGTGGCCCGTATAGCAGGCATTAACATTCCTGATCATAAGCATGC
3442846	-	202890	internal,	I:gene_id "EG10766"; gene_name "secY";	TCGGTGGGACCTCACTGCTTATCGTTGTTGTCGTGATTATGGACTTTATGGCTCAAGTGCA
3443246	-	93028.9	internal,	I:gene_id "EG10766"; gene_name "secY";	AAAGTGAATATGGCGGGGGTAATCCCGGCAATCTTCGCTTCCAGTATTATTCTGTTCCCGG
3443628	-	132482	internal,	I:gene_id "EG10766"; gene_name "secY";	GAATATGCCTGGTATGCAAGGCCTGGTGATTAACCCGGGCTTTGCATTCTACTTCACCGCT
3443881	-	69531.5	internal,	I:gene_id "EG10766"; gene_name "secY";	AGCGAGGCACCATCATTGAGATGTTTAACATGTTCTCTGGTGGTGCTCTCAGCCGTGCTTC
3444573	-	54958.8	internal,	I:gene_id "EG10888"; gene_name "rpmD";	CACACCGTAGAGCGCGAGGATACTCCTGCTATTCGCGGTATGATCAACGCGGTTTCCTTCA
3445418	-	55241.2	internal,	I:gene_id "EG10879"; gene_name "rplR";	GGTTCTGAAGTTCTGGTAGCTGCTTCTACTGTAGAAAAAGCTATCGCTGAACAACTGAAGT
3445555	-	27479.3	internal,	I:gene_id "EG10879"; gene_name "rplR";	GTAACACTATGGATAAGAAATCTGCTCGTATCCGTCGTGCGACCCGCGCACGCCGCAAGCT
3445946	-	43210.1	internal,	I:gene_id "EG10869"; gene_name "rplF";	ACCCTGACCTTCGGTCCGCGTGATGGTTACGCAGACGGTTGGGCACAGGCTGGTACCGCGC
3447351	-	85290.6	internal,	I:gene_id "EG10868"; gene_name "rplE";	TTAAAAAACTCATGACTGAGTTTAACTACAATTCTGTCATGCAAGTCCCTCGGGTCGAGAA
3447468	-	22904.2	internal,	I:gene_id "EG10884"; gene_name "rplX";	GGCTTTAGATTCGAAGACGGTAAAAAAGTCCGTTTCTTCAAGTCTAACAGCGAAACTATCA
3447860	-	34624.6	internal,	I:gene_id "EG10875"; gene_name "rplN";	TGGTAATGCTTGTGTTCTTCTGAACAACAACAGCGAGCAGCCTATCGGTACGCGTATTTTT
3448054	-	52360.4	internal,	I:gene_id "EG10875"; gene_name "rplN";	GCACGTCGCGTAATGTGTATCAAGGTTCTGGGTGGCTCGCACCGTCGCTACGCAGGCGTAG
3449016	-	92153.3	internal,	I:gene_id "EG10877"; gene_name "rplP";	CTGTTGGCCGTGGTCGTCTGACTGCCCGTCAGATCGAAGCAGCACGTCGTGCTATGACCCG
3450366	-	579920	internal,	I:gene_id "EG10918"; gene_name "rpsS";	TTCAACGATCTTTCCTAACATGATCGGTTTGACCATCGCTGTCCATAATGGTCGTCAGCAC
3451412	-	24316.2	internal,	I:gene_id "EG10883"; gene_name "rplW";	GGTCGTCGTAGCGACTGGAAAAAAGCTTACGTCACCCTGAAAGAAGGCCAGAATCTGGACT
3452847	-	24033.8	internal,	I:gene_id "EG10866"; gene_name "rplC";	TATGACCCGTATCTTCACAGAAGACGGCGTTTCTATCCCAGTAACCGTAATCGAAGTTGAA
3453304	-	780265	orphan		AAGAACGGTTACACTCTCCCATCAATCGTAATGGGTCTGAGGAGTAATCATTTTCGTTTAT
3466218	-	45215.2	primary, antisense,	P:gene_id "EG10113"; gene_name "bfr";,A:gene_id "EG11359"; gene_name "gspO";	AGATCCGCGAAGAAGGTTGAGCCGTGTCGGGAGGGAGAACCCTCCCGGTTAATAAGAGATC
3470093	-	89837.6	orphan		TACACGTTAATTAGTTTTGAATTGAAAAGGGCGCTTCGGCGCCCTTTTTGCATTTGTTGAC
3471345	-	77552.2	orphan		AAGGGTTAATACCAAAGTCCCGTGCTCTCTCCTGAAGGGGAGAGCACTATAGTAAGGAATA
3471536	-	56370.8	internal,	I:gene_id "EG10360"; gene_name "fusA";	AGGTCAGGAATCTGAAGTTACTGGCGTTAAGATCCACGCTGAAGTACCGCTGTCTGAAATG
3471923	-	22904.2	internal,	I:gene_id "EG10360"; gene_name "fusA";	GTATGGTCATGTTGTTATCGACATGTACCCGCTGGAGCCGGGTTCAAACCCGAAAGGCTAC
3472742	-	36064.9	internal,	I:gene_id "EG10360"; gene_name "fusA";	AGAACTGACTGAAGCAGAAATCAAAGGTGCTCTGCGTCAGCGCGTTCTGAACAACGAAATC
3473555	-	106444	internal,	I:gene_id "EG10906"; gene_name "rpsG";	TCGGAGTTTTAGTCACCAGGCGGGCGCTTCCAGTAAGCAGCCCGCTTTGGGCTACTTAAAT
3474080	-	74699.9	internal,	I:gene_id "EG10906"; gene_name "rpsG";	TAAACTCGTAGAGTTTTGGACAATCCTGAATTAACAACGGAGTATTTCCATGCCACGTCGT
3477880	-	30331.8	primary, antisense,	P:gene_id "EG11663"; gene_name "slyD";,A:gene_id "EG11664"; gene_name "slyX";	AACGGCGGTTGCGGTTGCCACTAATACCGAAAAAGTGACAAAAAAGCGGGGAATCCCCGCT
3477893	+	869.508	primary, antisense,	P:gene_id "EG11664"; gene_name "slyX";,A:gene_id "EG11663"; gene_name "slyD";	ACCGCCACATTATTGAGGCGTAAAAAAAGCGGGGATTCCCCGCTTTTTTGTCACTTTTTCG
3477903	-	30331.8	primary, antisense,	P:gene_id "EG11663"; gene_name "slyD";,A:gene_id "EG11664"; gene_name "slyX";	AAGGCTGCTGTGGCGGTAAAGGCAACGGCGGTTGCGGTTGCCACTAATACCGAAAAAGTGA
3485367	-	61539.1	primary, antisense,	P:gene_id "EG11182"; gene_name "yhfA";,A:gene_id "EG12365"; gene_name "prkB";	GTGACTTAACTATCCCGTTGTGAAGCCGGATAGTATTTTATCCGGCGTAATAGCAGAGTTA
3485512	-	39228.1	internal,	I:gene_id "EG11182"; gene_name "yhfA";	ATCTGCATTTTATCGTCACCGGTCGCGACCTGAAAGACGCAGCGGTTGCGCGTGCGGTTGA
3486117	+	5149.24	orphan		GACAGCGGCGTTATCTGGCTCTGGAGAAAGCTTATAACAGAGGATAACCGCGCATGGTGCT
3486298	+	941.62	internal,	I:gene_id "EG10164"; gene_name "crp";	CGTTAAAGGCTCTGTGGCAGTGCTGATCAAAGACGAAGAGGGTAAAGAAATGATCCTCTCC
3486794	+	8525.5	primary, internal,	P:gene_id "EG10164"; gene_name "crp";,I:gene_id "G7721"; gene_name "yhfK";	ACTCGTTAATCCCGTCGGAGTGGCGCGTTACCTGGTAGCGCGCCATTTTGTTTCCCCCGAT
3516762	-	24316.2	internal,	I:gene_id "EG11183"; gene_name "damX";	AAATACTCAGCAGGATGTTTCTCTGCCACCGATCTCTTCTACGCCGACTCAAGGGCAAACC
3519005	-	97010.9	internal,	I:gene_id "EG10081"; gene_name "aroK";	AAACGCAATATCTTTCTGGTTGGGCCTATGGGTGCCGGAAAAAGCACTATTGGGCGCCAGT
3519136	-	23469	orphan		GTATTGAGATAATTTTCAGTCTGACTCTCGCAATATCTTATGAGGTTTCAGTTCATGTCCT
3519310	-	58093.6	orphan		TCGCTGCCTGCGTTCCATGATGATGATTTATCATTCAGGCGGCATTTTGCTGTCTTTTTTA
3528549	+	1102.8	internal,	I:gene_id "G7741"; gene_name "yrfF";	GCGTCGTTACCAGCGTCATCGCACTCGCATGATGGAGATTCAGGCCTATTATGAAAGCTGC
3532969	+	852.557	internal,	I:gene_id "EG10688"; gene_name "pck";	GGAAGAGCTCGATCCGAGCCTGACAGGTTATGAGCGCGGGGTGTTAACTAATCTGGGTGCC
3537341	+	1017.97	orphan		AAGAGTCTTAACCTCCTGCCGATGGCTGGCATTTTTGCCAGCCAGTCCGTATAACTATCCC
3546256	+	933.144	orphan		CCCTCTTTTGTAGATTGCCCGATGCGACGCTAAAGCGTCATTTCGGGCCTACGTTGAACAT
3547882	-	143949	antisense,	A:gene_id "EG12380"; gene_name "gntT";	TCATCCCGAATCGTAGGCCGGATAAGGCGGTCACGCCGCATCCGGCAGTCAGTGTTATCAA
3547980	+	1654.19	antisense,	A:gene_id "EG10561"; gene_name "malQ";	TGAATTAGTAGGCCGGATAAGACGCGTCAAGCATCGCATCCGGCATCAACCGCACTCTACT
3553086	+	1353.03	internal,	I:gene_id "EG10562"; gene_name "malT";	GCGCAAAAAAAATAATATTTCCTCATTTTCCACAGTGAAGTGATTAACTATGCTGATTCCG
3553411	+	869.508	internal,	I:gene_id "EG10562"; gene_name "malT";	TGTGAGACGATGGCGCAAAAACGGCAATATGCCAGCCTGACGTCACTCTTCGCCCAGCTTT
3562029	+	1327.61	internal,	I:gene_id "EG10394"; gene_name "glpD";	TTTATGAGCTTTAACGAAAGTGAATGAGGGCAGCATGGAAACCAAAGATCTGATTGTGATA
3562232	+	1391.24	internal,	I:gene_id "EG10394"; gene_name "glpD";	AGCACTATGAATTCCGCCTGGTCAGCGAGGCGCTGGCTGAACGTGAAGTGCTGCTGAAAAT
3562574	+	856.794	internal,	I:gene_id "EG10394"; gene_name "glpD";	GCGCCACCTCTGCTCGCCGCGAAAACGGCCTGTGGATTGTGGAAGCGGAAGATATCGATAC
3563081	+	933.144	internal,	I:gene_id "EG10394"; gene_name "glpD";	ATGAAAATGGCAAAGCACCGCTGCTGTCGGTATTCGGCGGTAAGCTGACCACCTACCGAAA
3563562	+	2103.81	primary,	P:gene_id "EG10394"; gene_name "glpD";	GTCGTAAATTAACGTAAGGTGATCAGGTCAGATTTCAATCTGGCCTGAGACTGATGACAAA
3563685	+	3299.91	antisense,	A:gene_id "G7752"; gene_name "yzgL";	TGCATGGTCTTGTAGGCCAGATAAGACGTTCACGTCGCATCCGGCATGAACAAAGCGCACT
3578650	-	24598.6	internal,	I:gene_id "EG12630"; gene_name "gntR";	GGATGTGGCTGACCGTGTAGGCGTGACCAAAATGACGGTCAGCCGTTTTTTACGCAACCCG
3579057	+	933.144	antisense,	A:gene_id "G7756"; gene_name "yhhW";	GATTGCCTGCTCATCCCAGATTGCCAGACCATCGCTGGTCGAGGCTTTCACGCCGTTAATG
3580963	-	53264.4	internal,	I:gene_id "G0-8872"; gene_name "ryhB";	ATCAGGAAGACCCTCGCGGAGAACCTGAAAGCACGACATTGCTCACATTGCTTCCAGTATT
3586994	+	2672.16	internal,	I:gene_id "EG11184"; gene_name "yhhA";	TGAAACGACTTCTGATTCTTACGGCACTCCTGCCGTTTGTCGGCTTTGCACAGCCCATTAA
3600404	-	26914.6	internal,	I:gene_id "EG10897"; gene_name "rpoH";	AGCAGAGATCCACGAATACGTTCTGCGTAACTGGCGTATCGTCAAAGTTGCGACCACCAAA
3600515	-	31207.3	internal,	I:gene_id "EG10897"; gene_name "rpoH";	GCCACAGGCGGATTTGATTCAGGAAGGTAACATCGGCCTGATGAAAGCAGTGCGCCGTTTC
3600804	-	262424	orphan		GTTGCTCTTAAGCTCTGGCACAGTTGTTGCTACCACTGAAGCGCCAGAAGATATCGATTGA
3604211	-	23186.7	internal,	I:gene_id "EG10346"; gene_name "ftsY";	CGAGGAGTGTAGTCGCAAATGGCGAAAGAAAAAAAACGTGGCTTTTTTTCCTGGCTGGGCT
3605158	-	26914.6	antisense,	A:gene_id "EG12212"; gene_name "yhhL";	TCAAACACGCCGAAAAGGAAAATCCGTACCTTTTCGGCGGTGGTCATCTGCGGGCCATCTT
3605771	+	1022.21	internal,	I:gene_id "EG12214"; gene_name "yhhN";	ACGAAAAAATAACGAATTCAAGGAACTAAGATGCTTTGGTCGTTTATCGCTGTCTGTCTTT
3609992	+	2502.51	internal,	I:gene_id "G7767"; gene_name "dcrB";	AAGGAAGAAGTCAATGCGCAATCTGGTTAAATATGTCGGAATTGGCCTGCTGGTTATGGGG
3630645	-	27479.3	orphan		CCTTCTTATCCCGGATGGAAGAATCCGCTGAACGTCGTTCGGCGGCAGTTGTAACACGCGT
3630827	-	321364	orphan		GCGTGAAACGCTATCCAACAGGATGGATACCGTTTTGTCAGCCAGTTTTATAGATCACACT
3640022	+	9199.92	orphan		TAAGGTAAGGATGGTCTTAACACTGAATCTTTACGGCTGGGTTAGCCCCGCGCACGTAGTT
3647653	-	525722	antisense,	A:gene_id "EG10412"; gene_name "gor";	AGCGGAAACGTAATTAAGGGCTAAGAGCACACTACTCTTAGCCCTTTAACATTTAACGCAT
3648147	+	14514.4	primary,	P:gene_id "G0-10751"; gene_name "agrA";	CCAACTCAGGGCTGGAAAGTAAAAAACCGACGCAAAGTCGGTTTTTTTACATCCGGATTCG
3648377	+	3032.65	primary,	P:gene_id "G0-10752"; gene_name "agrB";	ACCAACTCAGGGCTGGAAAGTAAAAAACCGACGCAAAGTCGGTTTTTTTACGTCCTGATTC
3656318	-	24033.8	orphan		ACAGGCCGGAATATCTTCTTTAAAAGCAGCTATTCCTCCTGTTCATATATAATCTCTATAT
3664969	+	18565	primary, antisense,	P:gene_id "G0-8914"; gene_name "gadY";,A:gene_id "EG12243"; gene_name "gadX";	CTGGAGACGGCAGACTATCCTCTTCCCGGTCCCCTATGCCGGGTTTTTTTTATGTCTGAGT
3671519	+	1425.14	antisense,	A:gene_id "EG12246"; gene_name "yhjB";	TAACGATTTGAGATCTTTAATGTCCTTTTCCGGCGTCGTCCGCCAGTCTCCAGGCAGAAAC
3682061	-	65831.9	orphan		ATAATTGACCCCTGTGCCTGAACTTACCACCTGGGTGAGTTCAGGTTTATTTCACTTCTTC
3683250	-	48378.4	internal,	I:gene_id "EG20044"; gene_name "dctA";	GCTCCTGTCATCTTTTGTACCGTCGTAACGGGCATTGCGGGCATGGAAAGCATGAAGGCGG
3696237	-	24033.8	orphan		AGTGAGCAAATTCCCGTCTCGCCGTAAACAATAAACCGGCGAAATGCTCACGGTTAGAATT
3696560	+	1166.43	internal,	I:gene_id "EG12263"; gene_name "bcsE";	ATGAGCTGCGACATATGCCAGCAGGCGGCGTCTGGTGGTTTAACGTCGATCGCCATGAAGA
3699668	+	2723.08	internal,	I:gene_id "EG12265"; gene_name "bcsG";	CCCGTTGGGGTGAAATTCTTCGGCATGAAGGCACCGCATCAGGGGGCACCGATTGTCATCG
3700201	+	8796.92	primary,	P:gene_id "G0-9042"; gene_name "rdlD";	TAGCCCCCGTGGTGTTGTCAGGTGCATACCTGCAACGTGCGGGGGTTTTCTCTCTCCAGCA
3705889	-	46344.8	orphan		CAATCTGTATACCCGGTGGCGCTGTGCCTCTGCGTGCAGCGCCATCCGGCAGCAATACTTC
3706376	+	937.381	antisense,	A:gene_id "EG10248"; gene_name "dppA";	TGAGTAGTTGGAGCCTTGTTCAGAGGCGGCGCAGCTGAACAGGGTGGCGAAGAAGTTATCC
3707800	-	804330	orphan		GATCCGCACTGTTACACTGATGTTAATTAGTACGGCATCCCCACCTCATAACGTTGACCCG
3708616	-	145977000	primary,	P:gene_id "EG30066"; gene_name "proK";	ACTTCGTTCGGGACGAAGGGGTCGGAGGTTCGAATCCTCTATCACCGACCAAATTCGAAAA
3710464	-	63544.3	internal,	I:gene_id "EG12267"; gene_name "eptB";	AGCAGGGTGTTATCACCTGTTTGTCCAGGGTTTGTTTGCATGAGATACATCAAATCGATTA
3717247	+	1098.56	primary,	P:gene_id "EG12271"; gene_name "yiaD";	CCCGCTGTAATCCCTTTCATGCCAGGTGATGCAGAAATCACCTGGCATTCTTCAGTTTTCC
3718264	-	33184.2	antisense,	A:gene_id "EG12272"; gene_name "ghrB";	TTATCGGGCTTTACTCTACGCAGTCGCGGCTTAGTCCGCGACGTGCGGATTCACACAGTTC
3720313	+	157794	orphan		CTCTGCTTAAAAGCACAGAATCTAAGATCCCTGCCATTTGGCGGGGATTTTTTTATTTGTT
3720444	+	3528.95	antisense,	A:gene_id "G0-9613"; gene_name "hokA";	ATGAGAATGCGCAACGCCGTAAGTAAGGCGGGAATAATTTCCCGCCGAAGACTCTTACTCT
3721992	-	191424	antisense,	A:gene_id "G0-10624"; gene_name "insJK";, gene_id "G7777"; gene_name "insK";	CGAGGCATATAGGTCTGATTCCGATATTCAATTGGAGTCAGACCTTTTAATTTCAGGCTAA
3732416	-	25474.2	antisense,	A:gene_id "EG12275"; gene_name "xylG";	TCCTGATGAATGATGGCGATACCTTTGCGTTCGGTATCGCGGATGTGACTCGCCTGAATCT
3737011	-	228364	internal,	I:gene_id "EG11360"; gene_name "bax";	CTTAACTAAAGCTAGTAATAAACAGGTAAGCAGTAAACAAGAGTATTCTCGCAATAGTGCA
3737166	-	25474.2	internal,	I:gene_id "EG11360"; gene_name "bax";	ATAAGGTGTTGGAATGATTAAATCCGACCAGGAGACCTGATGATTTTGACTCCCATACGAC
3741106	+	933.144	antisense,	A:gene_id "EG12277"; gene_name "ysaA";	TCTGGCATAAACAAAGCGCACTGTTCCGGCGTTGAGAAACGCCGGAAAACGTTTCAAACAG
3766993	+	945.857	internal,	I:gene_id "EG11187"; gene_name "yibA";	GATAAAAATGAGGAAGTCCGTATTGAAGCAATAATCGGACTTTCCTACAGAAAAGATAAAA
3767780	+	1628.76	internal,	I:gene_id "EG11766"; gene_name "yibJ";	GATTAATATCCCAGGCGTTTTCACAATCGGGGGGCATGGTACCCCCACATCTATTGAATCC
3775997	-	31772.2	antisense,	A:gene_id "EG11965"; gene_name "mtlR";	CTGGAGTCTGCTGGTTCAAACTGTGGCGGCGGTGGTAACGCCGCCACGCAGTGCAGTTCAC
3777388	+	1251.26	orphan		GTGACAAGGAGATGAGCAACAGACTCATTACACGATGTGCGTGGACTCCAGGAGACCTGCA
3779156	+	5654.02	internal,	I:gene_id "EG11962"; gene_name "lldR";	CGCTGATTGATGAAAAAAACCTGGAAGCGGGCATGAAGTTGCCCGCTGAGCGCCAACTGGC
3779336	+	3223.56	internal,	I:gene_id "EG11962"; gene_name "lldR";	GGTCGGAGCAAAACATCGTCCAGCCGCTAAAAACACTGATGGCCGATGATCCGGATTACAG
3781065	+	1017.97	primary,	P:gene_id "EG11963"; gene_name "lldD";	TAGTCGTTTGCGCCCCCTCACCCTAACCCTCTCCCTCAGGGAGAGGGGACCGTTCGGCGCT
3781218	+	1467.59	internal,	I:gene_id "EG11888"; gene_name "trmL";	CTGCTCACCAATTTTCTGCTATCCTGCCCCCGCACTAAGGGGGCAGTATGCTAAACATCGT
3782582	-	46938.1	orphan		ACCTTTGTTACCGCTATGACCCGGCCCGCGCAGAACGGGCCGGTCATTATCTCATCGTGTG
3783602	-	161148	internal,	I:gene_id "EG20091"; gene_name "gpsA";	CGTAATGCTTCAATGACTGTGATCGGTGCCGGCTCGTACGGCACCGCTCTTGCCATCACCC
3784133	-	24909.4	orphan		ACGTTGGCATTACATTGCGCAGTATTTAAGGACAACACTTAAGGGTTTTCTACACATGTCA
3784502	-	32054.5	orphan		TAGCTGCAATTAGGCCCCCAGCGACTTATTGTTATAAGCTTCTGGGGACACTCCATTTTGC
3786938	+	928.907	internal,	I:gene_id "EG12297"; gene_name "envC";	CGCCAGCGTTCTTAGCGCTGGCGTATTGTTGTGCGCCTTTTCCGCCCACGCGGATGAGCGT
3790287	-	45526	primary,	P:gene_id "EG10993"; gene_name "tdh";	ATTCTGAGCTGGGATTAACACGAACAAGGGCTGGTATTCCAGCCCTTTTATCTGAGGATAA
3792751	-	36629.7	orphan		TTTTGATACCAACTGAGATAGGAAAAATGATGCTTTGGCATCATTTTTTCTTTTTATATCA
3795067	+	784.683	internal,	I:gene_id "EG12210"; gene_name "waaF";	AGGCGATAATCGATGTGATGGCACCGGCATGGTGCCGTCCATTATTATCGCGGATGCCGGA
3798252	+	1085.84	primary, antisense,	P:gene_id "EG11424"; gene_name "waaL";,A:gene_id "EG11423"; gene_name "waaU";	AATTAAGAATAAACAAGTTTAAGAAGTGAGTTAAAACTCACTTCTTATCTATACAACTTAA
3808184	-	62668.8	orphan		AGTAAGTGCGTTATCAGTATTCAGGTAGCTGTTGAGCCTGGGGCGGTAGCGTGCTTTTTTC
3811202	-	940057	primary,	P:gene_id "EG10891"; gene_name "rpmG";	TAATTCTCGCTTTGATGTAACAAAAAACCTCGCTCCGGCGGGGTTTTTTGTTATCTGCTTG
3811735	-	226642	orphan		GGCCTGGCAATCGAGAGTTCACATAGAACTGCGATGACCGGGCTGTAAAGCCTGACGAGGC
3811957	-	67272.2	internal,	I:gene_id "EG11312"; gene_name "yicR";	AAACTCATTACTGAACGGATAATAAAGAGTTGTCAGTTCATGGATTTACGCGTGCTCGACC
3814447	+	1336.08	orphan		ATCCGAATAACGTCATAACATAGCCGCAAACATTTCGTTTGCGGTCATAGCGTGGGTGCCG
3817606	+	856.794	orphan		TTACTTTTCCGCCTTCACAAATGCCGCCACTCAAACAGAGCGGCATTTTTCTTCCCCGCAA
3821471	+	4682.67	internal,	I:gene_id "EG10965"; gene_name "gmk";	GATACTCATGGCTCAAGGCACGCTTTATATTGTTTCTGCCCCCAGTGGCGCGGGTAAATCC
3822481	+	1102.8	internal,	I:gene_id "EG10966"; gene_name "spoT";	TTCAAACCTACCTGCCGGAAGACCAAATCAAGCGTCTGCGGCAGGCGTATCTCGTTGCACG
3836316	+	3155360	primary,	P:gene_id "EG30092"; gene_name "selC";	TTGGGGCCGCCAGCGGTCCCGGGCAGGTTCGACTCCTGTGATCTTCCGCCAAAATGCCTCT
3852587	-	22904.2	internal,	I:gene_id "EG10494"; gene_name "ilvB";	ACGCAAATCCGCCATATTCTGGCCCGTCATGAACAGGGCGCGGGCTTTATCGCTCAGGGAA
3852831	-	385219	orphan		ACAACACACGATTCCAAAACCCCGCCGGCGCAAACCGGGCGGGGTTTTTCGTTTAAGCACC
3853116	-	236300	primary,	P:gene_id "G0-10201"; gene_name "istR-2";,gene_id "G0-10202"; gene_name "istR-1";	GTTACCAGCCGCAGGCGACTGACGAAACCTCGCTCCGGCGGGGTTTTTTGTTATCTGCAAT
3853441	+	1556.65	orphan		CTGAAACGGGTGGTGCCGTCAGCGCCTTAACCCCGCGTGAGCACACTGTGTTATGTCAACA
3855526	-	72948.6	internal,	I:gene_id "EG11694"; gene_name "yidF";	CAGGCATAAACTGGTTGTAGAGTACAAGGATGCTCTGCAACCTGCCGATTTTTATCACAAT
3866898	-	76140.2	orphan		GAATCTTCGGATTTGCAGGTACTTACTCGCTTCTTAGAAGGAGAAATGACTATGCGTAACT
3867477	-	52388.8	orphan		TTTTACATCGTAGCCGATGAGGACGCGCCTGATGGGTGTTCTGGCTACCTGACCTGTCCAT
3868543	+	2807.91	antisense,	A:gene_id "EG11713"; gene_name "yidR";	CGGGCAGGGTTGTTTCCGTTCCGCTTAACGGCGCATCACCTGCCGCTTTCCAGCCAGCTTC
3881679	-	45780.1	internal,	I:gene_id "EG10242"; gene_name "dnaN";	AAGGCGTGATTGAACTGATGCGTATGCTCGACGGCGGCGACAATCCGCTGCGCGTACAGAT
3883796	-	121638	orphan		ATAACCGCAGACAGCGGTTCGTGCGTCACCCTCAAGCAGGGTCTTTTCGACGTACGTCAAC
3884542	+	188731	internal,	I:gene_id "EG10862"; gene_name "rnpA";	AGTGGTTAAGCTCGCATTTCCCAGGGAGTTACGCTTGTTAACTCCCAGTCAATTCACATTC
3884971	+	937.381	internal,	I:gene_id "G0-10470"; gene_name "yidD";	ACCTGTTCAAGCTACGGAATTGAGGCATTGCGCAGGTTTGGAGTGATAAAAGGCAGTTGGT
3886768	+	1090.08	primary,	P:gene_id "EG11197"; gene_name "yidC";	CCTGATTCGGTGAGTTTTCGCTAAAATAAGGGCGGTCAGTTGACCGCCTTTTTTCTTTTCG
3888703	+	29720.7	orphan		ATCTGGCGAATTAATCGGTATAGCAGATGTAATATTCACAGGGATCACTGTAATTAAAATA
3890188	+	6192.7	primary,	P:gene_id "EG11005"; gene_name "tnaA";	AAGTTTAATTAATACTACAGAGTGGCTATAAGGATGTTAGCCACTCTCTTACCCTACATCC
3893895	+	1399.71	internal,	I:gene_id "EG11722"; gene_name "yieE";	TGTATTCATAATGGACCATTAAGCATGGAGCGAAAAATGGCGACTCACTTTGCCCGAGGGA
3904532	+	2192.88	antisense,	A:gene_id "EG10115"; gene_name "bglF";	TACCGCTGGTTCGGTGATACCAAACAGACTCGTCAACGCCGCTGATCCCGCCACCACTTTT
3906589	-	24033.8	orphan		CAGGCAAAACCTGACATAACCAGAGAATACTGGTGAAGTCGGGTTTTTTTGTTTATAAAAA
3907826	-	42362.8	internal,	I:gene_id "EG10783"; gene_name "pstB";	TTGCGCGTGGTATCGCCATTCGCCCGGAAGTGCTGCTGCTCGACGAACCGTGTTCGGCGCT
3911805	-	43492.4	primary,	P:gene_id "EG10382"; gene_name "glmS";	CGGTTACGGTTGAGTAATAAATGGATGCCCTGCGTAAGCGGGGCATTTTTCTTCCTGTTAT
3913520	-	25756.6	internal,	I:gene_id "EG10382"; gene_name "glmS";	TCTGGCCGTTGTTGATGCAGAAGGTCATATGACCCGCCTGCGTCGCCTCGGTAAAGTCCAG
3913689	-	23186.7	orphan		CAAGGCTCGGGGCGCCCGAAAAAACGGGCATACAGGTTGACCGACAACGATATAAATCGGA
3915151	-	31489.8	internal,	I:gene_id "EG11198"; gene_name "glmU";	TATGTTGAATAATGCTATGAGCGTAGTGATCCTTGCCGCAGGCAAAGGCACGCGCATGTAT
3915729	-	50383.6	internal,	I:gene_id "EG10100"; gene_name "atpC";	TGTCTGGCGGCATTCTTGAAGTGCAGCCTGGCAACGTGACCGTTCTGGCCGACACCGCAAT
3917447	-	38917.3	internal,	I:gene_id "EG10104"; gene_name "atpG";	CTGATTAAAGAGCTGCAGTTGGTATACAACAAAGCTCGTCAGGCCAGCATTACTCAGGAAC
3918132	-	28609	internal,	I:gene_id "EG10104"; gene_name "atpG";	CGCTTCCAAAATGCGTAAATCGCAGGATCGCATGGCGGCCAGCCGTCCTTATGCAGAAACC
3918283	-	98733.7	primary,	P:gene_id "EG10098"; gene_name "atpA";	GCAACCCAATCCTGGTAACGTCTGGCGGCTTGCCTTAGGGCAGGCCGCAAGGCATTGAGGA
3919682	-	37222.9	internal,	I:gene_id "EG10098"; gene_name "atpA";	CGGCCTGGCCGATTGTATGCAGGGTGAAATGATCTCCCTGCCGGGTAACCGTTACGCTATC
3919881	-	30331.8	internal,	I:gene_id "EG10105"; gene_name "atpH";	TGGTCATTGATGGCAGCGTACGCGGTCGTCTTGAGCGCCTTGCAGACGTCTTGCAGTCTTA
3920299	-	43210.1	internal,	I:gene_id "EG10105"; gene_name "atpH";	GCCGTCGAACACCAAAGTGTAGAACGCTGGCAGGACATGCTGGCGTTTGCCGCCGAGGTAA
3920702	-	52360.4	internal,	I:gene_id "EG10103"; gene_name "atpF";	CCGCAGAACGAGCACATAAGGACCTTGACCTTGCAAAGGCCAGCGCGACCGACCAGCTGAA
3921102	-	25756.6	internal,	I:gene_id "EG10102"; gene_name "atpE";	CCGCTGTGATGATGGGTCTGGCGGCAATCGGTGCTGCGATCGGTATCGGCATCCTCGGGGG
3921293	-	98761.9	internal,	I:gene_id "EG10099"; gene_name "atpB";	CTGAATGTGCCGTGGGCCATTTTCCACATCCTGATCATTACGCTGCAAGCCTTCATCTTCA
3922387	-	92464.2	internal,	I:gene_id "EG10106"; gene_name "atpI";	TCTGTGTCGCTCGTGAGTCGAAACGTTGCTCGGAAGCTTCTGCTCGTTCAGTTACTGGTGG
3923738	+	1403.95	antisense,	A:gene_id "EG10375"; gene_name "mnmG";	ACCTGTTCTTGATGCGTTGCCTGGTAAGCGGGTGCTTACCAGGCATTTTTAATGCGTTATG
3926314	-	23186.7	internal,	I:gene_id "EG11199"; gene_name "mioC";	TTACCACCGAAACGCTGCACGGTCCGCTGTTAGAAGATTTACCTGCCTCAGGGATCTGGCT
3927465	+	950.097	internal,	I:gene_id "EG10091"; gene_name "asnA";	CGCGGGCGAAGGGCTGTACACGCACATGAAAGCCCTTCGCCCCGATGAAGACCGTCTTTCT
3933399	+	4843.85	internal,	I:gene_id "EG10817"; gene_name "rbsD";	AAATGAAAAAAGGCACCGTTCTTAATTCTGATATTTCATCGGTGATCTCCCGTCTGGGACA
3933644	+	51339.8	internal,	I:gene_id "EG10817"; gene_name "rbsD";	GAAACGTTGCTCACTCACCTTGAGCAGCTGCAAAAACACCAGGGAAATACCATTGAAATTC
3935810	+	784.683	internal,	I:gene_id "EG10816"; gene_name "rbsC";	CCGATCTGTTTGGCTGGTTTGGTATTGGTCGTCCGCTGGGCGTACCGACGCCAGTCTGGAT
3937278	+	84576.4	orphan		TAATATAAAGAAAAGCAGGGCACGCGCCACCCTAACACGGTGGCGCATTTTATGGACATCC
3938325	+	865.27	internal,	I:gene_id "EG10819"; gene_name "rbsR";	ACAGTTTCTCACGTTATCAATAAAGATCGCTTCGTCAGTGAAGCGATTACCGCCAAAGTTG
3941692	+	214652	orphan		CTGAGAAAAAGCAAAGCGGCACTGCTCTTTAACAATTTATCAGACAATCTGTGTGGGCACT
3943461	+	1323.37	internal,	I:gene_id "EG30033"; gene_name "gltU";	GCGTCTTGCGAAGCAGACTGATACGTCCCCTTCGTCTAGAGGCCCAGGACACCGCCCTTTC
3947032	+	3113245	primary,	P:gene_id "EG30105"; gene_name "trpT";	ACCGGTCTCCAAAACCGGGTGTTGGGAGTTCGAGTCTCTCCGCCCCTGCCAGAAATCATCC
3948451	+	3537.43	primary, antisense,	P:gene_id "EG11450"; gene_name "yifE";,A:gene_id "EG11260"; gene_name "yifB";	GACTACACCGATTCTGACGATTAATAAAAAGGGCGAAATGCCCTTTTTTTATGTCAGTAGT
3950400	+	7583.88	internal,	I:gene_id "EG11270"; gene_name "ilvL";	TGGTCGTGATTAGCGTGGTGGTGATTATTATCCCACCGTGCGGGGCTGCACTTGGACGAGG
3957809	-	23751.4	internal,	I:gene_id "EG10503"; gene_name "ilvY";	ATTGCAATTTTTGCAACGTCAACATCGAGGGCTGTCCCTGTGGATTTACGCGATCTGAAAA
3959467	-	28044.2	antisense,	A:gene_id "EG10495"; gene_name "ilvC";	CCAGGAGAAGGCCTTGAGTGTTTTCTCCCTCTCCCTGTGGGAGAGGGTCGGGGTGAGGGCA
3959909	-	39482.1	orphan		TTTTCTCCCCTTGAGGGACCTGCGAAGCCCGGATTTTCCGGGCTTTTGCCATATATGTACC
3962698	-	25474.2	primary, antisense,	P:gene_id "EG10413"; gene_name "gpp";,A:gene_id "EG10837"; gene_name "rep";	TTAATGAGTAAGTGCCGGATGCGATGCTGACGCATCTTTTCCGGCCTTGATTATTTCCCTC
3965375	-	29767	internal,	I:gene_id "EG10844"; gene_name "rhlB";	ATTATCTTCTCTCTCATCCTGCGATTGCCGATCGCAAGGTGAATCAGCCGCGTGCCTTAAT
3965733	+	2421.93	orphan		ATAAAGTCAACCTTTAGTTGGTTAATGTTACACCAACAACGAAACCAACACGCCAGGCTTA
3966145	+	7762.01	orphan		ATTTCATGTTCGGGTGCCCCGTCGCTAAAAACTGGACGCCCGGCGTGAGTCATGCTAACTT
3966467	+	1340.32	internal,	I:gene_id "EG10845"; gene_name "rho";	ATGAATCTTACCGAATTAAAGAATACGCCGGTTTCTGAGCTGATCACTCTCGGCGAAAATA
3967721	+	797.399	primary,	P:gene_id "EG10845"; gene_name "rho";	TCATAAATTTGTCTTATGCCAAAAACGCCACGTGTTTACGTGGCGTTTTGCTTTTATATCT
3967945	+	793.158	internal,	I:gene_id "EG10840"; gene_name "rfe";	TTTTCTCTGAGAGCATGCATTGTGAATTTACTGACAGTGAGTACTGATCTCATCAGTATTT
3970120	+	1179.14	primary,	P:gene_id "EG11295"; gene_name "wzzE";	CGAAATAGCAACACTGCTGCGGTGAGCGCAAAGGCGCTCGCCGCTTATTCGAAGAGAATCG
3980881	+	2756.99	orphan		TACCCATAACGATAACCGGTAACACCGGAAAGCATGCAAACACAACACGAGGATTTATGGC
3982585	+	34159800	primary,	P:gene_id "EG30042"; gene_name "hisR";	CCTGGATTGTGATTCCAGTTGTCGTGGGTTCGAATCCCATTAGCCACCCCATTATTAGAAG
3982811	+	5189165	primary,	P:gene_id "EG30068"; gene_name "proM";	AACTGGTTTGGGACCAGTGGGTCGGAGGTTCGAATCCTCTCTCGCCGACCAATTTTGAACC
3986583	+	26874.5	internal,	I:gene_id "G0-8873"; gene_name "glmZ";	TTATGCCTCATCAGACACCATGGACACAACGTTGAGTGAAGCACCCACTTGTTGTCATACA
3986647	-	56963.9	primary, antisense,	P:gene_id "EG10434"; gene_name "hemY";,A:gene_id "G0-8873"; gene_name "glmZ";	CCGCCACAGTAGTTCCTTCTCACCCGGAGGCAAGCACCTCCGGGGCCTTCCTGATACATAA
3990701	-	51513.2	internal,	I:gene_id "EG10429"; gene_name "hemC";	TTAAGAATTGCCACACGCCAAAGCCCACTTGCACTCTGGCAGGCACACTATGTCAAAGACA
3991231	+	2756.99	internal,	I:gene_id "EG10170"; gene_name "cyaA";	AGAGACTGGATGCCATAAATCAATTGCGTGTGGATCGCGCGCTTGCTGCTATGGGGCCTGC
3991346	+	5878.77	internal,	I:gene_id "EG10170"; gene_name "cyaA";	AATGCCGGGTTACCTTGATGGTAACGTTCCCAAAGGCATTTGCCTTTACACGCCTGATGAA
3993701	-	29484.5	primary, antisense,	P:gene_id "EG11653"; gene_name "cyaY";,A:gene_id "EG10170"; gene_name "cyaA";	CAGTTTCCGCTAAGATTGCATGCCGGATAAGCCTCGCTTTCCGGCACGTTCATCACGAAAA
4000259	+	1094.32	antisense,	A:gene_id "EG11462"; gene_name "yigE";	GCAACGTCATGTAGGCCGGATAGGGCGTTTACGCCGCATCCGGCATCTGCGCCATCTTCAG
4001272	+	3147.21	internal,	I:gene_id "G0-10704"; gene_name " ";	ACACACCCAGTAGATACTGGCTCACTATCCTGTCATCCAGGATCAACTCCTAAGGCTATCC
4007800	+	861.032	internal,	I:gene_id "EG11468"; gene_name "rhtC";	CAAATGTATGTTGATGTTATTTCTCACCGTCGCCATGGTGCACATTGTGGCGCTTATGAGC
4009309	+	1022.21	internal,	I:gene_id "EG10739"; gene_name "pldB";	TGATGAAGCAGAGTTTACTGGTGTGGATGACATTCCGGTGCGCTTTGTCCGTTTTCGCGCA
4017235	+	4619.03	primary,	P:gene_id "EG11045"; gene_name "udp";	TGCTGTAATTCTCTTCTCCTGTCTGAAGGCCGACGCGTTCGGCCTTTTGTATTTTTGCGTA
4022287	+	2740.03	internal,	I:gene_id "G7808"; gene_name "tatB";	GCGAACTGCTATTGGTGTTCATCATCGGCCTCGTCGTTCTGGGGCCGCAACGACTGCCTGT
4023541	+	1493.02	primary,	P:gene_id "EG11479"; gene_name "tatC";	AAGCGAAAAAACTGAAGAATAAATTCAACCGCCCGTCAGGGCGGTTGTCATATGGAGTACA
4024941	-	28609	antisense,	A:gene_id "EG11396"; gene_name "ubiD";	CCATTGTAGCCTCTTAATCTGCGCCCATTATACGGCGTTCATCTTTGCGATGCTGTAAATT
4025081	+	1726.31	internal,	I:gene_id "EG11396"; gene_name "ubiD";	TGCTTGAACAGCAGGGTGAGCTAAAACGTATCACGCTCCCGGTGGATCCGCATCTGGAAAT
4037105	+	184978	primary,	P:gene_id "EG30084"; gene_name "rrsA";	GGTTGGATCACCTCCTTACCTTAAAGAAGCGTTCTTTGAAGTGCTCACACAGATTGTCTGA
4040636	+	2071765	primary,	P:gene_id "EG30070"; gene_name "rrfA";	CCGATGGTAGTGTGGGGTCTCCTCATGCGAGAGTAGGGAACTGCCAGGCATCAAATAAAAC
4042499	+	4771.73	internal,	I:gene_id "EG11831"; gene_name "rdoA";	ACCCGGATACCATCATGGACGCTCTGTTTGAGCATGGGATCCGGGTGGATTCCGGTCTTAC
4050007	+	92121.1	primary,	P:gene_id "EG30098"; gene_name "spf";	TTGGCTGAATATTTTAGCCGCCCCAGTCAGTAATGACTGGGGCGTTTTTTATTGGGCGAAA
4051237	+	2086.86	internal,	I:gene_id "G0-8874"; gene_name "csrC";	CAGGGTGTGTTGGCGGCCTGCAAGGATTGTAAGACCCGTTAAGGGTTATGAGTCAGGAAAA
4053422	-	120790	antisense,	A:gene_id "EG11836"; gene_name "hemN";	GCACATTGATGGCGCTTTCGTTTTCTACTTTGTAAACGAAGCGCCATTCACTATTTAAATC
4053570	-	27761.8	orphan		GAAAGTCGTAGGCCTGATAAGACGCGACCAGCGCCGCATCAGGCATCATGCTCAGATGCCT
4053618	+	856.794	antisense,	A:gene_id "G0-10657"; gene_name "yshB";	GAGCATGATGCCTGATGCGGCGCTGGTCGCGTCTTATCAGGCCTACGACTTTCTCCGCATC
4056428	-	232092	orphan		CAACGTGAAGTTTGTCAGCTATCTGTAGCCCATCTCTGCATGGGCTTTTTTCTCCGTCAAT
4058217	+	1336.08	internal,	I:gene_id "G0-10705"; gene_name " ";	CGCACCATCGTGCAAAAGGGCTGCACCACGATGTGAATGTTGCACCAATATAGTGCTTCAA
4058340	+	1645.71	orphan		AAGCGATCACAAAGGGACTCTGCAATACTTGTTTGCGGAGGATGTTTGTGATCCTGTTTTG
4080258	-	70971.9	primary,	P:gene_id "EG10284"; gene_name "fdhE";	AGGAGAGTAATCTCTGACGTTTTCCGGGTGGCGCAGGTCGCCCGGATTACAGCTCATAGGG
4081152	-	118221	internal,	I:gene_id "EG10284"; gene_name "fdhE";	TGAGCTGGGTTCAAGCGAGAAACGTACGGCGGATATGATTCCGCCGTTATTGTTCCCTCGG
4085776	-	95881.2	internal,	I:gene_id "EG11858"; gene_name "fdoG";	ATCCATGCAGGTCAGCAGAAGGCAGTTCTTTAAGATCTGCGCTGGCGGTATGGCAGGCACC
4101512	+	1794.17	orphan		GGCCGCATATCAGCTTAAAAAATGAACCATCGCCAACGGCGGTGGTTTTTTTGTGATCAAT
4105853	+	2345.57	internal,	I:gene_id "G7816"; gene_name "cpxP";	GATTTTGGGAGCAAATGATGCGCATAGTTACCGCTGCCGTCATGGCCTCAACGCTGGCAGT
4106007	+	2472.84	internal,	I:gene_id "G7816"; gene_name "cpxP";	CGACGGCATAAGTTTAACCGAACATCAGCGTCAGCAGATGCGAGATCTTATGCAACAGGCC
4106168	+	784.683	internal,	I:gene_id "G7816"; gene_name "cpxP";	AAAAAATGGCGAATGAGCAAATTGCTCGTCAGGTTGAGATGGCAAAAGTCCGCAACCAAAT
4106379	+	4525.8	orphan		GTTTTCCTTGCCATAGACACCATCCCTGTCTTCCCCCACATGCTGTGGGGGTTTTTTTTAT
4107349	+	1463.35	internal,	I:gene_id "EG11873"; gene_name "fieF";	ATCGGATGTAATTATCCATCAGGACCCCTGTTCCGTCGTACCCAGGGAGGGTAAACGGTCT
4108723	+	3524.72	orphan		ACAAAGCGCACTTTGTCAGCAATATGAGGCGGATTTCTTCCGCCTTTTTAATCCCTCAACA
4110703	-	367484	primary, antisense,	P:gene_id "EG11015"; gene_name "tpiA";,A:gene_id "EG10138"; gene_name "cdh";	CTAAACAGGCTTAAGTCTGACAGGTGCCGGATTTCATATCCGGCACTTACTTTCCTTAACT
4113600	-	50101.2	antisense,	A:gene_id "EG11877"; gene_name "uspD";	TCAAACGGTTGATAAATGAGTGATGATGACCACAGACAAGGAGGTCGCACTGCTCTTTTTG
4114522	-	86730.9	primary,	P:gene_id "EG11517"; gene_name "glpX";	CTGATTGATTTGATCGATTGAGCCTTCCAGTCCTTCGGGACTGGAATTTTTTTGTTCGGAG
4115641	-	548119	orphan		TATGCCGCATCCGGTAGTCCCGAAACGTGCGGGGGCAACCCCGCACACATCAATAATCCCT
4117077	-	50383.6	internal,	I:gene_id "EG10398"; gene_name "glpK";	GCAGCGCGAATTTGAGCAAATCTACCCAAAACCAGGTTGGGTAGAACACGACCCAATGGAA
4117911	+	1811.13	antisense,	A:gene_id "EG10396"; gene_name "glpF";	AGCCACAATGCAATGGTAACAGCGGGATTAAGATGCGCGCCGGAAACCCCTGCGGTCAGGT
4117912	-	24033.8	internal,	I:gene_id "EG10396"; gene_name "glpF";	AATCAGTGTCATTTGGGGACTGGGGGTGGCAATGGCCATCTACCTGACCGCAGGGGTTTCC
4118117	-	265644	orphan		TACAGCATGCCTACAAGCATCGTGGAGGTCCGTGACTTTCACGCATACAACAAACATTAAC
4118519	+	861.032	internal,	I:gene_id "EG11878"; gene_name "zapB";	GGGACGAGGATTTTTATCCATCAACGCCTTGCAATTCAGGAGAGGTATGACAATGTCATTA
4118843	+	56119.7	antisense,	A:gene_id "EG11879"; gene_name "rraA";	GTGTAGGCCAACAGGTAACGCAGAAAAAAGGCACCTTGCGGTGCCTTTCTTATCATTCAAT
4119066	+	2006.27	antisense,	A:gene_id "EG11879"; gene_name "rraA";	CAACTCTTCCAGGTCATCTACCTGACGCACCGCGCCGTAAATGACCAGACCTTCCCATTCA
4119080	-	23751.4	internal,	I:gene_id "EG11879"; gene_name "rraA";	TTCTGTTCGTCGCGCACTGGTCGATGCTGAACTGGCGCGTCTGGCAGTACAAAATGAATGG
4120362	-	28609	orphan		CGTTCAATCATTTTCATCATTGTTTGATGGGGCTGAAAGGCCCCATTTTTATTGGCGCGTA
4126996	+	3444.13	orphan		TTTAACATCGCGTGGTGTCTGGCGTTAGGGCTGGAAGAGCGACGCGGCCTTAAACCGAGGT
4127267	+	5781.16	primary, antisense,	P:gene_id "EG10889"; gene_name "rpmE";,A:gene_id "EG11882"; gene_name "yiiX";	AGCAAATAAGACCGGATTTCCGAAAAAAGCGCCGCACGGCGCTTTTTTTGTGCCTGAATTT
4127909	-	26039	orphan		CATCCGGCATAAACAACGAGCACGTTGTCTGCGACCCACCGCTTTTTATACATGGACGTTT
4128471	-	60098.8	orphan		GCCGACAGGTGCATTACACGATGTCACGGTAACGCCTGTACGGTAAACTATGCGGGTTTAC
4153127	-	26632.2	orphan		AAAGCCCGAGCATATTCGCGCCAATGCGACGTGAAGGATACAGGGCTATCAAACGATAAGA
4158279	-	63515.9	primary,	P:gene_id "EG31116"; gene_name "oxyS";	ATAACTAAAGCCAACGTGAACTTTTGCGGATCTCCAGGATCCGCTTTTTTTTGCCATAAAA
4159345	-	78427.8	primary, antisense,	P:gene_id "EG11428"; gene_name "sthA";,A:gene_id "EG10681"; gene_name "oxyR";	TTTTAAAACTTTATCGAAATGGCCATCCATTCTTGCGCGGATGGCCTCTGCCAGCTGCTCA
4161634	+	3524.72	internal,	I:gene_id "EG11394"; gene_name "fabR";	CCGAAGCAATGGTGACAATTGTCTTCAGTGCGGGTGCCGAGGCGTTGGACGTCGGCGTCGA
4162267	+	3083.57	antisense,	A:gene_id "EG11022"; gene_name "trmA";	GGAACTGATCAAACAGAGCCAGACGTTCGACCTTGTGCGTCTGGCTTAATGTTTCCAGATT
4162434	+	1259.73	antisense,	A:gene_id "EG11022"; gene_name "trmA";	ATGGTTTCGCACTGATAACTCTTTAAGTCGATCCCTTGCAGGCGGTTAAACTCGCGCACAC
4163564	+	2269.22	orphan		TCTCTTAGTATCTTAGATACCCCTCCAAGCCCGAAGACCTGCCGGCCAACGTCGCATCTGG
4163679	+	1013.73	internal,	I:gene_id "EG10126"; gene_name "btuB";	ATGCTTTACAATGATTAAAAAAGCTTCGCTGCTGACGGCGTGTTCCGTCACGGCATTTTCC
4168233	+	210952	primary,	P:gene_id "EG30085"; gene_name "rrsB";	GGTTGGATCACCTCCTTACCTTAAAGAAGCGTACTTTGTAGTGCTCACACAGATTGTCTGA
4168348	+	1789.94	orphan		GGCCGTTCGCTTTCTATTAATGAAAGCTCACCCTACACGAAAATATCACGCAACGCGTGAT
4168633	+	33520.8	orphan		AGTCTCTCAAATTTTCGCAACACGATGATGAATCGAAAGAAACATCTTCGGGTTGTGAGGT
4171800	+	2964.84	primary,	P:gene_id "EG30071"; gene_name "rrfB";	CAGGCATCAAATAAAACGAAAGGCTCAGTCGAAAGACTGGGCCTTTCGTTTTATCTGTTGT
4172639	+	1272.44	internal,	I:gene_id "EG11205"; gene_name "murB";	TGCGTCTGCCAAAAGAGTGGCAACCTGTACTAACGTATGGTGACTTAACTCGTCTGGATCC
4174046	-	78710.2	primary, antisense,	P:gene_id "EG10922"; gene_name "coaA";,A:gene_id "EG10123"; gene_name "birA";	GAGGTCAGACTACGCAAATAATTTGCAGGGGAGCGAATACTCCCCTTTCTTATTTTTCTGC
4175463	+	42938050	primary,	P:gene_id "EG30102"; gene_name "thrU";	AACTGACTTGTAATCAGTAGGTCACCAGTTCGATTCCGGTAGTCGGCACCATCAAGTCCGG
4175747	+	28949500	primary,	P:gene_id "EG30036"; gene_name "glyT";	CCTCAGCCTTCCAAGCTGATGATGCGGGTTCGATTCCCGCTGCCCGCTCCAAGATGTGCTG
4176021	+	3766.48	internal,	I:gene_id "EG11037"; gene_name "tufB";	AAACCGCACGTTAACGTCGGTACTATCGGCCACGTTGACCATGGTAAAACAACGCTGACCG
4177187	+	9148.92	orphan		AACATTTGACGCAATGCGCACTAAAAGGGCATCATTTGATGCCCTTTTTGCACGCTTTCGT
4178362	+	2901.21	orphan		TTTAATCGTTGCACAAGGCGTGAGATTGGAATACAATTTCGCGCCTTTTGTTTTTATGGGC
4179776	+	11511.6	orphan		GCGAATGAAGGAAGCCAACGCCGTCACAAGCTGAATAGCGACGGATAGAAAAGATTTGTTC
4180221	+	1234.3	internal,	I:gene_id "EG10871"; gene_name "rplJ";	TGCTGCGCCGTGCTGTTGAAGGTACTCCGTTCGAGTGCCTGAAAGACGCGTTTGTTGGTCC
4180511	+	1230.06	primary,	P:gene_id "EG10871"; gene_name "rplJ";	GCTGCTGTACGCGATGCGAAAGAAGCTGCTTAATCGCAGTTATCTTTTTAACGCATTCGCT
4180887	+	865.27	internal,	I:gene_id "EG10873"; gene_name "rplL";	CTGCTCTGAAAGAAGGCGTGAGCAAAGACGACGCAGAAGCACTGAAAAAAGCTCTGGAAGA
4180995	+	61408.7	orphan		GCCTGAGAAATCAGGCTGATGGCTGGTGACTTTTTAGTCACCAGCCTTTTTGCGCTGTAAG
4183172	+	1034.92	internal,	I:gene_id "EG10894"; gene_name "rpoB";	AGGCCACTTCGTAGAAGACCTGGTAACTTGCCGTAGCAAAGGCGAATCCAGCTTGTTCAGC
4190323	-	533884	primary, antisense,	P:gene_id "G0-9388"; gene_name "sroH";,A:gene_id "EG11429"; gene_name "yjaZ";	AATACCAGAGATAATTCTCTGGCGAAACCCACCTTAAGGTGGGTTTTGTTATTTTGAGGGC
4190584	-	130816	orphan		AGGAATGTTGTCCAGGGCGAAAAGCTTCTTCCTCGTTTCGCCCTGCCTTTCTTAAAAATTC
4196186	-	1783560	orphan		GGATCCGCGGAACCTGATCAGGCTAATACCTGCGAAGGGAACAAGAGTTAATCTGCTATCG
4196488	-	25756.6	internal,	I:gene_id "EG11738"; gene_name "rsd";	AAGATTTGGCCGCAACTCGAAGCCAATACTCAACAGATTATGGATTACTACGATTCCAGTC
4200389	+	788.921	internal,	I:gene_id "EG10466"; gene_name "hupA";	AGGCTAAAGCTGCTCTGGAGTCCACTCTGGCTGCAATTACTGAGTCTCTGAAAGAAGGCGA
4200605	+	102752	internal,	I:gene_id "EG11917"; gene_name "yjaH";	ATTGCGTGGCAGTGAACAGTTTTAACGAAGGGGTGGTTTCACCCCTTTTGTCTTTCTGGCG
4208031	+	83007.4	orphan		GTGCGCTAAAGCGCGTCGCAACTGCTCTTTAACAATTTATCAGACAATCTGTGTGGGCACT
4210035	+	164808	orphan		AGTCTCTCAAATTTTCGCAACACGATGATGAATCGTAAGAAACATCTTCGGGTTGTGAGGT
4218963	+	4962.57	internal,	I:gene_id "EG10026"; gene_name "aceK";	GTACTGTCGGTTATTTGACCACCGCTCGCTTACTCCCGAGCGGCTTTTTATCTTTAGCTCT
4223556	-	51795.6	internal,	I:gene_id "EG10491"; gene_name "iclR";	AACGCGGCAGAAAACCCGCCGTTGCCACCGCACCAGCGACTGGACAGGTTCAGTCTTTAAC
4231270	-	42362.8	antisense,	A:gene_id "EG11921"; gene_name "rluF";	AACACAATTTTCCCCTCACCCTAACCCTTTTCCCGAAGGGGCGAGGGGACTGTCCGGGCAC
4233400	-	36347.3	orphan		TGCATCGCCGAGGTGATTGAACGGCTGGCCACGTTCATCATCGGCTACAGGGGCTGAATCC
4242532	-	22904.2	orphan		CGTTATCCCAACTTGTGACTGTTATTCGGCGCTCCACGGAGCGCCTTTTTTTCTTTCGTCT
4245094	-	34059.8	orphan		GTCGCATCAGGCAGTTGTTGTCGGATAAGGCGTGAAAGCCTTATCCGTCCTGGAATGAGGA
4249491	+	1183.38	orphan		CCGGCATAAAAACAGGTTGTCATTATCTGAAAGGGGCGAAAGCCCCTCTGATTATCGGGTT
4250532	+	7185.11	orphan		CCACAGTGCTGATTTTGCAACAACTGGTGCGTCTCCTGGCGCACCTTTTTTTATGCTTCCT
4253924	+	1009.49	primary,	P:gene_id "EG11370"; gene_name "ubiA";	TACTGGCATTTCTGATGATGTAAAAAAGCCGGATGATCATCCGGCTTTCTTCTGGGTTGCC
4256805	-	88707.8	antisense,	A:gene_id "EG10224"; gene_name "dgkA";	ATTGAGGATTTCCACAATCATCACCAGCATCACGGAGCTGATAAGCAGCACGCGGGTAATC
4257185	+	2273.46	internal,	I:gene_id "EG10533"; gene_name "lexA";	GCAACAAGAGGTGTTTGATCTCATCCGTGATCACATCAGCCAGACAGGTATGCCGCCGACG
4259483	+	1866.29	primary, antisense,	P:gene_id "EG11928"; gene_name "yjbJ";,A:gene_id "EG11929"; gene_name "zur";	AATATCGCTGGTAATTAATCCCTCCTGCCCGACGTGTACAAGGATGTACGCCCTCTTAACG
4259941	-	82438.1	internal,	I:gene_id "EG11929"; gene_name "zur";	ACAACGCAGGAGTTATTAGCGCAGGCTGAAAAAATCTGCGCGCAGCGTAATGTGCGCCTGA
4263246	+	8033.43	antisense,	A:gene_id "EG11492"; gene_name "qor";	TACAGCCGAACTATAAAAAGAAAGGGCTTCCCAGGTGGAAGCCCTATTTCTTTTATGGAAT
4270159	+	4288.21	primary,	P:gene_id "EG11934"; gene_name "aphA";	CGTCAATTCAGAATACTGACAGAGCGGGAGAGCGTGATGCTCTCCCGAATGCTGTTTTTTT
4270279	+	1416.66	internal,	I:gene_id "EG11935"; gene_name "yjbQ";	GAGCAGCACATGTGGTATCAAAAGACGCTCACGCTTAGCGCCAAATCTCGTGGGTTTCATC
4274758	+	2451.59	antisense,	A:gene_id "EG11937"; gene_name "yjcB";	AAGCATCTGCCAGCCATAAAAAAGAAGCCTCCGTTATGGAGGCTTCTACGTATCAGGTCAA
4330351	+	844.082	orphan		ACACTGGTAGGGTAAAAAGGTCATTAACTGCCCAATTCAGGCGTCAACTGGTTTGATTGTA
4341567	-	26321.4	internal,	I:gene_id "EG11230"; gene_name "melR";	TACGTTTATGTGCAGCAGCGACGAAAAACAGACCCGCAGCCCGCTGTCGCTGTATTCGGAA
4350442	-	22904.2	internal,	I:gene_id "G7827"; gene_name "dcuS";	AAGATCAAATCTCCGGTTATCGCTGGTTTTTTAATCAGCAAGATTAACCGCGCGACCGATT
4351571	-	34624.6	internal,	I:gene_id "G7827"; gene_name "dcuS";	GATGAAATTGAGTACCACAGTGATCTTAATGGTCAGTGCGGTACTGTTCTCGGTGCTATTG
4362549	-	2196090	primary,	P:gene_id "EG30064"; gene_name "pheU";	GGGATTGAAAATCCCCGTGTCCTTGGTTCGATTCCGAGTCCGGGCACCAAATTCATATAAA
4365438	-	35217.8	primary,	P:gene_id "EG11225"; gene_name "dcuA";	GTAGCTTCATGCTGTAATGATCAATCGCGGGGCGTTCACGCCCCGCTTTCTTTCCCGCCGA
4367011	-	99269.9	internal,	I:gene_id "EG10095"; gene_name "aspA";	AACGGTGACATCGTGGGTAAAATCTGTGCCGAAACCGGTAAGAGTGTACGTGAAGTCGTTC
4367385	-	46655.7	internal,	I:gene_id "EG10095"; gene_name "aspA";	TGCGCTTGCTCTCTTCAGGCCCACGTGCCGGCCTGAACGAGATCAACCTGCCGGAACTGCA
4367987	-	44650.4	internal,	I:gene_id "EG10095"; gene_name "aspA";	CTACCAGGGCGGCGCAGGTACTTCCGTAAACATGAACACCAACGAAGTGCTGGCCAATATC
4368259	-	81280.1	internal,	I:gene_id "EG10095"; gene_name "aspA";	ATCGAAGAAGATCTGTTGGGTACCAGGGAAGTTCCAGCTGATGCCTACTATGGTGTTCACA
4368394	-	244434	orphan		TATGATCTCGGGTATTCGGTCGATGCAGGGGATAATCGTCGGTCGAAAAACATTCGAAACC
4373350	+	1471.83	antisense,	A:gene_id "G7835"; gene_name "yjeJ";	CCAACGATCACGTTATCAGTCATTTCAGGCTGGATGGCTCCAGCCTCGCATTAGCAAAGAT
4376301	+	42716.6	primary,	P:gene_id "EG12099"; gene_name "efp";	TCTCGCGTGAAGTAATGCGGTTGTGGTGCGGCCTGCAGGCTGCACCATCACTTATTCAGGT
4376736	+	3796.21	primary,	P:gene_id "G0-9562"; gene_name "ecnB";	AAGCGCAGCAATAAGCAATAACGGTACGACAGCTGTGTCGTGCCGTTTGTTTTTTCTGCGA
4376876	+	1662.66	internal,	I:gene_id "EG11616"; gene_name "sugE";	GCAAACGCCTCTTTTCACCGGGGACGGCCCCAATTCTCCGGAGCCTGATATGTCCTGGATT
4378962	-	75292.9	primary,	P:gene_id "EG10333"; gene_name "frdD";	ATCTAACGCATCGCCAATGTAAATCCGGCCCGCCTATGGCGGGCCGTTTTGTATGGAAACC
4382346	-	50355.2	orphan		AGCGTTCGCAGACCGTAACTTTCAGGTACTTACCCTGAAGTACGTGGCTGTGGGATAAAAA
4392617	+	10358	internal,	I:gene_id "EG30041"; gene_name "glyY";	GGCACAGACCACCCAAGCGGGAATAGCTCAGTTGGTAGAGCACGACCTTGCCAAGGTCGGG
4397182	+	5989.09	internal,	I:gene_id "EG11363"; gene_name "amiB";	CGAAATACATAAACGTCGACCAGAACACGCCAGCCTTGGCGTTCTGCGCTCGCCGGATATC
4399171	+	1017.97	internal,	I:gene_id "EG11281"; gene_name "mutL";	GCAGTGGTCAATGGCACAGGCCATAACCCTGCTGGCGGACGTGGAACGGTTATGTCCGCAA
4399888	+	937.381	internal,	I:gene_id "EG10595"; gene_name "miaA";	AGGTGCATCAGTTCGCCATCGCCCCGGCGAGCCGTGAACTGCTCCATCAACGCATTGAGCA
4400328	+	1102.8	internal,	I:gene_id "EG10438"; gene_name "hfq";	AAAAGAGAGAATGGCTAAGGGGCAATCTTTACAAGATCCGTTCCTGAACGCACTGCGTCGG
4400650	+	21835.5	orphan		TTCGGGCTGTTTTTTTACACGGGGAGCCAGCGATCCTGCGTTCCCCGCTGATCTATTTAGA
4404366	+	873.748	orphan		CGGTACAGGTCAATAAAGCCACCGCATCCTCAGGGATGTCGGTGGTTTTCTTTTTCTATAA
4404698	+	1102.8	internal,	I:gene_id "EG10790"; gene_name "purA";	TGGTAGAATCCATTTTTAAGCAAACGGTGATTTTGAAAAATGGGTAACAACGTCGTCGTAC
4406080	+	1179.14	orphan		TGATACATTGCTGTGTCGGGTAAGCCATTACGCTATCCGACACAGTGTTAAATCCTCGCTT
4416378	-	193740	orphan		ACATAGTCAGCTTTACATTGCTTTGCGTCCCTATGCGTTTACCTGTGCACAATAAATTACC
4416702	-	89837.6	internal,	I:gene_id "G7852"; gene_name "bsmA";	AATAGCGTTATTTACCGGTTTGCCAGTTTATTATTGGTGTTGATGTTAAGTGCCTGTAGCG
4425120	+	57714.1	internal,	I:gene_id "EG10905"; gene_name "rpsF";	TTCGGCTGACCCAGACAGGAGGCTGAATAATCCGTAAGGAGCAATTCGATGCGTCATTACG
4425548	+	1493.02	primary, internal,	P:gene_id "EG10905"; gene_name "rpsF";,I:gene_id "EG10764"; gene_name "priB";	GGATTCTGAAGAGTAATTTCTGATGACCAACCGTCTGGTGTTGTCCGGCACCGTGTGCAGG
4426606	+	6756.69	primary, antisense,	P:gene_id "EG10870"; gene_name "rplI";,A:gene_id "G7862"; gene_name "yjfZ";	AATTCGTTATTCAACGAGACGTAAAAACGCCGACCATTGGTCGGCGTTTTGCTTTCTATTT
4428652	-	32337	internal,	I:gene_id "G7864"; gene_name "ytfB";	GAACTAAAACCAACCCTGGAGAAAGTCTGGCACGCGCCGGACAATTTTCGCTTCATGGACC
4429596	+	3070.86	primary,	P:gene_id "G7865"; gene_name "fklB";	AATCCTCTAAGCAGCGCATTCTGTTCCCCTCGAACGAGAGGGGAGCAGGCATTCAGCAATA
4429862	+	3020	orphan		ACTAAAGGCCGTAGAGCCTGAACAACACAGACAGGTACAGGAAGAAAAAAACATGGTAGAT
4437540	+	1009.49	primary,	P:gene_id "EG10043"; gene_name "cysQ";	TACTAAATTCAGATGGCAGAAACAGTGTATTTCCTGATTCTGCCATCCTGATTTCTCCCAA
4439860	+	21988.2	antisense,	A:gene_id "G7873"; gene_name "ytfL";	TAAAAAGTGCTATGCAGTAATAAGACGGCTCCTGATTCAGGAGCCGTTGATGTTTCTGGGG
4447871	+	2718.84	internal,	I:gene_id "G7875"; gene_name "tamB";	CTAAGCTATATCTGGAAGCCGTGTCTGGTGTAGACCAGGCACTGGATTTGCTCTATCAGTT
4448270	+	1259.73	primary, antisense,	P:gene_id "G7876"; gene_name "ytfP";,A:gene_id "EG11213"; gene_name "yzfA";	AGACAGGGATAAGTAACCATATGCATACGCCACCTTCGGGTGGCGTTGTTTTTTGCGAGAC
4449068	-	237316	antisense,	A:gene_id "EG12096"; gene_name "chpB";	CTTCTGGCGTAATAACCCTGAACGCCGGGCTTCGGTTAGTAAGGGTTTTTTTATGCCCGCG
4457270	+	784.683	antisense,	A:gene_id "EG11410"; gene_name "yjgA";	TTTGAGCATAGTGCCTGATGCGACGCTTGATGCGTCTTATCAGGCCTACAGGTGCACCGTA
4463010	-	64109.2	primary,	P:gene_id "EG11402"; gene_name "treC";	GAAGTAAATCTTCCCTAAGCCCCGGTAATGCCGGTCATTCCGGGGTTTTGTCTGTCAGTAT
4464728	-	425606	primary,	P:gene_id "EG12127"; gene_name "treB";	GCACGCTGGACATTGTTTAATTTTCTTCGGGGCGCAATTGCGCCCCCTCGCATTCGCAGGA
4465154	-	40357.7	internal,	I:gene_id "EG12127"; gene_name "treB";	TTGCTATTGATTTGCAGATGATTCAAAGCATGGGTGGTACGCCAGTGTGGCCGCTGATTGC
4465462	-	25756.6	internal,	I:gene_id "EG12127"; gene_name "treB";	CGCCAAAGTAGGCTATCAGGCGCAGGTGATCCCGGCACTGTTAGCCGGACTGGCGCTGGGC
4465875	-	23751.4	internal,	I:gene_id "EG12127"; gene_name "treB";	GCGCAGGTTGATAAAGAGCAGGTAAAAAAAGCCGCCCGGCATAATATGAAATGGCATGAGC
4465998	-	48660.8	internal,	I:gene_id "EG12127"; gene_name "treB";	CCGAAAGAAATTGAGCAACTCCCTATGGTGAAAGGCTGTTTCACCAATGCCGGGCAATTTC
4466176	-	47785.2	internal,	I:gene_id "EG12127"; gene_name "treB";	AATATATTCTGCAGCCAACCAAAAATGTCATCTGCCATGGGGCTTTATGATGAGCAAAATA
4467576	+	7303.91	orphan		CGTTTTAACGTCCCTGCTCAGCTTTATTACCTTCAGGTAAGGCTTCGCCACGCCTGAAGAC
4470376	-	107037	orphan		TTTATTGAATTTGTTGGCCGGATAAGGCATTTACGCCGCATCCGGCATGAACAAAACTCAC
4470491	-	188006	primary,	P:gene_id "G7877"; gene_name "ridA";	GCTGTTCGTCGCTAATCTTGATGGAAATCCGGGCTATCATGCCCGGATTAAGTCTGATGAC
4478555	+	1331.85	internal,	I:gene_id "G7885"; gene_name "rraB";	TGAAGAAACACGTTTGATTATTGAAGAATTACTGGAAGATGGCAGCGATCCGGACGCGCTG
4486156	+	8648.46	orphan		TGAGTATAATTATCTTAGCGACGATTTCGACGACTCAAGAGAATAAATGACGTTTAAGCCA
4496489	+	76203600	primary,	P:gene_id "EG30053"; gene_name "leuX";	CAAAATCAACCGTAGAAATACGTGCCGGTTCGAGTCCGGCCTTCGGCACCAAAAGTATGTA
4497144	-	25474.2	antisense,	A:gene_id "EG12364"; gene_name "intB";	AGCGCATGATGGCTGTAGTGCGCTGCTGAAGACGAGCGGCCACTTCAAGACGTCCAGACAT
4500237	-	28637.4	orphan		ACAGCACATGGTGGATATCCAATCAAGGAAAACTGGGGGAGCATGACACACGCATCTCTGT
4500428	-	85572.9	orphan		TTATATGTCAGTGTATGACTATCCCGTACCAACCACACCGTGGCTGAATACGGCACCCGGT
4501955	+	2260.75	orphan		ACGCAACTGGCTGATGCAAGCAGTCTAATGTCTTTAGATCCGCTGGCCTGCGGGCATGACA
4502127	+	1009.49	antisense,	A:gene_id "G7900"; gene_name "insG";	CATCTTGGTTCTGTAATGCCAGTCAGTTAAGCAACTGACTGGCTCTTTTTCGGGGCTGTGG
4513353	-	80997.8	internal,	I:gene_id "EG10288"; gene_name "fecC";	GCGATAAAACACCCGGTGCTGCTGTGGGGGCTTCCCGTTGCAGCACTTATTATTATTTTCT
4514320	-	46627.2	primary,	P:gene_id "EG10286"; gene_name "fecA";	GGGTCGTTGAAGTTCTGATGTGTTAACGCCCGGCTTGCCGGGCTTTTAGCTGGAATGTGAT
4518224	-	29202.2	internal,	I:gene_id "EG10291"; gene_name "fecI";	AATATGACTACGTGATAATTAACTTTTGATGCACTCCGCATGTCTGACCGCGCCACTACCA
4518479	+	1637.24	orphan		TGCTATTATTGACATCCTCACTGCCCTAAAGGATGGGGATTTCGGTAATGCTGCCAACTTA
4520003	-	23469	internal,	I:gene_id "G7909"; gene_name "yjhU";	AACATGCCGGAAAACGTGATGATACAAAGCTGATGCGGACTCGCCTTTCACGTGCCGGTGG
4528112	+	301585	primary, antisense,	P:gene_id "G0-10609"; gene_name "ryjB";,A:gene_id "G7915"; gene_name "sgcQ";	GAAGGGTTATTGCTCTTTGCCGGGGATAAGCGCTCTGCTTATCCCCATCTTATCGGCGTAT
4534045	-	115905	internal,	I:gene_id "G0-10473"; gene_name "topAI";	GTTTGCACGTTTTGCACATGATGATTAAATAGGTTCTTCAGTATGAATTTATCCCGTCAGG
4540846	+	2201.35	orphan		TTAACAGTTGCTACTCCATTTAAGTTCACTCAGAAGAACTGGTCCACTTACGTTAGTTATT
4541591	+	3032.72	primary,	P:gene_id "EG10309"; gene_name "fimB";	GCGTCACGCTGTTTTATAGAGATAGTTGAGATACCAGGGATGGTGTTAAAAACTACATTAT
4543708	+	8788.45	primary,	P:gene_id "EG10308"; gene_name "fimA";	CAATAACCTACCCAGGTTCAGGGACGTCATTACGGGCAGGGATGCCCACCCTTGTGCGATA
4572314	+	950.097	orphan		TCATTTTTATCTAAAATTGATTTATAGTATCGACCTGAAAAAATAGTTGTTGCCGCCTGAG
4579912	+	129634	primary,	P:gene_id "G0-10610"; gene_name "symR";	GTGATTGTGATTAGCGATGCGGGTGTGTTGGCGCACATCCGCACCGCGCTAAATACCTGTA
4587866	-	31772.2	primary, antisense,	P:gene_id "EG10021"; gene_name "yjiA";,A:gene_id "EG10612"; gene_name "mrr";	GGAAGTAAGGGGTTATGGGCCGGATAAGGCGCAGCCGCATCCGGCCTGATATTTCACTCAA
4589097	-	59788	primary,	P:gene_id "G7942"; gene_name "yjiY";	GATCTCTTCGCACCACTAACCGTGTTTAGCCCCGCTTCGGCGGGGCTTTGTTCTTATCAGA
4590246	-	24344.6	internal,	I:gene_id "G7942"; gene_name "yjiY";	CCCGTTCCTGTTCATCACCATCGCCTGTGGTGCGGTATCTGGCTTCCACGCGCTGATCTCT
4590791	-	35782.5	internal,	I:gene_id "G7942"; gene_name "yjiY";	GCATCTCTTGGTGAGATGATCAAAGAAGAGATGGGACCAGTACCGGGGACTATCGCGCTGT
4591157	-	33466.6	internal,	I:gene_id "G7942"; gene_name "yjiY";	GTAGTTGCATTACGTCGGGGGGAGCACATCAGCGCCCTGTGGATCGTGGTCGCCTCTGTAT
4606076	-	1998930	primary, antisense,	P:gene_id "EG30051"; gene_name "leuV";,A:gene_id "G0-10474"; gene_name "yjjZ";	GTTAGTGTCCTTACGGACGTGGGGGTTCAAGTCCCCCCCCTCGCACCAATTATCTTTACTT
4606193	+	1085.84	antisense,	A:gene_id "EG30051"; gene_name "leuV";, gene_id "EG30047"; gene_name "leuP";	TCTACCAATTCCGCCACCTTCGCACAGTCATCTTACTTTTTTTGATATCGCCTCGTTTGGT
4606200	-	475823000	primary,	P:gene_id "EG30047"; gene_name "leuP";	GGTGTTAGTGTTCTTACGGACGTGGGGGTTCAAGTCCCCCCCCTCGCACCAAACGAGGCGA
4606792	+	1344.56	antisense,	A:gene_id "G7950"; gene_name "rsmC";	TGGAAGCCAAATGTCTCATCCAGCACGTCCGGATAAGGCAGGAAGGCGTTCGCTACAATTC
4621665	+	869.508	orphan		GCAAGGCGATTGCCTTGTGAAGCCGGAGCGGGAGACTGCTCCGGCTTTTTAGTATCTATTC
4635102	-	80404.8	internal,	I:gene_id "EG11366"; gene_name "rob";	TATTCGTGCTCGTCGTTTGTCGAAATCGGCGGTCGCACTACGCCTGACTGCGCGTCCGATT
4640124	-	23469	internal,	I:gene_id "EG10061"; gene_name "arcA";	GAATATGACATCAACCTGGTGATCATGGATATCAATCTGCCGGGTAAGAACGGTCTTCTGT
4640397	-	50666	antisense,	A:gene_id "G7954"; gene_name "yjjY";	CGTTGATGGAAAGTGCATCAAGAACGCAATTACGTACTTTAGTCATGTTACGCCGATCATG

## Sheet: LB 2.0
Supplementary file 1. 3´ ends identified by Term-seq
3´ end position	strand	Term-seq AVG read count	classification	details	3′ end region
267	+	4108.37	primary,	P:gene_id "EG11277"; gene_name "thrL";	ACCACCATCACCATTACCACAGGTAACGGTGCGGGCTGACGCGTACAGGAAACACAGAAAA
9230	+	5585.59	primary,	P:gene_id "EG11556"; gene_name "talB";	GATCTGCTGTAATCATTCTTAGCGTGACCGGGAAGTCGGTCACGCTACCTCTTCTGAAGCC
10394	-	40653.7	internal,	I:gene_id "EG11512"; gene_name "satP";	CGGCATGACCACCATTCTGCTTAACCTGCACAACGTGGGTTATTTCGCTCTGGACGGTATT
17007	+	36222.8	primary, antisense,	P:gene_id "G0-9581"; gene_name "sokC";,A:gene_id "EG10373"; gene_name "mokC";	GCATATAGGAGGCCTCGGGTTGATGGTAAAATATCACTCGGGGCTTTTCTCTATCTGCCGT
17504	+	3078.49	internal,	I:gene_id "EG10652"; gene_name "nhaA";	AAAAACGATCTATTCACCTGAAAGAGAAATAAAAAGTGAAACATCTGCATCGATTCTTTAG
20763	-	80927	orphan		CGCCAATTTGCTGAAGCTTTGTGAAAAAGCCCGCGCAAGCGGGTTTTTTTATGCCTGCTGC
57148	-	79405.9	orphan		TTAACACTAGCGTAGAGATGACGAGTACGTTAGTCTCTGACCGTTTGTCACGCGCAACGTT
57344	+	3015.8	orphan		GGAAAACGGTAAAAGCACCTTTATATTGTGGGAGATAGCCCTGATATCCGTGTGTCGATTT
63352	-	100270	orphan		ATTTTGATGCGTGACGAATGCTTTGCCATCCAGTACCATAGCGCCCTTTCCATTCCTGGAC
75517	-	668280	internal,	I:gene_id "G0-9381"; gene_name "sroA";	TACCCGTCGAACCTGATCCGGATAACGCCGGCGAAGGGATTTGAGGCTCCTTCTCAAGTCC
77593	+	3281.97	primary,	P:gene_id "G0-9941"; gene_name "sgrS";	AGTATTGGTGTAAAATCACCCGCCAGCAGATTATACCTGCTGGTTTTTTTTATTCTCGCCG
83641	-	65832.7	internal,	I:gene_id "EG11280"; gene_name "leuL";	CTTTATCGGTCTACTACTACTAAACGCATCTTCTTTGCGCGGTAGACGAGTGAGCGGCATC
92658	+	91095	internal,	I:gene_id "EG10341"; gene_name "ftsI";	GCTTATATCCTCAAAAACAACGGTGGTCTGACATAGAGAGGGCCACCTTCTCTTTCGGCTA
106673	+	1776.86	internal,	I:gene_id "EG10265"; gene_name "lpxC";	AAAGTCACCCTGACGTTACGCCCTGCGCCGGCCAACACCGGGGTCATCTATCGTCGCACCG
106822	+	1307.21	internal,	I:gene_id "EG10265"; gene_name "lpxC";	ACGGATTTCAACCGTAGAGCACCTCAATGCTGCTCTCGCGGGCTTGGGCATCGATAACATT
107811	+	1403.37	internal,	I:gene_id "EG11087"; gene_name "secM";	TCTCTTATTAGGGATGGTTGCGGCGAGTTTAGGTTTGCCTGCGCTCAGCAACGCCGCCGAA
118764	+	1861.87	internal,	I:gene_id "EG10041"; gene_name "ampD";	ACATATAAGGAGATCCTGCATGTTGTTAGAACAGGGGTGGCTGGTTGGCGCGCGCCGCGTT
122093	+	2523.84	internal,	I:gene_id "EG11088"; gene_name "pdhR";	AAATTGGTAAGACCAATTGACTTCGGCAAGTGGCTTAAGACAGGAACTCATGGCCTACAGC
122968	+	10339.2	orphan		CAACTAAACGTAGAACCTGTCTTATTGAGCTTTCCGGCGAGAGTTCAATGGGACAGGTTCC
127845	+	2122.46	orphan		CCAGAATCCCCAGGAGCTTACATAAGTAAGTGACTGGGGTGAGGGCGTGAAGCTAACGCCG
131614	+	7299.76	orphan		GTGAAGAGAATCGCCTGCCGCACTATGACAATGAGAGCGAGGAGAACCGTCGTGCTAGAAG
134269	+	3032.53	orphan		AGCGCACGCGCTGCGCATAAACGACACAATGCCCGGTGAATGAGATTCCCGGGCATTTTTT
141973	-	78198.9	primary, antisense,	P:gene_id "EG12319"; gene_name "can";,A:gene_id "EG20098"; gene_name "hpt";	CGCCAACCACAAATAAAAATGCCATGCCGGATGCAACACATCCGGCAACTTCACACTTACT
146275	-	41033.9	primary, antisense,	P:gene_id "EG11747"; gene_name "panD";,A:gene_id "EG11749"; gene_name "yadE";	CAGGTTGCTTGATTGTTATCCCTGCGGCTGGTTACTCACCAGCCGCGACATCGTCTCCAGC
160097	-	254767	internal,	I:gene_id "EG11362"; gene_name "gluQ";	TACAGCCGTTCCATCACGTTTACCACAGGCGGGAAATGCTCCCGCCTTATTTTTTGTTCAA
160652	-	48010.7	orphan		TTTAGATAATTGCTATCCGGAAAAGCATCTGCTATTTATAGCGGCCTCATTTTTCCCCCGA
174967	+	1856.29	orphan		TGCTATTCTATGTTATTCATAACAAGTTAAATACTCGTCAAACATCAGGCTGCTTGTACTG
175126	+	1296.05	internal,	I:gene_id "EG12331"; gene_name "clcA";	CTTATTTGTATGACCAATAAGTGATCATTGGATGAAAACTGATACTCCCTCTTTAGAAACA
175237	+	1318.37	internal,	I:gene_id "EG12331"; gene_name "clcA";	GCGCGATAAAACCCCGTTAGCCATTTTGTTTATGGCGGCAGTCGTCGGCACGCTTGTTGGG
176995	+	2597.68	primary, antisense,	P:gene_id "EG12332"; gene_name "erpA";,A:gene_id "EG12333"; gene_name "yadS";	TAGTATCTAATCTGTTGTTCATGTGCCGGATAAACTATCCGGCACATCTTCTCTCTTCAAC
178421	-	58856	primary, internal,	P:gene_id "EG11090"; gene_name "mtn";,I:gene_id "EG12334"; gene_name "btuF";	AACTTGCACATGGCTAAGTCACTGTTCAGGGCGCTGGTCGCCCTGTCTTTTCTTGCGCCAC
183649	-	131285	antisense,	A:gene_id "EG12335"; gene_name "cdaR";	GACGGTTAATTCGGGCATTCCCCTCTACCCTTCGGGCTGAGGGGAATGAGCCAGCGCCGCC
185087	-	114224	primary,	P:gene_id "EG10207"; gene_name "dapD";	CGTACCATCGACTAAAAGTATGCACACGGGCAGCACGACGCTGCCCGATTTTTTTGCAGGG
189839	+	3893.74	internal,	I:gene_id "G0-8895"; gene_name "tff";	GGCACATATTCCGGGGTGCCCTTTGGGGTCGGTAATATGGGATACGTGGAGGCATAACCCC
190800	+	1963.61	orphan		GACCAGGTAGTACACGTTTGGTTAGGGGGCCTGCATATGGCCCCCTTTTTCACTTTTATAT
192871	+	1760.12	orphan		CTGTGTGTGACTGTCTGGTCTGACTGAGACAAGTTTTCAAGGATTCGTAACGTGATTAGCG
192996	+	1578.96	internal,	I:gene_id "EG10335"; gene_name "frr";	CAAAATACGCACGGGTCGTGCTTCTCCCAGCCTGCTGGATGGCATTGTCGTGGAATATTAC
194843	+	30591.2	orphan		TAAGTAGTTGGCTTTATAAGGTCAGATATGCCGTGGTTTTACACGGCTTTTTTTTGTATAG
200800	+	1969.18	internal,	I:gene_id "EG10455"; gene_name "skp";	AGCGCCAGACTTTTGCTCAGAAAGCGCAGGCTTTTGAGCAGGATCGCGCACGTCGTTCCAA
201053	+	1663.96	internal,	I:gene_id "EG10316"; gene_name "lpxD";	GCAGTTGGATGCAGAACTACACGGTGATGGCGATATCGTCATCACCGGCGTTGCGTCCATG
202064	+	1216.63	orphan		GCCAAACTTTACGGCCTGTCTCATTCTTACGATTGCGGCAGGCCGTGTTATTATTGTCGTT
202315	+	1024.31	internal,	I:gene_id "EG11284"; gene_name "fabZ";	CCCTGGAAAACCGATTTTCCCGGGTGTGCTGATTCTGGAAGCAATGGCACAGGCAACAGGT
214116	-	205301	internal,	I:gene_id "G372"; gene_name "yaeP";	CTTGCATCCACGGTTAAGTCAGAGTGCTGACAGGAGGGCATGTGGAAAAATATTGTGAGTT
219994	-	74330.6	internal,	I:gene_id "EG11502"; gene_name "rcsF";	AAGCTCCTGATTCAATATTGACGTTTTGATCATACATTGAGGAAATACTATGCGTGCTTTA
223766	+	2303.62	orphan		CAAGAGTGAACACGTAATTCATTACAAAGTTTAATTCTTTGAGCATCAAACTTTTAAATTG
225751	+	13881.8	orphan		AGTCTCTCAAATTTTCGCAACACGATGATGGATCGCAAGAAACATCTTCGGGTTGTGAGGT
229007	+	2631.16	primary,	P:gene_id "EG30024"; gene_name "aspU";	TGCCTGTCACGCAGGGGGTCGCGGGTTCGAGTCCCGTCCGTTCCGCCACTTATTAAGAAGC
233778	-	316797	internal,	I:gene_id "EG10246"; gene_name "mltD";	AGGCACGATGGATGGACGATGGGACGTCTATCGCGCCAGATGGTGACTTGTGGGCTTTCAT
237009	+	826711	primary,	P:gene_id "EG30025"; gene_name "aspV";	CTGCCTGTCACGCAGGGGGTCGCGGGTTCGAGTCCCGTCCGTTCCGCCACTATTCACTCAT
240855	+	1205.47	primary, antisense,	P:gene_id "G6104"; gene_name "ivy";,A:gene_id "G6105"; gene_name "fadE";	AATTTTAAATAATTAGCGGATAAAGAAACGGAGCCTTTCGGCTCCGTTATTCATTTACGCG
255715	-	501863	internal,	I:gene_id "EG10695"; gene_name "pepD";	CCTGTGACCTGCAATACTGTTTTGCGGGTGATCGACAAGGAGACTTAACGTGTCTGAACTG
257907	+	1120.46	internal, antisense,	I:gene_id "EG11092"; gene_name "crl";,A:gene_id "G0-16637"; gene_name "insB9";	GCAGATTGATCAAAAAATTTACCGCACTAGGCCCGTATATTCGTGAAGGTAGGTAATGACT
258727	+	1227.78	internal,	I:gene_id "EG11092"; gene_name "crl";	GAAGGTAAGTGCAAAGATAATCGATTCTTTTTCGATTGTCTGGCTGTATGCGTCAACGTGA
258926	+	1103.73	internal,	I:gene_id "EG11092"; gene_name "crl";	AAGTGGTTGAACGACTGGAGCACACCCTGCGTGAGTTTCACGAGAAGCTGCGTGAACTGCT
259042	+	7486.5	primary, antisense,	P:gene_id "EG11092"; gene_name "crl";,A:gene_id "EG10729"; gene_name "phoE";	AAGTTAACGGCGTGAGTGAAATGTGCCGGATGCATCACATCCGGCAATATTCATTAAAACT
262946	+	16572250	primary,	P:gene_id "EG30104"; gene_name "thrW";	AGCGCATTCGTAATGCGAAGGTCGTAGGTTCGACTCCTATTATCGGCACCATTAAAATCAA
295416	-	44142	internal,	I:gene_id "G6151"; gene_name "yagN";	AGAGGTTGTCGAGTATCTCAAAGGAACATACTCAGCTCTTCGCAAGTCTGTCGCATGCGCC
297254	+	1029.88	antisense,	A:gene_id "G0-10738"; gene_name "nc1";	ATCGCATTCGTAATGCGAAGGTCGTAGGTTCGACTCCTATTATCGGCACCATTAAAATCAA
304212	-	87903.7	orphan		GTTCCCCAGCCAACCGCGGTACGTTCTTACATACGATGTACCGCTGTTCTCTTTACGATTT
310323	+	2240.93	antisense,	A:gene_id "G6164"; gene_name "ecpA";	GCCCAGTACGCCGTTGGCGGTATCGATCATCACGGTATCGCCAGTTTTTTCGACTGCCGCG
313047	-	59236.2	orphan		ATCCTCTCCCTTTTTTGTAAGTAATTATTATATCCGTGGGAGAGGAATACACGCTGTCAGG
324603	-	126276	orphan		GACAATGACCGGGAAGGGAACCCGTTTTCAGGAATGGATGCCTGTCTTTTTCACTGTAAAT
329153	-	61583.8	internal,	I:gene_id "EG10111"; gene_name "betI";	GATCATCAGCCACTATTTCAGGGACAAAAATGGTCTGCTGGAAGCAACCATGCGCGATATC
329307	-	50358.2	internal,	I:gene_id "EG10111"; gene_name "betI";	CGCTGATGAATGGAGTGGCGAAAATGCCCAAATTGGGGATGCAGTCGATCCGGCGCAGACA
329541	+	1098.15	internal,	I:gene_id "EG10112"; gene_name "betT";	AGGACAAAATCAATCCGGTGGTGTTTTACACCTCCGCCGGACTGATTTTGTTGTTTTCCCT
344013	+	1131.62	orphan		ATATTAACTTCGCTCTCCACTTAACTTTTTAGTTAAGGAGAGCGAAATAATATCAAAGTAG
345390	+	4396.85	orphan		TTAGCTCATCAGGAAGAGCAGACGACAACCAGGATTGTTGTATGGTACGGGGTTCGAGGCC
346858	+	64659.4	antisense,	A:gene_id "G6195"; gene_name "prpR";	ATCTATTGAAATTTATGCCGGATAAAGCGTTCGCGCTGCATTCGGCAGTTCAGCTTTTCAG
377325	-	100650	antisense,	A:gene_id "G6207"; gene_name "yaiL";	AACCGTAGGCCTGATAAGACGCGCATAGCGTCGCATCAGGCATCTGCGCACGACTTATCTA
377694	+	1403.37	antisense,	A:gene_id "G6208"; gene_name "frmB";	ATATTCATCTCCTGGCAGATCTTTTCAAGATTTGGAGTCCGCAGCTGTTCTGCGTAAAAAT
401850	+	1510.69	internal,	I:gene_id "EG10727"; gene_name "phoA";	GACAAAAGCCCGGACACCAGAAATGCCTGTTCTGGAAAACCGGGCTGCTCAGGGCGATATT
403649	+	4849.77	primary,	P:gene_id "EG11401"; gene_name "psiF";	TGATACCTGATAGTGCTAACGGGTGAGCTACGAAAATGGCTCACCCGAAATATCATACTTC
407206	+	9592.23	primary,	P:gene_id "EG11093"; gene_name "yaiA";	CCTGACAAAGAGTGACCGCATCAGACTGCTCGGAAGGGATTCTGAGTGCCACTACAAGGGA
408495	+	5075.56	primary,	P:gene_id "EG12159"; gene_name "yaiE";	TGTGCCGCTATCTGTAATTCCTCGCCTTCCCCTTGAACGGGAGGGCATTTTTCTGAAATAT
427790	+	4957.09	internal,	I:gene_id "EG10938"; gene_name "secD";	GATCCGGCTGTTCAGATCACTGGTGCGCGCGGAGTCGCCGCCAGTGAGCAAACGCTGATCC
438376	+	1386.64	antisense,	A:gene_id "G6237"; gene_name "dxs";	AGGCCTTGATTTTGGCTTCCATACCAGCGGCATCGAGGCCGAGTTCGGCGCGCATTTCTTC
441409	-	73950.2	orphan		TATACCACTAACATCGCTTTGCTGTGCACATCACCTTACCATTGCGCGTTATTTGCTATTT
445327	+	1381.06	antisense,	A:gene_id "G6241"; gene_name "yajR";	CGCAGCAGGCAATTCGCCGCGTTTTTTATGCCTGACGAATTGCCTGTTCTATCTCAAAGCG
448211	-	43381.5	internal,	I:gene_id "EG10180"; gene_name "cyoC";	GGCTTCCTGTCAGCGTTCTTTGCGCTGGTCGGCACGCACGGTCTGCACGTCACTTCTGGTC
448345	-	44522.3	internal,	I:gene_id "EG10180"; gene_name "cyoC";	CCATGTACAAAAACAACAAAAGCCAGGTTATCTCCTGGCTGGCGTTGACCTGGTTGTTTGG
448497	-	67733.9	internal,	I:gene_id "EG10180"; gene_name "cyoC";	TCTGTTCTCTATCTTGTTTGCTACCTATGCCGTTCTGGTGAACGGCACCGCAGGCGGCCCG
451269	-	48390.9	internal,	I:gene_id "EG10178"; gene_name "cyoA";	TTAATCATCATCTTCCTTGCAGTACTGACCTGGAAAACCACTCACGCTCTTGAGCCTAGCA
451528	-	359732	internal,	I:gene_id "EG10178"; gene_name "cyoA";	ATGGTTGTCATTATTTGCAGGCACTGTATTGCTCAGTGGCTGTAATTCTGCGCTGTTAGAT
452393	-	209865	internal,	I:gene_id "EG12183"; gene_name "ampG";	TCGGCCCCGTGGCGGGTTGGTTTGTTGAAGCACACGGCTGGTCGACATTCTATCTATTCTC
454868	+	9540.68	orphan		CCAGTATGTTGCTAAAGATTTTATGAAAAACGGCCTGCGGGCCGTTTTGTTTTGTCTGGAT
457390	+	1392.21	orphan		GGCACAACGCTGTAAGCGGCTTGCGCCTGAGAATGGCATTTGCGTCGTCGTGTGCGGCACA
457838	+	1318.37	internal,	I:gene_id "EG10159"; gene_name "clpX";	CGGTTCCGGTAAAACGCTGCTGGCTGAAACGCTGGCGCGCCTGCTGGATGTTCCGTTCACC
461784	+	19631.8	orphan		CAGTGGGGATGTGACGAAGTTCAAGGGCGCATCTACTGATGTGCCTTTTTTATTTGTATTC
461950	+	1856.29	internal,	I:gene_id "G6242"; gene_name "ppiD";	GAGTGTTGTTACACCATGATGGACAGCTTACGCACGGCTGCAAACAGTCTCGTGCTCAAGA
463858	+	1194.31	orphan		AAATGCGTTGCAGCTGTAACAAGAAAAGGTCGCTTTCGCGGCCTTTTCCATTTCTGAACAT
476561	+	8558255	primary,	P:gene_id "EG30027"; gene_name "ffs";	GCCAAGGCAGATGACGCGTGTGCCGGGATGTAGCTGGCAGGGCCCCCACCCATTTCTGCCT
478552	-	101031	internal,	I:gene_id "G6252"; gene_name "pdeB";	CTGGTCGGCCTTATTTCGGGAGTACTGATTCTTTCAGTATTGCTGCCTGTCGGCTTAAGCA
479132	-	44522.3	internal,	I:gene_id "G6253"; gene_name "ylaC";	AAACCCCGCTTTAGTATCAGTTTTATCCGTAAACATCCGGGGCTGTTTATCGGTATGTACG
479250	-	114604	internal,	I:gene_id "G6253"; gene_name "ylaC";	TTAAAATAGGGTGTTCCCTGGAAAGTTGCAGATACCACGAAGGCAAACGATGACCGAAATA
479917	-	71222.2	internal,	I:gene_id "G58"; gene_name "maa";	ACTTTTCGTCTTACTGTGTTGCCGCATTTTCAGCAACCGGAGGTCAGTAATGAGCACAGAA
480307	-	83654.9	primary, internal,	P:gene_id "EG12429"; gene_name "tomB";,I:gene_id "EG10439"; gene_name "hha";	AATCCTGCGAGTTTATCTTGTTAGAATTATTACAACCATAGGTAGAAGTATGTCCGAAAAA
480439	-	55747.9	internal,	I:gene_id "EG12429"; gene_name "tomB";	GAGCAGATCGACGAATATCTGGATGACACCTTTATGTTGTTCAGTAGTTATGGTATTAATA
480636	-	52259.6	internal,	I:gene_id "EG12429"; gene_name "tomB";	GACATGATATCGCACAGCTTAAGTTTCTCTGTGAAACCCTGTATCATGACTGCCTTGCAAA
489902	-	336140	antisense,	A:gene_id "G6255"; gene_name "mscK";	AACGCGCACTTTGTTAGCAATCTCGGGGCAACTAAATGTTGCCCCCTTTCGTTTTTACCCT
497940	+	1488.38	orphan		ACAAGCAAACTTATCAGCAATCTCAGGCCGGATATTCATTCGGCCTTTTACAAAAACCTCA
506602	+	1414.53	primary, antisense,	P:gene_id "EG11060"; gene_name "ushA";,A:gene_id "EG12454"; gene_name "ybaK";	GTGAGCTGGCAGTAATCCGAAAGTGCCGGATGTTTGCATCCGGCACAATGCTTAATCGCGG
507287	+	552306	primary, antisense,	P:gene_id "G0-9382"; gene_name "chiX";,A:gene_id "G6258"; gene_name "ybaP";	AAAAATGAAATTCCTCTTTGACGGGCCAATAGCGATATTGGCCATTTTTTTAGCGCAACAT
530080	+	1691.86	orphan		TGTTTTGGATAAGGATTCGACACTCATATCAAAACCGGTAACTCTCAACCTTTCAAGGCCA
533862	+	14221.8	primary,	P:gene_id "G6276"; gene_name "allR";	AAAGCACATCCATAATGTCTGTCGCATCCCGCTCTGCGGAGCGGGTTTTTTTGACAAAATT
553873	-	55367.6	internal,	I:gene_id "EG12666"; gene_name "lpxH";	TGCAGATCTTCATCTCTGCGTGGAAGAACCGGCGATCACCGCCGGTTTTCTGCGTTTTTTA
564799	+	13647350	primary, antisense,	P:gene_id "EG30014"; gene_name "argU";,A:gene_id "EG10507"; gene_name "intD";	AACGACCTTCTAAGTCGTGGGCCGCAGGTTCGAATCCTGCAGGGCGCGCCATTACAATTCA
572349	+	1584.54	orphan		CAACACGGCATAATTATGTCACCGGAGCCTGAACAACTCCGGTGACTTCTGCGCTAAACGG
584631	-	105660	primary,	P:gene_id "EG10673"; gene_name "ompT";	AAGAACGCCAACTAAAATTTCCCCGAGGTGAAAATCGCCCCGGGGAATAACTAGCCATTTC
607736	-	1247780	orphan		GTTTGGAGTGGCAGCCCCAGGGTTGATAGAAATATCTCCTGGGGCTTCATCTTTCCAGACC
622152	-	241194	internal,	I:gene_id "EG10296"; gene_name "fepD";	CATGGAAGTTCGTATGTCTGGTTCTGTTGCCGTGACACGCGCCATTGCCGTGCCCGGATTG
629914	+	9744.17	internal,	I:gene_id "EG10167"; gene_name "cstA";	TCTCTATGGACACGCACACGGATAACAACTATGAACAAATCAGGGAAATACCTCGTCTGGA
630285	+	1216.63	internal,	I:gene_id "EG10167"; gene_name "cstA";	GCCGGGGATGATCTGGCTGCTCGCTGGGGTGGTTCTCGCCGGTGCGGTGCAGGATTTCATG
632098	+	1686.28	orphan		GTTCCCTCTCACCCTAACCCTCTCCCCGGTGGGGCGAGGGGACTGACCGAGCGCGTTGATA
638796	+	1867.44	orphan		CCAAAGGGTAGTTCAGATTACACGGTCACCTGGAAAGGGGGCCATTTTACTTTTTATCGCC
639670	+	7689.98	orphan		AATACTTCGGAAATTCACCTAATTCTTCGGGTGCTGCGGCACCCGATTTTCTTCCCCGCAC
657545	+	46893.8	primary, antisense,	P:gene_id "EG12179"; gene_name "cspE";,A:gene_id "EG12209"; gene_name "crcB";	TCTGTAAGATACGTCAGCAAGAATTCAAAACCCGCTTAATCAGCGGGTTTTTTTTGGTCTT
660220	-	82067.9	orphan		ATCTATTGAATTGAAACGCTTTCCTTCGTAATTCGCAACTGGAACACGCACGCTATGAGTA
662338	-	48390.9	primary,	P:gene_id "EG11592"; gene_name "ybeD";	GGTTCTGTAACTCGCTTCTCCGTTACCCGGCTCCTGGTCGGGTAACTCCCCTCTCCTCGCT
664017	-	41794.4	orphan		AATGACGTTAACAAAGTCACGCGGAAAGTCAGATGCCTGCCGGTAGTGCATTTGCTATAGT
664101	+	1788.02	antisense,	A:gene_id "EG10854"; gene_name "rlpA";	ACTTTGTTAACGTCATTTACAGAAATTGACACATCAGATGCCTGCTTTACGCTACTGCGCG
675562	+	25121.2	antisense,	A:gene_id "G6351"; gene_name "ybeQ";	CGCACAGCAATAAAGAGAATATGGGCCGAATGAAATTCCCCGGCCCTTGTTTTTATCTCTA
675677	+	4300.69	antisense,	A:gene_id "G6351"; gene_name "ybeQ";	CTGAACTTTACGATACAGGTCGAGAGCCTGTCGGAGATCGACAGGTCTTCCTTCTCCGTAG
686689	-	84415.4	internal,	I:gene_id "G0-9383"; gene_name "sroC";	CAATACGCTGGGTAACAATCTTCGAGGGTAGCAGTTAACGCTGCTACCCTCTTTTTTCTGG
696428	-	2861440	primary,	P:gene_id "EG30031"; gene_name "glnX";	CGGATTCTGATTCCGGCATTCCGAGGTTCGAATCCTCGTACCCCAGCCACATTAAAAAAGC
696963	-	178134500	primary,	P:gene_id "EG30052"; gene_name "leuW";	TAGGTTCTGGCGCCGCAAGGTGTGCGAGTTCAAGTCTCGCCTCCCGCACCATTCACCAGAA
701367	-	48010.7	internal,	I:gene_id "EG10636"; gene_name "nagC";	GGGCTGATCAAAGAAGTTGATCAGCAGGCCTCCACCGGGGGCCGCCGCGCTATCTCCATCG
701696	-	48010.7	internal,	I:gene_id "EG10632"; gene_name "nagA";	ACGCTCTATCCGGCGCGTGCGATTGGCGTTGAGAAACGTCTCGGCACACTCGCCGCAGGTA
708334	+	2631.16	internal,	I:gene_id "G6370"; gene_name "chiP";	TCGCTGTTCACCTTTGGTGCAGCAATTTATACGTCAAAGAGGATTAACCCATGCGTACGTT
710532	-	61203.6	internal,	I:gene_id "EG10359"; gene_name "fur";	TCCTGGAAGTTCTTCAGGAGCCGGACAACCATCACGTCAGTGCGGAAGATTTATACAAACG
710645	-	180817	internal,	I:gene_id "EG10359"; gene_name "fur";, gene_id "G0-10580"; gene_name "uof";	GTCACTTCTTCTAATGAAGTGAACCGCTTAGTAACAGGACAGATTCCGCATGACTGATAAC
733551	+	1686.28	internal,	I:gene_id "EG10848"; gene_name "rhsC";	GGGCCAGGTAAAGCAAGTAATGATACAAAAGAAGCTGCTGGCCGTTGTGACCTCGTTGAAA
739045	+	2586.53	internal,	I:gene_id "EG11108"; gene_name "ybgA";	GCAGTAATGAATCTACAACGATTTGATGACAGCACCCTAATCCGTATCTTTGCCCTTCATG
753129	-	344638	orphan		GATTGCTAAGTTGTAAATATTTTAACCCGCCGTTCATATGGCGGGTTGATTTTTATATGCC
754647	-	46109.3	orphan		GTTATTAGTGGTAGACAAGTTTAATAATTCGGATTGCTAAGTACTTGATTCGCCATTTATT
755098	+	2048.61	orphan		TAGAAAGGACGCTGTCTGACCCGCAAGCAGACCGGAGGAAGGAAATCCCGACGTCTCCAGG
757887	+	2155.93	internal,	I:gene_id "EG10932"; gene_name "sdhB";	CGTTCCGCCGCTCCTGCCGTGAAGGTGTGTGCGGTTCCGACGGTCTGAACATGAACGGCAA
758707	+	2971.17	internal,	I:gene_id "EG10979"; gene_name "sucA";	GTAGTATCCACGGCGAAGTAAGCATAAAAAAGATGCTTAAGGGATCACGATGCAGAACAGC
759183	+	2325.93	internal,	I:gene_id "EG10979"; gene_name "sucA";	CATTTGCCAGCGGCAAAGAAACCATGAAACTCGGCGAGCTGCTGGAAGCCCTCAAGCAAAC
762937	+	1499.53	orphan		GCGATGCCTGATGTGACGTTTAACGTGTCTTATCAGGCCTACGGGTGACCGACAATGCCCG
765148	+	34703.6	antisense,	A:gene_id "EG11109"; gene_name "mngR";	CGAAGGGCTGTCGGTTTCGACATGGTTGGCCATCGTATGATGGCCTTTTTTGTGCTTATCG
771482	+	1301.63	internal,	I:gene_id "EG10173"; gene_name "cydA";	CTTCATGCGATGAGCAAGGAGTCATGATGTTAGATATAGTCGAACTGTCGCGCTTACAGTT
774374	+	1493.95	internal,	I:gene_id "EG12395"; gene_name "ybgE";	GCGACTTTGTATGCGGTAATGGACAAGCGCCCCCTGCGGGCGCTTTCCTTCGTGATGGCGC
779674	+	1765.7	internal,	I:gene_id "EG12854"; gene_name "cpoB";	ATTGAGTCTGTCGTTACTGGTTGGTATAGCGGCCCCCTGGGCCGCTTTTGCTCAGGCACCA
780632	+	5596.74	primary,	P:gene_id "EG30055"; gene_name "lysT";	TGACTTTTAATCAATTGGTCGCAGGTTCGAATCCTGCACGACCCACCAATCGCTAAGGTGG
780842	+	132473	primary,	P:gene_id "EG30109"; gene_name "valT";	CTCCCTTACAAGGAGGGGGTCGGCGGTTCGATCCCGTCATCACCCACCACCGGGTCGTTAG
781146	+	11243.7	primary,	P:gene_id "G6389"; gene_name "valZ";	TCCCTTACAAGGAGGGGGTCGGCGGTTCGATCCCGTCATCACCCACCACTCGGGTCGTTAG
781447	+	1211.05	primary,	P:gene_id "G6391"; gene_name "lysZ";	TGACTTTTAATCAATTGGTCGCAGGTTCGAATCCTGCACGACCCACCAATTTAAAGGTGGT
784890	-	265992	primary,	P:gene_id "G6394"; gene_name "ybgS";	GTAACCCTGCAAAATAGCCAATAATGGGAGAGCGGAGTCTCTCCCTTTTAATTTTTCACTT
787769	-	39893.1	primary,	P:gene_id "EG11698"; gene_name "galM";	AATATCAGTTTATTGCTGAGTAATGTTACGCCCTCGTCATGAGGGCTTTATCTCATATTGT
794828	+	4481.86	internal,	I:gene_id "G6396"; gene_name "acrZ";	AGAGTTATTAAAAAGTCTGGTATTCGCCGTAATCATGGTACCTGTCGTGATGGCCATCATC
794956	+	3015.8	primary,	P:gene_id "G6396"; gene_name "acrZ";	CCGGACAAAATCATTGATTCCCTGAATGCCCGCTTAGTCGGGCATTTTCTTTTTCTCAACT
805821	-	41414.2	orphan		GCCTTATCTGGCCTACAGATTCGATGCGATTCGTAGGTCGGATAAGATGCGCAAGCATCGC
817052	+	12913.2	internal,	I:gene_id "EG11595"; gene_name "moaA";	AAGGAAGAAATGACTTCGCCTCCCGTATCTGGAAAGGTGTACATGGCTTCACAACTGACTG
819885	+	1205.47	internal,	I:gene_id "G6403"; gene_name "ybhL";	TCATTTTGCAGTATCCTTAAGATATTCCTTATATCTTCAGGAGATCGTCATGGACAGATTC
825080	+	3032.53	primary, antisense,	P:gene_id "G6408"; gene_name "ybhQ";,A:gene_id "G6409"; gene_name "ybhR";	TACGCCGCTGACCCTGTCGTGGCCGTTATCACCAGTAGCGGCCACAAACTATTCCACACAA
838167	-	124308	primary,	P:gene_id "EG12421"; gene_name "ybiI";	AGGTTCGAAAGACAGCCAGTTACGTTAACTACAACTGGCGAGATGCATAGCGAGTATAATT
847200	-	130459	orphan		ACACCTGTAAAACGCACTGGCAGTTCCCTCTCCCCTATGGGGAGAGGATTAGGGTGAGGGG
848057	-	47250.1	orphan		GCCGCATCTCGAAAAATCAAGGAGTTGCAAAACTGGCACGATTTTTTCATATATGTGAATG
848340	-	681605	orphan		CAGAACTTTAGTACCCGATAAAAGCGGCTTCCTGACAGGAGGCCGTTTTGTTTTGCAGCCC
848673	-	51879.2	internal,	I:gene_id "EG11415"; gene_name "dps";	TGAAATGCTGGATGGCTTCCGCACCGCACTGATCGATCATCTGGATACCATGGCAGAACGT
848852	-	82448.1	internal,	I:gene_id "EG11415"; gene_name "dps";	GCTAAATTAGTTAAATCAAAAGCGACCAATCTGCTTTATACCCGCAACGATGTCTCCGACA
850273	+	2790.01	orphan		ATCATTAGTCTGGTGATTAGGAATAATCTGGATGAATGACAGGGAAAACATGCGTAATACT
850459	+	3237.34	internal,	I:gene_id "EG12117"; gene_name "ompX";	TTTAAAACTTAGGACTTATTTGAATCACATTTGAGGTGGTTATGAAAAAAATTGCATGTCT
850735	+	1029.88	internal,	I:gene_id "EG12117"; gene_name "ompX";	ACTACAACAAAAACCAGTACTACGGCATCACTGCTGGTCCGGCTTACCGCATTAACGACTG
852816	-	242400	internal,	I:gene_id "G0-8881"; gene_name "rybA";	GCGTCGCGGTACGCCGCTTCACTCCTGCTTTCATGCAGGCATAACGCGTTTTGGTCTGAAA
852973	-	92152.4	internal,	I:gene_id "G0-8881"; gene_name "rybA";, gene_id "G0-10715"; gene_name "mntS";	ACGGGATTAGCAAGTCAGGAGGTCTTATGAATGAGTTCAAGAGGTGTATGCGCGTGTTTAG
853194	+	1205.47	internal,	I:gene_id "G6420"; gene_name "mntR";	GAGAACGCTATGTATGCGTCACCATAATGAGGAAGCACAATGAGTCGTCGCGCAGGTACGC
870014	-	426326	antisense,	A:gene_id "G6430"; gene_name "gsiB";	TATGCTGTCCAGTTTGGGCAATCCTGGCTGCCAGTAACCCGCGAATTTTTTCACCTTCACA
887977	-	135914	primary, antisense,	P:gene_id "G0-8880"; gene_name "rybB";,A:gene_id "G6444"; gene_name "rcdA";	GTGGAGCCCATCAACCCCGCCATTTCGGTTCAAGGTTGATGGGTTTTTTGTTATCTAAAAC
890462	-	41033.9	primary, antisense,	P:gene_id "EG10417"; gene_name "grxA";,A:gene_id "G6446"; gene_name "ybjM";	AAAATCTGGACGCCTGATCGTCTGACAAGCCCTCGCGTTGAGGGCTTTACTGATTTTTTCT
903102	-	44522.3	internal,	I:gene_id "EG11624"; gene_name "artP";	GTGATCGTCACCCACGAAGTTGAAGTGGCGCGTAAAACCGCCAGCCGAGTGGTGTATATGG
903667	-	44902.5	internal,	I:gene_id "EG11624"; gene_name "artP";	CGGCATTAATTGCTTCTACGGCGCGCATCAGGCGCTGTTCGATATCACGCTGGATTGCCCA
903889	-	55367.6	orphan		CCAATAAACCCCGTAAATTGTCCGGCATTTCGTGAGGAATGCCGACATTTATGCTCGCCGA
904417	-	57334.9	internal,	I:gene_id "G6450"; gene_name "ybjP";	ATGCGCTACAGCAAATTGACAATGCTTATCCCCTGCGCACTGCTCCTCAGTGCCTGCACCA
922302	-	41033.9	antisense,	A:gene_id "G6462"; gene_name "macB";	TTGTGTACATCCTAAAGGCAAAATGCCAGCCCGATCGGCTGGCATTTTTATCTCAAAAATT
922516	-	77438.6	internal,	I:gene_id "EG11111"; gene_name "cspD";	TTCAACAATGCCAAAGGGTTTGGTTTCATCTGCCCTGAAGGCGGCGGCGAAGATATTTTCG
923210	+	16089.2	internal,	I:gene_id "G6463"; gene_name "clpS";	CCAAAGTGGCGATGGTGAACAAGTACGCGAGGGAGAATGAGCATCCATTGCTGTGTACGCT
924863	+	1199.89	internal,	I:gene_id "EG10156"; gene_name "clpA";	TGCGCTTTGATATGTCCGAGTATATGGAACGCCATACCGTCAGCCGTCTTATTGGTGCGCC
925599	+	1307.21	orphan		TTAGGTAGGTTGGTCAAGTCCGTAATCTCGAAAGAGGTTACGGACTTTTTGTTTATGGGGT
926568	-	116571	orphan		GTTTATCTCACCGCTCCCTTATACGTTGCGCTTTTGGTGCGGCTTAGCCGTGTGTTTTCGG
932430	+	9592.23	orphan		ATGTTTACCGTGCTAGTGAAATCTACGTATGGCGTGGACAGACGCCATTCGTGATGTCGAT
933176	+	2693.84	orphan		ACTCCTGTTAATCCATACAGCAACAGTACTGGGGTAACCTGGTACTGTTGTCCGTTTTAGC
934931	+	1323.94	internal,	I:gene_id "G6464"; gene_name "ftsK";	CTGGCGTGAAAAAAGCGACACTGGCGACGGGGGCTGCCGCAACCGTTGCCGCGCCAGTCTT
939546	+	2082.08	internal,	I:gene_id "EG10947"; gene_name "serS";	TAAGCTGGATGTAGATAAGCTGGGCGCTCTTGAAGAGCGTCGTAAAGTATTGCAGGTCAAA
944900	-	130079	primary, antisense,	P:gene_id "EG11241"; gene_name "ycaC";,A:gene_id "EG10234"; gene_name "dmsC";	CGTTAACGAAGCAGAAATAAAAGAGAACCGGGGCCGAAACCCCGGTTGTTATGATTAGCTT
951156	-	53466.3	orphan		TTTAGCGCGAGAGCCTTTTTTGTCAGCTATCTATACTTTAAGGTGACTGCCAAAACAGACT
964165	+	11391.4	orphan		TTTTTACTCAAACTTGAACGAGAGAAAAGCACCTGTCGGGTGCTTTTTTCATTTCTCTAAT
983026	+	1126.05	orphan		GTTGAGTCATCTTGACGTCTGCTTTACGGGCGGTTAAGGTGCCTCTTGTGCGCCAGAAGTG
985649	-	58095.4	internal,	I:gene_id "EG10096"; gene_name "aspC";	ACATTACCGCCGCTCCTGCCGACCCGATTCTGGGCCTGGCCGATCTGTTTCGTGCCGATGA
985842	-	90631.7	orphan		AGCACACCTCTTTGTTAAATGCCGAAAAAACAGGACTTTGGTCCTGTTTTTTTTATACCTT
986769	-	70461.9	internal,	I:gene_id "EG10671"; gene_name "ompF";	GTGGCAATGGCGACATGACCTATGCCCGTCTTGGTTTTAAAGGGGAAACTCAAATCAATTC
993275	+	2337.09	primary, antisense,	P:gene_id "EG10696"; gene_name "pepN";,A:gene_id "EG12358"; gene_name "ssuB";	ACTGGCTTGATAAATAACCGAATGGCGGCAATAGCGCCGCCATTCGGGGAATTTACCCCTG
1015759	+	1109.31	internal,	I:gene_id "EG50004"; gene_name "rmf";	CGAGGCATGAAGAGACAAAAACGAGATCGCCTGGAACGGGCACATCAACGTGGTTATCAGG
1015926	+	9625.7	primary, antisense,	P:gene_id "EG50004"; gene_name "rmf";,A:gene_id "EG10273"; gene_name "fabA";	GGCCTGATTCTGTCTCTTTAAAAAGAAACCTCCGCATTGCGGAGGTTTCGCCTTTTGATAC
1019851	-	83654.9	internal,	I:gene_id "EG10669"; gene_name "ompA";	CCATGAAAACCAACTGGGCGCTGGTGCTTTTGGTGGTTACCAGGTTAACCCGTATGTTGGC
1020119	-	563446	orphan		TAAGCCGAAGATATCGGTAGAGTTAATATTGAGCAGATCCCCCGGTGAAGGATTTAACCGT
1026525	-	136294	primary, antisense,	P:gene_id "G6497"; gene_name "mgsA";,A:gene_id "EG10426"; gene_name "helD";	CGCGGACCGTCTGAAGTAATATTGCACAGGTGGCAAACGCCACCTGTTTCTTACGGTTTTC
1028644	-	88664.1	internal,	I:gene_id "G6500"; gene_name "hspQ";	CAGCAGGTCCGCCATTCCCTGTTAGGTTATCTCGGAGTGGTCGTGGATATCGACCCGGTTT
1028807	-	40273.3	internal,	I:gene_id "G6501"; gene_name "rlmI";	TCAGGCAGCCGATCATCCGGTGATCGCTACCTATCCGGAAGGGCTATATCTGAAAGGGTTT
1030710	-	70081.6	primary,	P:gene_id "EG11113"; gene_name "yccA";	AATCTCACCCGCTAACACTTTCATAGCCTCGCTTTATGCGGGGCTTTGTTTTTTGTTACAC
1031143	-	46869.8	internal,	I:gene_id "EG11113"; gene_name "yccA";	ATTATCTCCGCATTCGCCTTTACCGGTTTTCTGGGTTATATCCTCGGACCTATTCTGAACA
1031409	-	73569.9	internal,	I:gene_id "EG11113"; gene_name "yccA";	ATGCTGCTTAATTAATTACATCTGTCATAGAGAGTGACTCAATGGATCGTATTGTTAGTTC
1031625	-	1563275000	primary,	P:gene_id "EG30093"; gene_name "serT";	AAACCGGCGACCCGAAAGGGTTCCAGAGTTCGAATCTCTGCGCTTCCGCCAAATAAGATAA
1041921	-	51879.2	antisense,	A:gene_id "EG10049"; gene_name "appA";	CTTCGTTTGTCATCAGCCTCAGAGCATTCAGGTAACTGAATGCTCTTTTTTATGCATTACA
1050549	-	171558	antisense,	A:gene_id "G0-10536"; gene_name "insAB-4";, gene_id "G6509"; gene_name "insB-4";	ACAAGGATGTTATACTCAAAGTAGACAATCCTGATCTCAAGCGTACGTATTGTCGGTAATG
1050653	-	100270	orphan		AGTCGTATTTCCAGAGGGGGATAGTTAACAATCTTATATTTCCCTCTGCGCGCCTTTCCTA
1051591	+	6779.9	internal,	I:gene_id "G6511"; gene_name "cspG";	CAAAGACGTTTTCGTCCATTTCACCGCCATCCAGAGCAATGAATTCCGCACGCTGAACGAA
1052279	+	2218.62	primary, antisense,	P:gene_id "G0-9662"; gene_name "gnsA";,A:gene_id "G6513"; gene_name "yccM";	AAAATAATGTGATTTTGTGAACATCACCCCGTGCGAGGTGATGTTCCGCTTGTTGCTAATT
1062547	+	1029.88	antisense,	A:gene_id "EG12194"; gene_name "cbpM";	CTGTAATCTTTGTAGACCGGTTAAGATGCGTCATCGCATCCGGCAAACACACATCACGGAT
1074879	-	55747.9	primary, antisense,	P:gene_id "EG10801"; gene_name "putA";,A:gene_id "EG12301"; gene_name "rutR";	TATAGGTTAAACAGGTAGCCGGAGGATGTTACAACCTCCTCCGGCATCTTTAACGTGGTCG
1077821	-	43381.5	internal,	I:gene_id "EG10801"; gene_name "putA";	AGCCGCGCCCAGTATGACCGGGTAATGGAAGAGCTTTACCCGCGTCTGAAATCACTCACCC
1078854	-	48010.7	internal,	I:gene_id "EG10801"; gene_name "putA";	TCTGAACAACAGGAGTAATGGCATGGGAACCACCACCATGGGGGTTAAGCTGGACGACGCG
1085072	+	1403.37	internal,	I:gene_id "EG11734"; gene_name "phoH";	GATAATCAACGCGCCACCACTCGCGGAGTTTTCTCCTCCGGTAGTCATCTCGTCACTTTGC
1092367	-	58095.4	orphan		CATCATCAACAATTCACGTCTCTCTTCCGCGTTTAATAACGGATTATGAGGTGCAAAAATA
1120653	-	138262	primary,	P:gene_id "G6557"; gene_name "bssS";	TAACATGACATGACCATCCACCCAAAAGGCACCTCACCGGTGCCTTTACCATTTCTGGGTT
1120893	-	61964.1	internal,	I:gene_id "G6557"; gene_name "bssS";	AATGAAGTCATTCAGACTCATCCGCTCGTAGGGTGGGACATCAGCACCGTTGATAGCTATG
1144499	-	101031	antisense,	A:gene_id "G6563"; gene_name "yceQ";	CTTTGATAATTGCGCTGTTTTTCCGCATGAAAAACGGGCAACCGACACTCTGCGCCTCTTT
1146757	+	2337.09	primary,	P:gene_id "G0-8862"; gene_name "sraB";	CAATGTGTGCGAATTATTGGCAAAAGGCAACCACAGGCTGCCTTTTTCTTTGACTCTATGA
1147708	+	3078.49	internal,	I:gene_id "EG11437"; gene_name "plsX";	GGGATTTTGGCCCTTCCGTGACAGTGCCTGCAGCATTGCAGGCACTGAATTCTAATTCGCA
1151239	+	1126.05	internal,	I:gene_id "EG11318"; gene_name "fabG";	ATTACTGTAAACGTTGTTGCTCCGGGCTTTATTGAAACGGACATGACACGTGCGCTGAGCG
1151888	+	90555.5	primary,	P:gene_id "EG50003"; gene_name "acpP";	GCCACCAGGCGTAAGTGAACATCTCCAGGCGGTCGTTCGACCGCCTGAGTTTTATCTTTTT
1196423	+	4600.34	primary,	P:gene_id "EG10489"; gene_name "icd";	ATGCCGTAGTTTGTTAAATTTATTAACGGGAGCGTAACGCTCCCGTTGTTTTTTGTTAGGC
1199695	+	1029.88	antisense,	A:gene_id "EG12370"; gene_name "intE";	AGAAATTCAATGTGGCGTTGAGATGCTTAAAGGTTCACAACGCTACTTTGCTCCATCCTTT
1201423	-	281534	orphan		TGTGAGAACTCCAGCATACCACCGAGCCTGAAGTGGTGAAAAGACAGGCACATAACAGCTA
1203751	-	27956200	antisense,	A:gene_id "G6591"; gene_name "ymfL";	AGAAGCAATCGACGCCACGACGCCCGGAGCTGCACACTCGCGGGCGTCATTACTTTCTGAA
1218619	-	40273.3	antisense,	A:gene_id "G6608"; gene_name "pdeG";	GATCCAATACACAATCCAGAATTCGGGTTGATTCTGGGTCTGCGTTTACGCGGCCAACGAA
1224224	-	88664.1	orphan		GCTGTAAAAGCGCATTTATCTTCAAGGCAGAGTTATCTCTGCCTTGAGTTTTTCATCCCTC
1226099	-	98749.1	orphan		CATGCCTTATAGTCTTCGGAACATCATCGCGCGCTGGCGATGATTAATAGCTAATTGAGTA
1226227	+	1499.53	orphan		TCACCCTCCCATTTATTCAGAGTAAAAGTCTATTCTGTGATAAATGGCGCTGATTCATAGC
1227065	+	1318.37	antisense,	A:gene_id "G6615"; gene_name "pliG";	CAGAGAGGAGTGGGGCATTAACGTTTATGACGGGGAGAGTCCCCGTCGGTTGACATTTACT
1235674	-	65452.5	primary, antisense,	P:gene_id "EG11516"; gene_name "ycgB";,A:gene_id "EG10281"; gene_name "fadR";	AATGGGAAATCTGTAAAAACAACAAAAAACCCCTCGTTTGAGGGGTTTGCTCTTTAAACGG
1240019	+	1029.88	orphan		GAGGCAACGTCTTCTGGGTGCAAAAAAATCATCCATCCGGCTGGTCAGCAACTGTAGTTGT
1258823	+	9648.01	internal,	I:gene_id "EG11533"; gene_name "ychH";	AAGTTCCGGAGGTGACATATGAAACGCAAAAACGCTTCGTTACTCGGTAACGTGCTCATGG
1259119	+	1878.6	primary, antisense,	P:gene_id "EG11533"; gene_name "ychH";,A:gene_id "EG12392"; gene_name "dauA";	ACAAATAATGCAGTTTGCTGACCAGTCAGTTTGCGCTGACTGGTCAATCTCGTACTTATAA
1262023	-	63485.2	primary,	P:gene_id "EG11294"; gene_name "ispE";	GTGGCGAAAGGCGCTAATCTTTCCCCATTGCACAGAGCCATGCTTTAAGCCGGGCAAGCTG
1263797	+	1691.86	internal,	I:gene_id "EG10427"; gene_name "hemA";	ACGGCACCTGTATCGCTGCGAGAACGTGTATCGTTTTCGCCGGATAAGCTCGATCAGGCGC
1269360	+	16786	internal,	I:gene_id "G0-9603"; gene_name "rdlA";	CTATTCTTGAATTGTTCTGGTTCAAGATTAGCCCCCGTTCTGTTGTCAGGTTGTACCTCTC
1269895	+	3860.26	internal,	I:gene_id "G0-9606"; gene_name "rdlB";	CTATTCTTGAAGTGTCTGGTTTCAAGATTAGCCCCCGTTCTGTTGTCAGGTTTTACCTCTC
1270430	+	2054.19	internal,	I:gene_id "G0-9608"; gene_name "rdlC";	CTATTCTTGAAGTGTCTGGTTTCAAGATTAGCCCCCGTTTTGTTGTCAGGTTTTACCTCTC
1287242	-	4314425	primary,	P:gene_id "EG30108"; gene_name "tyrV";	AAATCTGCCGTCATCGACTTCGAAGGTTCGAATCCTTCCCCCACCACCATCACTTTCAAAA
1287534	-	93293.3	primary,	P:gene_id "EG30106"; gene_name "tyrT";	ATCTGCCGTCATCGACTTCGAAGGTTCGAATCCTTCCCCCACCACCATAATTCACCACAGC
1289157	+	3973.16	antisense,	A:gene_id "EG12119"; gene_name "ychJ";	CTACCACAGGGACAAAGCTGAGACACAAATAATCTCCCTGGAAACAATAACGGCGTATTAA
1290239	+	1867.44	orphan		CGCAGGTGGCAATAGCATGCCACTATTGAGTAAAGCCAGTCAGGGGAGAGAACATGACGCA
1292461	-	144032	primary,	P:gene_id "EG10457"; gene_name "hns";	TAATCTTTTGTAGATTGCACTTGCTTAAAATCCCGCCAGCGGCGGGATTTTTTATTGTCCG
1292898	-	48010.7	internal,	I:gene_id "EG10457"; gene_name "hns";	CCCAATATAAGTTTGAGATTACTACAATGAGCGAAGCACTTAAAATTCTGAACAACATCCG
1295324	-	51499	orphan		ATCCTTAAACTGAGGCACTATAACGGCTTCCACAACAGGGAGCCGTTTTCTTATGCCACTT
1299498	+	5885.23	orphan		AATTGAAATGATATTATTAATTCCACTGCCTTTGGTAGAGGAAAGTGCTAAGGAAGGTGCG
1300921	+	7384.77	orphan		AAAATGTATTGGCGAGTAAGAACCGCATTTGGTACTTTCCGGGCAACCGCCAGACGATTCT
1301719	+	2229.77	internal,	I:gene_id "EG10674"; gene_name "oppA";	AAGCTATTGATGATCACACATTAGAAGTCACCTTAAGTGAACCCGTTCCGTACTTCTATAA
1302850	+	5171.73	primary,	P:gene_id "EG10674"; gene_name "oppA";	TTGTGAAGCACTAATGGCAATACGTGGGGCAGGAGTGTCCTGCTCCACGGTGTCTGATTTT
1308993	+	9745.52	primary, antisense,	P:gene_id "G0-8891"; gene_name "yciY";,A:gene_id "EG11606"; gene_name "kch";	TGCGATCTACAATATCTAAATGTACTGGGCACCATTGCGGTGCCCAATAAGTTTACTCTTC
1310520	-	62724.7	primary,	P:gene_id "EG11607"; gene_name "yciI";	GAATAGAGATTCAATATTTAAGGGCACGGTTTTTGCAACCGTGTTCTTGTTTGGCCTTTCC
1315788	-	44522.3	orphan		ATATCAGCTGATAAAGATAATTGCATCTGCGGGCCGTATGGCTCGCAGTGATTTCACTGGA
1333823	+	1493.95	orphan		TTTTATTATTAAATCGTATTAGTCACCCGCCAGGTGTGACGAAAAAACGATGTTCTGATGG
1335835	+	2116.88	internal,	I:gene_id "EG11325"; gene_name "acnA";	CCTGAAGAGAATCAGGGCTTCGCAACCCTGTCATTAAGGAGGAGCTATGTCGTCAACCCTA
1339157	-	51879.2	internal,	I:gene_id "EG11331"; gene_name "ribA";	TATGGCAAAATAAGCCAATACAGAACCAGCATTATCTGGAGAATTTCATGCAGCTTAAACG
1350207	-	43761.7	primary,	P:gene_id "EG11528"; gene_name "fabI";	GAAATAATCGTTCTGTTGGTAAAGATGGGCGGCGTTCTGCCGCCCGTTATCTCTGTTATAC
1361446	+	10560.7	internal,	I:gene_id "G6645"; gene_name "puuD";	GATCTTCTGAGCATGGCGATAATTAATGCCGCACTCGAAAGGCGCATCCCCATTTTCGCCA
1370040	+	1211.05	primary,	P:gene_id "EG10780"; gene_name "pspE";	AGGTCAAAGGTTAAAAGAATTCACCATGAGCGGCGCTTATGCGCCGTTTTTTTTTCTGTCA
1388306	-	165722	internal, antisense,	I:gene_id "G6660"; gene_name "tpx";,A:gene_id "EG11042"; gene_name "tyrR";	AATCACCACCGAGCCGGATTACGAAGCAGCTCTGGCTGTACTGAAAGCATAATTTAATATG
1397380	+	1301.63	internal,	I:gene_id "G6668"; gene_name "ynaJ";	GGTAACAAGAAATTTGTCTGCACAAGGATTACATCATGATTATGGCGAAACTGAAGTCAGC
1411270	+	1658.39	antisense,	A:gene_id "G6675"; gene_name "ttcA";	GAACATCGTCTCGATACGCCCTGGATAACGTTTATCCCAGTCACGCAACATGTCAGCAATC
1411374	+	2161.5	antisense,	A:gene_id "G6675"; gene_name "ttcA";	GAATAATCGGGAACGCTTTTGCATCGGCAAATCGCTGAATATCTTTCTCGCGGCAGTAGGC
1417486	+	146140	antisense,	A:gene_id "EG10813"; gene_name "racC";	TCTTGCCGGATACACACTGTTCATAGCCTGCGCCATACGCAGGCTATTTCTTTCAGATTTC
1419679	-	40653.7	orphan		TTATTTAACCCCCCCATCACTTTCTGCTGTCGCCATCACCTATTAGGTTACGCTCAAAACA
1420148	-	187348	internal,	I:gene_id "G6680"; gene_name "racR";	TTAACAAAAAAATCGCATCGGGATCCGTCAAATCAAAGGCGGAGGTCGCACGCCACTTTAA
1434552	-	76297.8	orphan		AATCCGTGTAGAGTCTCTGCATAAGATAGTTTGCAGTTGCCACTTCAGCTTGCGCCATAAA
1435153	-	347680	primary,	P:gene_id "G6699"; gene_name "uspF";	CGTGCTGGTTGTGCGCTGACACTAACGCCCGCACATTGCTGCGGGCTTTTTGATTCATTTC
1489709	+	9071.03	primary,	P:gene_id "EG10035"; gene_name "aldA";	TTTACAGTCTTAATGAGTGAAAGAGGCGGAGGTTTTTTCCTCCGCCTGTGCGCGTCAGAGT
1490499	-	59236.2	orphan		CTGGAGCGTTGATTTTACGGAAGATTCACTTATCGTTGATGGGAAAAGTATCGCGGTTTAC
1490664	-	66593.2	orphan		CATGAGTAAAGTTGGTATTAACGGTTTTGGTCGTATCGGTCGACTGGTGTTGGGTCGATTA
1491416	+	1024.31	internal, antisense,	I:gene_id "EG10172"; gene_name "cybB";,A:gene_id "G0-10592"; gene_name "rydC";	ACTGGCACACCACTATTTCTGGAAGGACAACACACTTCTACGCATGATGCCGCGTAAACGT
1491442	-	2396595	primary, antisense,	P:gene_id "G0-10592"; gene_name "rydC";,A:gene_id "EG10172"; gene_name "cybB";	CCGTATTCTTCGCCTGTACCACGGGTCGGTTTTAGTACAGGCGTTTTCTTTAAATATCCTT
1492144	+	1935.71	internal, antisense,	I:gene_id "G0-9611"; gene_name "sokB";,A:gene_id "G6736"; gene_name "mokB";	CGGGTAAGAGGCTAAGATCTGAATTGCTAGGTTCATTCGTTGGCCTCGGTTGATAGAAATA
1492156	-	161788	antisense,	A:gene_id "G0-9611"; gene_name "sokB";	ACTTTCTGTTTTCAGGCTAACCGGGAATCAGAAAGACGAAGGCCCCGACCGATATTTCTAT
1495034	-	80166.4	internal,	I:gene_id "G6737"; gene_name "ydcI";	TTTAACATCGCTTATGGAAAAAAATAGTCTGTTTAGTCAGCGCATCCGTTTGCGCCACCTT
1498877	+	1227.78	primary,	P:gene_id "EG12865"; gene_name "ydcH";	AGATGAGATGCTCAAAATCCTGCAGCAGGAGAGCGTCAAAGAGGTGTAAACTTTCCTAAGC
1504925	+	4102.8	antisense,	A:gene_id "G6744"; gene_name "ydcO";	GGATCCACGTCCTTCAGGGCGTGGAGGATGTCAATATCGGTTTCTGTCAGCGATTAAATTC
1512428	+	1556.64	internal,	I:gene_id "G6751"; gene_name "ydcS";	AAATGAGCGATTTCAAAAACGAGGGTGTGGTTGCTTCCAGTGCCTGGCCCTATCAGGCCAA
1517039	-	536300	antisense,	A:gene_id "G6755"; gene_name "patD";	TTTGCACGCAGCACGTACTGTCAGAGAAATCAGTGCTCTGACAGTACGCAAGATCATCTCA
1517918	+	1884.17	primary, antisense,	P:gene_id "G6757"; gene_name "ydcY";,A:gene_id "G6758"; gene_name "ydcZ";	GCACCATCCTCTGATTAAAATGAGCGTCTGGCTACCAACCAGGCGCCAACCACAAGTAAAA
1555765	-	535854	orphan		TCAGTCCTCAATGACGATTAAACACCATTGCCTGCGCAATGGTGTTTTTGTTTTTATCTGC
1555999	-	65832.7	orphan		CGGCAACCTAATTTAGGGGTTTAGCACGTGTTTCTTCGCTACGGCGATGTTGTCCTTAAAA
1557105	+	1578.96	primary, antisense,	P:gene_id "EG10680"; gene_name "osmC";,A:gene_id "G6777"; gene_name "ddpF";	AAAGCATTGCCGGATGACGCGTCAGGCGCGTGAATGCCTGATGCGTTGTTAGCATCTCTAC
1609037	-	47630.3	orphan		AGCGTCTTGAGAATGTGATCGTAATCACGTTTAATAGGGCGACTTTTCCACGCCTGAAGAT
1611820	-	62724.7	internal,	I:gene_id "G6808"; gene_name "dgcF";	TCTGGATTTCTGGCCTTTGCTTGCGGACTGGTTCAGTGAGCAATTCTCAACGGGCGTGTTG
1622824	-	2791345	internal,	I:gene_id "G0-10671"; gene_name "mgrR";	GCAAAACACAAATCTATCCATGCAAGCATTCACCGCCGGTTTACTGGCGGTTTTTTTTCGC
1632574	+	2150.35	orphan		CCAGCCAATCGCAGCACGTTCTTGCATAAGGTGTGTCTGCGGTTTTTCAACTATTCAGATA
1632744	+	2065.34	orphan		AATCCGTGTAGAGTCTCTACATAAGATAGTTTGCAGTTGCCGCTTCAGCTTGCGCCATAAA
1637558	-	176568	orphan		TGTATTCAATAATAAAATTTATCCATAAACCTCGTTTTTACGGGGTTTTGTTATATTTGAA
1638981	+	1290.47	antisense,	A:gene_id "G6826"; gene_name "ydfP";	TATCTTACCCTTAAGATTTCAGGAATTTTGGCTCATGGAAGAGTCCTTTTTATTTAAATTT
1641224	-	1233565	orphan		GTAGTGAATATTGGATCTCTTTAATAAAAAGTAAGGAGGTCCAATACATGAAACAATGGCT
1642188	-	87903.7	orphan		TGTCCCTAAACACAATGAGTCTGCTTATTATATTATTAGCAGAGCTATTACGGCCAAAGTA
1642356	-	55367.6	orphan		TACCCGACGTTAAGAAAAAGTAGAAAACCCGCTGATGAGCGGGTTTTGTGCTTTAAATGGG
1644572	-	47630.3	orphan		ACTCCCGCTGAGTAACACCGTGCCACCGGAGAAAACCGATGGCACGCAACGCAAAATATTA
1645081	-	48771.2	primary,	P:gene_id "EG11130"; gene_name "hokD";	ACCTGAGGAGTAAGAGACCCGGCGGGGGAGAAATCCCTCGCCACCTCTGATGTGGCAGGCA
1647051	-	485942	orphan		TTTCGGGTGGTTTGTTACTTGTTTTACCGGGGATATGCCAGAAACGCGCTGAGTCAGTCTG
1648368	+	2353.82	primary,	P:gene_id "EG10226"; gene_name "dicA";	CGTCAGCGGACAAATAAAAGATAACATCATCAATGAGTTATCTTTTACCACATCAATTATG
1649368	+	4413.59	orphan		CCGGGTTGTCAGGTTGACCATACGCTTAAGTGACAACCCCGCTGCAACGCCCTCTGTTATC
1669718	+	1024.31	internal,	I:gene_id "G6854"; gene_name "ynfM";	GATCTACAGGCATATTTAGCAAGGATTTCAAGTGAGCCGTACTACAACTGTTGATGGCGCT
1672076	+	4352.23	internal,	I:gene_id "G6856"; gene_name "ydgD";	AAACCAGACGTTGCCAGATCGGCAAACGATGAGGTCAGCACCCTGTTTTTTGGTCATGATG
1688170	-	40273.3	internal,	I:gene_id "EG10356"; gene_name "fumA";	AGGCGTTTCATGATGCGTCGTTCATGCTGCGTCCGGCGCACCAACAACAGGTGGCCGACAT
1697224	-	40653.7	primary,	P:gene_id "EG10425"; gene_name "hdhA";	AATACACTAACGGACCGGTAAACAACCGTGCGTGTTGTTTACCGGGATAAACTCATCAACG
1704702	+	1114.89	primary,	P:gene_id "G0-9561"; gene_name "blr";	GAGTGCTTCGGTACAACACAAGTAAGCTCTGCACTTGTGGAGCGACATGCTGCCCGTCCGG
1720343	-	63485.2	primary, antisense,	P:gene_id "G6882"; gene_name "slyA";,A:gene_id "G6881"; gene_name "slyB";	GTGAAATGAAGGGGGCGTGTGGTCAGTAACCTGACCACACGCAAACTTATTTAGCGCGGAG
1720384	+	1952.44	primary, antisense,	P:gene_id "G6881"; gene_name "slyB";,A:gene_id "G6882"; gene_name "slyA";	TCCGCGCTAAATAAGTTTGCGTGTGGTCAGGTTACTGACCACACGCCCCCTTCATTTCACC
1728279	+	1052.19	primary,	P:gene_id "G6891"; gene_name "gloA";	CGGTCTGGGCAACTAATCTCCTGCCGGGCGTGAACTCATCGCGCCCGCATCTTTACTGCAT
1733706	-	274110	primary, antisense,	P:gene_id "EG12181"; gene_name "grxD";,A:gene_id "EG11548"; gene_name "lhr";	TAATCCGTCCTGCAATACTGACGGATGCGAACGGGCATCCGTCAGTCCTTTCTCTATCCCC
1736114	+	8131.74	antisense,	A:gene_id "G6893"; gene_name "ydhP";	ATCGCACGTTGTCAGCAACTGTAACGCAGAAGGTTATCCTTCTGCGTTTTTGTTTAATTAG
1737422	-	662064	primary,	P:gene_id "G0-10594"; gene_name "ynhF";	CTGCCGCGCTGCACTGATTTCCTCTCGAGGGAGCGCGTTCTCCCTCGCATCTCCTTCCTGT
1737776	+	1318.37	orphan		CGCTCCGTGTCGTTTTTCCGGCGTACCGCAACACTTTTGTTGTGCGTAAGGTGTGTAAAGG
1737952	+	1493.95	internal,	I:gene_id "EG10800"; gene_name "purR";	ACGTGATCAACAAAACACGTTTCGTCGCTGAAGAAACGCGCAACGCCGTGTGGGCAGCGAT
1741259	+	17180.5	orphan		AAAGCTACGATAAATATTATGTTTTTACGGGGACAGGATCGTTCCCGACTCACTATGGATA
1741530	+	1782.44	internal,	I:gene_id "EG11531"; gene_name "cfa";	TACTTAGCCGTGCCGGTATAGCCATTAACGGTTCTGCCCCGGCGGATATTCGTGTGAAAAA
1742568	-	55747.9	primary, antisense,	P:gene_id "EG11406"; gene_name "ribC";,A:gene_id "EG11531"; gene_name "cfa";	CCAGGCACAGAAGCCTGATCTGAAATCGCCCCCGGAGAGGGGGCGATAGAATAGCCTTTAG
1746511	+	11112750	primary,	P:gene_id "EG30111"; gene_name "valV";	ACCACCTTGACATGGTGGGGGTCGTTGGTTCGAGTCCAATTGAACGCACCATCCTGCGTCC
1746701	+	1845.12	internal,	I:gene_id "G6895"; gene_name "ydhR";	TTAAAAGATTTACACTGTCTTCGTATGCGTTATCAGAAGGAGAATCGCTATGGCAACTTTG
1747040	+	9999.17	primary,	P:gene_id "G6895"; gene_name "ydhR";	GGCAAAACTCGCCTGACAGAATTTAATCAAGGGCGGTTAGCGCCCTTTTCATCCCTGTCTG
1754894	-	143652	primary,	P:gene_id "G6903"; gene_name "ydhZ";	ACTGGTAAAATGACCATTCAGGATGAGGCGGTAAGCTTCATCCTGATATTCTTGCTTCAGT
1757701	+	82465.5	primary, antisense,	P:gene_id "EG10544"; gene_name "lpp";,A:gene_id "G6904"; gene_name "ldtE";	CAAGTAATAGTACCTGTGAAGTGAAAAATGGCGCACATTGTGCGCCATTTTTTTTGTCTGC
1764708	-	4136120	primary,	P:gene_id "G0-8876"; gene_name "rydB";	GAGCTAAGCCACTGAGAGTGCCGGAGATAAGCGCCGGATGGGGTAGAAACCCTTAAGCCTG
1791935	-	43761.7	internal,	I:gene_id "G6925"; gene_name "ydiV";	TTGCTATTTCCTGCCGATAAGAGACAACCAGCAAGTCCTTGTCGGCGTTGAGTTAATTACC
1795097	-	44522.3	internal,	I:gene_id "EG10127"; gene_name "btuC";	GACACTTGCCCGCCAACAACAGCGACAAAATATTCGCTGGTTATTATGCCTGTCAGTTTTG
1795272	-	44142	internal,	I:gene_id "EG10440"; gene_name "ihfA";	CGTGGTGACCTTCAGACCCGGGCAGAAGTTAAAAAGCCGGGTCGAAAACGCTTCGCCCAAA
1795548	-	50738.4	primary, internal,	P:gene_id "EG10710"; gene_name "pheT";,I:gene_id "EG10440"; gene_name "ihfA";	GAGGCATTAAAAGAGCGATTCCAGGCATCATTGAGGGATTGAACCTATGGCGCTTACAAAA
1799194	-	130524	primary,	P:gene_id "EG11272"; gene_name "pheM";	TTTTTACTTTAGCACCTGAATCCAGGAGGCTAGCGCGTGAGAAGAGAAACGGAAAACAGCG
1799356	-	387194	primary,	P:gene_id "EG10881"; gene_name "rplT";	CAGCTCTGGCATAAGCCAGTTGAAAGAGGGAGCTAGTCTCCCTCTTTTCGTTTCAACGCCA
1800044	-	321741	orphan		GCCTTCAAGTAGCACTGTCTGTGGAGCCTTCGGGCTTCACAGGCTTTGTTCGCCTTTGTTT
1800228	-	66973.5	internal,	I:gene_id "EG10506"; gene_name "infC";	GGTGATAAAGCCAAAATCACGCTGCGTTTCCGCGGTCGTGAGATGGCGCACCAGCAAATCG
1801187	-	44902.5	internal,	I:gene_id "EG11001"; gene_name "thrS";	TGGAAGAAAACAACATCCCGTTTGAATATCAACTGGGTGAAGGCGCTTTCTACGGTCCGAA
1801304	-	44142	internal,	I:gene_id "EG11001"; gene_name "thrS";	ATATGTACAGCACTTTTGGCTTCGAGAAGATCGTCGTCAAACTCTCCACTCGTCCTGAAAA
1801661	-	84415.4	internal,	I:gene_id "EG11001"; gene_name "thrS";	AGTACCAGTATCAGGAAGTTAAAGGTCCGTTCATGATGGACCGTGTCCTGTGGGAAAAAAC
1802523	-	59616.5	internal,	I:gene_id "EG11001"; gene_name "thrS";	AAAATGCCTGTTATAACTCTTCCTGATGGCAGCCAACGCCATTACGATCACGCTGTAAGCC
1802649	-	55367.6	orphan		TTTGTGTACCTGATTGCGAACCAATTTAGCATTTGTTGGCTAGATGGTTTCGCAATGAACT
1809229	-	42174.7	internal,	I:gene_id "G6931"; gene_name "yniB";	TACAGGTAAACTAAGTGAAACGACGCGTCTTAATCAAGGAGAACTCATGACGTATCAACAA
1816378	+	1035.46	antisense,	A:gene_id "EG12198"; gene_name "chbG";	TTTGTAGGAATTAATCGCCGGATGCAAGGTTCACGCCGCATCTGGCAAACATCCTCACTTA
1821865	-	141370	orphan		AATTCGTCTGAAAGCTTGAGTAACAACGGAAACCGGCCATTGCGCCGGTTTTTTTTGGCCT
1822109	-	75917.6	internal,	I:gene_id "EG10044"; gene_name "osmE";	AGCCTGTGGTGAAAGACGTCAAAAAAGGCATGAGCCGGGCGCAGGTTGCACAAATTGCGGG
1822259	-	70081.6	orphan		CGCCCAATGTATTCCAGGCTTATCTAACACGCTGATAAACAAGAGGACGGAATATGAACAA
1825060	-	449918	orphan		GTCTTGTCCACTACCTTGCAGTAATGCGGTGGACAGGATCGGCGGTTTTCTTTTCTCTTCT
1861655	-	96401.6	primary,	P:gene_id "G6964"; gene_name "yeaC";	GTAAGTGGTTCATCCCCTTTTTGCCTCGGCTATGAAGGGGATAGCCAACAATGACCCCACG
1862742	+	2631.16	orphan		GATTCCGCTTGACGCTGCGTAAGGTTTTTGTAATTTTACAGGCAACCTTTTATTCACTAAC
1864735	-	150248	primary, antisense,	P:gene_id "G6967"; gene_name "yeaE";,A:gene_id "G6966"; gene_name "yeaD";	GTGATGTTGTGTGCCGGATGCATTGCACCCGGCACACAACATTAACGTAAATTAACGTTTC
1868879	+	1211.05	primary,	P:gene_id "G6969"; gene_name "yeaG";	GTAAATCGTCTTAACAACCCTGGCCCGGTACACATGTTACCGGGCCTACAACGACAGCGAA
1878964	-	536680	primary, antisense,	P:gene_id "G6981"; gene_name "yeaQ";,A:gene_id "G0-10648"; gene_name "yoaJ";	AAAGTTAACGCTTAAATTGCACAAAGGCTGCACACAGGCAGCCTTTGCTATTTTTTAGAGG
1888020	-	44142	primary, internal,	P:gene_id "EG11530"; gene_name "fadD";,I:gene_id "G0-9384"; gene_name "sroD";	TAAAGCCTGAGCGTTAAGTCAGTCGTCAGACGCCGGTTAATCCGGCGTTTTTTTTGACGCC
1893787	+	1584.54	orphan		ACGATAATTTATCGATAATACTGGTCGGTTTTACATAAATCGACCAGAGAATAAGATATTA
1894498	+	7894.79	orphan		GCATAAATGGGTCAGGACGCTTTTAATCACATATAAAAAGCGTCCTTTTTCTCACAATCAA
1896275	+	4283.96	internal,	I:gene_id "EG12693"; gene_name "nudL";	GCCCGCAAATTAACCGGGAAACCCTAAATCATCGTCAGGCTGCTGTGTTAATCCCCATCGT
1896867	+	1963.61	orphan		TTTTGATTAGTTTAATTCATGTGAATAGTTAAGCCAGTCGCCGCGTTCCCTCTTACACTAT
1904785	+	1477.22	primary,	P:gene_id "EG10569"; gene_name "manZ";	CTGGGACTGTAAGACTGTTGTACACTACCGGGGCCTTTTGGCCCCGTTTTTTTATCTGGAG
1907153	-	3055420	orphan		TGAATACGCTTCAATCTCGCTATAAAGCCTCGTCGAATGCGAGGCTTTTTACTATGCTTTA
1907716	-	264852	orphan		GGCAAGGTTAAGCACAATGATATATCGGCGCGTATTCCGTTGCATAAGTGTGCAAAAAAAG
1908212	-	46489.6	primary,	P:gene_id "G7001"; gene_name "yebO";	AATCCTTCCTCAATCTTGAGTAACCCCGTCGTTGAAGGGTTACTCAATTCATCCTGATTAT
1915441	-	66213	internal,	I:gene_id "EG12866"; gene_name "proQ";	CGTTTCTGGCCGAACGTTTTCCCCACTGTTTCAGTGCGGAAGGTGAAGCGCGTCCGCTGAA
1915559	-	41033.9	orphan		ACTGATAGCGTCATTATAATGACGCCTGTTCATGCCTGCGCTTGTTGGCTACGTCCGTTGT
1917459	+	1035.46	internal,	I:gene_id "G7006"; gene_name "yebS";	CGCTTTTACTATGGGACCGGCTGCGTTTTATTTCGGCGCAGCGGTAATTTTGACTATTCTT
1922050	+	7430.72	primary,	P:gene_id "G7009"; gene_name "yebV";	TTATGCGTCTTGCCTGATCCAAAAAGAACCCGTCGGCATGGCGGGTTATTTGTCCTGGTTA
1923104	-	2425660	primary, antisense,	P:gene_id "G0-8883"; gene_name "sdsR";,A:gene_id "G0-8865"; gene_name "ryeA";	CAAGAGCCATTTCCCTGGACCGAATACAGGAATCGTGTTCGGTCTCTTTTTATCTGTTAAA
1923121	+	5297.11	internal, antisense,	I:gene_id "G0-8865"; gene_name "ryeA";,A:gene_id "G0-8883"; gene_name "sdsR";	CAGCGAAGGAAATGCTTCTGGCTTTTAACAGATAAAAAGAGACCGAACACGATTCCTGTAT
1929972	-	84035.1	orphan		AATTCGATTGACTGTTGGCGGATGCGGCGCGAGTGCCTTGTCCGCCCCAGAACGCACCACA
1941995	-	47250.1	internal,	I:gene_id "G7017"; gene_name "znuA";	TTGAGGCACAATTAGCCTCAACCGAAACGCAGGTTGGTAACGAGCTCGCGCCGCTCAAGGG
1952379	+	1205.47	internal,	I:gene_id "G7019"; gene_name "yecN";	GTTCGCCTGCGAATGCAGTACCGCGTTGCCTATGGCGACGGCGGTTTTAGCGAACTGCAAA
1982209	-	54987.4	internal,	I:gene_id "EG11752"; gene_name "otsB";	AGGACTACAGCTACTGGCAACCGCAAGTGATGGTGCATTGGCATTGATATCAGGGCGCTCA
1985131	+	1137.2	antisense,	A:gene_id "EG10057"; gene_name "araF";	GAATCACTGGTCGTTCACACCCCCTCTGCATCATGCAGAGGGGAATTTTTCCGGCAAATTA
1987963	-	55367.6	internal,	I:gene_id "G0-8904"; gene_name "isrB";	TATTATAAGCGCAAAGACAATAACACCTGTATAACAAATGGTCGGAGTGCCGCGATGAAAC
1989219	-	95640.8	primary, antisense,	P:gene_id "G7036"; gene_name "yecH";,A:gene_id "EG10921"; gene_name "ftnA";	TAAGATTTGCCGTCACTGATTTGAAACGGCGGCAGTAAACCTGCCGCCGGAGAGCATTAGT
1989247	+	1963.61	primary, antisense,	P:gene_id "EG10921"; gene_name "ftnA";,A:gene_id "G7036"; gene_name "yecH";	TCGACACACAAAACTAATGCTCTCCGGCGGCAGGTTTACTGCCGCCGTTTCAAATCAGTGA
1991914	-	1593355000	primary,	P:gene_id "G7991"; gene_name "cysT";	TAGCGGATTGCAAATCCGTCTAGTCCGGTTCGACTCCGGAACGCGCCTCCACTTTCTTCCC
2024594	-	160713	primary, antisense,	P:gene_id "G7045"; gene_name "dsrB";,A:gene_id "EG10820"; gene_name "rcsA";	AGCAGAGTAATCTTATTCAGCCTGACTGGTGGGAAACCACCAGTCAGAATGTGTTAGCGCA
2025229	-	887088	internal, antisense,	I:gene_id "G7047"; gene_name "dsrA";,A:gene_id "G7046"; gene_name "yodD";	AAGTGCTTCTTGCTTAAGCAAGTTTCATCCCGACCCCCTCAGGGTCGGGATTTTTTTATTG
2025257	+	11227	primary, antisense,	P:gene_id "G7046"; gene_name "yodD";,A:gene_id "G7047"; gene_name "dsrA";	TCGTTGAATGCACAATAAAAAAATCCCGACCCTGAGGGGGTCGGGATGAAACTTGCTTAAG
2043181	+	2240.93	orphan		AATTATGGACTTTGTCCCGCGGCTTTAATCTGACGGCCGCGTTCCTTTTTTGACTCAATTA
2043468	-	66471850	primary,	P:gene_id "EG30094"; gene_name "serU";	ACCGGAGTAGGGGCAACTCTACCGGGGGTTCAAATCCCCCTCTCTCCGCCACTTTATCAAT
2044735	+	1963.61	orphan		AACGGATAGCGGGTTTTTAACATCTTAAGCGCCCTCGACCTTTATGGTTGAGGGCGTTTTG
2058025	-	394170	primary,	P:gene_id "G7069"; gene_name "asnW";	CGGACTGTTAATCCGTATGTCACTGGTTCGAGTCCAGTCAGAGGAGCCAAATTTTAGTTTT
2059967	+	4799.56	primary, antisense,	P:gene_id "EG30021"; gene_name "asnU";,A:gene_id "G7071"; gene_name "cbl";	AGAGGAGCCAAATTCCTGAAAAGCCCGCTTTTATAGCGGGATTTTTGCTATATCTGATAAT
2063302	-	40653.7	internal,	I:gene_id "G7073"; gene_name "ldtA";	TAGCTTTCGCGACATAGGAAAGGGACATGATGCGTCGTGTAAATATTCTTTGCTCATTTGC
2067813	-	41033.9	orphan		TGATCCTGAGCAACTTCGTATTTGGGCCATTACCATGGAGTAGAAAGCTGTGTCTGAGAAT
2068394	-	280326	orphan		CGGTCTCTGGTTGTATCCACGGACCGCACTCTTGACATAAGAGTGCGGTCCGTGGAAAACG
2078989	-	66213	primary,	P:gene_id "G7087"; gene_name "yeeX";	CGAAGTAATTCCCGTTTTATTCAATGAGGGTTGCCCGGCAACCCTCATTGCTCATTGATTC
2084186	-	103758	primary, antisense,	P:gene_id "EG11894"; gene_name "yeeD";,A:gene_id "EG10926"; gene_name "sbcB";	AAAAAGCCTGACTCAACATTGTCCTCCGCCGTACCAGCGGCGGAGGCTTCAAATTAGACAA
2088326	-	72809.4	internal,	I:gene_id "G7089"; gene_name "yeeZ";	TGGCAGTCGGATTTGTAATGAACTGGGATTTGAATACCAGTATCCCGATCCGCTGGTAATG
2090132	+	12924.4	orphan		CTTCCAGTGGTGCATGAACGCATGAGAAAGCCCCCGGAAGATCACCTTCCGGGGGCTTTTT
2098243	-	98749.1	internal,	I:gene_id "G7090"; gene_name "wzzB";	AGAAAATAATAATGTTTCTGGGCAAAACCATGACCCGGAACAGATTGATTTGATTGATTTA
2113181	-	43761.7	orphan		GAATTTTTCGGGTTTAGCGCGAGTGGGTAACGCTCGTCACATCATAGGCATGCATGCAGTG
2113346	-	47630.3	orphan		TATAACGGCAGTGAAAATTCGCAGCAAAAGTAATTTGTTGCGAATCTTCCTGCCGTTGTTT
2139607	+	2875.01	orphan		CGGGAGCCCGGGTTGCCAGGGTGGTGGAGATTGAGCCACCCTGGCACGTTCACCGGCTTGA
2143342	+	1578.96	internal,	I:gene_id "EG12396"; gene_name "dgcE";	AATTGCCCTGCCCCACCCGCTGCTTCACCTGGTCAGTTTAGGTTTAGTCTCGTTTATCTTT
2153420	+	254683	internal, antisense,	I:gene_id "G0-8884"; gene_name "sibA";,A:gene_id "G0-10633"; gene_name "ibsA";	CACTAAGAGTATCACCAGTATGATGACGTGCTTCATCATAACCCTTTCCTTATTAAAAGCC
2153749	+	491701	internal, antisense,	I:gene_id "G0-8885"; gene_name "sibB";,A:gene_id "G0-10632"; gene_name "ibsB";	TATGACTAAGAGCACCACGATGATGAGTAGCTTCATCATGACCCTTTCCTTATTTATGGCC
2153897	+	1216.63	orphan		CGCGTAGATAAAATAGTTTCCTGTGTTATTACTGGATGCGTGCTCGCAAATGTGCCCGTCA
2165559	+	1199.89	primary,	P:gene_id "G7117"; gene_name "yegP";	AGACAATACGTAATTACGATGCCGGGCGTGGGTTGTTGGCGTCCGGCGCTTTACCAGAGCC
2167199	+	325335	internal,	I:gene_id "G0-8878"; gene_name "cyaR";	CAGGAACCACCTCCTTAGCCTGTGTAATCTCCCTTACACGGGCTTATTTTTTACGCGTAAT
2171800	-	252106	primary,	P:gene_id "EG12417"; gene_name "gatD";	GTGTTGCTCATTCCCTGAAACCGCGGGCCAGCGTGATGCTGGCCCGGTATTGTGCAAAACA
2172887	-	236946	primary,	P:gene_id "EG12416"; gene_name "gatC";	TCGTTCTCGCAGAATAATTTTTACCTGAGGGGGAGGTTATCCCCCTTAACAATCAGGAGTT
2176259	-	46869.8	internal,	I:gene_id "G7128"; gene_name "gatZ";	ATTGCCCGGCATAAAGCTGGTGAACATATCGGCATATGTTCAGTCTGTTCTGCCCATCCGT
2176438	-	40653.7	internal,	I:gene_id "EG12419"; gene_name "gatY";	CTCGCAGGCGTTAAAAAATTACCTGACCGAGCACCCTGAAGCGACCGATCCCCGGGATTAT
2177079	-	113463	internal,	I:gene_id "EG12419"; gene_name "gatY";	CACAATCTCGAAACGATGCAAGTGGTGGTAGAAACCGCTGCCAACCTGCATGCGCCGGTCA
2185342	-	202888	orphan		ATACCCGTATCACCTGATCTGGATAATGCCAGCGTAGGGAAGTCACGGACCACCAGGTCAT
2192460	-	190522	orphan		GCAACCTGATTTTAATTGCATTTAGAAAGCCGAAATCATTTATATAAATGATTTCGGCTTT
2204485	+	1041.04	orphan		AGGCCTGAAAATAGTAAATAAAAGAACCTGCCTCACCAGCAGGTTTTTTTATTTACTGTGA
2214904	+	1301.63	internal,	I:gene_id "EG12008"; gene_name "mlrA";	AAGGGTGAGACGATGGCGCTTTACACAATTGGTGAAGTGGCGTTGCTTTGTGATATTAATC
2215813	+	1114.89	primary, antisense,	P:gene_id "G0-10459"; gene_name "yohO";,A:gene_id "EG12009"; gene_name "yehW";	AAGCGCCTGCACCAGCCTTTCAAACAGGCGGTCTGCGATGATCGCCGCCAGTGCCACCAGT
2223987	+	1131.62	antisense,	A:gene_id "EG12015"; gene_name "pbpG";	CTTAATCGTTCTGTGCCGTCTGCCCCGCCGCCGCCATTTGGGCGGCTTTTTGTTTTTTATA
2239314	-	77438.6	primary,	P:gene_id "EG10593"; gene_name "mglB";	TTCAGCAAGAAATAAGACTGATTGGGCGCAGTCTATTACTGCGCCCTTATTGTATGGCCAA
2263539	-	431335	orphan		GTTTCAGCGCGATCTTGTCTTTAACCCTAAGCCAGGTTGGCGCTTTTTTTCTCATAGAGGC
2265250	-	52259.6	internal,	I:gene_id "G0-10511"; gene_name "yeiW";	AACGTATGGAATGCCGTCCGGGTTGCGGGGCGTGTTGCACTGCCCCTTCAATTTCCAGCCC
2269973	+	3100.8	orphan		TGGCATTTTTTTATAACGATATTTGTCGTTAAGGACTTCAAGGGAAAACAAACAACATGGT
2270136	+	12902.1	internal,	I:gene_id "G7147"; gene_name "mepS";	GCATCCTGAGACACGTGCAGTGGGTAGTGAAACATCATCACTGCAAGCTTCTCAGGATGAA
2270620	+	2784.43	orphan		GGCTATCCTGACGAGTTAACTGAAAGCACTGCTTAGGCAGTGCTTTTTTGTTTTCATTCAT
2277685	-	168450	antisense,	A:gene_id "EG12041"; gene_name "yejF";	TAGGCCAGTTGATGCTTTTGTTGCAATGATTTCAATAGCGTCAATATTTGCGCCTGTACCG
2278567	+	3146.76	antisense,	A:gene_id "EG11419"; gene_name "bcr";	GGTTGACATGCATCAACAAAGGAAGCCTTTTAGCTTCCTCGTTGTGCAATAGATCACCGTT
2280434	-	69321.1	internal,	I:gene_id "EG12044"; gene_name "rsuA";	CATGCGACTTGATAAATTTATCGCACAGCAACTCGGCGTTAGCCGTGCTATTGCCGGGCGT
2286287	+	3221435	primary,	P:gene_id "EG30067"; gene_name "proL";	ACCGTCATGGGGTGTCGGGGGTCGGAGGTTCAAATCCTCTCGTGCCGACCAAAAATCCCAA
2291359	+	9632.62	antisense,	A:gene_id "EG12052"; gene_name "ccmH";	CGCACTTTGTCAACAGTCTAGCCCGATGGCATCACCATCGGGCCTCTTTTTATTTACTCTC
2311605	-	273036	primary,	P:gene_id "EG10670"; gene_name "ompC";	CCAGTTCTAATCTCGATTGATATCGAACAAAGGGCCTGCGGGCCCTTTTTTCATTGTTTTC
2312669	-	40273.3	internal,	I:gene_id "EG10670"; gene_name "ompC";	CCAGCTCTGCTGGTAGCAGGCGCAGCAAACGCTGCTGAAGTTTACAACAAAGACGGCAACA
2313170	+	3610.83	internal,	I:gene_id "EG30063"; gene_name "micF";	TTTCTGAATGTCTGTTTACCCCTATTTCAACCGGATGCCTCGCATTCGGTTTTTTTTACCC
2316036	+	1307.21	internal,	I:gene_id "EG12385"; gene_name "rcsD";	CTTTGCTGCGTTAGCCCAAACGGCTCATCGTCTTAAAGGCGTATTTGCCATGCTAAATCTG
2333993	+	3061.76	orphan		GCCGTGACTGAGAAGAGAAAGTACGCTGCATCACGCGGCGAGATTTGCCGTACCAGTTATC
2365011	+	1612.43	primary, antisense,	P:gene_id "G7164"; gene_name "nudI";,A:gene_id "G7165"; gene_name "ais";	TTTGAAAGGTCTTCTGTAACAATGATGACAGCCATTACTGGCTGTCAGATTGAAAATTTAG
2380674	-	221851	primary,	P:gene_id "G7173"; gene_name "elaB";	TAAAACCTCCCTACACCGGGGTACTGCATTTTTTTTGTAGTACCCCGTATAATGTGAGGCT
2391429	-	84415.4	internal,	I:gene_id "EG12093"; gene_name "nuoN";	CGCACTGCTACCGTTGCTGATCGTCGGCTTGACGGTGGTGGTTGTGATGCTCTCCATTGCG
2405082	-	475924	orphan		ATGTGGCGTCCATCTGCCGTGAAGAGCAGTGAATCTGGCGCTACTTTTGATGAGTAAGCAA
2405672	-	46869.8	primary,	P:gene_id "EG12123"; gene_name "lrhA";	TTGAAAGGGATATCGAGTAATCGACGGACGATAGATAATTCCTGAGACAATAGTGTAAAAA
2406933	-	78198.9	orphan		GCCTCACCATTGCTGTTGGTACGTGTTCGCGTATGACCAGCGATGCTGCACGAGAGTGGAA
2422637	+	1590.12	primary, antisense,	P:gene_id "G7196"; gene_name "yfcH";,A:gene_id "G7197"; gene_name "yfcI";	GATGTCGTTCGCTGATGTGGTTTACAGCAAACATCCGCCAGTTAACTCCCGGTGTTACAGG
2427825	-	961041	orphan		TGGCATAAGACCTGCATGAAAGAGCCTGCAAACACACAACACAATACACAACATAAAAAAG
2441428	-	50358.2	internal,	I:gene_id "EG10274"; gene_name "fabB";	GCATGCGTAGCCACGTCTGGGGCAACGTAAAACTGGATACCACTGGCCTCATTGACCGCAA
2447537	-	40653.7	internal,	I:gene_id "EG12449"; gene_name "prmB";	ACGGCGGCGATGGTGTGTTTATGCTCACCAAAGAGCAGCTTATTGCCGCACGAGAACATTT
2456833	-	39893.1	orphan		GGCCACCGTTTTCTTTCTCTGGTTTCAGATGAAAGAAAACGGGCGAATCTGGTTAACAAAA
2461244	+	1516.27	orphan		ATACTCTCGCCACTGGTCTGATTTCTAAGATGTACCTCAGACCCTACACTTCGCGCTCCTG
2465051	-	50738.4	orphan		CTGTTACAATCGCCCACACCTAAACAGGCGGATACGGTATCGTTCCGTCATGGATGGCAAA
2466383	+	4178745	primary,	P:gene_id "EG30016"; gene_name "argW";	CGAGCCCCTCCTAAGGGCTAATTGCAGGTTCGATTCCTGCAGGGGACACCATTTATCAGTT
2470466	-	196738	primary, antisense,	P:gene_id "G0-16635"; gene_name "ryeG";,A:gene_id "G7221"; gene_name "yfdI";	AAATTAGGTTGGTATTATAGCTTGTGCGCGCCATGATTGGCGCGCAATTTAAACTTAGTGC
2470496	+	1284.9	primary, antisense,	P:gene_id "G7221"; gene_name "yfdI";,A:gene_id "G0-16635"; gene_name "ryeG";	GCGATGTAAAGCACTAAGTTTAAATTGCGCGCCAATCATGGCGCGCACAAGCTATAATACC
2476598	+	1856.29	orphan		CATTCCAATCAATCCCCTGCTGCTTCAAGTAGATGTCTGCAGGGGACACCATCCTTGTGTT
2483701	+	12744.5	orphan		AGGAAGCTCAGATTTTCTTATTTTTATTGAGAAAATGAGATGACGCCTTATGTCTGTATTA
2484500	+	2257.66	internal,	I:gene_id "EG11610"; gene_name "evgS";	TCGAATATCGTGGCATCAGTAGTAACAACCGTGTCACACTTGATCCACTACGTCTGAGCAA
2498307	-	39893.1	orphan		CAGCCACCATCGTGGCAGCGTCGCTCGGACGGTCCGGGCGCTAACGTTAATCTGAGGAAAT
2498710	+	2150.35	internal,	I:gene_id "G7243"; gene_name "ypdA";	CAGAGTCACCCGTGCACGAAATATTCAACATGCTGCTGGCGGTCTTCGATCGGGCAGCGTT
2512788	-	103378	orphan		GTCATCAATCTTTTCGTAGTCATAATCCTGGTCTATCAGAGAAATCACCACAATCCATTTA
2518156	-	1185685	primary,	P:gene_id "EG30011"; gene_name "alaW";	GCTTGCATGGCATGCAAGAGGTCAGCGGTTCGATCCCGCTTAGCTCCACCAAATTTTGCAC
2518595	+	2043.03	internal,	I:gene_id "EG11431"; gene_name "yfeC";	ACAACGTCACCAAAACCTGGCGTCCAGGGTGGCAAAGCCCGACTGGTTCACGTCAATGAAC
2521009	+	754442	primary,	P:gene_id "EG30110"; gene_name "valU";	TCCCTTACAAGGAGGGGGTCGGCGGTTCGATCCCGTCATCACCCACCAACTACTTTATGTA
2530241	-	54987.4	primary,	P:gene_id "G7258"; gene_name "zipA";	GAGTACCAGGACATCATCCGCGAAGTCAAAGACGCCAACGCCTGATACACTTAAGGCAAAT
2531130	-	201367	internal,	I:gene_id "G7258"; gene_name "zipA";	CGCTTTACTGGTACATGGTTTCTGGACCAGCCGTAAAGAACGATCTTCTATGTTCCGCGAT
2533669	+	3242.92	orphan		GGTCAACACCCGCCAGCAATGGACTGTATTGCGCTCTTCGTGCGTCGCGTCTGTTAAAAAC
2534344	+	2790.01	internal,	I:gene_id "EG10789"; gene_name "ptsI";	ATTATGCTGCTCGAAGATGAGGAGCTGGAGCAGGAAATCATAGCCCTGATTAAAGATAAGC
2535669	+	1109.31	internal,	I:gene_id "EG10789"; gene_name "ptsI";	GGGTCTGGACGAATTCTCTATGAGCGCCATTTCTATCCCGCGCATTAAGAAGATTATCCGT
2535958	+	2128.03	internal,	I:gene_id "EG10165"; gene_name "crr";	TCCGCTCTCTGGCGAGATCGTCAATATCGAAGACGTGCCGGATGTCGTTTTTGCGGAAAAA
2550561	-	41033.9	orphan		AAAACACGTAAAATAGCGCTCAACAATGCCACGGATTGCGTGGCATTATTATTTTCAGGAG
2557370	+	15926.1	antisense,	A:gene_id "EG50006"; gene_name "eutB";	AGAAGAACAGTGACGGATCGCCCGCCCGTTTGGTCAGGCGACCGTTTGCCATAATGCCCAT
2560309	-	94119.7	antisense,	A:gene_id "G7273"; gene_name "yffL";	CTTTAGCTTGTTTCTCATACCGCCCCCGGCATGTTGCAGCATTCCGGGGGCTTTTATTTGT
2590726	-	59616.5	antisense,	A:gene_id "EG10014"; gene_name "acrD";	CCGCTGAGCAGGTTCTTAATCGGAAAGTTGAAAAAGGCGACACATTGGCATGTCGCCTTTT
2599738	-	97542.4	internal,	I:gene_id "EG10205"; gene_name "dapA";	AGACACTTGTTTGCACAGAGGATGGCCCATGTTCACGGGAAGTATTGTCGCGATTGTTACT
2600994	+	1878.6	primary,	P:gene_id "EG10108"; gene_name "bcp";	CCTGATTACTTTGCTCCATTCCGTGCTGGCTGCGCTTGCGGCCAGCATACCTCACTTCTCG
2629573	+	5772.34	orphan		CTGTCGGATGCTTTTGCTGTTTGGGATTATCAAAGCGGCAGATATTCTTTCATCTTAAATT
2632596	-	55747.9	primary,	P:gene_id "EG10421"; gene_name "guaB";	GACCATTACTAAAGAGTCCCCGAACTACCGTCTGGGCTCCTGATTCTCTTCGCCCGACTTC
2634289	+	1584.54	internal,	I:gene_id "EG11072"; gene_name "xseA";	CTTCTCAATCCCCTGCAATTTTTACCGTTAGTCGCCTGAATCAAACGGTTCGTCTGCTGCT
2637422	-	44142	orphan		CGTCTCTGTCGTTCACTTTGAAAACGGCTCCTGGACAGGGGCCGTTTTCCTGTTTTTAACA
2640283	-	224198	internal,	I:gene_id "EG10453"; gene_name "hisS";	CCCTGAAGGGACGGCGGGCTGTGTACGCGCCGGCATCGAGCATGGTCTTCTGTACAATCAG
2642824	-	77818.9	internal,	I:gene_id "EG10015"; gene_name "rodZ";	TCAATTCTCATTTAAACGTACCTGCAGCGAATGAATACTGAAGCCACGCACGACCAAAATG
2653679	-	48010.7	antisense,	A:gene_id "G0-8908"; gene_name "IS128";	CCGCGAACCGGACCAGCAACAAAAAACCGCCTGATTTTGGCGGTTTTTTGTTTTTTAAAGG
2654157	+	3921.63	internal, antisense,	I:gene_id "G0-8879"; gene_name "ryfA";,A:gene_id "EG11601"; gene_name "sseB";	ACCTTCAGAGCAGCAAGTAAGCCCGAATGCCGCCCTTTGGGCGGCATATTTTAGATTATCC
2663263	-	260603	internal,	I:gene_id "G7327"; gene_name "trmJ";	ATATTCGAATTGTGCTGGTGGAGACGTCACACACCGGCAATATGGGTTCTGTTGCCCGTGC
2663713	+	1211.05	internal,	I:gene_id "EG10983"; gene_name "suhB";	TACTGATCAGGATGTTCAATGGGTTATCGATCCACTGGATGGCACTACCAACTTTATCAAA
2666762	+	1663.96	primary, antisense,	P:gene_id "G7329"; gene_name "csiE";,A:gene_id "G7330"; gene_name "hcaT";	ATGAGGGAACAACTTTCGGGCGCAAAAACATTGCCGGAAGCGCCACCAGCGCCATTACCCA
2684071	-	85175.6	antisense,	A:gene_id "G7344"; gene_name "yphH";	CAGGCAATTTTTCGTTTATGATCATCAAGGCTTCCTTCGGGAAGCCTTTCTACGTTATCGC
2687026	-	175428	primary, antisense,	P:gene_id "EG10384"; gene_name "glnB";,A:gene_id "EG10456"; gene_name "hmp";	AATTTAAACCGCGTCAAGGGTTGCCGGATGTTTCCATCCGGCAACATCAAATTACAGCACC
2687089	+	1307.21	antisense,	A:gene_id "EG10384"; gene_name "glnB";	GATGGAAACATCCGGCAACCCTTGACGCGGTTTAAATTGCCGCGTCGTCCTCTTCACCGGT
2691192	-	6031995	internal,	I:gene_id "G0-8910"; gene_name "glmY";	AGCGTAGCTATATCAACCATCGGGCGAAACGTCGAGTTAGGCACCGCCTTATTCCATAACA
2700059	-	66213	orphan		AAACGTACTTAAGGTGCGTCCGGTGAACCAGTCGGACGCACCTTTAATAACTATAAATAAG
2703808	-	58856	internal,	I:gene_id "EG10857"; gene_name "rnc";	GCCGGATGCGCGCCACGCTGGTCCGTGGCAATACGCTGGCGGAACTGGCGCGCGAATTTGA
2704184	-	51499	orphan		AATATTCCCCCGAAGTTTAAGGTTGGCACCTCCAGGTTGCCACGGCACACGAAACAGCGTT
2709556	-	58095.4	internal,	I:gene_id "EG11897"; gene_name "rpoE";	AGTCCCTCCCGGAAGATTTACGCATGGCAATAACCTTGCGGGAGCTGGATGGCCTGAGCTA
2709889	-	66593.2	internal,	I:gene_id "EG11897"; gene_name "rpoE";	TGGTAGTGCGCTATCAGCATAAAGTGGCGAGTCTGGTTTCCCGCTATGTGCCGTCGGGTGA
2710044	-	90185.1	orphan		CCCTTTGCTTGCTCAAATTGCAGCTAATGGAGTGGCGTTTCGATAGCGCGTGGAAATTTGG
2720099	+	1963.61	internal,	I:gene_id "G7350"; gene_name "patZ";	CGTAACCTGCTGGCGGGAGGCTTTAACGGACCGGTACTCCCGGTGACGCCAGCCTGGAAAG
2724397	-	128177	antisense,	A:gene_id "EG12857"; gene_name "yfiM";	TGACGGGTCAGTTGCCAGACGGTATAGCCGGTGCTTGCACCGGCGACATCCCAGGCCAAAT
2725589	-	192869	internal,	I:gene_id "EG10522"; gene_name "kgtP";	CGATTTCTATGTCTACTCGTTCTGTTCACTCTACTTTGCCCACATCTTCTTCCCTTCCGGG
2729192	-	193630	orphan		TTGTTCGTGAGTCTCTCAAATTTTCGCAACTCTGAAGTGAAACATCTTCGGGTTGTGAGGT
2729331	-	84795.6	primary,	P:gene_id "EG30035"; gene_name "gltW";	CTAGGGGACGCCACTTGCTGGTTTGTGAGTGAAAGTCGCCGACCTCAATATCTCAAAACAG
2731408	-	157986	orphan		ATGCGCCACCACTGACACGGAACAACGGCAAACACGCCGCCGGGTCGGCGGGGTTCTCCTG
2734153	-	74454200	primary, internal,	P:gene_id "G0-10600"; gene_name "ryfD";,I:gene_id "EG10157"; gene_name "clpB";	TAGCAACTTTGATCCGTTATGGGAGGAGTTATGCGTCTGGATCGTCTTACTAATAAATTCC
2737542	+	62543.9	primary,	P:gene_id "EG11151"; gene_name "raiA";	GTAGTCCTTTATATTGAGTGTATCGCCAACGCGCCTTCGGGCGCGTTTTTTGTTGACAGCG
2741872	+	1392.21	orphan		GCATTCTGAAAAAATATCGATGCATTTCGAGCGAAGATGGTGGGGATCCCTGAATGCGTTT
2745857	-	63104.8	internal,	I:gene_id "EG11153"; gene_name "rimM";	ACTCACCGCGCAAGCACCTGTTGATCCCATCGTTTTGGGAAAAATGGGTTCGTCTTACGGT
2745987	-	44902.5	internal,	I:gene_id "EG10915"; gene_name "rpsP";	CTCGCCTGGATCTGGATCGCATCGCTCACTGGGTTGGCCAGGGCGCAACTATTTCTGATCG
2750062	-	57334.9	antisense,	A:gene_id "EG12442"; gene_name "yfjD";	TCTGCTTTCGTAATAATTCACGGCCCTGCATGCGAATGCCGGGCCGTTTTCGTTACTCCGC
2755634	+	6530.47	internal,	I:gene_id "EG30100"; gene_name "ssrA";	TTACACATTGGGGCTGATTCTGGATTCGACGGGATTTGCGAAACCCAAGGTGCATGCCGAG
2755955	+	927270	primary,	P:gene_id "EG30100"; gene_name "ssrA";	CCGAGGATGTAGGAATTTCGGACGCGGGTTCAACTCCCGCCAGCTCCACCAAAATTCTCCA
2766311	+	1397.8	internal,	I:gene_id "G7365"; gene_name "rnlA";	TACTTGAGCTATCAGCAGATGAATCGCATATAGAGTTCAGAGAACACTCTCGTAACGCTCA
2766897	+	2699.43	internal,	I:gene_id "G7365"; gene_name "rnlA";	CTATACTTTTTTTAATGTGGAACGTCATTCTCTGTTCCACATGGAAACTGTGGTCGATGCC
2767064	+	1024.31	internal,	I:gene_id "G7366"; gene_name "rnlB";	GGGGCTCTAAAAGCTGTCGTTATGGCGACCGGCTTCGAGAACCCTTTGTCCTCAGTTAATG
2791241	+	1035.46	internal,	I:gene_id "EG12387"; gene_name "lhgO";	GGACGCACGCTGCGAGCGGCACGTAGTGTGGATGCCTTACACGCCGCATTTAATCAATAAC
2796240	-	614566	antisense,	A:gene_id "EG12386"; gene_name "csiR";	AAATGCTGGCGCATTAACTCACTGGCGCGCGCGGTATCTCGCGCCAGTACCGCCGCAGTCA
2796391	+	1697.43	antisense,	A:gene_id "G7395"; gene_name "ygaU";	TCTTCCGGAATACGCAACACTTGCCCCGGATAAATTTTATCCGGGCTTTTTAGCATCGGTT
2796831	-	69321.1	primary,	P:gene_id "G7396"; gene_name "yqaE";	ACCCGCGATTAAACCTGTGCTCATCCCCGCGGCGTTAACGCGCCGCGTTCCTCTGCTACAC
2800533	+	4550.13	orphan		ATGATAATAAATACGCGTCTTTGACCCCGAAGCCTGTCTTCGGGGTTTCTTTTTGCCTGGT
2805035	+	2523.84	internal,	I:gene_id "EG10771"; gene_name "proV";	TGTCATCATGGGATTATCCGGCTCGGGTAAATCCACAATGGTACGCCTTCTCAATCGCCTG
2808169	+	1024.31	primary,	P:gene_id "EG10773"; gene_name "proX";	AAGTAATTTTTATTCGGGCGGATAAGGCGTTTTTGCCGCATCCGCCGTTCTGTGCACAATG
2809618	+	2309.2	internal,	I:gene_id "G7405"; gene_name "ygaZ";	TATTCATTCAGTCTATTTATAATATTAACAATCGTTAAGCGTACACTCTATGGAAAGCCCT
2809800	+	1318.37	internal,	I:gene_id "G7405"; gene_name "ygaZ";	TCTCTCCTCTCGAAAGCGTTTTTTTCTCCTGCATCATTTATGCAGGCGCGAGCCAGTTCGT
2814159	-	269862	antisense,	A:gene_id "EG11439"; gene_name "emrB";	CTATCTTCACAATTAATTGAAAAAAGCCAGTTCAAATGAACTGGCTTAGTTGTACTTAGTG
2814877	+	50178.7	primary, antisense,	P:gene_id "G0-8866"; gene_name "micA";,A:gene_id "EG10418"; gene_name "gshA";	TCCCTGAATTCAGAGATGAAATTTTGGCCACTCACGAGTGGCCTTTTTCTTTTCTGTCAGG
2814914	-	305886	internal, antisense,	I:gene_id "EG10418"; gene_name "gshA";,A:gene_id "G0-8866"; gene_name "micA";	CGAGGCGTCTGAACGCCGTCAGCAGGAAATGGAAGCCGCTGATACCGAACCGTTTGCGGTG
2817684	-	112703	orphan		AACCGCAGGCACCAGGAAGGATAACGTTGCGCCAGCAACGGCCCGAAGGGCGAACGTCAGT
2818012	-	101857	primary,	P:gene_id "EG30019"; gene_name "argZ";	ACCATATTCTCCGAAATCTTCAGCAATGAAGGTATCGAAGAGGTAGCGGAATTAACCGCAG
2818553	-	472214000	primary,	P:gene_id "EG30095"; gene_name "serV";	AGTATGCGGTCAAAAGCTGCATCCGGGGTTCGAATCCCCGCCTCACCGCCATTTGCATCCG
2818923	-	2429780	primary,	P:gene_id "EG11447"; gene_name "csrA";	GTCCAGTTACTAATCTTTCCGCGTCTCATCTTTATCGGTGAGACGCACCCTCAAAATTTCT
2819653	-	41033.9	internal,	I:gene_id "EG10034"; gene_name "alaS";	GTGTTAAGCTGTTGGTTAGCGAGCTTAGCGGTGTTGAGCCGAAAATGTTGCGTACCATGGT
2822664	-	77818.9	primary,	P:gene_id "EG10823"; gene_name "recA";	TTTTTAATCGTCTTGTTTGATACACAAGGGTCGCATCTGCGGCCCTTTTGCTTTTTTAAGT
2837453	-	40653.7	orphan		CGACCTGTGACTGCCGGATGCGACGCTGTCGTGTCCGGCAGGGCGGGTTACGCAATTCATG
2866510	-	51879.2	primary, antisense,	P:gene_id "EG10510"; gene_name "rpoS";,A:gene_id "G7421"; gene_name "ygbN";	AAGTAAGCATCTGTCAGAAAGGCCAGTCTCAAGCGAGGCTGGCCTTTTCTGTGCACAATAA
2867037	-	48010.7	internal,	I:gene_id "EG10510"; gene_name "rpoS";	ACGGGCGATTATGAACCAAACCCGTACTATTCGTTTGCCGATTCACATCGTAAAGGAGCTG
2867400	-	58095.4	internal,	I:gene_id "EG10510"; gene_name "rpoS";	ACCCAGTGATAACGATTTGGCCGAAGAGGAACTGTTATCGCAGGGAGCCACACAGCGTGTG
2867990	-	72809.4	internal,	I:gene_id "EG12111"; gene_name "nlpD";	ACCAACAGCAAGCACAACCGAGCCGACTGTCAGCAGTACATCAACCAGTACGCCTATCTCC
2887407	+	1505.11	internal,	I:gene_id "G0-10695"; gene_name "sokX";	GGGTTCGAACGCTGGCCTCAGGTTGATAGAAATATCGCCTGGGGCTTTTGTCCATCTGGAA
2904041	+	4187.8	orphan		AAAGAGATAACGGGTTATATGGTGGTTTATCCCCGCTGGCGCGGGGAACTCGACAGAACGG
2904320	-	190075	orphan		CGGGCAATCGCAAAAAGGCGTAATGTGTTCCCCGCGCCAGCGGGGATAAACCTGTGTTTGC
2908331	-	58856	internal,	I:gene_id "EG10810"; gene_name "pyrG";	GTAGCGAGAAGAGCGATCTCGGCGGTACCATGCGTCTCGGCGCACAGCAGTGCCAGTTGGT
2909628	-	448777	internal,	I:gene_id "EG10810"; gene_name "pyrG";	CTCAGGTTCAGCATGACAACGAACTATATTTTTGTGACCGGCGGGGTCGTATCCTCTCTGG
2913710	-	147520	internal,	I:gene_id "EG11247"; gene_name "rlmD";	TGGATATGTTCCCACACACGGGACATCTGGAATCGATGGTACTTTTCTCGCGCGTTAAATA
2924162	-	3948680	internal,	I:gene_id "G0-8785"; gene_name "csrB";	TGGAATGCTGCGAAACGAACCGGGAGCGCTGTGAATACAGTGCTCCCTTTTTTTATTCCTG
2924472	-	94119.7	internal,	I:gene_id "G0-8785"; gene_name "csrB";	CGACAGGGAGTCAGACAACGAAGTGAACATCAGGATGATGACACTTCTGCAGGACACACCA
2940106	-	40653.7	primary, antisense,	P:gene_id "EG11794"; gene_name "rlmM";,A:gene_id "EG10353"; gene_name "fucR";	GCGACGAGCGATAACAGGCAAGGCCGGGGCGTCGTCTCCGGCCTGCTACCCTTTCCGTCAG
2942768	+	132094	internal,	I:gene_id "G0-8867"; gene_name "gcvB";	GTTTTATCGGAATGCGTGTTCTGGTGAACTTTTGGCTTACGGTTGTGATGTTGTGTTGTTG
2942869	-	1164820	primary, antisense,	P:gene_id "G7453"; gene_name "ygdI";,A:gene_id "G0-8867"; gene_name "gcvB";	AATTCGCGATCGCAAGGTAAAAAAAAGCACCGCAATTAGGCGGTGCTACATTAATCACTAT
2945008	+	1669.55	primary, antisense,	P:gene_id "G7455"; gene_name "csdE";,A:gene_id "G7456"; gene_name "tcdA";	GATTATCGCTGCGACGAAGCAGGTTTAAGCACAGAACCGGGTCGGATAAGACGTTCGCGTC
2946050	+	1963.61	antisense,	A:gene_id "G7457"; gene_name "mltA";	ACGCGCACTTAGTCAATAATCAGGATGTGAGGTTACCCCTCACCCTGTCATATCCGTAAAA
2947469	+	1392.21	primary,	P:gene_id "EG30062"; gene_name "metZ";	CTCATAACCCGAAGGTCGTCGGTTCAAATCCGGCCCCCGCAACCAATTAAAATTTGATGAA
2947573	+	1024.31	primary,	P:gene_id "EG31117"; gene_name "metW";	GTCGGGCTCATAACCCGAAGGTCGTCGGTTCAAATCCGGCCCCCGCAACCAATCAAATTTG
2947715	+	2693.84	primary, antisense,	P:gene_id "EG30060"; gene_name "metV";,A:gene_id "G7458"; gene_name "amiC";	AATCCGGCCCCCGCAACCAATTATTGAACACCCTAACGGGTGTTTTTTTGTTTCTGGTCTC
2971521	+	10627.7	primary,	P:gene_id "G7461"; gene_name "ygdR";	GCAAATTATTGAACGTTAACAAATAAGGTCAGCATCCGGCTGGCCTTAAGATTTTTCTCTT
2976102	-	80166.4	primary,	P:gene_id "G0-8868"; gene_name "omrA";	CTTCGTACCCTGTCTCTTGCACCAACCTGCGCGGATGCGCAGGTTTTTTTTCGCACCTAAT
2976304	-	153736	primary,	P:gene_id "G0-8882"; gene_name "omrB";	GGGTTGAGCACATGAATTACACCAGCCTGCGCAGATGCGCAGGTTTTTTTTGCCGGTCATC
2987128	+	2201.88	orphan		ATCAGTTGTGGATGGTTCAAAATTGCTACAATTTTGAACCATTCCATTTTTCATAATATTC
2988499	+	3808.73	orphan		TACTTAGCAAACTATGTGATCTCCATTTCGATTGATTTAGTGTTTATTGACGTATGTACTG
2998984	-	181274500	primary,	P:gene_id "EG30037"; gene_name "glyU";	CGAGAGCTTCCCAAGCTCTATACGAGGGTTCGATTCCCTTCGCCCGCTCCAATTTATCTTC
3015142	+	1403.37	orphan		CAACTTAATCCATCAGGAAGTAACGCAATTATCAGGCGTTATTAGCCCCTATAAATAATGG
3049097	-	171112	orphan		TCTTCTGCGGGAGAGGATCAGGGTGAGGAAAATTTATGCCTCACCCTCACTCTCTTCGTAA
3050602	-	81687.3	internal,	I:gene_id "EG11442"; gene_name "gcvT";	CCTTTGTACGAACAACACACGCTTTGCGGCGCTCGCATGGTGGATTTCCACGGCTGGATGA
3050723	-	80100.6	orphan		AAGAGAACGATTGCGTTGGGGACCGGGAGTGGCTCCGATGCTGGGTTTCGTGGTGATAATT
3055657	+	1029.88	internal,	I:gene_id "EG12878"; gene_name "zapA";	GTGGCATGTCTGCACAACCCGTCGATATCCAAATTTTTGGCCGTTCACTGCGTGTGAACTG
3056168	+	456063	primary,	P:gene_id "EG30099"; gene_name "ssrS";	GAACCAAGGGTTCAAGGGTTACAGCCTGCGGCGGCATCTCGGAGATTCCCTTCTTATCTGG
3056785	-	146380	antisense,	A:gene_id "EG11158"; gene_name "fau";	TCAAAGAATCAACGATGTCAATCAGGGCGATGCGGGTGTATCGCCCTTACCACTCCCAGAC
3056959	+	263015	internal, antisense,	I:gene_id "G0-8886"; gene_name "sibC";,A:gene_id "G0-10631"; gene_name "ibsC";	ATGAGTAACAGTACAATCAGTATGATGACAAGTCGCATCATAACCCTTCTCCTTCAAGCCC
3056960	-	47250.1	antisense,	A:gene_id "G0-8886"; gene_name "sibC";	GGCAGCATGGGGCTGTAACGGTAAAGCCCTCACCGAAGCGAGGGCTTGAAGGAGAAGGGTT
3058638	-	46489.6	primary,	P:gene_id "EG11443"; gene_name "rpiA";	GTGTCAAAACCATTGTGAAATGATCTGACGGGGGAACCTCCCCCGTTAAAAAAATTCTCTT
3069950	-	44902.5	orphan		GACAAAGCGCACATTGATATCTGTCTGAGCCCCGCTCTGCGGGGATTTTTTCGCCAAAAGC
3070118	-	54607.1	primary,	P:gene_id "EG10282"; gene_name "fbaA";	GTAAGATATTCCTTTCTGCTTATCTCAAGGCCCGCTCTGCGGGTCTTTTTTTCGCCAAAAG
3071314	-	48771.2	orphan		ACAAGAGAGTGAATCCCCAGGAGCTTACATAAGTAAGTGACTGGGGTGAGCGAACGCAGAC
3072734	-	770832	internal,	I:gene_id "EG10368"; gene_name "epd";	GGGTCAGTGGCGCACACCTGATCAAAACGTTGGTCTGGTGCGATAACGAATGGGGCTTTGC
3085854	-	77438.6	internal,	I:gene_id "EG10959"; gene_name "speA";	ACGACATGTCTATGGGTTTGCCTTCGTCAGCGGGCGAACACGGTGTACTACGCTCCATGCA
3091559	+	1103.73	internal,	I:gene_id "EG12366"; gene_name "rsmE";	AAGAAGCTTCAGCAGTGGCAGAAGATTGCAATTGCTGCCTGTGAGCAGTGTGGTCGTAACC
3101642	-	231175	orphan		GAAAACGCGTACTTTGTTATCAATCTGGGGCCAGCAAATGCTGGCCTGATTTTTTCTTGAG
3103021	-	82133.6	antisense,	A:gene_id "EG10627"; gene_name "mutY";	TTTCGCCCGTATTTATCGTACCAGTCCAGAACCTGGGCTGAAAATTGCGACGCTTGCATGG
3104399	+	1958.03	primary,	P:gene_id "G7532"; gene_name "yggX";	CGCCGGAAGATAAAAAATAAAAACAGTGCCGGAGCACGCCTCCGGCAACTTGCATAAAAAC
3110443	+	2401700	primary,	P:gene_id "EG30065"; gene_name "pheV";	GGGATTGAAAATCCCCGTGTCCTTGGTTCGATTCCGAGTCCGGGCACCACTAATTCTTAAG
3121590	-	47630.3	primary, antisense,	P:gene_id "EG20080"; gene_name "glcB";,A:gene_id "G0-8912"; gene_name "C0719";	TCATTAATAGCGTCAAAAAAGCCCCGGCAAGTTTTATTGTCGGGGCTATGATAGTAACTGC
3127358	-	85175.6	internal,	I:gene_id "G7545"; gene_name "glcD";	ACCTGCTGGCGCTGTTCACCGGATCGGAAGGTATGCTCGGCGTGACCACCGAAGTGACGGT
3127974	-	333032	internal,	I:gene_id "G7545"; gene_name "glcD";	CTCATGAGCATCTTGTACGAAGAGCGTCTTGATGGCGCTTTACCCGATGTCGACCGCACAT
3153564	+	2919.64	internal,	I:gene_id "EG11824"; gene_name "yghB";	GAGTACAATAGGCAGATAAAGGCTTAAACGCTGTTCCACAGGAAAGTCCATGGCTGTTATT
3157494	+	1131.62	primary,	P:gene_id "G7565"; gene_name "dkgA";	CGGCTAACATGCAAATTCTCCCGGTGGCGGTAATGTTCCGCTACCGGACTTTTCAGAAATC
3169249	-	422457	primary,	P:gene_id "G7574"; gene_name "ygiW";	CAAAGTAAATCCGTAATTGTTACCGCTCCCGGGACGCGTTCCCGGGAATAATTTCGCAGGG
3173496	+	4080.48	primary, antisense,	P:gene_id "EG12657"; gene_name "ygiN";,A:gene_id "EG10687"; gene_name "parE";	CAGGGATTTAATCCTGCCTTGTTTGCCCGGCCATCCTGACCGGGCAATGTTCTTTCCTTTA
3175558	-	44902.5	internal,	I:gene_id "G7578"; gene_name "yqiA";	GGAAGCGCCGGATTTGATCTGGCTGCTGCAACAGACGGGAGATGAAGTGCTGGATTACCGC
3176577	-	103378	internal,	I:gene_id "G7579"; gene_name "cpdA";	ATCCTCTGCGGCCTATCAGCATTTCGCTGAAGGCATCGCAAGTTTTCGTGCGCCCTGCGTC
3176780	-	102238	internal,	I:gene_id "G7579"; gene_name "cpdA";	GAAAGCCTGTTAACCCTTCCTCTGGCTGGTGAGGCCAGAGTCAGGATTTTACAAATTACCG
3177983	+	2908.48	orphan		GTGAATTAAATGTGAATTTCAGCGACGTTTGACTGCCGTTTGAGCAGTCATGTGTTAAATT
3179628	+	1584.54	primary, internal,	P:gene_id "EG11009"; gene_name "tolC";,I:gene_id "EG11163"; gene_name "ygiA";	TAACCCTTTCCGTAACTGATGACGACGACGGGGCTTCGGCCCCGTCTGAACGTAAGGCAAC
3184566	-	740015	orphan		TGTAATTCCGGGGCCGACGGTTAGAGTCCGGATGGGAGAGAGTAACGATTCTGTCGGGCAT
3184678	-	87903.7	orphan		TAGTGAATCCGCTTATTCTCAGGGCGGGGCGAAATTCCCCACCGGCGGTAAATCAACTCAG
3185189	+	1493.95	orphan		CTTTAATGCACTGTAAATTATGAATTAATCCTCTAATTTATAGTGCTTTCTATTACCTTAT
3191049	-	62724.7	antisense,	A:gene_id "G7587"; gene_name "yqiI";	AGTTACTGATAATTGCGGTTCAGGACCGCCACTACAGACTGCGGGCTTTTTGTAGCCATTC
3191712	-	745851	primary, antisense,	P:gene_id "EG11381"; gene_name "glgS";,A:gene_id "G7587"; gene_name "yqiI";	AGAGAGCTGGAGTTAGAGCACTGATATAACGGGCCTGATGGCCCGTTTTAGTGTTTGTATT
3194756	-	3046425	internal, antisense,	I:gene_id "G0-8913"; gene_name "sibD";,A:gene_id "G0-10630"; gene_name "ibsD";	ACGAGTAACAACACAATCAGTATGATGACGAGCTTCATCATAACCCTTTCCTTCTGTAAGG
3195129	-	4441990	internal, antisense,	I:gene_id "G0-10602"; gene_name "sibE";,A:gene_id "G0-10629"; gene_name "ibsE";	CAGTAACAACACAACCAGTATGATGACGAGCTTCATCATAACCCTTTCCTTATACAAGGCC
3204707	+	1312.79	internal,	I:gene_id "EG11674"; gene_name "ygiH";	TCATCGTTGAACACGAATTTTCAAAACGGAACAGCTTATGAGTGCAATCGCGCCTGGAATG
3211076	+	84293.9	orphan		CCGAGTTGTAGTTGTAAGGCCGTGCTTCCGAAAGGAATGCGCGGCTTATTTTCGTTTATGA
3212789	+	1029.88	internal,	I:gene_id "EG10239"; gene_name "dnaG";	TCGCTGCTTGAACTGCGCCAGGAAGAGTTAATCGCTCGTGAGCGCACGCATGGTTTAAGCA
3212941	+	1686.28	orphan		CCGACAGCCGCACTGAGAGGCAGCGGCAAATATATAAGTACGCCCTCGTAATTATCGTTGG
3215673	+	201120	primary,	P:gene_id "EG30046"; gene_name "ileX";	AGGCGACTCATAATCGCTTGGTCGCTGGTTCAAGTCCAGCAGGGGCCACCAGATATAGCAA
3238482	+	16511.6	orphan		TCCGGTCACCGGGCAACCCGAAAGGAATACGCAGACGTATTCCTTTTTTGTTGTAAGTGAG
3239923	+	23514.3	orphan		TGTTACATCCTGAAAGATGCGTCGACAGAACGCACCAGGGATGTGCGACAACACAATGAAA
3245945	+	1952.44	internal,	I:gene_id "EG12738"; gene_name "exuT";	GCGTAACCGTCAGTTCTGGGGTATCGCGCTGCCGCGTTTCCTGGCAGAACCGGCCTGGGGT
3249405	+	4742.45	internal,	I:gene_id "G7612"; gene_name "yqjD";	TTACTCACCTGGAGAAAACTATGTCGAAAGAACACACTACGGAACATCTGCGTGCTGAGTT
3250409	+	3576.03	primary,	P:gene_id "G7614"; gene_name "yqjK";	CAACAGCTTCGCGGTTAACTTCCCTCTGGCCGGAGCCATTCCGGCCTTATCCCTCAAATTT
3270216	-	11929300	primary,	P:gene_id "EG30069"; gene_name "rnpB";	TAGATGAATGACTGTCCACGACAGAACCCGGCTTATCGGTCAGTTTCACCTGATTTACGTA
3278073	-	40273.3	internal,	I:gene_id "G7630"; gene_name "agaR";	TATGCTGTTTCTTGGTGTAGATGCGATCGATCTGGAGCGCGGCGTCAGCACACATAATGAA
3278188	-	76678.1	internal,	I:gene_id "G7630"; gene_name "agaR";	CGTTGCTGGAAGCGGAAGGCGTTGAGCTGCTGATGACCGGCGGGCATTTGCGCCGTCAGTC
3298255	+	3633.14	antisense,	A:gene_id "G7646"; gene_name "yraR";	GAATAATTATTCAGCTCTTTTGCGTAATTCTGAAGAGCTTAAAATCGTCACGCCTTCATGC
3307973	-	101097	orphan		CCCGTAATCTTTTTTGATTGCCATCACCTTAACGGGTGAGGGCGTTGTTGTTCGTTAATAC
3308570	-	360873	internal,	I:gene_id "EG12371"; gene_name "nlpI";	TAGGCATATATTTAACGCAGGCAGGCAATTTTGATGCTGCCTATGAAGCGTTTGATTCTGT
3309109	-	55367.6	internal,	I:gene_id "EG10743"; gene_name "pnp";	GGAAGTACCGGTGAAAGTTCTGGAAGTTGATCGCCAGGGCCGTATCCGTCTGAGCATTAAA
3311287	-	2122815	antisense,	A:gene_id "G0-8870"; gene_name "psrO";	GTATTGTTGCTATGAATGATCTTCCGTTGCAGAGGTTCGCGCGGCTAATGAGAGGCTTTAC
3311515	-	54987.4	internal,	I:gene_id "EG10914"; gene_name "rpsO";	GGGCCACTTTGCAGAGCACAAAAAAGATCACCACAGCCGTCGTGGTCTGCTGCGCATGGTT
3311707	-	224578	orphan		TTGCGTAACGTACACTGGGATCGCTGAATTAGAGATCGGCGTCCTTTCATTCTATATACTT
3318213	-	52902100	primary,	P:gene_id "EG30061"; gene_name "metY";	GTCGGGCTCATAACCCGAAGATCGTCGGTTCAAATCCGGCCCCCGCAACCACTTTCCCTTA
3322072	-	98281050	primary,	P:gene_id "EG30050"; gene_name "leuU";	GGTGGTAGTGCCCAATAGGGCTTACGGGTTCAAGTCCCGTCCTCGGTACCAAATTCCAGAA
3322389	-	135914	internal,	I:gene_id "EG12095"; gene_name "secG";	CAGCAAGGTAAAGGCGCTGATATGGGAGCCTCCTTCGGAGCAGGCGCTTCCGCTACGCTGT
3322535	-	40273.3	orphan		TTCAGTGGGAAAGATTAAAAACTCCCGCTTTATTGGTTGAAGCATTGGTACGCGGCAACTC
3327992	-	111496	antisense,	A:gene_id "EG12794"; gene_name "yhbY";	AAAGCACCAGCGTTTTACCGATGACCTGTACATTACAGGCGCCGGTTTCGCGCACGATAGC
3328197	+	3910.47	antisense,	A:gene_id "EG10415"; gene_name "greA";	AAAATGCCACGCTCTGTTCGTTGATAAAAGGCCGCATAGCGGCCTTTTTCCTTTCTTTACA
3328811	-	61203.6	orphan		AAAATGTGAATTGTAGCTGACCTGGGACTTGTACCCGGGTCGGTATTTTTTTGCTTCTGGT
3333458	-	48390.9	orphan		AATATTTATAGCGCACTCTGAATCATTGAAAAGGTGTGCGCGGAAGCGGAGTTTTATATGT
3336874	-	62344.3	orphan		GCAAACCTGCCTGCAAGTCGAGCCTTGTCTGATTTATCAGCGAGGCTTTTTGCTTATTTAT
3342992	+	1194.31	internal,	I:gene_id "G7664"; gene_name "lptC";	ACAACAATGATCCCACCTATAAAAGCGAGCATACGGACACGCTCGTCTATAACCCAGAAGG
3348581	+	10893.9	internal,	I:gene_id "G7667"; gene_name "yrbL";	GCTGTATCAAGATTGTCTACCATCGTGGCGATGGTGGCGATAAAGAGATCCGCCGTGAGTT
3349182	+	2303.62	antisense,	A:gene_id "G7668"; gene_name "mtgA";	CTGCCGTAAAATCCACGCCTGACGGCTACGCACGTAGCCCGATGGCGAGGAGACTTTGAAA
3350696	+	89663.8	internal, antisense,	I:gene_id "G0-8871"; gene_name "arcZ";,A:gene_id "EG10062"; gene_name "arcB";	CCTGGTGTTGGCGCAGTATTCGCGCACCCCGGTCTAGCCGGGGTCATTTTTTAGTGGCTTT
3367641	-	106486	internal, antisense,	I:gene_id "G0-10703"; gene_name " ";,A:gene_id "G7673"; gene_name "yhcF";	CCGATCGTATAAAACGAATGCCTGATAGTACTCCTGTCCGGCATTGTTATCACAAGTAGAC
3378595	-	193564	internal,	I:gene_id "EG10874"; gene_name "rplM";	ACTTTTACAGCTAAACCAGAAACCGTAAAACGCGACTGGTATGTTGTTGACGCGACCGGTA
3380163	+	1114.89	orphan		TTATAGTGGCATAATCAGCCGCAGGCATGGAGCCTGAAGCCAACACCCTACGGAAACAAAA
3380623	+	2523.84	primary,	P:gene_id "G7681"; gene_name "yhcB";	GCGCGAAGCGCGACTAATTTATTTTTCGGGCGCAGCCATTGCGCCCTCCTCTTCTCTCCCT
3384211	-	51879.2	internal,	I:gene_id "EG10576"; gene_name "mdh";	TCGCAGTCCTCGGCGCTGCTGGCGGTATTGGCCAGGCGCTTGCACTACTGTTAAAAACCCA
3385522	+	1493.95	orphan		ACTTGATTTTGTGATATGGGTCACGAAACAAAGGCCCAGCTAAAAGATTATGTCGAGGTAA
3385823	-	183544	primary, antisense,	P:gene_id "G7684"; gene_name "yhcO";,A:gene_id "G7683"; gene_name "yhcN";	TTAATGTTCGTCATTAGCGCAAAAAAAAGCCCCCGAACCGGGGGCAATATCGTCGGACAAG
3392339	-	51879.2	orphan		ATAACCGTAGGTCGGATAGGGCGTTCACGCCGCATCCGGCAGCCGTTGCCTGATGCGACGC
3423423	-	52021450	primary,	P:gene_id "EG30091"; gene_name "rrfF";	CCGATGGTAGTGTGGGGTCTCCCCATGCGAGAGTAGGGAACTGCCAGACATCAAATAAAAC
3423580	-	1106310000	primary,	P:gene_id "EG30103"; gene_name "thrV";	GCACCCTTGGTAAGGGTGAGGTCCCCAGTTCGACTCTGGGTATCAGCACCACTTTTTAGGT
3426791	-	59616.5	orphan		TTGTTCGTGAGTCTCTCAAATTTTCGCAACTCTGAAGTGAAACATCTTCGGGTTGTGAGGT
3428984	-	44522.3	orphan		CGTGAAACACTTCACAGGATGGTCGGAACAACGAAGAGAAAAAAATCCTGAAATTCAGGGT
3430924	-	73950.2	internal,	I:gene_id "G7698"; gene_name "tsaC";	TGTCGAACAGTAGACGAAGTTCGCGCACAATTTGGCGCGGCGTTCCCGGTTGTGCCTGGTG
3431798	-	58475.8	internal,	I:gene_id "G7699"; gene_name "yrdD";	CCGGCGTGTGACTACGTCCGTCCTCTGAAATCTTCAGCGGATGGACATATCGTCAAAGTTC
3433805	+	3078.49	internal,	I:gene_id "EG11440"; gene_name "def";	AGAAGTGAATGCAGAAATTCAGCGTATCGTCGATGATATGTTCGAGACGATGTACGCAGAA
3434287	+	2364.98	internal,	I:gene_id "EG11268"; gene_name "fmt";	TTTTGCGGGTACACCTGACTTTGCAGCGCGTCATCTCGACGCGCTGTTGTCTTCTGGTCAT
3438498	+	17389.5	antisense,	A:gene_id "G0-10465"; gene_name "arfA";	GCAGAAGACCAGTGGTAAAAAAGTGATTTACTTTCTTGCCACTGGCCTCCCAGTTCCCCCG
3442430	-	76678.1	internal,	I:gene_id "EG10912"; gene_name "rpsM";	GAGTGCATAGTGGCCCGTATAGCAGGCATTAACATTCCTGATCATAAGCATGCCGTAATCG
3442551	-	77818.9	orphan		TCTTGCAAAGTTGGGTTGAGCTGGCTAGATTAGCCAGCCAATCTTTTGTATGTCTGTGCGT
3442846	-	72809.4	internal,	I:gene_id "EG10766"; gene_name "secY";	TCGGTGGGACCTCACTGCTTATCGTTGTTGTCGTGATTATGGACTTTATGGCTCAAGTGCA
3443246	-	144792	internal,	I:gene_id "EG10766"; gene_name "secY";	AAAGTGAATATGGCGGGGGTAATCCCGGCAATCTTCGCTTCCAGTATTATTCTGTTCCCGG
3448054	-	82828.2	internal,	I:gene_id "EG10875"; gene_name "rplN";	GCACGTCGCGTAATGTGTATCAAGGTTCTGGGTGGCTCGCACCGTCGCTACGCAGGCGTAG
3448363	-	41033.9	internal,	I:gene_id "EG10916"; gene_name "rpsQ";	ATGCGGTATCGGTGACGTGGTTGAAATCCGCGAATGCCGTCCGCTGTCCAAGACTAAATCC
3450367	-	416936	internal,	I:gene_id "EG10918"; gene_name "rpsS";	GTTCAACGATCTTTCCTAACATGATCGGTTTGACCATCGCTGTCCATAATGGTCGTCAGCA
3453304	-	1527210	orphan		AAGAACGGTTACACTCTCCCATCAATCGTAATGGGTCTGAGGAGTAATCATTTTCGTTTAT
3466218	-	2955315	primary, antisense,	P:gene_id "EG10113"; gene_name "bfr";,A:gene_id "EG11359"; gene_name "gspO";	AGATCCGCGAAGAAGGTTGAGCCGTGTCGGGAGGGAGAACCCTCCCGGTTAATAAGAGATC
3471328	-	41033.9	internal,	I:gene_id "EG11036"; gene_name "tufA";	TCCCGTGCTCTCTCCTGAAGGGGAGAGCACTATAGTAAGGAATATAGCCGTGTCTAAAGAA
3471536	-	181644	internal,	I:gene_id "EG10360"; gene_name "fusA";	AGGTCAGGAATCTGAAGTTACTGGCGTTAAGATCCACGCTGAAGTACCGCTGTCTGAAATG
3474080	-	44902.5	internal,	I:gene_id "EG10906"; gene_name "rpsG";	TAAACTCGTAGAGTTTTGGACAATCCTGAATTAACAACGGAGTATTTCCATGCCACGTCGT
3474474	-	48010.7	internal,	I:gene_id "EG10911"; gene_name "rpsL";	AACCACGTGCTCGCAAAGTTGCGAAAAGCAACGTGCCTGCGCTGGAAGCATGCCCGCAAAA
3474593	-	142130	orphan		CGGCATCGCCCTAAAATTCGGCGTCCTCATATTGTGTGAGGACGTTTTATTACGTGTTTAC
3478452	-	43001.2	internal,	I:gene_id "EG11663"; gene_name "slyD";	ATATCATGAAAGTAGCAAAAGACCTGGTGGTCAGCCTGGCCTATCAGGTACGTACAGAAGA
3486117	+	5036.52	orphan		GACAGCGGCGTTATCTGGCTCTGGAGAAAGCTTATAACAGAGGATAACCGCGCATGGTGCT
3486794	+	2858.28	primary, internal,	P:gene_id "EG10164"; gene_name "crp";,I:gene_id "G7721"; gene_name "yhfK";	ACTCGTTAATCCCGTCGGAGTGGCGCGTTACCTGGTAGCGCGCCATTTTGTTTCCCCCGAT
3519005	-	48390.9	internal,	I:gene_id "EG10081"; gene_name "aroK";	AAACGCAATATCTTTCTGGTTGGGCCTATGGGTGCCGGAAAAAGCACTATTGGGCGCCAGT
3519310	-	84035.1	orphan		TCGCTGCCTGCGTTCCATGATGATGATTTATCATTCAGGCGGCATTTTGCTGTCTTTTTTA
3526064	-	54226.8	internal,	I:gene_id "G7740"; gene_name "nudE";	TGTTGAAACTGTAGCCCGTTCCCGACTGTTTACCGTCGAGAGCGTGGATCTGGAGTTCAGC
3532767	+	1856.29	orphan		TGAATTTCTCCAGATACGTAAATCTATGAGCCTTGTCGCGGTTAACACCCCCAAAAAGACT
3547980	+	1595.69	antisense,	A:gene_id "EG10561"; gene_name "malQ";	TGAATTAGTAGGCCGGATAAGACGCGTCAAGCATCGCATCCGGCATCAACCGCACTCTACT
3574776	-	40653.7	internal,	I:gene_id "EG10088"; gene_name "asd";	TGCAACGCATGGTTGAAGAGCGCGACTTCGACGCCATTCGCCCTGTCTTCTTTTCTACTTC
3574883	-	43001.2	orphan		CAAGAGGAGACCGGCACATTTATACAGCACACATCTTTGCAGGAAAAAAACGCTTATGAAA
3578650	-	91772.4	internal,	I:gene_id "EG12630"; gene_name "gntR";	GGATGTGGCTGACCGTGTAGGCGTGACCAAAATGACGGTCAGCCGTTTTTTACGCAACCCG
3578999	+	2721.74	antisense,	A:gene_id "G7756"; gene_name "yhhW";	TTTAAACCGGCGGCAGATCGAACAGTAACACTTCGCTGTCGCTATCCGCATGGATGGAGAT
3580958	-	45282.8	internal,	I:gene_id "G0-8872"; gene_name "ryhB";	GAAGACCCTCGCGGAGAACCTGAAAGCACGACATTGCTCACATTGCTTCCAGTATTACTTA
3586994	+	5602.32	internal,	I:gene_id "EG11184"; gene_name "yhhA";	TGAAACGACTTCTGATTCTTACGGCACTCCTGCCGTTTGTCGGCTTTGCACAGCCCATTAA
3590983	-	40273.3	primary,	P:gene_id "EG11047"; gene_name "ugpB";	CTTTGAGAAATCGACGAAGTCTTAATCAGTGTAATGTCGGATGCGTTTCGCTTATCTGACC
3600802	-	425251	orphan		TGCTCTTAAGCTCTGGCACAGTTGTTGCTACCACTGAAGCGCCAGAAGATATCGATTGAGA
3602912	-	40273.3	internal,	I:gene_id "EG10346"; gene_name "ftsY";	GTAAGCCAGGCCAAACTGTTCCATGAAGCCGTTGGCTTAACCGGCATCACGCTAACGAAAC
3609992	+	1222.2	internal,	I:gene_id "G7767"; gene_name "dcrB";	AAGGAAGAAGTCAATGCGCAATCTGGTTAAATATGTCGGAATTGGCCTGCTGGTTATGGGG
3630667	-	98749.1	orphan		GCGCTGGTCGTATTTGCCGTTTCCTTCTTATCCCGGATGGAAGAATCCGCTGAACGTCGTT
3630827	-	643233	orphan		GCGTGAAACGCTATCCAACAGGATGGATACCGTTTTGTCAGCCAGTTTTATAGATCACACT
3639154	-	130524	antisense,	A:gene_id "EG12230"; gene_name "pitA";	ACAAAGCGCACTATGTCACAATCTGAAGCGGGCCAGCTGACCCGCTCGTTTTGGTGCGTAC
3639733	-	109975	orphan		GCAGCGTATCGGGAGCGGTAGCCCCGGGGTGGAACTCCGCGGGCAGGTCGCCGGGGAGGAG
3640022	+	5336.15	orphan		TAAGGTAAGGATGGTCTTAACACTGAATCTTTACGGCTGGGTTAGCCCCGCGCACGTAGTT
3640595	+	1029.88	primary,	P:gene_id "EG11390"; gene_name "uspA";	ATCTTCCCTCTACGACGTGTTCCTGAACGCCCGCATATGCGGGCGTTTTGCTTTTTGGCGC
3647653	-	580823	antisense,	A:gene_id "EG10412"; gene_name "gor";	AGCGGAAACGTAATTAAGGGCTAAGAGCACACTACTCTTAGCCCTTTAACATTTAACGCAT
3648147	+	8482.92	primary,	P:gene_id "G0-10751"; gene_name "agrA";	CCAACTCAGGGCTGGAAAGTAAAAAACCGACGCAAAGTCGGTTTTTTTACATCCGGATTCG
3648377	+	1697.43	primary,	P:gene_id "G0-10752"; gene_name "agrB";	ACCAACTCAGGGCTGGAAAGTAAAAAACCGACGCAAAGTCGGTTTTTTTACGTCCTGATTC
3655910	-	61203.6	orphan		TGCAAGTAAAAAGGAGTAGCAAGTTGAGCCATCTTGCTGCTCCTTTTTGCATTTTTATATG
3656317	-	176188	orphan		CAGGCCGGAATATCTTCTTTAAAAGCAGCTATTCCTCCTGTTCATATATAATCTCTATATT
3657984	-	171112	primary,	P:gene_id "G0-10694"; gene_name "arrS";	AGTCTCCTTGTTTCGACTTAAGCTGGCAATTGGATTGCCAGCTTTCTTTTAACGCATTGAA
3664875	-	125068	antisense,	A:gene_id "G0-8914"; gene_name "gadY";	TCTCCAGACTAATAAACCGTTATAACACTCCCTGTTGGCACGGGAAACTTTGTGCTCTCAG
3664969	+	16443.3	primary, antisense,	P:gene_id "G0-8914"; gene_name "gadY";,A:gene_id "EG12243"; gene_name "gadX";	CTGGAGACGGCAGACTATCCTCTTCCCGGTCCCCTATGCCGGGTTTTTTTTATGTCTGAGT
3665222	-	89424.8	internal,	I:gene_id "EG12243"; gene_name "gadX";	GCGAAGAAGAGACATCATATTCACAGTTGCTTACTGAGTGTAGAATGCAACGTGCTTTGCA
3665532	-	91772.4	internal,	I:gene_id "EG12243"; gene_name "gadX";	AAAAAAGTTTCTTCATTACTCGTTCATCACTGTAGTAGAGATATTCCTGTTTTTCAGGAAG
3671519	+	1771.28	antisense,	A:gene_id "EG12246"; gene_name "yhjB";	TAACGATTTGAGATCTTTAATGTCCTTTTCCGGCGTCGTCCGCCAGTCTCCAGGCAGAAAC
3696237	-	145999	orphan		AGTGAGCAAATTCCCGTCTCGCCGTAAACAATAAACCGGCGAAATGCTCACGGTTAGAATT
3696639	+	3746.04	internal,	I:gene_id "EG12263"; gene_name "bcsE";	TCAAACAATTGCATCCCAGGCTGAAACCGCACACGTCGCGGTCATTAGCATGGACAGCGAT
3699668	+	6954.16	internal,	I:gene_id "EG12265"; gene_name "bcsG";	CCCGTTGGGGTGAAATTCTTCGGCATGAAGGCACCGCATCAGGGGGCACCGATTGTCATCG
3700202	+	9128.16	primary,	P:gene_id "G0-9042"; gene_name "rdlD";	AGCCCCCGTGGTGTTGTCAGGTGCATACCTGCAACGTGCGGGGGTTTTCTCTCTCCAGCAA
3705372	-	39893.1	internal,	I:gene_id "EG12625"; gene_name "dppB";	TAAACGCGGTTCCATTTTCGATCACACAGCGGTTGGCCTGGCGCTGACAGGTTATTCAATG
3705889	-	209104	orphan		CAATCTGTATACCCGGTGGCGCTGTGCCTCTGCGTGCAGCGCCATCCGGCAGCAATACTTC
3706189	-	55747.9	internal,	I:gene_id "EG10248"; gene_name "dppA";	AGCGCAGGTGGTGATGCACGATCAGGCTCCGGCACTGATCATCGCTCACTCCACCGTGTTT
3707064	-	48010.7	internal,	I:gene_id "EG10248"; gene_name "dppA";	GGTACACCGGAAAAACTGGACCTCAACCCAATCGGAACCGGTCCGTTCCAGTTACAGCAGT
3707437	-	64311.7	internal,	I:gene_id "EG10248"; gene_name "dppA";	AGTGATCCCGGGCCTCGCTGAAAAGTGGGAAGTCAGCGAAGACGGTAAAACCTATACCTTC
3707800	-	3491085	orphan		GATCCGCACTGTTACACTGATGTTAATTAGTACGGCATCCCCACCTCATAACGTTGACCCG
3708616	-	212478500	primary,	P:gene_id "EG30066"; gene_name "proK";	ACTTCGTTCGGGACGAAGGGGTCGGAGGTTCGAATCCTCTATCACCGACCAAATTCGAAAA
3719460	+	1652.81	orphan		TTTCCCGACTATTCTTAATGAGCTTCGATGCAATTCACGATCCCGCAGTGTGATTTGAGGA
3719662	+	2886.16	internal,	I:gene_id "EG12624"; gene_name "yiaG";	AGGATTAAAAATCGATGATTTCGCCCGGGTTTTGGGCGTATCAGTCGCCATGGTAAAGGAA
3719819	+	9309.32	orphan		ACTTTTATCCACTTTATTGCTGTTTACGGTCCTGATGACAGGACCGTTTTCCAACCGATTA
3720313	+	118320	orphan		CTCTGCTTAAAAGCACAGAATCTAAGATCCCTGCCATTTGGCGGGGATTTTTTTATTTGTT
3720444	+	1114.89	antisense,	A:gene_id "G0-9613"; gene_name "hokA";	ATGAGAATGCGCAACGCCGTAAGTAAGGCGGGAATAATTTCCCGCCGAAGACTCTTACTCT
3721992	-	365502	antisense,	A:gene_id "G0-10624"; gene_name "insJK";, gene_id "G7777"; gene_name "insK";	CGAGGCATATAGGTCTGATTCCGATATTCAATTGGAGTCAGACCTTTTAATTTCAGGCTAA
3725255	-	51118.8	internal,	I:gene_id "EG10409"; gene_name "glyQ";	ATACCAGGACCTTCCAGGGCTTGATCCTGACCTTACAGGATTACTGGGCTCGCCAGGGCTG
3729386	-	55367.6	orphan		ACTGTGCAGTCCGTTGGCCCGGTTATCGGTAGCGATACCGGGCATTTTTTTAAGGAACGAT
3736826	-	63865.4	internal,	I:gene_id "EG11360"; gene_name "bax";	GGCTCATTTCAAAACAGTATCAGGGCCAATGGTCACCTGCTGAGCGTGCGCGTCTGAAAGA
3737011	-	493614	internal,	I:gene_id "EG11360"; gene_name "bax";	CTTAACTAAAGCTAGTAATAAACAGGTAAGCAGTAAACAAGAGTATTCTCGCAATAGTGCA
3741106	+	7854.41	antisense,	A:gene_id "EG12277"; gene_name "ysaA";	TCTGGCATAAACAAAGCGCACTGTTCCGGCGTTGAGAAACGCCGGAAAACGTTTCAAACAG
3767780	+	1488.38	internal,	I:gene_id "EG11766"; gene_name "yibJ";	GATTAATATCCCAGGCGTTTTCACAATCGGGGGGCATGGTACCCCCACATCTATTGAATCC
3774365	+	1284.9	orphan		GCGCTTACGCCGCATCCGGCGCTGCCCCTCTCCTCACGGAGAGGGTTTGGGTGAGGGAAAA
3775998	-	107627	antisense,	A:gene_id "EG11965"; gene_name "mtlR";	ACTGGAGTCTGCTGGTTCAAACTGTGGCGGCGGTGGTAACGCCGCCACGCAGTGCAGTTCA
3776158	-	40273.3	primary, antisense,	P:gene_id "G0-10468"; gene_name "yibT";,A:gene_id "EG11965"; gene_name "mtlR";	GTCGGCTTTATCGGCCGAAGCAGGTAGAGGGGCAGTAAGCAGACGTTGCTTACTTTTGAAA
3782628	-	54226.8	primary,	P:gene_id "EG20091"; gene_name "gpsA";	AGGTCGTGCACGCAAGGACGAGCGCAGCAGCCACTAACCCCAGGGAACCTTTGTTACCGCT
3783602	-	63485.2	internal,	I:gene_id "EG20091"; gene_name "gpsA";	CGTAATGCTTCAATGACTGTGATCGGTGCCGGCTCGTACGGCACCGCTCTTGCCATCACCC
3784133	-	57715.2	orphan		ACGTTGGCATTACATTGCGCAGTATTTAAGGACAACACTTAAGGGTTTTCTACACATGTCA
3790287	-	66213	primary,	P:gene_id "EG10993"; gene_name "tdh";	ATTCTGAGCTGGGATTAACACGAACAAGGGCTGGTATTCCAGCCCTTTTATCTGAGGATAA
3808183	-	116952	orphan		GTAAGTGCGTTATCAGTATTCAGGTAGCTGTTGAGCCTGGGGCGGTAGCGTGCTTTTTTCT
3811202	-	72048.9	primary,	P:gene_id "EG10891"; gene_name "rpmG";	TAATTCTCGCTTTGATGTAACAAAAAACCTCGCTCCGGCGGGGTTTTTTGTTATCTGCTTG
3811673	-	185826	internal,	I:gene_id "EG10886"; gene_name "rpmB";	CCAATACCCCATACGAAGCTCGAGCTAATTTGATTTTTGGAGAATAGACATGTCCCGAGTC
3811957	-	147966	internal,	I:gene_id "EG11312"; gene_name "yicR";	AAACTCATTACTGAACGGATAATAAAGAGTTGTCAGTTCATGGATTTACGCGTGCTCGACC
3821471	+	2880.59	internal,	I:gene_id "EG10965"; gene_name "gmk";	GATACTCATGGCTCAAGGCACGCTTTATATTGTTTCTGCCCCCAGTGGCGCGGGTAAATCC
3822038	-	40273.3	antisense,	A:gene_id "EG10965"; gene_name "gmk";	GGTGAAGAAATGACTGGGCATGATACTGAAATCAGGTTCAGTCTGCCAACAATTTGCTGAT
3822107	+	1414.53	internal,	I:gene_id "EG10899"; gene_name "rpoZ";	ATTTCAGTATCATGCCCAGTCATTTCTTCACCTGTGGAGCTTTTTAAGTATGGCACGCGTA
3836316	+	4863380	primary,	P:gene_id "EG30092"; gene_name "selC";	TTGGGGCCGCCAGCGGTCCCGGGCAGGTTCGACTCCTGTGATCTTCCGCCAAAATGCCTCT
3852897	-	616782	internal,	I:gene_id "EG11275"; gene_name "ivbL";	GCCATCCGCCGCAGTGGTCGTCGTGCGTGTGGTGGTGGTCGTCGGCAATGCGCCGTAGGGA
3853116	-	421316	primary,	P:gene_id "G0-10202"; gene_name "istR-1";,gene_id "G0-10201"; gene_name "istR-2";	GTTACCAGCCGCAGGCGACTGACGAAACCTCGCTCCGGCGGGGTTTTTTGTTATCTGCAAT
3853441	+	2043.03	orphan		CTGAAACGGGTGGTGCCGTCAGCGCCTTAACCCCGCGTGAGCACACTGTGTTATGTCAACA
3855529	-	54607.1	internal,	I:gene_id "EG11694"; gene_name "yidF";	GGACAGGCATAAACTGGTTGTAGAGTACAAGGATGCTCTGCAACCTGCCGATTTTTATCAC
3881679	-	43381.5	internal,	I:gene_id "EG10242"; gene_name "dnaN";	AAGGCGTGATTGAACTGATGCGTATGCTCGACGGCGGCGACAATCCGCTGCGCGTACAGAT
3883796	-	386052	orphan		ATAACCGCAGACAGCGGTTCGTGCGTCACCCTCAAGCAGGGTCTTTTCGACGTACGTCAAC
3884542	+	33049.5	internal,	I:gene_id "EG10862"; gene_name "rnpA";	AGTGGTTAAGCTCGCATTTCCCAGGGAGTTACGCTTGTTAACTCCCAGTCAATTCACATTC
3888521	+	94873.2	primary,	P:gene_id "EG11276"; gene_name "tnaC";	TTCAATATTGACAACAAAATTGTCGATCACCGCCCTTGATTTGCCCTTCTGTAGCCATCAC
3889771	+	1024.31	internal,	I:gene_id "EG11005"; gene_name "tnaA";	TGGCTTATCGTATCGCGCAGGTACAGTATCTGGTCGATGGTCTGGAAGAGATTGGCGTTGT
3890188	+	51162.3	primary,	P:gene_id "EG11005"; gene_name "tnaA";	AAGTTTAATTAATACTACAGAGTGGCTATAAGGATGTTAGCCACTCTCTTACCCTACATCC
3891174	+	1137.2	internal,	I:gene_id "EG11006"; gene_name "tnaB";	AGTTCGTTCTTTGGTGTCACGCTGGGGTTGTTCGATTATCTGGCGGACCTGTTTAAGATTG
3904532	+	2054.19	antisense,	A:gene_id "EG10115"; gene_name "bglF";	TACCGCTGGTTCGGTGATACCAAACAGACTCGTCAACGCCGCTGATCCCGCCACCACTTTT
3907826	-	40273.3	internal,	I:gene_id "EG10783"; gene_name "pstB";	TTGCGCGTGGTATCGCCATTCGCCCGGAAGTGCTGCTGCTCGACGAACCGTGTTCGGCGCT
3915151	-	72809.4	internal,	I:gene_id "EG11198"; gene_name "glmU";	TATGTTGAATAATGCTATGAGCGTAGTGATCCTTGCCGCAGGCAAAGGCACGCGCATGTAT
3915729	-	51879.2	internal,	I:gene_id "EG10100"; gene_name "atpC";	TGTCTGGCGGCATTCTTGAAGTGCAGCCTGGCAACGTGACCGTTCTGGCCGACACCGCAAT
3917447	-	40653.7	internal,	I:gene_id "EG10104"; gene_name "atpG";	CTGATTAAAGAGCTGCAGTTGGTATACAACAAAGCTCGTCAGGCCAGCATTACTCAGGAAC
3922387	-	134774	internal,	I:gene_id "EG10106"; gene_name "atpI";	TCTGTGTCGCTCGTGAGTCGAAACGTTGCTCGGAAGCTTCTGCTCGTTCAGTTACTGGTGG
3923737	+	1233.36	antisense,	A:gene_id "EG10375"; gene_name "mnmG";	TACCTGTTCTTGATGCGTTGCCTGGTAAGCGGGTGCTTACCAGGCATTTTTAATGCGTTAT
3927468	+	6671.26	internal,	I:gene_id "EG10091"; gene_name "asnA";	GGGCGAAGGGCTGTACACGCACATGAAAGCCCTTCGCCCCGATGAAGACCGTCTTTCTCCG
3928243	+	1556.64	antisense,	A:gene_id "EG11730"; gene_name "viaA";	TATCAAAGCGCCAGATATGATCGAAAATGCGCATGATGCCGGGTTTGCCGTGTGCCGACAT
3933644	+	34427.8	internal,	I:gene_id "EG10817"; gene_name "rbsD";	GAAACGTTGCTCACTCACCTTGAGCAGCTGCAAAAACACCAGGGAAATACCATTGAAATTC
3937163	+	1296.05	internal,	I:gene_id "EG10815"; gene_name "rbsB";	GCGAGAAAGTTCAGGCTAAGTATCCGGTTGATCTGAAACTGGTTGTTAAGCAGTAGTTTTA
3937278	+	107544	orphan		TAATATAAAGAAAAGCAGGGCACGCGCCACCCTAACACGGTGGCGCATTTTATGGACATCC
3941692	+	90002.2	orphan		CTGAGAAAAAGCAAAGCGGCACTGCTCTTTAACAATTTATCAGACAATCTGTGTGGGCACT
3947032	+	2449370	primary,	P:gene_id "EG30105"; gene_name "trpT";	ACCGGTCTCCAAAACCGGGTGTTGGGAGTTCGAGTCTCTCCGCCCCTGCCAGAAATCATCC
3950406	+	4690.92	internal,	I:gene_id "EG11270"; gene_name "ilvL";	TGATTAGCGTGGTGGTGATTATTATCCCACCGTGCGGGGCTGCACTTGGACGAGGAAAGGC
3959909	-	41033.9	orphan		TTTTCTCCCCTTGAGGGACCTGCGAAGCCCGGATTTTCCGGGCTTTTGCCATATATGTACC
3965375	-	60443.1	internal,	I:gene_id "EG10844"; gene_name "rhlB";	ATTATCTTCTCTCTCATCCTGCGATTGCCGATCGCAAGGTGAATCAGCCGCGTGCCTTAAT
3965470	+	1126.05	antisense,	A:gene_id "EG10844"; gene_name "rhlB";	GATAATGAAACGTTGACGTAAGAAACGCCATCGTTTTCCCGGTACCGGTTTGCGCCTGCCC
3965733	+	2263.24	orphan		ATAAAGTCAACCTTTAGTTGGTTAATGTTACACCAACAACGAAACCAACACGCCAGGCTTA
3966142	+	2620	orphan		GGAATTTCATGTTCGGGTGCCCCGTCGCTAAAAACTGGACGCCCGGCGTGAGTCATGCTAA
3966322	+	6201.61	internal,	I:gene_id "EG12428"; gene_name "rhoL";	TTGTCGTTTCAGTTCTGCGTACTCTCCTGTGACCAGGCAGCGAAAAGACATGAGTCGATGA
3967945	+	1397.8	internal,	I:gene_id "EG10840"; gene_name "rfe";	TTTTCTCTGAGAGCATGCATTGTGAATTTACTGACAGTGAGTACTGATCTCATCAGTATTT
3970120	+	1120.46	primary,	P:gene_id "EG11295"; gene_name "wzzE";	CGAAATAGCAACACTGCTGCGGTGAGCGCAAAGGCGCTCGCCGCTTATTCGAAGAGAATCG
3982585	+	37700500	primary,	P:gene_id "EG30042"; gene_name "hisR";	CCTGGATTGTGATTCCAGTTGTCGTGGGTTCGAATCCCATTAGCCACCCCATTATTAGAAG
3982811	+	3974115	primary,	P:gene_id "EG30068"; gene_name "proM";	AACTGGTTTGGGACCAGTGGGTCGGAGGTTCGAATCCTCTCTCGCCGACCAATTTTGAACC
3986585	+	55245.5	internal,	I:gene_id "G0-8873"; gene_name "glmZ";	ATGCCTCATCAGACACCATGGACACAACGTTGAGTGAAGCACCCACTTGTTGTCATACAGA
3986647	-	77058.4	primary, antisense,	P:gene_id "EG10434"; gene_name "hemY";,A:gene_id "G0-8873"; gene_name "glmZ";	CCGCCACAGTAGTTCCTTCTCACCCGGAGGCAAGCACCTCCGGGGCCTTCCTGATACATAA
3989314	-	66593.2	internal,	I:gene_id "EG10430"; gene_name "hemD";	TGAATGTTATCAACGATGCGCAATCCATTACGATGGTGCAGAAGAAGCGATGCGCTGGCAA
3990701	-	84415.4	internal,	I:gene_id "EG10429"; gene_name "hemC";	TTAAGAATTGCCACACGCCAAAGCCCACTTGCACTCTGGCAGGCACACTATGTCAAAGACA
3991232	+	3916.05	internal,	I:gene_id "EG10170"; gene_name "cyaA";	GAGACTGGATGCCATAAATCAATTGCGTGTGGATCGCGCGCTTGCTGCTATGGGGCCTGCA
3991346	+	7497.66	internal,	I:gene_id "EG10170"; gene_name "cyaA";	AATGCCGGGTTACCTTGATGGTAACGTTCCCAAAGGCATTTGCCTTTACACGCCTGATGAA
4001272	+	4006.64	internal,	I:gene_id "G0-10704"; gene_name " ";	ACACACCCAGTAGATACTGGCTCACTATCCTGTCATCCAGGATCAACTCCTAAGGCTATCC
4017235	+	1205.47	primary,	P:gene_id "EG11045"; gene_name "udp";	TGCTGTAATTCTCTTCTCCTGTCTGAAGGCCGACGCGTTCGGCCTTTTGTATTTTTGCGTA
4022287	+	1403.37	internal,	I:gene_id "G7808"; gene_name "tatB";	GCGAACTGCTATTGGTGTTCATCATCGGCCTCGTCGTTCTGGGGCCGCAACGACTGCCTGT
4024970	-	61964.1	antisense,	A:gene_id "EG11396"; gene_name "ubiD";	GTCGCGTAAATCGTTATATTTCATGGCGTCCATTGTAGCCTCTTAATCTGCGCCCATTATA
4027235	-	76678.1	antisense,	A:gene_id "EG10334"; gene_name "fre";	TGAATAACAGTTTAGTTGCCGTTCTTCCCGCCTGTCAGGGGCGGGTTTTTTTATATCTCAG
4032968	+	2580.95	internal,	I:gene_id "EG11484"; gene_name "yigZ";	TGTGAATATCATCAGTTAACCGGCATTGAAGCGTTGCTGGGGCAGTGTGACGGCAAAATTA
4037105	+	42116.5	primary,	P:gene_id "EG30084"; gene_name "rrsA";	GGTTGGATCACCTCCTTACCTTAAAGAAGCGTTCTTTGAAGTGCTCACACAGATTGTCTGA
4040636	+	2103630	primary,	P:gene_id "EG30070"; gene_name "rrfA";	CCGATGGTAGTGTGGGGTCTCCTCATGCGAGAGTAGGGAACTGCCAGGCATCAAATAAAAC
4042499	+	1482.8	internal,	I:gene_id "EG11831"; gene_name "rdoA";	ACCCGGATACCATCATGGACGCTCTGTTTGAGCATGGGATCCGGGTGGATTCCGGTCTTAC
4050007	+	36200.4	primary,	P:gene_id "EG30098"; gene_name "spf";	TTGGCTGAATATTTTAGCCGCCCCAGTCAGTAATGACTGGGGCGTTTTTTATTGGGCGAAA
4051237	+	5008.62	internal,	I:gene_id "G0-8874"; gene_name "csrC";	CAGGGTGTGTTGGCGGCCTGCAAGGATTGTAAGACCCGTTAAGGGTTATGAGTCAGGAAAA
4056428	-	614946	orphan		CAACGTGAAGTTTGTCAGCTATCTGTAGCCCATCTCTGCATGGGCTTTTTTCTCCGTCAAT
4056541	-	73569.9	orphan		CTCTGGCAGGCCTGGGATCGGTGGCAAGCACATCACGCCGGATGCGACGCAAATGCGTCTT
4076017	+	1222.2	internal,	I:gene_id "EG11850"; gene_name "yihX";	ATGCGCAAACCTGAAGCACGAATTTACCAGCATGTTTTGCAGGCGGAAGGTTTTTCACCCA
4085917	-	76678.1	orphan		TTACAAACCCTTCCTGGATGGAGGGAAATTGAGCCAATTCTGGACCTTTGCGGCCCCTTCC
4105857	+	1584.54	internal,	I:gene_id "G7816"; gene_name "cpxP";	TTGGGAGCAAATGATGCGCATAGTTACCGCTGCCGTCATGGCCTCAACGCTGGCAGTCAGT
4106379	+	5132.68	orphan		GTTTTCCTTGCCATAGACACCATCCCTGTCTTCCCCCACATGCTGTGGGGGTTTTTTTTAT
4107350	+	1477.22	internal,	I:gene_id "EG11873"; gene_name "fieF";	TCGGATGTAATTATCCATCAGGACCCCTGTTCCGTCGTACCCAGGGAGGGTAAACGGTCTA
4108723	+	2625.57	orphan		ACAAAGCGCACTTTGTCAGCAATATGAGGCGGATTTCTTCCGCCTTTTTAATCCCTCAACA
4110703	-	72048.9	primary, antisense,	P:gene_id "EG11015"; gene_name "tpiA";,A:gene_id "EG10138"; gene_name "cdh";	CTAAACAGGCTTAAGTCTGACAGGTGCCGGATTTCATATCCGGCACTTACTTTCCTTAACT
4113600	-	50738.4	antisense,	A:gene_id "EG11877"; gene_name "uspD";	TCAAACGGTTGATAAATGAGTGATGATGACCACAGACAAGGAGGTCGCACTGCTCTTTTTG
4113796	+	1131.62	antisense,	A:gene_id "EG10628"; gene_name "fpr";	TCATATGGCCCGGTCGGCGACGTAAATGTTTCGTCATCTGCCGGGTCTCTTTCAGCAACTG
4118843	+	20168.3	antisense,	A:gene_id "EG11879"; gene_name "rraA";	GTGTAGGCCAACAGGTAACGCAGAAAAAAGGCACCTTGCGGTGCCTTTCTTATCATTCAAT
4122347	+	1381.06	antisense,	A:gene_id "EG11529"; gene_name "ftsN";	CCTTGGTTACGAATACAGAGTACAAACCCCGTACAAAAGTACGGGGCATAATGCAATTATA
4126990	+	3265.24	orphan		TATACTTTTAACATCGCGTGGTGTCTGGCGTTAGGGCTGGAAGAGCGACGCGGCCTTAAAC
4128471	-	100650	orphan		GCCGACAGGTGCATTACACGATGTCACGGTAACGCCTGTACGGTAAACTATGCGGGTTTAC
4132448	+	1505.11	orphan		TGGTTAGTTTATATTTGCAGTCCGGTTTGCTTTGCATACCGGATTTTCTTTTTCTTACCAT
4159345	-	54987.4	primary, antisense,	P:gene_id "EG11428"; gene_name "sthA";,A:gene_id "EG10681"; gene_name "oxyR";	TTTTAAAACTTTATCGAAATGGCCATCCATTCTTGCGCGGATGGCCTCTGCCAGCTGCTCA
4161634	+	1194.31	internal,	I:gene_id "EG11394"; gene_name "fabR";	CCGAAGCAATGGTGACAATTGTCTTCAGTGCGGGTGCCGAGGCGTTGGACGTCGGCGTCGA
4168233	+	55733.4	primary,	P:gene_id "EG30085"; gene_name "rrsB";	GGTTGGATCACCTCCTTACCTTAAAGAAGCGTACTTTGTAGTGCTCACACAGATTGTCTGA
4168488	+	4091.64	primary,	P:gene_id "EG30032"; gene_name "gltT";	GGGGACGCCACTTGCTGGTTTGTGAGTGAAAGTCGCCGACCTTAATATCTCAAAACTCATC
4168633	+	11312	orphan		AGTCTCTCAAATTTTCGCAACACGATGATGAATCGAAAGAAACATCTTCGGGTTGTGAGGT
4172639	+	2133.61	internal,	I:gene_id "EG11205"; gene_name "murB";	TGCGTCTGCCAAAAGAGTGGCAACCTGTACTAACGTATGGTGACTTAACTCGTCTGGATCC
4175463	+	54767450	primary,	P:gene_id "EG30102"; gene_name "thrU";	AACTGACTTGTAATCAGTAGGTCACCAGTTCGATTCCGGTAGTCGGCACCATCAAGTCCGG
4177212	+	9292.57	orphan		AGGGCATCATTTGATGCCCTTTTTGCACGCTTTCGTACCAGAACCTGGCTCATCAGTGATT
4179777	+	9597.8	orphan		CGAATGAAGGAAGCCAACGCCGTCACAAGCTGAATAGCGACGGATAGAAAAGATTTGTTCG
4180997	+	4962.66	orphan		CTGAGAAATCAGGCTGATGGCTGGTGACTTTTTAGTCACCAGCCTTTTTGCGCTGTAAGGC
4190323	-	441420	primary, antisense,	P:gene_id "G0-9388"; gene_name "sroH";,A:gene_id "EG11429"; gene_name "yjaZ";	AATACCAGAGATAATTCTCTGGCGAAACCCACCTTAAGGTGGGTTTTGTTATTTTGAGGGC
4190584	-	527736	orphan		AGGAATGTTGTCCAGGGCGAAAAGCTTCTTCCTCGTTTCGCCCTGCCTTTCTTAAAAATTC
4196185	-	1923035	orphan		GATCCGCGGAACCTGATCAGGCTAATACCTGCGAAGGGAACAAGAGTTAATCTGCTATCGC
4196549	-	81687.3	internal,	I:gene_id "EG11738"; gene_name "rsd";	CAGTATTTATGAGCGCATTCTTCATAAGCTGGAAGGCAACGGGCAACTCGCGCGCGCCGCG
4196790	-	51879.2	internal,	I:gene_id "EG11738"; gene_name "rsd";	CAGTTTTTGAATACAAACTTGCGGAGTCAATCATGCTTAACCAGCTCGATAACCTGACGGA
4200251	+	1663.96	orphan		TGTATGCAGGAGAGTGCTATTCTGGCATTTCCGTCGCACTCGATGCTTAGCAAGCGATAAA
4200605	+	27872.2	internal,	I:gene_id "EG11917"; gene_name "yjaH";	ATTGCGTGGCAGTGAACAGTTTTAACGAAGGGGTGGTTTCACCCCTTTTGTCTTTCTGGCG
4208031	+	17577.6	orphan		GTGCGCTAAAGCGCGTCGCAACTGCTCTTTAACAATTTATCAGACAATCTGTGTGGGCACT
4210035	+	32868.3	orphan		AGTCTCTCAAATTTTCGCAACACGATGATGAATCGTAAGAAACATCTTCGGGTTGTGAGGT
4215503	+	11946	internal,	I:gene_id "EG10023"; gene_name "aceB";	CGGATCCATGACGAGGAGCTGCACGATGACTGAACAGGCAACAACAACCGATGAACTGGCT
4215731	+	3819.89	internal,	I:gene_id "EG10023"; gene_name "aceB";	GGAAACAGCTTCCATTCGCGATGCTGATTGGAAAATTCGCGGGATTCCTGCGGACTTAGAA
4218019	+	1499.53	internal,	I:gene_id "EG10022"; gene_name "aceA";	GTGTGAAACCTCCACGCCGGATCTGGAACTGGCGCGTCGCTTTGCACAAGCTATCCACGCG
4218571	+	1114.89	orphan		GCCGTTGCCGAACGTAGGCTGGATAAGGCGTTTACGCCGCATCCGGCAATTCTCTGCTCCT
4218832	+	1109.31	internal,	I:gene_id "EG10026"; gene_name "aceK";	GAGCAACTGCGCTGCATTACTAACGGCCAAAGTACGGACGCGGCATTTTTACTACGTGTTA
4218963	+	56452.6	internal,	I:gene_id "EG10026"; gene_name "aceK";	GTACTGTCGGTTATTTGACCACCGCTCGCTTACTCCCGAGCGGCTTTTTATCTTTAGCTCT
4223542	-	80546.7	internal,	I:gene_id "EG10491"; gene_name "iclR";	CCCGCCGTTGCCACCGCACCAGCGACTGGACAGGTTCAGTCTTTAACGCGTGGCCTGAAAT
4233316	-	96021.4	orphan		CGCAGTCGGGCGTTTCGCAAGTGGTGGAGCACTTCTGGGTGAAAATAGTAGCGAAGTATCG
4250533	+	3893.74	orphan		CACAGTGCTGATTTTGCAACAACTGGTGCGTCTCCTGGCGCACCTTTTTTTATGCTTCCTT
4256745	-	45282.8	antisense,	A:gene_id "EG10224"; gene_name "dgkA";	CGCGTCCACATCCAGCCAGCAGGCGATGACCACCGCCAACAATACCGCTACGCCTTCCTGA
4257185	+	2790.01	internal,	I:gene_id "EG10533"; gene_name "lexA";	GCAACAAGAGGTGTTTGATCTCATCCGTGATCACATCAGCCAGACAGGTATGCCGCCGACG
4259238	+	2688.27	internal,	I:gene_id "EG11928"; gene_name "yjbJ";	AGAAAAGTGAACGTACTCTCATTCACAACCTAACGATGAGGTCTTGATTATGAATAAAGAT
4259483	+	62261	primary, antisense,	P:gene_id "EG11928"; gene_name "yjbJ";,A:gene_id "EG11929"; gene_name "zur";	AATATCGCTGGTAATTAATCCCTCCTGCCCGACGTGTACAAGGATGTACGCCCTCTTAACG
4259941	-	104139	internal,	I:gene_id "EG11929"; gene_name "zur";	ACAACGCAGGAGTTATTAGCGCAGGCTGAAAAAATCTGCGCGCAGCGTAATGTGCGCCTGA
4263246	+	1222.2	antisense,	A:gene_id "EG11492"; gene_name "qor";	TACAGCCGAACTATAAAAAGAAAGGGCTTCCCAGGTGGAAGCCCTATTTCTTTTATGGAAT
4268311	-	99509.8	antisense,	A:gene_id "EG11040"; gene_name "tyrB";	CGACGACAGTTTAATTTCACTGCAGGCTGGGTAGCTCCAGCCTGCTTTCCTGCATTACATC
4270279	+	2240.93	internal,	I:gene_id "EG11935"; gene_name "yjbQ";	GAGCAGCACATGTGGTATCAAAAGACGCTCACGCTTAGCGCCAAATCTCGTGGGTTTCATC
4273892	-	61583.8	orphan		TAATTAACCGTTTGTGATCGCCGGTAGCACCATGCCACCGGGCAAAAAAGCGTTTAATCCG
4277382	-	43001.2	internal,	I:gene_id "EG10958"; gene_name "soxS";	CTCCCCAACAGATGAATTAACGAACTGAACACTGAAAAGAGGCAGATTTATGTCCCATCAG
4286960	-	116191	internal,	I:gene_id "EG11448"; gene_name "acs";	CCAATACCCTGCTCGAGCTGGGCATTAAAAAAGGTGATGTGGTGGCGATTTATATGCCGAT
4330351	+	3361.39	orphan		ACACTGGTAGGGTAAAAAGGTCATTAACTGCCCAATTCAGGCGTCAACTGGTTTGATTGTA
4330484	+	1222.2	orphan		CCCTTTTGCGGCCGTCGCGCTGATTTTTCTGGCGTTTGCGGAAATGGGCCAACTCTGCGAG
4332116	+	1708.59	internal,	I:gene_id "G0-10707"; gene_name "pmrR";	CTTAATCTCTGACGCGCATACTCTCCTCCAGGTTAACGGAGGAGAGTGCAATGAAAAACCG
4352488	+	4646.29	orphan		CAAAGAATGGGCAGAGAGCGCGTTTTTTTGTCCCAAGTCATCCCCTTTACTGAGCAAAAAA
4362551	-	2266140	primary,	P:gene_id "EG30064"; gene_name "pheU";	AGGGGATTGAAAATCCCCGTGTCCTTGGTTCGATTCCGAGTCCGGGCACCAAATTCATATA
4365438	-	39893.1	primary,	P:gene_id "EG11225"; gene_name "dcuA";	GTAGCTTCATGCTGTAATGATCAATCGCGGGGCGTTCACGCCCCGCTTTCTTTCCCGCCGA
4367011	-	108008	internal,	I:gene_id "EG10095"; gene_name "aspA";	AACGGTGACATCGTGGGTAAAATCTGTGCCGAAACCGGTAAGAGTGTACGTGAAGTCGTTC
4368149	-	51879.2	internal,	I:gene_id "EG10095"; gene_name "aspA";	TATTCCTGAATTTGTTCGCGGTATGGTAATGGTTAAAAAAGCCGCAGCTATGGCAAACAAA
4368394	-	302017	orphan		TATGATCTCGGGTATTCGGTCGATGCAGGGGATAATCGTCGGTCGAAAAACATTCGAAACC
4373349	+	1227.78	antisense,	A:gene_id "G7835"; gene_name "yjeJ";	ACCAACGATCACGTTATCAGTCATTTCAGGCTGGATGGCTCCAGCCTCGCATTAGCAAAGA
4376301	+	2314.78	primary,	P:gene_id "EG12099"; gene_name "efp";	TCTCGCGTGAAGTAATGCGGTTGTGGTGCGGCCTGCAGGCTGCACCATCACTTATTCAGGT
4376735	+	145410	primary,	P:gene_id "G0-9562"; gene_name "ecnB";	AAAGCGCAGCAATAAGCAATAACGGTACGACAGCTGTGTCGTGCCGTTTGTTTTTTCTGCG
4378960	-	345018	primary,	P:gene_id "EG10333"; gene_name "frdD";	CTAACGCATCGCCAATGTAAATCCGGCCCGCCTATGGCGGGCCGTTTTGTATGGAAACCAG
4392435	+	6602.98	primary,	P:gene_id "EG30038"; gene_name "glyV";	ACGACCTTGCCAAGGTCGGGGTCGCGAGTTCGAGTCTCGTTTCCCGCTCCAAAATTTGAAA
4397182	+	4533.4	internal,	I:gene_id "EG11363"; gene_name "amiB";	CGAAATACATAAACGTCGACCAGAACACGCCAGCCTTGGCGTTCTGCGCTCGCCGGATATC
4399885	+	1578.96	internal,	I:gene_id "EG10595"; gene_name "miaA";	ATCAGGTGCATCAGTTCGCCATCGCCCCGGCGAGCCGTGAACTGCTCCATCAACGCATTGA
4400333	+	1312.79	internal,	I:gene_id "EG10438"; gene_name "hfq";	AGAGAATGGCTAAGGGGCAATCTTTACAAGATCCGTTCCTGAACGCACTGCGTCGGGAACG
4400650	+	12794.8	orphan		TTCGGGCTGTTTTTTTACACGGGGAGCCAGCGATCCTGCGTTCCCCGCTGATCTATTTAGA
4406132	+	1120.46	orphan		TCCTCGCTTTTTTCCTTCCCCGAACTGAAATAAATTAGCGACACAGCTTGTGGCTGGTTTA
4416378	-	442114	orphan		ACATAGTCAGCTTTACATTGCTTTGCGTCCCTATGCGTTTACCTGTGCACAATAAATTACC
4416567	-	111496	internal,	I:gene_id "G7852"; gene_name "bsmA";	GGGTTACAGCGAATAGGTAGCGTAAGCACGATGGTTCGGGGTTCTCCGGATGACGCATTAG
4425121	+	19428.3	internal,	I:gene_id "EG10905"; gene_name "rpsF";	TCGGCTGACCCAGACAGGAGGCTGAATAATCCGTAAGGAGCAATTCGATGCGTCATTACGA
4428652	-	96021.4	internal,	I:gene_id "G7864"; gene_name "ytfB";	GAACTAAAACCAACCCTGGAGAAAGTCTGGCACGCGCCGGACAATTTTCGCTTCATGGACC
4429862	+	3921.63	orphan		ACTAAAGGCCGTAGAGCCTGAACAACACAGACAGGTACAGGAAGAAAAAAACATGGTAGAT
4433045	-	43381.5	internal,	I:gene_id "G7867"; gene_name "ytfF";	TTCCTGAACTTTCTTCTGACAGATCAATGGATGCCAGTAATGATTAGCGGCGTGCTGTACG
4437542	+	1312.79	primary,	P:gene_id "EG10043"; gene_name "cysQ";	CTAAATTCAGATGGCAGAAACAGTGTATTTCCTGATTCTGCCATCCTGATTTCTCCCAACC
4439860	+	91115.8	antisense,	A:gene_id "G7873"; gene_name "ytfL";	TAAAAAGTGCTATGCAGTAATAAGACGGCTCCTGATTCAGGAGCCGTTGATGTTTCTGGGG
4441214	-	70081.6	primary, internal,	P:gene_id "G0-10706"; gene_name " ";,I:gene_id "G7873"; gene_name "ytfL";	TTAATCAACTTCCCCTTCCGAGGATCTGGCCTGAAAGGTCGGATAAGATATGTTAAACAGT
4442753	-	44902.5	antisense,	A:gene_id "G7874"; gene_name "tamA";	TCGCCCTGGTTCAGTACCGTGCCAATAGCCGGGCGAGTATCGAGCAATTTCAAATAGTCTT
4451058	+	1505.11	internal,	I:gene_id "EG12518"; gene_name "ytfR";	ACCGCGTCTTATCATGCCTACTGGGAGCACGCTTTACACCGGGGGAAACCATGACGACCGA
4467576	+	2540.57	orphan		CGTTTTAACGTCCCTGCTCAGCTTTATTACCTTCAGGTAAGGCTTCGCCACGCCTGAAGAC
4470490	-	77058.4	primary,	P:gene_id "G7877"; gene_name "ridA";	CTGTTCGTCGCTAATCTTGATGGAAATCCGGGCTATCATGCCCGGATTAAGTCTGATGACA
4485964	-	51499	orphan		ACGAAAGCTTGCAATTCTATCTGTAGCCACCGCCGTTGTCTTTAAGATTCAGGAGCGTAGT
4486156	+	10949.6	orphan		TGAGTATAATTATCTTAGCGACGATTTCGACGACTCAAGAGAATAAATGACGTTTAAGCCA
4496489	+	83832700	primary,	P:gene_id "EG30053"; gene_name "leuX";	CAAAATCAACCGTAGAAATACGTGCCGGTTCGAGTCCGGCCTTCGGCACCAAAAGTATGTA
4499867	-	44902.5	antisense,	A:gene_id "G7896"; gene_name "yjgW";	GCTTTACTTTTCTGGCCTTGGGCTGTCGGTCAGCGACAGTGCCAATCCTGTTCATCATTAT
4500343	-	190522	orphan		ACAGCCTCCAGTACAGTGTCTTCCCTGAGCCGGACACTGATTTATGACTATGAGCAGAACC
4502006	+	2031.88	orphan		GGGCATGACAATGTCAAACAGTCAAAGATTGTGGCGTTGACGGTCAGTCTTGGGGACAAAA
4502127	+	1606.85	antisense,	A:gene_id "G7900"; gene_name "insG";	CATCTTGGTTCTGTAATGCCAGTCAGTTAAGCAACTGACTGGCTCTTTTTCGGGGCTGTGG
4518479	+	1408.95	orphan		TGCTATTATTGACATCCTCACTGCCCTAAAGGATGGGGATTTCGGTAATGCTGCCAACTTA
4528112	+	278129	primary, antisense,	P:gene_id "G0-10609"; gene_name "ryjB";,A:gene_id "G7915"; gene_name "sgcQ";	GAAGGGTTATTGCTCTTTGCCGGGGATAAGCGCTCTGCTTATCCCCATCTTATCGGCGTAT
4534045	-	130079	internal,	I:gene_id "G0-10473"; gene_name "topAI";	GTTTGCACGTTTTGCACATGATGATTAAATAGGTTCTTCAGTATGAATTTATCCCGTCAGG
4540846	+	1590.12	orphan		TTAACAGTTGCTACTCCATTTAAGTTCACTCAGAAGAACTGGTCCACTTACGTTAGTTATT
4541591	+	2150.35	primary,	P:gene_id "EG10309"; gene_name "fimB";	GCGTCACGCTGTTTTATAGAGATAGTTGAGATACCAGGGATGGTGTTAAAAACTACATTAT
4543708	+	18238.2	primary,	P:gene_id "EG10308"; gene_name "fimA";	CAATAACCTACCCAGGTTCAGGGACGTCATTACGGGCAGGGATGCCCACCCTTGTGCGATA
4572314	+	1312.79	orphan		TCATTTTTATCTAAAATTGATTTATAGTATCGACCTGAAAAAATAGTTGTTGCCGCCTGAG
4579912	+	170544	primary,	P:gene_id "G0-10610"; gene_name "symR";	GTGATTGTGATTAGCGATGCGGGTGTGTTGGCGCACATCCGCACCGCGCTAAATACCTGTA
4606076	-	787133	primary, antisense,	P:gene_id "EG30051"; gene_name "leuV";,A:gene_id "G0-10474"; gene_name "yjjZ";	GTTAGTGTCCTTACGGACGTGGGGGTTCAAGTCCCCCCCCTCGCACCAATTATCTTTACTT
4606193	+	1397.8	antisense,	A:gene_id "EG30051"; gene_name "leuV";, gene_id "EG30047"; gene_name "leuP";	TCTACCAATTCCGCCACCTTCGCACAGTCATCTTACTTTTTTTGATATCGCCTCGTTTGGT
4606200	-	686408000	primary,	P:gene_id "EG30047"; gene_name "leuP";	GGTGTTAGTGTTCTTACGGACGTGGGGGTTCAAGTCCCCCCCCTCGCACCAAACGAGGCGA
4611232	+	6060.81	orphan		CGTTCAATGCGTAGATATCAGTATCTAAAGCCGTCGATTGTCATTCTACCGATATTAATAA
4611381	+	1290.47	orphan		CTATTCAGCAATGCAACCTCGTGTTGCCAGGCTCAAATTACGAGCAAACATACAGGAATAA
4612044	+	2252.09	primary,	P:gene_id "EG11391"; gene_name "osmY";	CTAAGTAATTCGTCGTAATTCGTCCTCCCGAACTTTGTCGGGAGGCGCGATGTGCACCACA
4612345	+	1397.8	orphan		AGACCATTAAGAAAATTTTATCCAAAGCCAGTCCAGCGGACTGGCTTTTGCGGTTTTAGCG
4635102	-	108834	internal,	I:gene_id "EG11366"; gene_name "rob";	TATTCGTGCTCGTCGTTTGTCGAAATCGGCGGTCGCACTACGCCTGACTGCGCGTCCGATT
4640223	-	40273.3	internal,	I:gene_id "EG10061"; gene_name "arcA";	GAGTTGGTAACACGCAACACGTTGAAAAGTATTTTCGAAGCGGAAGGCTATGATGTTTTCG
4640415	-	231175	antisense,	A:gene_id "G7954"; gene_name "yjjY";	AGCTAATGATGTTGTTGACGTTGATGGAAAGTGCATCAAGAACGCAATTACGTACTTTAGT

## Sheet: M63 0.4
Supplementary file 1. 3´ ends identified by Term-seq
3´ end position	strand	Term-seq AVG read count	classification	details	3′ end region
267	+	11296.2	primary,	P:gene_id "EG11277"; gene_name "thrL";	ACCACCATCACCATTACCACAGGTAACGGTGCGGGCTGACGCGTACAGGAAACACAGAAAA
3860	+	889.975	internal,	I:gene_id "EG11000"; gene_name "thrC";	ATCAGGGGCTGTTTTTTCCGCACGACCTGCCGGAATTCAGCCTGACTGAAATTGATGAGAT
9230	+	5361.77	primary,	P:gene_id "EG11556"; gene_name "talB";	GATCTGCTGTAATCATTCTTAGCGTGACCGGGAAGTCGGTCACGCTACCTCTTCTGAAGCC
17007	+	165203	primary, antisense,	P:gene_id "G0-9581"; gene_name "sokC";,A:gene_id "EG10373"; gene_name "mokC";	GCATATAGGAGGCCTCGGGTTGATGGTAAAATATCACTCGGGGCTTTTCTCTATCTGCCGT
17501	+	1092.65	internal,	I:gene_id "EG10652"; gene_name "nhaA";	AGTAAAAACGATCTATTCACCTGAAAGAGAAATAAAAAGTGAAACATCTGCATCGATTCTT
18696	+	1092.65	primary,	P:gene_id "EG10652"; gene_name "nhaA";	ATCAGTTTGACAGGACGGTTTACCGGGGAGCCATAAACGGCTCCCTTTTCATTGTTATCAG
20763	-	443296	orphan		CGCCAATTTGCTGAAGCTTTGTGAAAAAGCCCGCGCAAGCGGGTTTTTTTATGCCTGCTGC
25325	+	749.009	internal,	I:gene_id "EG10548"; gene_name "lspA";	TCTGGGCAGCAAATACCTGATCCTCCAGAACTTTGCTCTGGGGGATACGGTCCCGCTGTTC
29275	+	1026.56	orphan		AACACATTTAATTTATTGATTATAAAGGGCTTTAATTTTTGGCCCTTTTATTTTTGGTGTT
34117	+	2828.43	orphan		CGCTAATTTGATCGAATAACTAATACGGTTCTCTGATGAGGACCGTTTTTTTTTGCCCATT
52491	-	26752.3	internal,	I:gene_id "EG10691"; gene_name "pdxA";	CACATCAGTGGACCACGGCACCGCGCTTGAACTGGCGGGACGTGGCAAAGCCGATGTCGGC
53259	-	25338.5	internal,	I:gene_id "EG10691"; gene_name "pdxA";	TTGTGCCGATGCCACTCTCCTTACCAACCGGGCAGCGATGCTCGGTTTGCCGCTCACCCTC
54365	-	43047.9	internal,	I:gene_id "EG10985"; gene_name "surA";	GGATCAGGCGATTGCTAACATCGCGAAACAGAACAACATGACGCTGGATCAGATGCGCAGC
63352	-	97493.6	orphan		ATTTTGATGCGTGACGAATGCTTTGCCATCCAGTACCATAGCGCCCTTTCCATTCCTGGAC
75517	-	1004044	internal,	I:gene_id "G0-9381"; gene_name "sroA";	TACCCGTCGAACCTGATCCGGATAACGCCGGCGAAGGGATTTGAGGCTCCTTCTCAAGTCC
77593	+	1832.89	primary,	P:gene_id "G0-9941"; gene_name "sgrS";	AGTATTGGTGTAAAATCACCCGCCAGCAGATTATACCTGCTGGTTTTTTTTATTCTCGCCG
78740	-	63865	antisense,	A:gene_id "EG11754"; gene_name "setA";	TTTAACCTTTGCGGTTAAAAATAATGCGACAACAGAAATAACCGCAATTACCCAGTAGACA
83641	-	761298	internal,	I:gene_id "EG11280"; gene_name "leuL";	CTTTATCGGTCTACTACTACTAAACGCATCTTCTTTGCGCGGTAGACGAGTGAGCGGCATC
92658	+	130700	internal,	I:gene_id "EG10341"; gene_name "ftsI";	GCTTATATCCTCAAAAACAACGGTGGTCTGACATAGAGAGGGCCACCTTCTCTTTCGGCTA
104642	+	700.448	internal,	I:gene_id "EG10339"; gene_name "ftsA";	TGGGTGTCTGCGTCGTCGATATCGGTGGTGGTACAATGGATATCGCCGTTTATACCGGTGG
106673	+	3326.53	internal,	I:gene_id "EG10265"; gene_name "lpxC";	AAAGTCACCCTGACGTTACGCCCTGCGCCGGCCAACACCGGGGTCATCTATCGTCGCACCG
107550	+	819.491	orphan		TCGACTGGCAAATCTGGCACTCTCTCCGGCCAGGTGAACCAGTCGTTTTTTTTTGAATTTT
107811	+	1233.62	internal,	I:gene_id "EG11087"; gene_name "secM";	TCTCTTATTAGGGATGGTTGCGGCGAGTTTAGGTTTGCCTGCGCTCAGCAACGCCGCCGAA
114526	+	753.393	primary, antisense,	P:gene_id "EG10422"; gene_name "guaC";,A:gene_id "EG11798"; gene_name "hofC";	AACAACCTGTAATCTCCCAACGCTGGCGTGGAGCAACACGCCAGCGTTATCCCATCCCACT
120140	-	69988.5	primary, antisense,	P:gene_id "EG10084"; gene_name "aroP";,A:gene_id "EG10042"; gene_name "ampE";	AAAAGCGCATTAATCTCTCTACGCCCTCACCCGTACAGGGTGAGGGCAATAATCTTTACAC
122234	+	2127.99	internal,	I:gene_id "EG11088"; gene_name "pdhR";	CGAAAAACTCCCACCGGAACGCGAACTGGCAAAACAGTTTGACGTCTCCCGTCCCTCCTTG
122968	+	17786	orphan		CAACTAAACGTAGAACCTGTCTTATTGAGCTTTCCGGCGAGAGTTCAATGGGACAGGTTCC
127851	+	2335.05	orphan		TCCCCAGGAGCTTACATAAGTAAGTGACTGGGGTGAGGGCGTGAAGCTAACGCCGCTGCGG
131587	+	9129.07	orphan		CCCTACAAACTGCTGTCTCACAGGAGCGTGAAGAGAATCGCCTGCCGCACTATGACAATGA
134269	+	2308.41	orphan		AGCGCACGCGCTGCGCATAAACGACACAATGCCCGGTGAATGAGATTCCCGGGCATTTTTT
134752	-	36171.7	primary, antisense,	P:gene_id "EG10962"; gene_name "speD";,A:gene_id "EG12605"; gene_name "yacL";	ATGCCAGCTGTTTAACGGCTCTGGCGGAGCTCCCAGGCTCCGCCAGATTTATTTACTTCTG
136766	-	33816.8	internal,	I:gene_id "EG11089"; gene_name "yacC";	AACGGCAGTTTTTGTCTTTCTGAAGAACGATTGTGGTTACCAGAACTTACCTAACGGGCAA
141974	-	111434	primary, antisense,	P:gene_id "EG12319"; gene_name "can";,A:gene_id "EG20098"; gene_name "hpt";	ACGCCAACCACAAATAAAAATGCCATGCCGGATGCAACACATCCGGCAACTTCACACTTAC
146276	-	68010	primary, antisense,	P:gene_id "EG11747"; gene_name "panD";,A:gene_id "EG11749"; gene_name "yadE";	ACAGGTTGCTTGATTGTTATCCCTGCGGCTGGTTACTCACCAGCCGCGACATCGTCTCCAG
160097	-	231062	internal,	I:gene_id "EG11362"; gene_name "gluQ";	TACAGCCGTTCCATCACGTTTACCACAGGCGGGAAATGCTCCCGCCTTATTTTTTGTTCAA
161708	+	753.393	antisense,	A:gene_id "EG12330"; gene_name "thpR";	TGTGGATGAAACGGACGATTGCTTTGAAAACAACCGCTGCGGGCAGCCTGTGAACGGAGCA
164636	+	986.765	orphan		CGCGCACGTTCACCCTCACCCTAACCCTCTCCCTCAAGGGAGAGGGGACCGATCGAGCACA
176994	+	2550.89	primary, antisense,	P:gene_id "EG12332"; gene_name "erpA";,A:gene_id "EG12333"; gene_name "yadS";	TTAGTATCTAATCTGTTGTTCATGTGCCGGATAAACTATCCGGCACATCTTCTCTCTTCAA
178423	-	46155.6	primary, internal,	P:gene_id "EG11090"; gene_name "mtn";,I:gene_id "EG12334"; gene_name "btuF";	GAAACTTGCACATGGCTAAGTCACTGTTCAGGGCGCTGGTCGCCCTGTCTTTTCTTGCGCC
178796	-	69612.1	internal,	I:gene_id "EG11090"; gene_name "mtn";	CGGCATTTGGTTATGAATACGGTCAGTTACCAGGCTGTCCGGCAGGCTTTAAAGCTGACGA
183649	-	61321.9	antisense,	A:gene_id "EG12335"; gene_name "cdaR";	GACGGTTAATTCGGGCATTCCCCTCTACCCTTCGGGCTGAGGGGAATGAGCCAGCGCCGCC
185087	-	219664	primary,	P:gene_id "EG10207"; gene_name "dapD";	CGTACCATCGACTAAAAGTATGCACACGGGCAGCACGACGCTGCCCGATTTTTTTGCAGGG
189839	+	10486.1	internal,	I:gene_id "G0-8895"; gene_name "tff";	GGCACATATTCCGGGGTGCCCTTTGGGGTCGGTAATATGGGATACGTGGAGGCATAACCCC
190800	+	7084.72	orphan		GACCAGGTAGTACACGTTTGGTTAGGGGGCCTGCATATGGCCCCCTTTTTCACTTTTATAT
194844	+	34211.6	orphan		AAGTAGTTGGCTTTATAAGGTCAGATATGCCGTGGTTTTACACGGCTTTTTTTTGTATAGG
196856	+	964.843	internal,	I:gene_id "EG12436"; gene_name "rseP";	TGCCTTCAATAATAAATCTGTCGGCCAACGAGCGGCGATTATTGCCGCAGGTCCGGTTGCA
201053	+	3348.45	internal,	I:gene_id "EG10316"; gene_name "lpxD";	GCAGTTGGATGCAGAACTACACGGTGATGGCGATATCGTCATCACCGGCGTTGCGTCCATG
201608	+	1101.43	internal,	I:gene_id "EG10316"; gene_name "lpxD";	ACAGATTGGTCGCGTAATTATTGGCGATCGCGTGGAGATCGGTGCCTGCACAACCATCGAT
202063	+	1511.17	orphan		CGCCAAACTTTACGGCCTGTCTCATTCTTACGATTGCGGCAGGCCGTGTTATTATTGTCGT
202315	+	947.307	internal,	I:gene_id "EG11284"; gene_name "fabZ";	CCCTGGAAAACCGATTTTCCCGGGTGTGCTGATTCTGGAAGCAATGGCACAGGCAACAGGT
203409	+	757.778	internal,	I:gene_id "EG10546"; gene_name "lpxB";	GCGTCCATTAACGATTGCCCTGGTCGCCGGAGAAACCTCCGGCGATATCCTGGGGGCCGGT
214116	-	59440	internal,	I:gene_id "G372"; gene_name "yaeP";	CTTGCATCCACGGTTAAGTCAGAGTGCTGACAGGAGGGCATGTGGAAAAATATTGTGAGTT
220053	-	163337	orphan		TGTTTCCACAATTTGTAATATCATTCAGGACGGGCGCTTGCCCGTCTTGTCATTTTTACAA
222856	+	881.207	internal,	I:gene_id "EG11736"; gene_name "gmhB";	ACATGCCTTATTAAGGAGCTATAAAAGGTGGCGAAGAGCGTACCCGCAATTTTTCTTGACC
223766	+	6040.3	orphan		CAAGAGTGAACACGTAATTCATTACAAAGTTTAATTCTTTGAGCATCAAACTTTTAAATTG
225751	+	50403.8	orphan		AGTCTCTCAAATTTTCGCAACACGATGATGGATCGCAAGAAACATCTTCGGGTTGTGAGGT
229007	+	4463.03	primary,	P:gene_id "EG30024"; gene_name "aspU";	TGCCTGTCACGCAGGGGGTCGCGGGTTCGAGTCCCGTCCGTTCCGCCACTTATTAAGAAGC
233782	-	115392	internal,	I:gene_id "EG10246"; gene_name "mltD";	AGTCAGGCACGATGGATGGACGATGGGACGTCTATCGCGCCAGATGGTGACTTGTGGGCTT
237009	+	2302795	primary,	P:gene_id "EG30025"; gene_name "aspV";	CTGCCTGTCACGCAGGGGGTCGCGGGTTCGAGTCCCGTCCGTTCCGCCACTATTCACTCAT
240856	+	885.59	primary, antisense,	P:gene_id "G6104"; gene_name "ivy";,A:gene_id "G6105"; gene_name "fadE";	ATTTTAAATAATTAGCGGATAAAGAAACGGAGCCTTTCGGCTCCGTTATTCATTTACGCGG
246130	-	32214.8	internal,	I:gene_id "G6109"; gene_name "yafQ";	AAAGCGTCATAAGGATATGAATAAATTGAAATATCTTATGACGCTTCTTATCAATAATACT
246481	-	34381.4	internal,	I:gene_id "G6110"; gene_name "dinJ";	AATAAATATACAGCACAGGAGATACCCCAATGGCTGCTAACGCGTTTGTTCGCGCCCGAAT
255715	-	121230	internal,	I:gene_id "EG10695"; gene_name "pepD";	CCTGTGACCTGCAATACTGTTTTGCGGGTGATCGACAAGGAGACTTAACGTGTCTGAACTG
258782	+	832.646	internal,	I:gene_id "EG11092"; gene_name "crl";	ACGTGAAACCGGCACCGGAAGTGCGTGAATTCTGGGGCTGGTGGATGGAGCTGGAAGCGCA
259042	+	2273.34	primary, antisense,	P:gene_id "EG11092"; gene_name "crl";,A:gene_id "EG10729"; gene_name "phoE";	AAGTTAACGGCGTGAGTGAAATGTGCCGGATGCATCACATCCGGCAATATTCATTAAAACT
262946	+	14898150	primary,	P:gene_id "EG30104"; gene_name "thrW";	AGCGCATTCGTAATGCGAAGGTCGTAGGTTCGACTCCTATTATCGGCACCATTAAAATCAA
292318	+	903.131	antisense,	A:gene_id "G6148"; gene_name "yagK";	AATTTTTTGAAACAATACAAATAAGGCCTTCTCACTGAGAAGGCCATTACCGACTTACAGT
295417	-	29860	internal,	I:gene_id "G6151"; gene_name "yagN";	AAGAGGTTGTCGAGTATCTCAAAGGAACATACTCAGCTCTTCGCAAGTCTGTCGCATGCGC
296555	+	815.107	antisense,	A:gene_id "G6152"; gene_name "intF";	TGAGCAAACTAGCCAATGGTCCAGCCGAAGTCGGGCCTTGGCCTCTTTTTTTACTTTCGCC
303835	+	1370.2	antisense,	A:gene_id "G6159"; gene_name "ykgJ";	TTGTTACCCCTGAAAAACGAAGCCCCGCTATTATCGCTGGCGGGGCAGTGCAATTAATTAT
304212	-	95326.9	orphan		GTTCCCCAGCCAACCGCGGTACGTTCTTACATACGATGTACCGCTGTTCTCTTTACGATTT
310322	+	1083.88	antisense,	A:gene_id "G6164"; gene_name "ecpA";	CGCCCAGTACGCCGTTGGCGGTATCGATCATCACGGTATCGCCAGTTTTTTCGACTGCCGC
312325	+	749.009	internal, antisense,	I:gene_id "G6166"; gene_name "ykgL";,A:gene_id "G0-10434"; gene_name "ykgO";	ATATCCCCAGGAAAATTAATGTTGGTGTTATAAACACACCAACATTAATCCGATCTGATTA
324603	-	86095.9	orphan		GACAATGACCGGGAAGGGAACCCGTTTTCAGGAATGGATGCCTGTCTTTTTCACTGTAAAT
329307	-	24397.5	internal,	I:gene_id "EG10111"; gene_name "betI";	CGCTGATGAATGGAGTGGCGAAAATGCCCAAATTGGGGATGCAGTCGATCCGGCGCAGACA
344011	+	744.624	orphan		ACATATTAACTTCGCTCTCCACTTAACTTTTTAGTTAAGGAGAGCGAAATAATATCAAAGT
345390	+	1312.87	orphan		TTAGCTCATCAGGAAGAGCAGACGACAACCAGGATTGTTGTATGGTACGGGGTTCGAGGCC
346858	+	10437.2	antisense,	A:gene_id "G6195"; gene_name "prpR";	ATCTATTGAAATTTATGCCGGATAAAGCGTTCGCGCTGCATTCGGCAGTTCAGCTTTTCAG
377696	+	1229.24	antisense,	A:gene_id "G6208"; gene_name "frmB";	ATTCATCTCCTGGCAGATCTTTTCAAGATTTGGAGTCCGCAGCTGTTCTGCGTAAAAATCA
401850	+	1026.56	internal,	I:gene_id "EG10727"; gene_name "phoA";	GACAAAAGCCCGGACACCAGAAATGCCTGTTCTGGAAAACCGGGCTGCTCAGGGCGATATT
403649	+	2216.01	primary,	P:gene_id "EG11401"; gene_name "psiF";	TGATACCTGATAGTGCTAACGGGTGAGCTACGAAAATGGCTCACCCGAAATATCATACTTC
404791	-	24962.1	primary, antisense,	P:gene_id "EG10769"; gene_name "proC";,A:gene_id "EG11257"; gene_name "dgcC";	ATCCTGATGACTTTCGCCGGACGTCAGGCCGCCACTTCGGTGCGGTTACGTCCGGCTTTCT
407205	+	6088.86	primary,	P:gene_id "EG11093"; gene_name "yaiA";	CCCTGACAAAGAGTGACCGCATCAGACTGCTCGGAAGGGATTCTGAGTGCCACTACAAGGG
408495	+	2537.73	primary,	P:gene_id "EG12159"; gene_name "yaiE";	TGTGCCGCTATCTGTAATTCCTCGCCTTCCCCTTGAACGGGAGGGCATTTTTCTGAAATAT
427356	+	806.34	internal,	I:gene_id "EG11096"; gene_name "yajC";	ATGCGGTAGCGGCAACGGGTGCACCGGCGCAAGGTAGCCCGATGTCTTTGATTTTGATGCT
427789	+	3568.67	internal,	I:gene_id "EG10938"; gene_name "secD";	GGATCCGGCTGTTCAGATCACTGGTGCGCGCGGAGTCGCCGCCAGTGAGCAAACGCTGATC
434622	+	2396.76	orphan		AAGGGAAGCAGCGCACGAAATATTATGCTAAAATCCGCCCCCCTGCGGGGCCATACTCGAA
435608	+	2616.98	orphan		ATCCAGGCCGGTAGATTCACGGAAGACCGTTCCATGATCGCCGGCCTTTTCTTTTTTACCT
445327	+	969.23	antisense,	A:gene_id "G6241"; gene_name "yajR";	CGCAGCAGGCAATTCGCCGCGTTTTTTATGCCTGACGAATTGCCTGTTCTATCTCAAAGCG
446773	-	62262.9	primary,	P:gene_id "EG10182"; gene_name "cyoE";	GTGTGGTAACAAAACCTCTCTATTAAAAAGGTGCTACGGCACCTTTTTTCTTAGCATTAGA
448497	-	31650.2	internal,	I:gene_id "EG10180"; gene_name "cyoC";	TCTGTTCTCTATCTTGTTTGCTACCTATGCCGTTCTGGTGAACGGCACCGCAGGCGGCCCG
451530	-	58026.2	internal,	I:gene_id "EG10178"; gene_name "cyoA";	GGATGGTTGTCATTATTTGCAGGCACTGTATTGCTCAGTGGCTGTAATTCTGCGCTGTTAG
452393	-	86660.4	internal,	I:gene_id "EG12183"; gene_name "ampG";	TCGGCCCCGTGGCGGGTTGGTTTGTTGAAGCACACGGCTGGTCGACATTCTATCTATTCTC
454868	+	4608.38	orphan		CCAGTATGTTGCTAAAGATTTTATGAAAAACGGCCTGCGGGCCGTTTTGTTTTGTCTGGAT
455736	-	31650.2	antisense,	A:gene_id "EG11003"; gene_name "tig";	CGGGAAGGTCACGTCGATGGTGAACTCTTCGCCAGCTTTGTGGCCTTTGATACCGTCTTCA
457838	+	1030.94	internal,	I:gene_id "EG10159"; gene_name "clpX";	CGGTTCCGGTAAAACGCTGCTGGCTGAAACGCTGGCGCGCCTGCTGGATGTTCCGTTCACC
458758	+	3013.57	antisense,	A:gene_id "G0-8861"; gene_name "sraA";	TTCCCATACAATTAGTTAACCAAAAAGGGGGGATTTTATCTCCCCTTTAATTTTTCCTCTA
461784	+	14032.2	orphan		CAGTGGGGATGTGACGAAGTTCAAGGGCGCATCTACTGATGTGCCTTTTTTATTTGTATTC
463858	+	1105.81	orphan		AAATGCGTTGCAGCTGTAACAAGAAAAGGTCGCTTTCGCGGCCTTTTCCATTTCTGAACAT
468269	+	1101.43	primary,	P:gene_id "G6246"; gene_name "cof";	TCCCCCGAATAACGAGATCCCTTCCAGCACCGGGCAATTGCCCGGTTTTTTTTGCGTTGAA
476561	+	7041020	primary,	P:gene_id "EG30027"; gene_name "ffs";	GCCAAGGCAGATGACGCGTGTGCCGGGATGTAGCTGGCAGGGCCCCCACCCATTTCTGCCT
478552	-	51902.7	internal,	I:gene_id "G6252"; gene_name "pdeB";	CTGGTCGGCCTTATTTCGGGAGTACTGATTCTTTCAGTATTGCTGCCTGTCGGCTTAAGCA
479823	-	48322.2	internal,	I:gene_id "G58"; gene_name "maa";	TCGGCAGATGAGACGTTATCTCGCGATCGCCTGCGCGCTCGTCAGCTTATTCACCGATACA
480307	-	32214.8	primary, internal,	P:gene_id "EG12429"; gene_name "tomB";,I:gene_id "EG10439"; gene_name "hha";	AATCCTGCGAGTTTATCTTGTTAGAATTATTACAACCATAGGTAGAAGTATGTCCGAAAAA
480636	-	45967.3	internal,	I:gene_id "EG12429"; gene_name "tomB";	GACATGATATCGCACAGCTTAAGTTTCTCTGTGAAACCCTGTATCATGACTGCCTTGCAAA
489903	-	226826	antisense,	A:gene_id "G6255"; gene_name "mscK";	CAACGCGCACTTTGTTAGCAATCTCGGGGCAACTAAATGTTGCCCCCTTTCGTTTTTACCC
491387	+	942.918	orphan		AAGGTTAAACAACTGTTACTTTTGATACGTTTAAAACGCGCCGTGAGTACCACCGTAACAA
497939	+	3603.74	orphan		CACAAGCAAACTTATCAGCAATCTCAGGCCGGATATTCATTCGGCCTTTTACAAAAACCTC
506602	+	1370.2	primary, antisense,	P:gene_id "EG11060"; gene_name "ushA";,A:gene_id "EG12454"; gene_name "ybaK";	GTGAGCTGGCAGTAATCCGAAAGTGCCGGATGTTTGCATCCGGCACAATGCTTAATCGCGG
507287	+	955394	primary, antisense,	P:gene_id "G0-9382"; gene_name "chiX";,A:gene_id "G6258"; gene_name "ybaP";	AAAAATGAAATTCCTCTTTGACGGGCCAATAGCGATATTGGCCATTTTTTTAGCGCAACAT
508771	+	837.033	orphan		GAGCACCATTGCCTGATGCGACGCTTACGCGTCTTATCAGGCCTACAAACCTGTGCCTGAA
530080	+	1854.82	orphan		TGTTTTGGATAAGGATTCGACACTCATATCAAAACCGGTAACTCTCAACCTTTCAAGGCCA
533862	+	7948.06	primary,	P:gene_id "G6276"; gene_name "allR";	AAAGCACATCCATAATGTCTGTCGCATCCCGCTCTGCGGAGCGGGTTTTTTTGACAAAATT
553873	-	73096.1	internal,	I:gene_id "EG12666"; gene_name "lpxH";	TGCAGATCTTCATCTCTGCGTGGAAGAACCGGCGATCACCGCCGGTTTTCTGCGTTTTTTA
556627	-	25526.7	primary,	P:gene_id "EG12879"; gene_name "ybcJ";	TACAGGTTGTTGCCTGATCCCTTTCCCGGCCTGTATCAACAGGCCGGTTCTCTTTTCAGAC
564799	+	10951165	primary, antisense,	P:gene_id "EG30014"; gene_name "argU";,A:gene_id "EG10507"; gene_name "intD";	AACGACCTTCTAAGTCGTGGGCCGCAGGTTCGAATCCTGCAGGGCGCGCCATTACAATTCA
572350	+	1859.2	orphan		AACACGGCATAATTATGTCACCGGAGCCTGAACAACTCCGGTGACTTCTGCGCTAAACGGG
574366	-	66408	antisense,	A:gene_id "G6307"; gene_name "ybcQ";	CTGTTATATATTACCCTTTATTTTTGGGGGCGTCTCAACGCCCCATTTTTAATAATTTTTA
584632	-	394211	primary,	P:gene_id "EG10673"; gene_name "ompT";	TAAGAACGCCAACTAAAATTTCCCCGAGGTGAAAATCGCCCCGGGGAATAACTAGCCATTT
585366	-	45779.2	internal,	I:gene_id "EG10673"; gene_name "ompT";	AAGGTGCAATTAATTGGGATTTGATGCCCCAGATATCTATCGGGGCTGCTGGCTGGACAAC
604740	-	33816.8	primary,	P:gene_id "EG50005"; gene_name "nfsB";	TCACCTTAACCGAAGTGTAATTCTCTCTTGCCGGGCATCTGCCCGGCTATTTCCTCTCAGA
607736	-	1364445	orphan		GTTTGGAGTGGCAGCCCCAGGGTTGATAGAAATATCTCCTGGGGCTTCATCTTTCCAGACC
610126	-	31462	orphan		ATCTTGCCAATTCAATATATTGCAGGACCATGTAGGCCTGATAAGCGTAGCGCATCAGGCA
622152	-	298792	internal,	I:gene_id "EG10296"; gene_name "fepD";	CATGGAAGTTCGTATGTCTGGTTCTGTTGCCGTGACACGCGCCATTGCCGTGCCCGGATTG
624567	-	50300.6	orphan		GTTCCCCTCACCCTAACCCTCTCCCCAAAGGGGCGAGGGGACGGATTGTGCGCTTTGTCGA
624680	-	243213	orphan		AGCATTATTGATGGATTCGCATAAGCGCAATGTGATGTCCTGCGCCGTTCTGCCCCCTCTC
624944	+	757.778	internal,	I:gene_id "EG10261"; gene_name "entC";	TCACTGGCTGAGGAAGTACAGCAGACCATGGCAACACTTGCGCCCAATCGCTTTTTCTTTA
629952	+	2066.26	internal,	I:gene_id "EG10167"; gene_name "cstA";	ATCAGGGAAATACCTCGTCTGGACAGTGCTCTCTGTAATGGGAGCATTTGCTCTGGGATAC
638796	+	1502.4	orphan		CCAAAGGGTAGTTCAGATTACACGGTCACCTGGAAAGGGGGCCATTTTACTTTTTATCGCC
639668	+	8697.07	orphan		GAAATACTTCGGAAATTCACCTAATTCTTCGGGTGCTGCGGCACCCGATTTTCTTCCCCGC
657545	+	42179.2	primary, antisense,	P:gene_id "EG12179"; gene_name "cspE";,A:gene_id "EG12209"; gene_name "crcB";	TCTGTAAGATACGTCAGCAAGAATTCAAAACCCGCTTAATCAGCGGGTTTTTTTTGGTCTT
660111	-	33628.6	internal,	I:gene_id "EG11306"; gene_name "lipA";	TGGCCCTTATCCCGGTTAAAAACGTGGCAACAGAGCGCGAAGCCCTGCTGCGCAAGCCGGA
660220	-	29295.3	orphan		ATCTATTGAATTGAAACGCTTTCCTTCGTAATTCGCAACTGGAACACGCACGCTATGAGTA
662339	-	41257.7	primary,	P:gene_id "EG11592"; gene_name "ybeD";	TGGTTCTGTAACTCGCTTCTCCGTTACCCGGCTCCTGGTCGGGTAACTCCCCTCTCCTCGC
664101	+	1753.64	antisense,	A:gene_id "EG10854"; gene_name "rlpA";	ACTTTGTTAACGTCATTTACAGAAATTGACACATCAGATGCCTGCTTTACGCTACTGCGCG
671542	-	29860	internal,	I:gene_id "EG11412"; gene_name "holA";	ACCCGGAACAACTCCGCGCGCAGCTCAATGAAGGGCTGCGCGCGGCGTATCTTTTACTTGG
675562	+	5419.1	antisense,	A:gene_id "G6351"; gene_name "ybeQ";	CGCACAGCAATAAAGAGAATATGGGCCGAATGAAATTCCCCGGCCCTTGTTTTTATCTCTA
675677	+	1634.6	antisense,	A:gene_id "G6351"; gene_name "ybeQ";	CTGAACTTTACGATACAGGTCGAGAGCCTGTCGGAGATCGACAGGTCTTCCTTCTCCGTAG
686719	+	964.843	antisense,	A:gene_id "G0-9383"; gene_name "sroC";, gene_id "EG12661"; gene_name "gltJ";	TAAATCTACTCCAGAAAAAAGAGGGTAGCAGCGTTAACTGCTACCCTCGAAGATTGTTACC
696428	-	1280425	primary,	P:gene_id "EG30031"; gene_name "glnX";	CGGATTCTGATTCCGGCATTCCGAGGTTCGAATCCTCGTACCCCAGCCACATTAAAAAAGC
696963	-	80612750	primary,	P:gene_id "EG30052"; gene_name "leuW";	TAGGTTCTGGCGCCGCAAGGTGTGCGAGTTCAAGTCTCGCCTCCCGCACCATTCACCAGAA
701370	-	33816.8	internal,	I:gene_id "EG10636"; gene_name "nagC";	CGCGGGCTGATCAAAGAAGTTGATCAGCAGGCCTCCACCGGGGGCCGCCGCGCTATCTCCA
705969	+	744.624	orphan		GCGTCGCATCCAACAATGACAAGCGGTGGAGATCTTCTCTGCCGCTTTTTTTTTCATCAAT
710187	+	6150.57	antisense,	A:gene_id "EG10359"; gene_name "fur";	TTTTCTTATTTCCCTTGCATAAAAAAGCCAACCCGCAGGTTGGCTTTTCTCGTTCAGGCTG
710411	-	27505.1	internal,	I:gene_id "EG10359"; gene_name "fur";	TGACGACGCTGGTATCGTCACCCGCCACAATTTTGAAGGCGGTAAATCCGTATTTGAACTG
710532	-	38526.5	internal,	I:gene_id "EG10359"; gene_name "fur";	TCCTGGAAGTTCTTCAGGAGCCGGACAACCATCACGTCAGTGCGGAAGATTTATACAAACG
710645	-	50677	internal,	I:gene_id "EG10359"; gene_name "fur";, gene_id "G0-10580"; gene_name "uof";	GTCACTTCTTCTAATGAAGTGAACCGCTTAGTAACAGGACAGATTCCGCATGACTGATAAC
733551	+	1427.54	internal,	I:gene_id "EG10848"; gene_name "rhsC";	GGGCCAGGTAAAGCAAGTAATGATACAAAAGAAGCTGCTGGCCGTTGTGACCTCGTTGAAA
735465	+	815.107	orphan		TGACTTGTACGCCACAGGATGATTCCCAGTATCCAGGGATGGATACAAAGACAGCAAGTGA
739045	+	753.393	internal,	I:gene_id "EG11108"; gene_name "ybgA";	GCAGTAATGAATCTACAACGATTTGATGACAGCACCCTAATCCGTATCTTTGCCCTTCATG
753129	-	84117.4	orphan		GATTGCTAAGTTGTAAATATTTTAACCCGCCGTTCATATGGCGGGTTGATTTTTATATGCC
754647	-	54445.7	orphan		GTTATTAGTGGTAGACAAGTTTAATAATTCGGATTGCTAAGTACTTGATTCGCCATTTATT
755091	+	1691.93	orphan		GCAGTTATAGAAAGGACGCTGTCTGACCCGCAAGCAGACCGGAGGAAGGAAATCCCGACGT
758780	+	960.457	internal,	I:gene_id "EG10979"; gene_name "sucA";	TGGTTGGACTCTTCTTACCTCTCTGGCGCAAACCAGAGCTGGATAGAACAGCTCTATGAAG
762343	+	898.745	internal,	I:gene_id "EG10980"; gene_name "sucB";	GGCGATGACGTGGTTTACCACAACTATTTCGACGTCAGCATGGCGGTTTCTACGCCGCGCG
765148	+	19425.7	antisense,	A:gene_id "EG11109"; gene_name "mngR";	CGAAGGGCTGTCGGTTTCGACATGGTTGGCCATCGTATGATGGCCTTTTTTGTGCTTATCG
779674	+	4529.13	internal,	I:gene_id "EG12854"; gene_name "cpoB";	ATTGAGTCTGTCGTTACTGGTTGGTATAGCGGCCCCCTGGGCCGCTTTTGCTCAGGCACCA
780434	+	5718.57	primary,	P:gene_id "EG12854"; gene_name "cpoB";	ATGTAATGCATAACACACGACCAGAAGTCGCATTATTTCTGGTCGTGTCGTGCGAATCATA
780634	+	31190.2	primary,	P:gene_id "EG30055"; gene_name "lysT";	ACTTTTAATCAATTGGTCGCAGGTTCGAATCCTGCACGACCCACCAATCGCTAAGGTGGAA
780842	+	111423	primary,	P:gene_id "EG30109"; gene_name "valT";	CTCCCTTACAAGGAGGGGGTCGGCGGTTCGATCCCGTCATCACCCACCACCGGGTCGTTAG
781146	+	9974.52	primary,	P:gene_id "G6389"; gene_name "valZ";	TCCCTTACAAGGAGGGGGTCGGCGGTTCGATCCCGTCATCACCCACCACTCGGGTCGTTAG
781652	+	889.975	primary,	P:gene_id "G6392"; gene_name "lysQ";	AGTTGACTTTTAATCAATTGGTCGCAGGTTCGAATCCTGCACGACCCACCAATGTAAAAAA
784891	-	29483.6	primary,	P:gene_id "G6394"; gene_name "ybgS";	AGTAACCCTGCAAAATAGCCAATAATGGGAGAGCGGAGTCTCTCCCTTTTAATTTTTCACT
785746	+	1643.37	internal,	I:gene_id "EG10079"; gene_name "aroG";	TTGCTGGAAAAATTCCCCGCTACTGAAAATGCCGCGAATACGGTTGCCCATGCCCGAAAAG
785904	+	753.393	internal,	I:gene_id "EG10079"; gene_name "aroG";	TCGCTTGCTGGCGCTGCGTGAAGAGCTGAAAGATGAGCTGGAAATCGTAATGCGCGTCTAT
786824	+	2819.66	antisense,	A:gene_id "EG11699"; gene_name "gpmA";	TGCTCCATTGTTAGCAACAAAAAAGCCGACTCACTTGCAGTCGGCTTTCTCATTTTAAACG
787768	-	31838.4	primary,	P:gene_id "EG11698"; gene_name "galM";	ATATCAGTTTATTGCTGAGTAATGTTACGCCCTCGTCATGAGGGCTTTATCTCATATTGTT
794828	+	1304.11	internal,	I:gene_id "G6396"; gene_name "acrZ";	AGAGTTATTAAAAAGTCTGGTATTCGCCGTAATCATGGTACCTGTCGTGATGGCCATCATC
794956	+	5621.78	primary,	P:gene_id "G6396"; gene_name "acrZ";	CCGGACAAAATCATTGATTCCCTGAATGCCCGCTTAGTCGGGCATTTTCTTTTTCTCAACT
795995	+	753.393	internal,	I:gene_id "EG10002"; gene_name "modB";	TGGGATCTTTTTTGCCTGGTTACTGGTGCGTTGCACGTTTCCGGGCAAAGCTCTGCTCGAC
807397	-	27505.1	primary,	P:gene_id "EG11238"; gene_name "ybhB";	GCGATGTTTAGTTAATCACTCTGCCAGATGGCGCAATGCCATCTGGTATCACTTAAAGGTA
817046	+	1965.09	internal,	I:gene_id "EG11595"; gene_name "moaA";	AGGGCGAAGGAAGAAATGACTTCGCCTCCCGTATCTGGAAAGGTGTACATGGCTTCACAAC
838863	-	25338.5	internal,	I:gene_id "G6413"; gene_name "ybiX";	GGCGCAGTACGCAGCCATCCACAAAACGGCTGGATGCGTACTGACCTTTCTGCCACGCTGT
839219	-	43047.9	primary,	P:gene_id "G6414"; gene_name "fiu";	ACAGCCAATATGCATTTCTGATTCAGATGTGGGGCGCAGGCCCCACTTTTTGGAGAAATTG
841454	-	27317	internal,	I:gene_id "G6414"; gene_name "fiu";	AGACAATTTCATTCGCTCACGTTCTTTGCCGGTCTTTGTATTGGCATCACGCCTGTGGCTC
845561	-	29295.3	orphan		CAGCAACCTGCTTAATATCCCTTCCTCCCTTTCACCCGAAAGGGAGGCACACCAGATTCCT
847200	-	42295.2	orphan		ACACCTGTAAAACGCACTGGCAGTTCCCTCTCCCCTATGGGGAGAGGATTAGGGTGAGGGG
848340	-	262901	orphan		CAGAACTTTAGTACCCGATAAAAGCGGCTTCCTGACAGGAGGCCGTTTTGTTTTGCAGCCC
848665	-	34757.8	internal,	I:gene_id "EG11415"; gene_name "dps";	TGGATGGCTTCCGCACCGCACTGATCGATCATCTGGATACCATGGCAGAACGTGCAGTGCA
848804	-	25526.7	internal,	I:gene_id "EG11415"; gene_name "dps";	GATGTCTCCGACAGCGAGAAAAAAGCAACAGTAGAGTTGCTGAATCGCCAGGTTATCCAGT
850295	+	1295.34	orphan		ATAATCTGGATGAATGACAGGGAAAACATGCGTAATACTTACGCAGTTCTCTGAAAAAGTG
850455	+	753.393	internal,	I:gene_id "EG12117"; gene_name "ompX";	TATATTTAAAACTTAGGACTTATTTGAATCACATTTGAGGTGGTTATGAAAAAAATTGCAT
850525	+	753.393	internal,	I:gene_id "EG12117"; gene_name "ompX";	CACTGGCCGCAGTTCTGGCTTTCACCGCAGGTACTTCCGTAGCTGCGACTTCTACTGTAAC
851011	+	1378.97	primary, antisense,	P:gene_id "EG12117"; gene_name "ompX";,A:gene_id "G6418"; gene_name "opgE";	TCTAATCACTTTGGTGATATAAAAAATCCGCCTCTCGGGGCGGATTTTTGTTTTTAAGGTT
852845	-	323943	primary, internal,	P:gene_id "G0-10715"; gene_name "mntS";,I:gene_id "G0-8881"; gene_name "rybA";	CAGCAAGATAAACCTTCCGATAAATAGCGGCGTCGCGGTACGCCGCTTCACTCCTGCTTTC
870014	-	260734	antisense,	A:gene_id "G6430"; gene_name "gsiB";	TATGCTGTCCAGTTTGGGCAATCCTGGCTGCCAGTAACCCGCGAATTTTTTCACCTTCACA
878664	+	898.745	primary,	P:gene_id "G6436"; gene_name "bssR";	ATGCTTGAGAAGGCCTGAAAACTAAGGGGGAGAAAGCGTCTCCCCCTTCATGTTTAAGTTT
887977	-	318480	primary, antisense,	P:gene_id "G0-8880"; gene_name "rybB";,A:gene_id "G6444"; gene_name "rcdA";	GTGGAGCCCATCAACCCCGCCATTTCGGTTCAAGGTTGATGGGTTTTTTGTTATCTAAAAC
889894	-	40881.3	orphan		TATATTGTTACTTTACTATCGTTTAGGTGCGCTGAATGAATCTGCGCCCTGAATTCTGGTA
890462	-	42859.8	primary, antisense,	P:gene_id "EG10417"; gene_name "grxA";,A:gene_id "G6446"; gene_name "ybjM";	AAAATCTGGACGCCTGATCGTCTGACAAGCCCTCGCGTTGAGGGCTTTACTGATTTTTTCT
899644	-	29860	antisense,	A:gene_id "G6449"; gene_name "rlmC";	TAAACAACGCGCACTTTGTCAGCAATCTGAAGCCGCACATGCGGCTTTTTTATTGCTTCAC
923210	+	14583.2	internal,	I:gene_id "G6463"; gene_name "clpS";	CCAAAGTGGCGATGGTGAACAAGTACGCGAGGGAGAATGAGCATCCATTGCTGTGTACGCT
926159	-	542952	orphan		ATGGGCGAAGAGAAAGAACGAGTAAAAGGTCGGTTTAACCGGCCTTTTTATTTTGTGATAT
926568	-	45214.6	orphan		GTTTATCTCACCGCTCCCTTATACGTTGCGCTTTTGGTGCGGCTTAGCCGTGTGTTTTCGG
932430	+	4524.74	orphan		ATGTTTACCGTGCTAGTGAAATCTACGTATGGCGTGGACAGACGCCATTCGTGATGTCGAT
933176	+	6220.73	orphan		ACTCCTGTTAATCCATACAGCAACAGTACTGGGGTAACCTGGTACTGTTGTCCGTTTTAGC
939447	+	1735.77	internal,	I:gene_id "EG10947"; gene_name "serS";	TCCCATTTAATTCGATAAGCACAGGATAAGCATGCTCGATCCCAATCTGCTGCGTAATGAG
944901	-	51902.7	primary, antisense,	P:gene_id "EG11241"; gene_name "ycaC";,A:gene_id "EG10234"; gene_name "dmsC";	ACGTTAACGAAGCAGAAATAAAAGAGAACCGGGGCCGAAACCCCGGTTGTTATGATTAGCT
947069	+	885.59	primary,	P:gene_id "EG11242"; gene_name "ycaD";	AATGAATTCAAGCAGAGTGTGAACTTACTGTTTCACACTCTGCTTTTTTGTTTCTTCTATC
951156	-	35795.2	orphan		TTTAGCGCGAGAGCCTTTTTTGTCAGCTATCTATACTTTAAGGTGACTGCCAAAACAGACT
954794	-	38714.7	orphan		TAATGATTAGTCTGAGTTATATTACGGGGCGTTTTTTTAATGCCCCGCTTTACATATATTT
961968	+	1079.5	orphan		AATGACAGCGGGTATGTTAAACAACCCCATCCGGCATGGAGCCAGGTGGACGTTAAATATA
963777	+	5220.81	orphan		AGGTTTCGTCCTGTAATCAAGCACTAAGGGCGGCTACGGCCGCCCTTAATCAATGCAGCAA
964165	+	2841.59	orphan		TTTTTACTCAAACTTGAACGAGAGAAAAGCACCTGTCGGGTGCTTTTTTCATTTCTCTAAT
971644	+	2127.99	primary,	P:gene_id "EG10519"; gene_name "kdsB";	GCTAATTTCACTTCACGACACTTCAGCCAATTTTGGGAGGAGTGTCGTACCGTTACGATTT
983125	+	696.062	internal,	I:gene_id "G6474"; gene_name "ycbK";	ATGGACAAATTCGACGCTAATCGCCGCAAATTGCTGGCGCTTGGTGGCGTTGCACTCGGTG
984479	-	61698.3	primary,	P:gene_id "EG10096"; gene_name "aspC";	CAGTGCTGTAAGCATTAAAAACAATGAAGCCCGCTGAAAAGCGGGCTGAGACTGATGACAA
984789	-	27128.8	internal,	I:gene_id "EG10096"; gene_name "aspC";	GCTTCTGTTGTTGCCACCATCCTGAGCAACGATGCGTTACGTGCGATTTGGGAACAAGAGC
985649	-	63488.6	internal,	I:gene_id "EG10096"; gene_name "aspC";	ACATTACCGCCGCTCCTGCCGACCCGATTCTGGGCCTGGCCGATCTGTTTCGTGCCGATGA
985841	-	1597690	orphan		GCACACCTCTTTGTTAAATGCCGAAAAAACAGGACTTTGGTCCTGTTTTTTTTATACCTTC
986188	-	27317	internal,	I:gene_id "EG10671"; gene_name "ompF";	CTGGCAGCGAACTACGGTGAAACCCGTAACGCTACGCCGATCACTAATAAATTTACAAACA
986412	-	38338.2	internal,	I:gene_id "EG10671"; gene_name "ompF";	ACTTCGCTGTTCAGTACCTGGGTAAAAACGAGCGTGACACTGCACGCCGTTCTAACGGCGA
986769	-	70364.9	internal,	I:gene_id "EG10671"; gene_name "ompF";	GTGGCAATGGCGACATGACCTATGCCCGTCTTGGTTTTAAAGGGGAAACTCAAATCAATTC
987050	-	24962.1	orphan		ATGCCTGCAGACACATAAAGACACCAAACTCTCATCAATAGTTCCGTAAATTTTTATTGAC
990303	-	77993.9	internal,	I:gene_id "EG10742"; gene_name "pncB";	ACACAATTCGCTTCTCCTGTTCTGCACTCGTTGCTGGATACAGATGCTTATAAGTTGCATA
993275	+	1308.49	primary, antisense,	P:gene_id "EG10696"; gene_name "pepN";,A:gene_id "EG12358"; gene_name "ssuB";	ACTGGCTTGATAAATAACCGAATGGCGGCAATAGCGCCGCCATTCGGGGAATTTACCCCTG
1012729	+	823.876	internal,	I:gene_id "G6490"; gene_name "pqiA";	TGTACGGCAATCCTTCCTGCTGATGAACCCGTGTGCCCGCGTTGTAGTACCAAAGGGTACG
1015759	+	696.062	internal,	I:gene_id "EG50004"; gene_name "rmf";	CGAGGCATGAAGAGACAAAAACGAGATCGCCTGGAACGGGCACATCAACGTGGTTATCAGG
1015926	+	16067.8	primary, antisense,	P:gene_id "EG50004"; gene_name "rmf";,A:gene_id "EG10273"; gene_name "fabA";	GGCCTGATTCTGTCTCTTTAAAAAGAAACCTCCGCATTGCGGAGGTTTCGCCTTTTGATAC
1018977	-	24585.7	primary, antisense,	P:gene_id "EG10669"; gene_name "ompA";,A:gene_id "EG12855"; gene_name "matP";	CAGCCGCAGGCTTAAGTTCTCGTCTGGTAGAAAAACCCCGCTGCTGCGGGGTTTTTTTTGC
1019305	-	26564.2	internal,	I:gene_id "EG10669"; gene_name "ompA";	AGGTCAGGCTGCTCTGGATCAGCTGTACAGCCAGCTGAGCAACCTGGATCCGAAAGACGGT
1019558	-	27505.1	internal,	I:gene_id "EG10669"; gene_name "ompA";	AGTACGCGATCACTCCTGAAATCGCTACCCGTCTGGAATACCAGTGGACCAACAACATCGG
1019851	-	119252	internal,	I:gene_id "EG10669"; gene_name "ompA";	CCATGAAAACCAACTGGGCGCTGGTGCTTTTGGTGGTTACCAGGTTAACCCGTATGTTGGC
1020119	-	1003479	orphan		TAAGCCGAAGATATCGGTAGAGTTAATATTGAGCAGATCCCCCGGTGAAGGATTTAACCGT
1026525	-	52843.6	primary, antisense,	P:gene_id "G6497"; gene_name "mgsA";,A:gene_id "EG10426"; gene_name "helD";	CGCGGACCGTCTGAAGTAATATTGCACAGGTGGCAAACGCCACCTGTTTCTTACGGTTTTC
1030252	-	31838.4	antisense,	A:gene_id "G6502"; gene_name "yccX";	TGCGGCTCGCTGAGCACCCGTTCTACACGCGCAGAACGCGGGCCGCCACTCTTTAACCACT
1030711	-	96079.9	primary,	P:gene_id "EG11113"; gene_name "yccA";	TAATCTCACCCGCTAACACTTTCATAGCCTCGCTTTATGCGGGGCTTTGTTTTTTGTTACA
1031143	-	29671.8	internal,	I:gene_id "EG11113"; gene_name "yccA";	ATTATCTCCGCATTCGCCTTTACCGGTTTTCTGGGTTATATCCTCGGACCTATTCTGAACA
1031392	-	24962.1	internal,	I:gene_id "EG11113"; gene_name "yccA";	ACATCTGTCATAGAGAGTGACTCAATGGATCGTATTGTTAGTTCTTCACATGACCGTACAT
1031625	-	1245415000	primary,	P:gene_id "EG30093"; gene_name "serT";	AAACCGGCGACCCGAAAGGGTTCCAGAGTTCGAATCTCTGCGCTTCCGCCAAATAAGATAA
1041921	-	111719	antisense,	A:gene_id "EG10049"; gene_name "appA";	CTTCGTTTGTCATCAGCCTCAGAGCATTCAGGTAACTGAATGCTCTTTTTTATGCATTACA
1050653	-	167955	orphan		AGTCGTATTTCCAGAGGGGGATAGTTAACAATCTTATATTTCCCTCTGCGCGCCTTTCCTA
1051900	+	10359	internal,	I:gene_id "G6512"; gene_name "ymcE";	CGCCGCTGGATTTCACAAAATAATATCAGGCTCCCTCGTGGAGCCTTTTTTATATCTGCCT
1052279	+	1224.85	primary, antisense,	P:gene_id "G0-9662"; gene_name "gnsA";,A:gene_id "G6513"; gene_name "yccM";	AAAATAATGTGATTTTGTGAACATCACCCCGTGCGAGGTGATGTTCCGCTTGTTGCTAATT
1062547	+	1493.63	antisense,	A:gene_id "EG12194"; gene_name "cbpM";	CTGTAATCTTTGTAGACCGGTTAAGATGCGTCATCGCATCCGGCAAACACACATCACGGAT
1063700	-	36736.2	internal,	I:gene_id "EG12193"; gene_name "cbpA";	TCATGGGCGTGAAACCGACGGACGATCTCAAGACAATCAAGACCGCCTATCGTCGACTTGC
1085072	+	2916.45	internal,	I:gene_id "EG11734"; gene_name "phoH";	GATAATCAACGCGCCACCACTCGCGGAGTTTTCTCCTCCGGTAGTCATCTCGTCACTTTGC
1107697	-	45967.3	antisense,	A:gene_id "G6551"; gene_name "clsC";	ACGCCAGTCTGACCATAACCCGCTTCCAGAAACTGGTGGCGGGTTCTTTTTTGAGAATAAT
1120654	-	92971.9	primary,	P:gene_id "G6557"; gene_name "bssS";	TTAACATGACATGACCATCCACCCAAAAGGCACCTCACCGGTGCCTTTACCATTTCTGGGT
1120954	-	24962.1	internal,	I:gene_id "G6557"; gene_name "bssS";	CATTGAACCTCGAATAACGTTGTCTAGTAACACGAATTAGGGGGCCATGATGGAAAAAAAT
1141063	+	1105.81	orphan		TGGGTATGTTTTGTCTGCCTGCTCTGGGATCGCTGGGGCGGGCATTTTTTTGCCTATTTTG
1144526	-	36359.8	antisense,	A:gene_id "G6563"; gene_name "yceQ";	TTCTGGAGAGTAATACCCAGTCTGTTTCTTTGATAATTGCGCTGTTTTTCCGCATGAAAAA
1146757	+	2039.95	primary,	P:gene_id "G0-8862"; gene_name "sraB";	CAATGTGTGCGAATTATTGGCAAAAGGCAACCACAGGCTGCCTTTTTCTTTGACTCTATGA
1146911	+	1013.4	internal,	I:gene_id "EG11119"; gene_name "yceD";	AGGGTATCTATACCCCTGATCAGGTTGAGCGCGTCGCCGAATCCGTAGTCAGTGTGGACAG
1147348	+	1167.53	primary,	P:gene_id "EG11119"; gene_name "yceD";	AGCTTAAAGCGTAAGTAATTGGTGCTCCCCGTTGGATCGGGGATAAACCGTAATTGAGGAG
1147492	+	766.548	internal,	I:gene_id "EG10890"; gene_name "rpmF";	ACCAGCCTGTCTGTAGACAAAACTTCTGGTGAAAAACACCTGCGTCACCACATCACTGCCG
1147599	+	1167.53	orphan		CTGCGTGATGAAGCTTAGTGAGGATTTTCCCCAGGCAACTGGGGAAAGACCAAACCGGGCG
1147708	+	8925.75	internal,	I:gene_id "EG11437"; gene_name "plsX";	GGGATTTTGGCCCTTCCGTGACAGTGCCTGCAGCATTGCAGGCACTGAATTCTAATTCGCA
1151888	+	104281	primary,	P:gene_id "EG50003"; gene_name "acpP";	GCCACCAGGCGTAAGTGAACATCTCCAGGCGGTCGTTCGACCGCCTGAGTTTTATCTTTTT
1153228	+	969.23	primary,	P:gene_id "EG12606"; gene_name "fabF";	TAAGTTGTCATTTTCCACCCTTATAAAAGGTCCGCTTGCGGGCCTTTTTTCTTAGCTTTTA
1157917	+	1035.33	internal,	I:gene_id "EG10787"; gene_name "ptsG";	TTATGTTTAAGAATGCATTTGCTAACCTGCAAAAGGTCGGTAAATCGCTGATGCTGCCGGT
1159322	-	27505.1	primary, antisense,	P:gene_id "EG10306"; gene_name "fhuE";,A:gene_id "EG10787"; gene_name "ptsG";	ATCAATTCTGAATAACACCTGTAAAAAAGGCAGCCATCTGGCTGCCTTAGTCTCCCCAACG
1166025	+	1410	orphan		TGTTATTCTCAATAGCGAAGAACATTTTCATTGCTGTAACCTGTTGTTAATTAAGAGCTAT
1190575	-	54822.1	primary,	P:gene_id "EG11314"; gene_name "purB";	GCTGAAATAAACCTCGTATCAGTGCCGGATGGCGATGCTGTCCGGCCTGCTTATTAAGATT
1193724	-	38526.5	internal,	I:gene_id "EG11344"; gene_name "mnmA";	AATGTCTGAAACCGCAAAAAAAGTAATCGTCGGCATGTCCGGCGGTGTCGATTCCTCCGTT
1195100	+	1577.27	orphan		GTATCGCAGGACGCAAACGCATATGCAACGTGGTGGCAGACGAGCAAACCAGTAGCGCTCG
1195238	+	1312.87	internal,	I:gene_id "EG10489"; gene_name "icd";	CGTTCCTGAAAATCCGATTATCCCTTACATTGAAGGTGATGGAATCGGTGTAGATGTAACC
1196422	+	6674.65	primary,	P:gene_id "EG10489"; gene_name "icd";	AATGCCGTAGTTTGTTAAATTTATTAACGGGAGCGTAACGCTCCCGTTGTTTTTTGTTAGG
1201195	-	34193.2	internal,	I:gene_id "G6586"; gene_name "ymfH";	GTCTTGGCGGTACCAGTTTTTTCCTTAGTCCTTTCTGGTACCGCCCTTTTTACAAAACAGA
1201423	-	285136	orphan		TGTGAGAACTCCAGCATACCACCGAGCCTGAAGTGGTGAAAAGACAGGCACATAACAGCTA
1201911	+	898.745	antisense,	A:gene_id "G6588"; gene_name "ymfJ";	TAAACACGGCTCACCTTCTCTCCATTGCATGGCAGAGGGGTGAGTGTGTTAGCCATGAAAT
1203751	-	50541800	antisense,	A:gene_id "G6591"; gene_name "ymfL";	AGAAGCAATCGACGCCACGACGCCCGGAGCTGCACACTCGCGGGCGTCATTACTTTCTGAA
1218619	-	56612.3	antisense,	A:gene_id "G6608"; gene_name "pdeG";	GATCCAATACACAATCCAGAATTCGGGTTGATTCTGGGTCTGCGTTTACGCGGCCAACGAA
1224225	-	50300.6	orphan		CGCTGTAAAAGCGCATTTATCTTCAAGGCAGAGTTATCTCTGCCTTGAGTTTTTCATCCCT
1226099	-	40504.9	orphan		CATGCCTTATAGTCTTCGGAACATCATCGCGCGCTGGCGATGATTAATAGCTAATTGAGTA
1226224	+	960.457	orphan		AAGTCACCCTCCCATTTATTCAGAGTAAAAGTCTATTCTGTGATAAATGGCGCTGATTCAT
1242058	-	27128.8	internal,	I:gene_id "G6620"; gene_name "cvrA";	TTATATAAGAGACAGCGTAATCAGGAGTAACCGACCGTTGGATGCCACAACAATAATTAGC
1252968	-	43800.7	antisense,	A:gene_id "G6628"; gene_name "dhaR";	TCACTCTGATGTATCAGAAATCGTTTCTGTCTTTCATACCCGGCGCTTAAACTGCCCTGCA
1256636	-	29671.8	orphan		CATGAAGAGCGCAAAAGTATATAAAATCCACGCAATTGCGTGGATTTTTCATTTCACCGAG
1258823	+	6683.07	internal,	I:gene_id "EG11533"; gene_name "ychH";	AAGTTCCGGAGGTGACATATGAAACGCAAAAACGCTTCGTTACTCGGTAACGTGCTCATGG
1260887	-	24585.7	primary,	P:gene_id "EG10774"; gene_name "prs";	CGAACACTAATCGAACCCGGCTCAAAGACCCGCTGCGGCGGGTTTTTTTGTCTGTAATATC
1261962	-	47757.6	orphan		AGTTTCGGTGACAACGTCACCTTGTTCCAGACGTTGCATCGCGCTCTTTAATACACCGCCT
1263775	+	1167.53	internal,	I:gene_id "EG10427"; gene_name "hemA";	AGCACTCGGTATCAACCATAAAACGGCACCTGTATCGCTGCGAGAACGTGTATCGTTTTCG
1269388	+	7476.93	internal,	I:gene_id "G0-9603"; gene_name "rdlA";	TAGCCCCCGTTCTGTTGTCAGGTTGTACCTCTCAACGTGCGGGGGTTTTCTCTTTCCAGCA
1269895	+	1418.76	internal,	I:gene_id "G0-9606"; gene_name "rdlB";	CTATTCTTGAAGTGTCTGGTTTCAAGATTAGCCCCCGTTCTGTTGTCAGGTTTTACCTCTC
1270430	+	1572.88	internal,	I:gene_id "G0-9608"; gene_name "rdlC";	CTATTCTTGAAGTGTCTGGTTTCAAGATTAGCCCCCGTTTTGTTGTCAGGTTTTACCTCTC
1287242	-	2340030	primary,	P:gene_id "EG30108"; gene_name "tyrV";	AAATCTGCCGTCATCGACTTCGAAGGTTCGAATCCTTCCCCCACCACCATCACTTTCAAAA
1287359	-	39091.1	orphan		CCGAAGGGTGAGGAGCGAAGCGACGAATAATCCTTCCCCCACCACCATCTCAAGCATTACC
1287535	-	45967.3	primary,	P:gene_id "EG30106"; gene_name "tyrT";	AATCTGCCGTCATCGACTTCGAAGGTTCGAATCCTTCCCCCACCACCATAATTCACCACAG
1287663	-	43047.9	orphan		CTCAACGTAACACTTTACAGCGGCGCGTCATTTGATATGATGCGCCCCGCTTCCCGATAAG
1289157	+	1101.43	antisense,	A:gene_id "EG12119"; gene_name "ychJ";	CTACCACAGGGACAAAGCTGAGACACAAATAATCTCCCTGGAAACAATAACGGCGTATTAA
1292458	-	91558.3	orphan		TCTTTTGTAGATTGCACTTGCTTAAAATCCCGCCAGCGGCGGGATTTTTTATTGTCCGGTT
1292898	-	40504.9	internal,	I:gene_id "EG10457"; gene_name "hns";	CCCAATATAAGTTTGAGATTACTACAATGAGCGAAGCACTTAAAATTCTGAACAACATCCG
1294198	+	1039.71	orphan		GAATTTCTTTACTGACAGGGTGAGCAGGGCACTTTTATCCTGTCAGTTCGTTTTACGCACT
1295324	-	100225	orphan		ATCCTTAAACTGAGGCACTATAACGGCTTCCACAACAGGGAGCCGTTTTCTTATGCCACTT
1298003	-	25150.3	internal,	I:gene_id "EG10031"; gene_name "adhE";	TGCCAGTTTCACTCAAGAGCAAGTAGACAAAATCTTCCGCGCCGCCGCTCTGGCTGCTGCA
1298255	-	204315	orphan		CCTGGAAGTGACGCATTAGAGATAATAACTCTAATGTTTAAACTCTTTTAGTAAATCACAG
1299498	+	1621.44	orphan		AATTGAAATGATATTATTAATTCCACTGCCTTTGGTAGAGGAAAGTGCTAAGGAAGGTGCG
1300818	+	1361.43	orphan		AGCCAATCTCTATTTGATTGAATTGAAAGATGTTTGTTAAGGCATGGATGCAAGCTATAGA
1302852	+	1317.26	primary,	P:gene_id "EG10674"; gene_name "oppA";	GTGAAGCACTAATGGCAATACGTGGGGCAGGAGTGTCCTGCTCCACGGTGTCTGATTTTTA
1308963	-	25150.3	antisense,	A:gene_id "G0-8891"; gene_name "yciY";	TTTAAAGACGGAAGAGTAAACTTATTGGGCACCGCAATGGTGCCCAGTACATTTAGATATT
1308992	+	14680.4	primary, antisense,	P:gene_id "G0-8891"; gene_name "yciY";,A:gene_id "EG11606"; gene_name "kch";	TTGCGATCTACAATATCTAAATGTACTGGGCACCATTGCGGTGCCCAATAAGTTTACTCTT
1310520	-	45402.8	primary,	P:gene_id "EG11607"; gene_name "yciI";	GAATAGAGATTCAATATTTAAGGGCACGGTTTTTGCAACCGTGTTCTTGTTTGGCCTTTCC
1314669	-	24585.7	primary, antisense,	P:gene_id "EG11125"; gene_name "yciE";,A:gene_id "EG11124"; gene_name "ompW";	AATACCCTTTATACCATGTCCTTATTGACCCCGTATATTACGGGGTCGTTTTTGTGCGGAA
1315788	-	86472.1	orphan		ATATCAGCTGATAAAGATAATTGCATCTGCGGGCCGTATGGCTCGCAGTGATTTCACTGGA
1316383	-	57929.7	primary,	P:gene_id "EG11024"; gene_name "trpA";	GCGGCGACGCGCAGTTAATCCCACAGCCGCCAGTTCCGCTGGCGGCATTTTAACTTTCTTT
1322971	-	35983.4	orphan		ACCATGCGTAAAGCAATCAGATACCCAGCCCGCCTAATGAGCGGGCTTTTTTTTGAACAAA
1333823	+	876.823	orphan		TTTTATTATTAAATCGTATTAGTCACCCGCCAGGTGTGACGAAAAAACGATGTTCTGATGG
1337745	+	1445.07	internal,	I:gene_id "EG11325"; gene_name "acnA";	GAATTAACGTCACACGATCCGATACCTACGGTTGGCAGGAGGACTCAACCTATATTCGCTT
1339157	-	79407.8	internal,	I:gene_id "EG11331"; gene_name "ribA";	TATGGCAAAATAAGCCAATACAGAACCAGCATTATCTGGAGAATTTCATGCAGCTTAAACG
1343547	-	37489	primary,	P:gene_id "G6638"; gene_name "yciT";	ACCATTTCCCTTCTCTACGGATGATTTGCAGTTTGGCAAATCATCCGCTCTAAGATGATTC
1350208	-	118687	primary,	P:gene_id "EG11528"; gene_name "fabI";	TGAAATAATCGTTCTGTTGGTAAAGATGGGCGGCGTTCTGCCGCCCGTTATCTCTGTTATA
1361446	+	10141.8	internal,	I:gene_id "G6645"; gene_name "puuD";	GATCTTCTGAGCATGGCGATAATTAATGCCGCACTCGAAAGGCGCATCCCCATTTTCGCCA
1388306	-	114165	internal, antisense,	I:gene_id "G6660"; gene_name "tpx";,A:gene_id "EG11042"; gene_name "tyrR";	AATCACCACCGAGCCGGATTACGAAGCAGCTCTGGCTGTACTGAAAGCATAATTTAATATG
1390559	-	27317	internal,	I:gene_id "G6662"; gene_name "mpaA";	CAGAGACGATCATGACCGTAACCCGCCCACGCGCCGAACGCGGCGCATTTCCGCCCGGAAC
1411270	+	1995.79	antisense,	A:gene_id "G6675"; gene_name "ttcA";	GAACATCGTCTCGATACGCCCTGGATAACGTTTATCCCAGTCACGCAACATGTCAGCAATC
1411568	+	1039.71	antisense,	A:gene_id "G6675"; gene_name "ttcA";	TTCGTCGCCCCCAGTTCCGTTGCGGTACGATAAAGGATACCGCGACGAAGGCGAGAACACA
1417486	+	296292	antisense,	A:gene_id "EG10813"; gene_name "racC";	TCTTGCCGGATACACACTGTTCATAGCCTGCGCCATACGCAGGCTATTTCTTTCAGATTTC
1418562	-	43897.2	orphan		GTATAGCCGAGACCACCGAAGCCCGGAGGTGGTGAAATAAAACCGGGCACAACACGAAGGC
1420148	-	146568	internal,	I:gene_id "G6680"; gene_name "racR";	TTAACAAAAAAATCGCATCGGGATCCGTCAAATCAAAGGCGGAGGTCGCACGCCACTTTAA
1434540	-	51526.2	orphan		GTCTCTGCATAAGATAGTTTGCAGTTGCCACTTCAGCTTGCGCCATAAACCGCCTGATTTT
1435153	-	34193.2	primary,	P:gene_id "G6699"; gene_name "uspF";	CGTGCTGGTTGTGCGCTGACACTAACGCCCGCACATTGCTGCGGGCTTTTTGATTCATTTC
1463441	-	27693.3	antisense,	A:gene_id "G6719"; gene_name "paaK";	GTCGTATCGACTTCTGGCCCTGGCGCTTTACCCCACCAGGGCCAGACGATACGTCAGGCAC
1479776	-	24962.1	antisense,	A:gene_id "G6729"; gene_name "ynbC";	TCATCGCCTGATATCAGAAGTTGCGTGGGGAGCGTAATCGCCGCCGCATCTCTAATAATAC
1489677	-	57365.1	antisense,	A:gene_id "EG10035"; gene_name "aldA";	TTCGCTAAACTCTGACGCGCACAGGCGGAGGAAAAAACCTCCGCCTCTTTCACTCATTAAG
1489709	+	1519.94	primary,	P:gene_id "EG10035"; gene_name "aldA";	TTTACAGTCTTAATGAGTGAAAGAGGCGGAGGTTTTTTCCTCCGCCTGTGCGCGTCAGAGT
1490439	-	30236.4	orphan		CGCCGAAAAAGAGGCTAAAAATATTCCGTGGAAAGCGAAAGGTGCAGAAATCATTGTCGAA
1490584	-	24397.5	orphan		TAGACGTTGTCGCTATTAATGATCTCACTTCCCCATAAATTCTCGCCTACCTGCTGAAACA
1491442	-	697810	primary, antisense,	P:gene_id "G0-10592"; gene_name "rydC";,A:gene_id "EG10172"; gene_name "cybB";	CCGTATTCTTCGCCTGTACCACGGGTCGGTTTTAGTACAGGCGTTTTCTTTAAATATCCTT
1492144	+	1920.91	internal, antisense,	I:gene_id "G0-9611"; gene_name "sokB";,A:gene_id "G6736"; gene_name "mokB";	CGGGTAAGAGGCTAAGATCTGAATTGCTAGGTTCATTCGTTGGCCTCGGTTGATAGAAATA
1492156	-	34381.4	antisense,	A:gene_id "G0-9611"; gene_name "sokB";	ACTTTCTGTTTTCAGGCTAACCGGGAATCAGAAAGACGAAGGCCCCGACCGATATTTCTAT
1495034	-	41445.9	internal,	I:gene_id "G6737"; gene_name "ydcI";	TTTAACATCGCTTATGGAAAAAAATAGTCTGTTTAGTCAGCGCATCCGTTTGCGCCACCTT
1504925	+	2409.91	antisense,	A:gene_id "G6744"; gene_name "ydcO";	GGATCCACGTCCTTCAGGGCGTGGAGGATGTCAATATCGGTTTCTGTCAGCGATTAAATTC
1517039	-	433399	antisense,	A:gene_id "G6755"; gene_name "patD";	TTTGCACGCAGCACGTACTGTCAGAGAAATCAGTGCTCTGACAGTACGCAAGATCATCTCA
1517918	+	5996.12	primary, antisense,	P:gene_id "G6757"; gene_name "ydcY";,A:gene_id "G6758"; gene_name "ydcZ";	GCACCATCCTCTGATTAAAATGAGCGTCTGGCTACCAACCAGGCGCCAACCACAAGTAAAA
1523279	+	2621.36	orphan		AACAAGAGCGTAACGATGATTACGCTTAGCGAAGCATTGTGAAGCAGCAAAAATATCGGTT
1524476	+	3172.08	antisense,	A:gene_id "G6764"; gene_name "ansP";	GGCACTTTCGTCAGTAATCTGAATTTGCCCGGCACGTAGCCGGGCAATTTTGCAATTAACT
1552652	-	29107.2	internal,	I:gene_id "G6774"; gene_name "yddM";	TACTGAGAGTAAAGACACTAATGAAAATGGCCAATCATCCCCGCCCGGGGGACATTATTCA
1555766	-	143837	orphan		ATCAGTCCTCAATGACGATTAAACACCATTGCCTGCGCAATGGTGTTTTTGTTTTTATCTG
1555937	-	29295.3	internal,	I:gene_id "EG11508"; gene_name "sra";	TAGCTACAGGATTGAGGAGTTAAAATGAAATCGAACCGTCAGGCACGTCATATTCTTGGAC
1557103	+	2106.05	primary, antisense,	P:gene_id "EG10680"; gene_name "osmC";,A:gene_id "G6777"; gene_name "ddpF";	GTAAAGCATTGCCGGATGACGCGTCAGGCGCGTGAATGCCTGATGCGTTGTTAGCATCTCT
1568900	-	70553.1	orphan		TGTCTGAATGGTTATAAGACAAGGGAGCGATAATTCATCGCTCCCTTTTTCGTGCTTGCTG
1570594	-	33816.8	orphan		TAACGTTTAACGGTAACGGTGTCCCGAAACGAACCCGTTTCGGGACAATTTCCAAAGTCTG
1611820	-	27317	internal,	I:gene_id "G6808"; gene_name "dgcF";	TCTGGATTTCTGGCCTTTGCTTGCGGACTGGTTCAGTGAGCAATTCTCAACGGGCGTGTTG
1622804	+	10287.5	antisense,	A:gene_id "G0-10671"; gene_name "mgrR";	ATCCCTCACCTAACCGGCCCCTTGTTACAGTTGTGTACAAGGGGCCTGATTTTTATGACGG
1622819	-	5310560	internal,	I:gene_id "G0-10671"; gene_name "mgrR";	ACACAAATCTATCCATGCAAGCATTCACCGCCGGTTTACTGGCGGTTTTTTTTCGCCGTCA
1628294	+	1246.77	primary,	P:gene_id "EG12345"; gene_name "ydfG";	TGAATGTCCACCGTCAGTAATTTTTATACCCGGCGTAACTGCCGGGTTATTGCTTGTCACA
1628455	+	828.26	internal,	I:gene_id "G6814"; gene_name "ydfH";	TCGTATTCTTCGTCGCGACATTGTCCATTGCCTGATTGCTCCAGGCACACCGTTGTCGGAA
1632571	+	7362.27	orphan		TTACCAGCCAATCGCAGCACGTTCTTGCATAAGGTGTGTCTGCGGTTTTTCAACTATTCAG
1632791	+	2502.65	orphan		GCTTGCGCCATAAACCGCCTGATTTTTGCTGCCACCTGTTAGCATTCCTGTATACCTGAAA
1637558	-	310754	orphan		TGTATTCAATAATAAAATTTATCCATAAACCTCGTTTTTACGGGGTTTTGTTATATTTGAA
1638226	-	35795.2	orphan		TCGTTGGATTTAAAAAAGTGAAAATGAAGGCTCCTTCGGGAGCTTTTTTGCTTGGTGTCTA
1638774	-	36171.7	orphan		GTTAATGGTGTTCTGGTTTGTTACAAATTTATCTGAAGCAGTCATTGTTATAATTTTATTA
1638982	+	2198.47	antisense,	A:gene_id "G6826"; gene_name "ydfP";	ATCTTACCCTTAAGATTTCAGGAATTTTGGCTCATGGAAGAGTCCTTTTTATTTAAATTTT
1641060	+	1026.56	orphan		TAATAATATATTTAAAGCAGATAATAAAAAACCCGCCTGAGCGGGTTTGAGATTGTGGTGC
1641224	-	2464295	orphan		GTAGTGAATATTGGATCTCTTTAATAAAAAGTAAGGAGGTCCAATACATGAAACAATGGCT
1642356	-	123305	orphan		TACCCGACGTTAAGAAAAAGTAGAAAACCCGCTGATGAGCGGGTTTTGTGCTTTAAATGGG
1644573	-	75262.8	orphan		AACTCCCGCTGAGTAACACCGTGCCACCGGAGAAAACCGATGGCACGCAACGCAAAATATT
1645086	-	58590.7	primary,	P:gene_id "EG11130"; gene_name "hokD";	TACGAACCTGAGGAGTAAGAGACCCGGCGGGGGAGAAATCCCTCGCCACCTCTGATGTGGC
1646748	-	36359.8	antisense,	A:gene_id "G6833"; gene_name "flxA";	TCTTTAAAGAAAAGGCTGATGGCGAAAAGTGGCCCGATGAGGGCCACAATACGGCTGTCAC
1647051	-	736992	orphan		TTTCGGGTGGTTTGTTACTTGTTTTACCGGGGATATGCCAGAAACGCGCTGAGTCAGTCTG
1648368	+	3119.13	primary,	P:gene_id "EG10226"; gene_name "dicA";	CGTCAGCGGACAAATAAAAGATAACATCATCAATGAGTTATCTTTTACCACATCAATTATG
1649368	+	5569.16	orphan		CCGGGTTGTCAGGTTGACCATACGCTTAAGTGACAACCCCGCTGCAACGCCCTCTGTTATC
1649584	+	753.393	orphan		TTAATTGTTAACTGGTTAACGTCACCTGGAGGCACCAGGCACTGCATCACAAAATTCATTG
1672076	+	3039.88	internal,	I:gene_id "G6856"; gene_name "ydgD";	AAACCAGACGTTGCCAGATCGGCAAACGATGAGGTCAGCACCCTGTTTTTTGGTCATGATG
1673496	-	60096.3	internal,	I:gene_id "G6858"; gene_name "mdtJ";	TGAATTAAGCGAAAATTAAAATAATTCTCTTGCAGGAGAAGGACAATGTATATTTATTGGA
1673716	-	104182	orphan		CGAGGACAATTATCATCCGCGATGACGAGAAGCAACACTGCGGATAATTGTAATATTATGG
1674942	-	111246	primary, antisense,	P:gene_id "EG10745"; gene_name "pntB";,A:gene_id "G6859"; gene_name "tqsA";	GCAATCCTGAAAGCTCTGTAACCCTGACGGCCTCTGCTGAGGCCGTCACTCTTTATTGAGA
1679414	+	1035.33	primary,	P:gene_id "G6860"; gene_name "ydgH";	ATAAATAACTATTCAGTTACTCCTATAAGGCGGCTTGATGCCGCCTTTCGCATTTTTAGTC
1697041	-	24774	internal,	I:gene_id "G6867"; gene_name "uidR";	CGCGGTAAACTAGTTATTCACGCTAACTATAATGGTTTAATGATGGATAACATGCAGACTG
1697226	-	43612.6	primary,	P:gene_id "EG10425"; gene_name "hdhA";	TTAATACACTAACGGACCGGTAAACAACCGTGCGTGTTGTTTACCGGGATAAACTCATCAA
1704938	+	1022.17	orphan		GAAATTTTATCATCACTAATAATACCTACCCCTTTGGTATTAATTATTTTATGGACCTTTT
1717931	-	86284.1	internal,	I:gene_id "EG11487"; gene_name "pdxH";	AATCGCGCATCTGCGCCGTGAATACACCAAAGGCGGGTTACGCCGCCGCGATCTTCCCGCC
1720344	-	40881.3	primary, antisense,	P:gene_id "G6882"; gene_name "slyA";,A:gene_id "G6881"; gene_name "slyB";	GGTGAAATGAAGGGGGCGTGTGGTCAGTAACCTGACCACACGCAAACTTATTTAGCGCGGA
1720383	+	2194.08	primary, antisense,	P:gene_id "G6881"; gene_name "slyB";,A:gene_id "G6882"; gene_name "slyA";	CTCCGCGCTAAATAAGTTTGCGTGTGGTCAGGTTACTGACCACACGCCCCCTTCATTTCAC
1728279	+	828.26	primary,	P:gene_id "G6891"; gene_name "gloA";	CGGTCTGGGCAACTAATCTCCTGCCGGGCGTGAACTCATCGCGCCCGCATCTTTACTGCAT
1733707	-	291535	primary, antisense,	P:gene_id "EG12181"; gene_name "grxD";,A:gene_id "EG11548"; gene_name "lhr";	ATAATCCGTCCTGCAATACTGACGGATGCGAACGGGCATCCGTCAGTCCTTTCTCTATCCC
1735248	-	26752.3	antisense,	A:gene_id "G6892"; gene_name "mepH";	GAGACAAAAGATGAACTTACCCTGTTGCCGTAACAACAGGGTAAAGTTTTAGCGAAGTGTT
1736115	+	2317.51	antisense,	A:gene_id "G6893"; gene_name "ydhP";	TCGCACGTTGTCAGCAACTGTAACGCAGAAGGTTATCCTTCTGCGTTTTTGTTTAATTAGC
1737422	-	650709	primary,	P:gene_id "G0-10594"; gene_name "ynhF";	CTGCCGCGCTGCACTGATTTCCTCTCGAGGGAGCGCGTTCTCCCTCGCATCTCCTTCCTGT
1737832	+	2225.11	orphan		AAAGGCAAACGTTTACCTTGCGATTTTGCAGGAGCTGAAGTTAGGGTCTGGAGTGAAATGG
1737952	+	889.975	internal,	I:gene_id "EG10800"; gene_name "purR";	ACGTGATCAACAAAACACGTTTCGTCGCTGAAGAAACGCGCAACGCCGTGTGGGCAGCGAT
1738908	+	889.975	primary, antisense,	P:gene_id "EG10800"; gene_name "purR";,A:gene_id "EG12140"; gene_name "ydhB";	TATCGTCGTTAATCACCCGTTGCGGGAGTCTCTTCCGGCTCCCGCAGCCACTCCTTATTCA
1741259	+	19112.7	orphan		AAAGCTACGATAAATATTATGTTTTTACGGGGACAGGATCGTTCCCGACTCACTATGGATA
1742568	-	72719.7	primary, antisense,	P:gene_id "EG11406"; gene_name "ribC";,A:gene_id "EG11531"; gene_name "cfa";	CCAGGCACAGAAGCCTGATCTGAAATCGCCCCCGGAGAGGGGGCGATAGAATAGCCTTTAG
1743422	+	696.062	orphan		ACTGAATTTCCCCTGCTTCTTCTTTTTGCTGCCCATTCAGGCGGCTTTTTAGTCTCTCATA
1744869	+	1577.27	primary, antisense,	P:gene_id "EG12400"; gene_name "mdtK";,A:gene_id "G6894"; gene_name "ydhQ";	GCATCCCGCTAATAAAGACAAGGCGCAACCTTCACGGGTTGCGCCTGTATTTTTACGCAGG
1746511	+	24220850	primary,	P:gene_id "EG30111"; gene_name "valV";	ACCACCTTGACATGGTGGGGGTCGTTGGTTCGAGTCCAATTGAACGCACCATCCTGCGTCC
1747039	+	6361.69	primary,	P:gene_id "G6895"; gene_name "ydhR";	AGGCAAAACTCGCCTGACAGAATTTAATCAAGGGCGGTTAGCGCCCTTTTCATCCCTGTCT
1754895	-	87321.4	primary,	P:gene_id "G6903"; gene_name "ydhZ";	CACTGGTAAAATGACCATTCAGGATGAGGCGGTAAGCTTCATCCTGATATTCTTGCTTCAG
1757702	+	275198	primary, antisense,	P:gene_id "EG10544"; gene_name "lpp";,A:gene_id "G6904"; gene_name "ldtE";	AAGTAATAGTACCTGTGAAGTGAAAAATGGCGCACATTGTGCGCCATTTTTTTTGTCTGCC
1764708	-	2785910	primary,	P:gene_id "G0-8876"; gene_name "rydB";	GAGCTAAGCCACTGAGAGTGCCGGAGATAAGCGCCGGATGGGGTAGAAACCCTTAAGCCTG
1770469	+	1766.8	internal,	I:gene_id "G0-8863"; gene_name "rprA";	GTGAAACAACGAATTGCTGTGTGTAGTCTTTGCCCATCTCCCACGATGGGCTTTTTTTTAA
1787648	-	24585.7	antisense,	A:gene_id "EG11132"; gene_name "ppsR";	CTTTGCAAGATGATGGCGCGAATCTCCGGCAACACGATGGAGTAGAAGACCAGCGGGCGCA
1791935	-	55198.4	internal,	I:gene_id "G6925"; gene_name "ydiV";	TTGCTATTTCCTGCCGATAAGAGACAACCAGCAAGTCCTTGTCGGCGTTGAGTTAATTACC
1798987	-	30897.5	orphan		CACAGCCCGGGACCAAAATGGCAAGTAAAATAGCCTGATGGGATAGGCTCTAAGTCCAACG
1799251	-	130370	internal,	I:gene_id "EG11272"; gene_name "pheM";	TTTTGAAGAGTACCAAAAGGTAACGCAAGCAATGAATGCTGCTATTTTCCGCTTCTTTTTT
1799356	-	1079487	primary,	P:gene_id "EG10881"; gene_name "rplT";	CAGCTCTGGCATAAGCCAGTTGAAAGAGGGAGCTAGTCTCCCTCTTTTCGTTTCAACGCCA
1800045	-	220610	orphan		GGCCTTCAAGTAGCACTGTCTGTGGAGCCTTCGGGCTTCACAGGCTTTGTTCGCCTTTGTT
1800324	-	51429.8	internal,	I:gene_id "EG10506"; gene_name "infC";	AAAGTTATCCAGGTTAAGGAAATTAAATTCCGTCCTGGTACAGATGAAGGCGACTATCAGG
1801661	-	23171.9	internal,	I:gene_id "EG11001"; gene_name "thrS";	AGTACCAGTATCAGGAAGTTAAAGGTCCGTTCATGATGGACCGTGTCCTGTGGGAAAAAAC
1802640	-	85719.5	orphan		CTGATTGCGAACCAATTTAGCATTTGTTGGCTAGATGGTTTCGCAATGAACTGTTAATAAA
1806107	-	31085.6	orphan		CGCTAATCTTTGATCCTTAAGAAAGTTTCCGGGACCGCGATGGTCTCTTTTTTTGTTGTAC
1812373	+	1167.53	primary, antisense,	P:gene_id "G6934"; gene_name "tcyP";,A:gene_id "G6935"; gene_name "ydjO";	TAATTCTTATGCTGGCAACGGTCCGTTTTGTATAGGGGCCGTTGCCTTACTTTTTAAATGT
1821862	-	28919	orphan		TCGTCTGAAAGCTTGAGTAACAACGGAAACCGGCCATTGCGCCGGTTTTTTTTGGCCTGAG
1825060	-	113036	orphan		GTCTTGTCCACTACCTTGCAGTAATGCGGTGGACAGGATCGGCGGTTTTCTTTTCTCTTCT
1861654	-	32026.6	primary,	P:gene_id "G6964"; gene_name "yeaC";	TAAGTGGTTCATCCCCTTTTTGCCTCGGCTATGAAGGGGATAGCCAACAATGACCCCACGA
1862709	+	947.307	orphan		GGCACAGGATTGATTTGTCGCAATGATTGACACGATTCCGCTTGACGCTGCGTAAGGTTTT
1863817	+	1423.15	orphan		GTTGAGATGACACTGTGATCTAAAAAGAGCGACTTCGGTCGCTCTTTTTTTTACCTGATAA
1864740	-	126600	primary, antisense,	P:gene_id "G6967"; gene_name "yeaE";,A:gene_id "G6966"; gene_name "yeaD";	ATGGTGTGATGTTGTGTGCCGGATGCATTGCACCCGGCACACAACATTAACGTAAATTAAC
1868880	+	762.161	primary,	P:gene_id "G6969"; gene_name "yeaG";	TAAATCGTCTTAACAACCCTGGCCCGGTACACATGTTACCGGGCCTACAACGACAGCGAAC
1878965	-	578742	primary, antisense,	P:gene_id "G6981"; gene_name "yeaQ";,A:gene_id "G0-10648"; gene_name "yoaJ";	AAAAGTTAACGCTTAAATTGCACAAAGGCTGCACACAGGCAGCCTTTGCTATTTTTTAGAG
1878996	+	881.207	primary, antisense,	P:gene_id "G0-10648"; gene_name "yoaJ";,A:gene_id "G6981"; gene_name "yeaQ";	TAACGTCACCTCTAAAAAATAGCAAAGGCTGCCTGTGTGCAGCCTTTGTGCAATTTAAGCG
1887883	-	36548.1	internal,	I:gene_id "EG10858"; gene_name "rnd";	GTGCCTTTCCGGCGATAGCCCTGGATACTGAATTTGTTCGTACGCGCACTTATTACCCGCA
1888018	-	37961.9	primary, internal,	P:gene_id "EG11530"; gene_name "fadD";,I:gene_id "G0-9384"; gene_name "sroD";	AAGCCTGAGCGTTAAGTCAGTCGTCAGACGCCGGTTAATCCGGCGTTTTTTTTGACGCCCA
1893787	+	1224.85	orphan		ACGATAATTTATCGATAATACTGGTCGGTTTTACATAAATCGACCAGAGAATAAGATATTA
1894457	-	52655.4	antisense,	A:gene_id "G6994"; gene_name "yoaC";	TGATTGTGAGAAAAAGGACGCTTTTTATATGTGATTAAAAGCGTCCTGACCCATTTATGCT
1894497	+	7696.82	orphan		AGCATAAATGGGTCAGGACGCTTTTAATCACATATAAAAAGCGTCCTTTTTCTCACAATCA
1896275	+	3277.97	internal,	I:gene_id "EG12693"; gene_name "nudL";	GCCCGCAAATTAACCGGGAAACCCTAAATCATCGTCAGGCTGCTGTGTTAATCCCCATCGT
1904784	+	2396.76	primary,	P:gene_id "EG10569"; gene_name "manZ";	GCTGGGACTGTAAGACTGTTGTACACTACCGGGGCCTTTTGGCCCCGTTTTTTTATCTGGA
1906214	-	40316.8	primary, antisense,	P:gene_id "EG12207"; gene_name "rlmA";,A:gene_id "G6999"; gene_name "mntP";	AGCGTTCTTATTAACCGTGGAAGTGCGTCCAGAGGATCTGGACGCCGATGCCGATCAGCAC
1907153	-	4967005	orphan		TGAATACGCTTCAATCTCGCTATAAAGCCTCGTCGAATGCGAGGCTTTTTACTATGCTTTA
1907479	-	129520	internal,	I:gene_id "G7000"; gene_name "yobF";	TGCCGAGCCTTATATTGGTGCCTCATGCAGTAATGTGTCAGTTTTATCTATGTTATGCCTG
1908213	-	292857	primary,	P:gene_id "G7001"; gene_name "yebO";	TAATCCTTCCTCAATCTTGAGTAACCCCGTCGTTGAAGGGTTACTCAATTCATCCTGATTA
1908502	-	34005	internal,	I:gene_id "G7001"; gene_name "yebO";	TGAAATGAACGAAGTTGTAAATTCAGGCGTGATGAACATTGCGTCTTTGGTTGTATCGGTG
1908667	-	36359.8	internal,	I:gene_id "G7002"; gene_name "mgrB";	TGCTGCTTTGGGCGCAGGTATTCAACATGATGTGCGATCAGGATGTACAATTTTTCAGCGG
1909303	+	744.624	antisense,	A:gene_id "G7003"; gene_name "kdgR";	CTCATGCTAAATAAAGAACCTGTCTGTTTGATATTCCGACAGGTTCTTACTCTCATCAGAA
1912733	-	29483.6	primary,	P:gene_id "EG10760"; gene_name "prc";	CGCTCCCGTCAAGTAATATCAATCAGGCACAAGAAATTGTGCCTGATTTTTTAACAGCGAC
1914655	-	54822.1	internal,	I:gene_id "EG10760"; gene_name "prc";	GAGACGCAGCATGCGACGGTAAGTGAGCGCGTAACGTCGCGCTTCACCCGTTCTCATTATC
1915559	-	26752.3	orphan		ACTGATAGCGTCATTATAATGACGCCTGTTCATGCCTGCGCTTGTTGGCTACGTCCGTTGT
1922050	+	14909	primary,	P:gene_id "G7009"; gene_name "yebV";	TTATGCGTCTTGCCTGATCCAAAAAGAACCCGTCGGCATGGCGGGTTATTTGTCCTGGTTA
1923104	-	7082340	primary, antisense,	P:gene_id "G0-8883"; gene_name "sdsR";,A:gene_id "G0-8865"; gene_name "ryeA";	CAAGAGCCATTTCCCTGGACCGAATACAGGAATCGTGTTCGGTCTCTTTTTATCTGTTAAA
1923121	+	19993.2	internal, antisense,	I:gene_id "G0-8865"; gene_name "ryeA";,A:gene_id "G0-8883"; gene_name "sdsR";	CAGCGAAGGAAATGCTTCTGGCTTTTAACAGATAAAAAGAGACCGAACACGATTCCTGTAT
1923337	+	762.161	primary, antisense,	P:gene_id "G0-8865"; gene_name "ryeA";,A:gene_id "G7012"; gene_name "yebY";	AAATGTTAAAAACCGCCCGTTCTGGTGAAAGAACTGAGGCGGTTTTTTTATTGGAAATCAA
1925232	-	42483.3	antisense,	A:gene_id "EG11505"; gene_name "holE";	GGGCAATAAGCCGCTCGCGAAACCAGCTGCGCAAATGTTCAGGCTGTTCACGTTCAACCGC
1929972	-	29483.6	orphan		AATTCGATTGACTGTTGGCGGATGCGGCGCGAGTGCCTTGTCCGCCCCAGAACGCACCACA
1942003	-	27128.8	internal,	I:gene_id "G7017"; gene_name "znuA";	GAAGGATTTTGAGGCACAATTAGCCTCAACCGAAACGCAGGTTGGTAACGAGCTCGCGCCG
1954572	+	1044.1	antisense,	A:gene_id "G7022"; gene_name "torZ";	CAGGCAGCTTTACGTTTGCATAACCTCAGCGCCCGTTTCCGGGCGCTATTCACGTCTTACG
1958650	-	67445.4	internal,	I:gene_id "G7024"; gene_name "cutC";	TGCCGGAGTGCTGGAAGTCCATAGCTCCGCGGGAGCGTGGCAAGCCTCACCGATGCGTTAT
1984165	+	828.26	antisense,	A:gene_id "EG10058"; gene_name "araG";	GCTGTTGGTCGATATAAACCTGACCGGCGGTGATTTGCGTCCCGCCAAACATGCCTTTCAT
1985131	+	1414.38	antisense,	A:gene_id "EG10057"; gene_name "araF";	GAATCACTGGTCGTTCACACCCCCTCTGCATCATGCAGAGGGGAATTTTTCCGGCAAATTA
1986899	+	885.59	orphan		ATTATTCTGCAAACAGTAATTATGGTGTTTTGATTTATCTTGCACCTCTCCACTTCTGGAT
1987707	-	27505.1	internal,	I:gene_id "G0-10455"; gene_name "yecJ";	TGTCCCAGCCGCTGAATGCCGATCAGGAATTGGTTTCTGATGTGGTTGCTTGCCAGTTGGT
1987844	-	67633.6	primary, internal,	P:gene_id "G0-10653"; gene_name "azuC";,I:gene_id "G0-8904"; gene_name "isrB";	GCCAGGCAATATGTTCCGATAACAAAAAACCTGCTCCGGCAGGTTTTTTTGTGTCCTGATG
1991914	-	1078715000	primary,	P:gene_id "G7991"; gene_name "cysT";	TAGCGGATTGCAAATCCGTCTAGTCCGGTTCGACTCCGGAACGCGCCTCCACTTTCTTCCC
1996471	-	27128.8	internal,	I:gene_id "EG10935"; gene_name "sdiA";	GCCGTTATGGGAAGCCGCGCGCGCACATGGTTTACGCCGCGGTGTCACTCAGTATTTAATG
2001913	-	47757.6	orphan		TAAAGCGCAATTTGTCAGCAACGTGCTTCCCCGCCACCGGCGGGGTTTTTTTCTGCCTGGA
2024594	-	63865	primary, antisense,	P:gene_id "G7045"; gene_name "dsrB";,A:gene_id "EG10820"; gene_name "rcsA";	AGCAGAGTAATCTTATTCAGCCTGACTGGTGGGAAACCACCAGTCAGAATGTGTTAGCGCA
2025229	-	777985	internal, antisense,	I:gene_id "G7047"; gene_name "dsrA";,A:gene_id "G7046"; gene_name "yodD";	AAGTGCTTCTTGCTTAAGCAAGTTTCATCCCGACCCCCTCAGGGTCGGGATTTTTTTATTG
2025257	+	2462.86	primary, antisense,	P:gene_id "G7046"; gene_name "yodD";,A:gene_id "G7047"; gene_name "dsrA";	TCGTTGAATGCACAATAAAAAAATCCCGACCCTGAGGGGGTCGGGATGAAACTTGCTTAAG
2043181	+	1863.59	orphan		AATTATGGACTTTGTCCCGCGGCTTTAATCTGACGGCCGCGTTCCTTTTTTGACTCAATTA
2043468	-	65008400	primary,	P:gene_id "EG30094"; gene_name "serU";	ACCGGAGTAGGGGCAACTCTACCGGGGGTTCAAATCCCCCTCTCTCCGCCACTTTATCAAT
2044735	+	1352.67	orphan		AACGGATAGCGGGTTTTTAACATCTTAAGCGCCCTCGACCTTTATGGTTGAGGGCGTTTTG
2053689	+	1304.11	internal,	I:gene_id "G7067"; gene_name "shiA";	CATTATGGACTCCACGCTCATCTCCACTCGTCCCGATGAAGGGACGCTTTCGTTAAGTCGC
2054994	+	757.778	primary,	P:gene_id "G7067"; gene_name "shiA";	CAGTCAACGCGCTTGATAGCCTGGCGAAGATCATCCGATCTTCGCCTTACACTTTTGTTTC
2056608	+	753.393	orphan		AGTAAGACACCTGGCAAATAGCCTGCAATAATCGTGGGCTGTTTGCTTCCTTGGGCGGATA
2058025	-	586940	primary,	P:gene_id "G7069"; gene_name "asnW";	CGGACTGTTAATCCGTATGTCACTGGTTCGAGTCCAGTCAGAGGAGCCAAATTTTAGTTTT
2059967	+	5348.62	primary, antisense,	P:gene_id "EG30021"; gene_name "asnU";,A:gene_id "G7071"; gene_name "cbl";	AGAGGAGCCAAATTCCTGAAAAGCCCGCTTTTATAGCGGGATTTTTGCTATATCTGATAAT
2062372	+	700.448	primary, antisense,	P:gene_id "EG30022"; gene_name "asnV";,A:gene_id "G7073"; gene_name "ldtA";	AGTCAGAGGAGCCAAATTCAAAAAAGCCTGCTTTCTAGCAGGCTTTTTGCTTTCTAATTAC
2068394	-	389603	orphan		CGGTCTCTGGTTGTATCCACGGACCGCACTCTTGACATAAGAGTGCGGTCCGTGGAAAACG
2074672	-	26940.5	antisense,	A:gene_id "G7080"; gene_name "flu";	GATCCGTTGCGCCGGTCCGGGTCCCGGTCATGATGACCGGGACCACAGAGAGGCGATGGTT
2078987	-	32403	primary,	P:gene_id "G7087"; gene_name "yeeX";	AAGTAATTCCCGTTTTATTCAATGAGGGTTGCCCGGCAACCCTCATTGCTCATTGATTCTT
2084187	-	93536.6	primary, antisense,	P:gene_id "EG11894"; gene_name "yeeD";,A:gene_id "EG10926"; gene_name "sbcB";	CAAAAAGCCTGACTCAACATTGTCCTCCGCCGTACCAGCGGCGGAGGCTTCAAATTAGACA
2090132	+	19230.5	orphan		CTTCCAGTGGTGCATGAACGCATGAGAAAGCCCCCGGAAGATCACCTTCCGGGGGCTTTTT
2097270	-	47945.8	antisense,	A:gene_id "EG10451"; gene_name "hisI";	TCTTTTCGGTTTTAAAGAAAAAGGGCAGGGTGGTGACACCTTGCCCGTTTTTTTGCCGGAT
2097849	-	25526.7	internal,	I:gene_id "G7090"; gene_name "wzzB";	TCTTATGTTGGGCAAACTGCAGAGGGCGCACAAATGAAGTTGGCCCAATACATTCAGCAAG
2098289	-	34569.6	internal,	I:gene_id "G7090"; gene_name "wzzB";	CTATGCGGACTTGGAAATTTCCGTCAGTTAGGGTAATGATGAGAGTAGAAAATAATAATGT
2101288	-	26940.5	orphan		GTATACTTATTTGCGAACATTCCAGGCCGCGAGCATTCAGCGCGGTGATCACACCTGACAG
2113346	-	73660.6	orphan		TATAACGGCAGTGAAAATTCGCAGCAAAAGTAATTTGTTGCGAATCTTCCTGCCGTTGTTT
2139566	-	31838.4	orphan		CAAGCCGGTGAACGTGCCAGGGTGGCTCAATCTCCACCACCCTGGCAACCCGGGCTCCCGG
2139607	+	4207.4	orphan		CGGGAGCCCGGGTTGCCAGGGTGGTGGAGATTGAGCCACCCTGGCACGTTCACCGGCTTGA
2153420	+	76162.5	internal, antisense,	I:gene_id "G0-8884"; gene_name "sibA";,A:gene_id "G0-10633"; gene_name "ibsA";	CACTAAGAGTATCACCAGTATGATGACGTGCTTCATCATAACCCTTTCCTTATTAAAAGCC
2153749	+	358242	internal, antisense,	I:gene_id "G0-8885"; gene_name "sibB";,A:gene_id "G0-10632"; gene_name "ibsB";	TATGACTAAGAGCACCACGATGATGAGTAGCTTCATCATGACCCTTTCCTTATTTATGGCC
2167199	+	25205.3	internal,	I:gene_id "G0-8878"; gene_name "cyaR";	CAGGAACCACCTCCTTAGCCTGTGTAATCTCCCTTACACGGGCTTATTTTTTACGCGTAAT
2171800	-	78655	primary,	P:gene_id "EG12417"; gene_name "gatD";	GTGTTGCTCATTCCCTGAAACCGCGGGCCAGCGTGATGCTGGCCCGGTATTGTGCAAAACA
2172888	-	68574.6	primary,	P:gene_id "EG12416"; gene_name "gatC";	GTCGTTCTCGCAGAATAATTTTTACCTGAGGGGGAGGTTATCCCCCTTAACAATCAGGAGT
2176260	-	87789.6	internal,	I:gene_id "G7128"; gene_name "gatZ";	AATTGCCCGGCATAAAGCTGGTGAACATATCGGCATATGTTCAGTCTGTTCTGCCCATCCG
2177079	-	72343.3	internal,	I:gene_id "EG12419"; gene_name "gatY";	CACAATCTCGAAACGATGCAAGTGGTGGTAGAAACCGCTGCCAACCTGCATGCGCCGGTCA
2177323	-	25150.3	orphan		CATAAAAACACGCGCACTTTGCTACGGCTTCCCTATCGGGAGGCCGTTTTTTTGCCTTTCA
2180176	-	32403	antisense,	A:gene_id "G7131"; gene_name "yegU";	TCCAGGAAGAAAACGGTCAATCCAGCCAAAGTGTGCTTTAACGCGGCTGCGTGGCCAAAGC
2185342	-	515354	orphan		ATACCCGTATCACCTGATCTGGATAATGCCAGCGTAGGGAAGTCACGGACCACCAGGTCAT
2192460	-	34193.2	orphan		GCAACCTGATTTTAATTGCATTTAGAAAGCCGAAATCATTTATATAAATGATTTCGGCTTT
2204445	+	2277.72	orphan		TTCGTTCGTTGGAACACGATGTTGCACAGGCTGTGGTGTTAGGCCTGAAAATAGTAAATAA
2215813	+	1290.95	primary, antisense,	P:gene_id "G0-10459"; gene_name "yohO";,A:gene_id "EG12009"; gene_name "yehW";	AAGCGCCTGCACCAGCCTTTCAAACAGGCGGTCTGCGATGATCGCCGCCAGTGCCACCAGT
2223987	+	1105.81	antisense,	A:gene_id "EG12015"; gene_name "pbpG";	CTTAATCGTTCTGTGCCGTCTGCCCCGCCGCCGCCATTTGGGCGGCTTTTTGTTTTTTATA
2230706	+	757.778	internal,	I:gene_id "EG12023"; gene_name "yohJ";	TTTACGCGCTTTCGTCCTGATTTATGCCTGCCTGTATGCAGGCATTTTCATTGCTTCCCTG
2242871	-	64617.8	internal,	I:gene_id "EG11290"; gene_name "yeiB";	TGGGGATCCTGCTATTAAACATCAGCGCCTTTGGGCTACCAAAGGCGGCTTATCTCAATCC
2243145	-	24774	internal,	I:gene_id "EG11375"; gene_name "folE";	AACGTCTGACGCAGCAAATTCTTATTGCGCTACAAACGCTGCTGGGCACCAATAACGTGGC
2243669	-	57176.8	orphan		GTAAATCAGCTTAATAACTTTGCCCCCACGCAGGGCGGAGGCGTCACACCTGCAGGAGAAA
2244710	-	75450.9	antisense,	A:gene_id "EG12026"; gene_name "yeiG";	AACCGGGCGGACTTTCACTTCAGTAAATACTGCGCATGGAAGCGCAGGTGATCCTCTATAA
2244773	+	753.393	primary, antisense,	P:gene_id "EG12026"; gene_name "yeiG";,A:gene_id "EG10155"; gene_name "cirA";	CATGCGCAGTATTTACTGAAGTGAAAGTCCGCCCGGTTCGCCGGGCATCTTCTCATCAGAA
2246805	-	49924.2	orphan		CGCGATGCTGCCGTACGCAAGGGGACGTGAAGAAGATGTGAGCGATAACCCATTTTATTTT
2259536	-	28730.8	orphan		TCAAACACTCAGGTTATTTCCTCAAGGGCAGATTATTTTCTGCCCTTTTTTATTGTTCTGT
2263539	-	213450	orphan		GTTTCAGCGCGATCTTGTCTTTAACCCTAAGCCAGGTTGGCGCTTTTTTTCTCATAGAGGC
2265251	-	83552.9	internal,	I:gene_id "G0-10511"; gene_name "yeiW";	CAACGTATGGAATGCCGTCCGGGTTGCGGGGCGTGTTGCACTGCCCCTTCAATTTCCAGCC
2269973	+	1493.63	orphan		TGGCATTTTTTTATAACGATATTTGTCGTTAAGGACTTCAAGGGAAAACAAACAACATGGT
2270081	+	3158.93	internal,	I:gene_id "G7147"; gene_name "mepS";	TTGCAGTAGCGGTTCTGCTTTCTGCATGTAGTGCAAATAACACCGCAAAGAATATGCATCC
2270620	+	2467.24	orphan		GGCTATCCTGACGAGTTAACTGAAAGCACTGCTTAGGCAGTGCTTTTTTGTTTTCATTCAT
2277685	-	68386.4	antisense,	A:gene_id "EG12041"; gene_name "yejF";	TAGGCCAGTTGATGCTTTTGTTGCAATGATTTCAATAGCGTCAATATTTGCGCCTGTACCG
2278566	+	881.207	antisense,	A:gene_id "EG11419"; gene_name "bcr";	TGGTTGACATGCATCAACAAAGGAAGCCTTTTAGCTTCCTCGTTGTGCAATAGATCACCGT
2280435	-	56988.7	internal,	I:gene_id "EG12044"; gene_name "rsuA";	ACATGCGACTTGATAAATTTATCGCACAGCAACTCGGCGTTAGCCGTGCTATTGCCGGGCG
2282582	+	2537.73	internal,	I:gene_id "EG10885"; gene_name "rplY";	GCAGAAGTACGTAAAGAGCAGGGTAAGGGTGCGAGCCGCCGCCTGCGTGCCGCTAACAAGT
2286287	+	2894675	primary,	P:gene_id "EG30067"; gene_name "proL";	ACCGTCATGGGGTGTCGGGGGTCGGAGGTTCAAATCCTCTCGTGCCGACCAAAAATCCCAA
2291359	+	3793.27	antisense,	A:gene_id "EG12052"; gene_name "ccmH";	CGCACTTTGTCAACAGTCTAGCCCGATGGCATCACCATCGGGCCTCTTTTTATTTACTCTC
2311605	-	246138	primary,	P:gene_id "EG10670"; gene_name "ompC";	CCAGTTCTAATCTCGATTGATATCGAACAAAGGGCCTGCGGGCCCTTTTTTCATTGTTTTC
2313176	+	3410.16	primary,	P:gene_id "EG30063"; gene_name "micF";	AATGTCTGTTTACCCCTATTTCAACCGGATGCCTCGCATTCGGTTTTTTTTACCCTTCTTT
2316036	+	1154.37	internal,	I:gene_id "EG12385"; gene_name "rcsD";	CTTTGCTGCGTTAGCCCAAACGGCTCATCGTCTTAAAGGCGTATTTGCCATGCTAAATCTG
2316833	-	29671.8	antisense,	A:gene_id "EG10821"; gene_name "rcsB";	CAATCGGTGCAAATGCCAGATAAGACACTAACGCGTCTTATCTGGCCTACAGGTGATTAGT
2333993	+	3656.69	orphan		GCCGTGACTGAGAAGAGAAAGTACGCTGCATCACGCGGCGAGATTTGCCGTACCAGTTATC
2336713	-	114542	orphan		TCTCCCTTGTTTGAATTGAAAAGTCCAGGCTGCAAAGTCTGGGCTTTTGTCGTATTAGGGC
2349896	-	31650.2	primary, antisense,	P:gene_id "EG10399"; gene_name "glpQ";,A:gene_id "EG12881"; gene_name "yfaH";	AATAAAGAGTAATGTTACTGCAGGATGGCGTTCATGCGCCATCCTGTCTCATATCAAATTT
2380674	-	128483	primary,	P:gene_id "G7173"; gene_name "elaB";	TAAAACCTCCCTACACCGGGGTACTGCATTTTTTTTGTAGTACCCCGTATAATGTGAGGCT
2391429	-	25150.3	internal,	I:gene_id "EG12093"; gene_name "nuoN";	CGCACTGCTACCGTTGCTGATCGTCGGCTTGACGGTGGTGGTTGTGATGCTCTCCATTGCG
2405082	-	124622	orphan		ATGTGGCGTCCATCTGCCGTGAAGAGCAGTGAATCTGGCGCTACTTTTGATGAGTAAGCAA
2405673	-	40881.3	primary,	P:gene_id "EG12123"; gene_name "lrhA";	ATTGAAAGGGATATCGAGTAATCGACGGACGATAGATAATTCCTGAGACAATAGTGTAAAA
2406933	-	25150.3	orphan		GCCTCACCATTGCTGTTGGTACGTGTTCGCGTATGACCAGCGATGCTGCACGAGAGTGGAA
2422635	+	1555.35	primary, antisense,	P:gene_id "G7196"; gene_name "yfcH";,A:gene_id "G7197"; gene_name "yfcI";	CGGATGTCGTTCGCTGATGTGGTTTACAGCAAACATCCGCCAGTTAACTCCCGGTGTTACA
2428685	-	27505.1	primary,	P:gene_id "EG10794"; gene_name "purF";	CATAACGAAGGATGATGCCTTCGCTGAGGGTGCCGGTCTGGCACCCTGACTTGCAACTCCC
2429969	-	53596.4	internal,	I:gene_id "EG10794"; gene_name "purF";	CGTTACCCCACGGCTGGCAGCTCCAGCGCCTCTGAAGCGCAGCCGTTTTACGTTAACTCCC
2430294	-	24774	internal,	I:gene_id "EG10169"; gene_name "cvpA";	ATTCAGTTTTATCATCAGATGTTTTTTTGATTATCTGCAAAGCTCGTCAAGTTTCTTGCCC
2430606	-	184154	internal,	I:gene_id "EG10169"; gene_name "cvpA";	TGCTTTCTTTGTTGCCAGTCATTACTACACTTACCTGTCAGTCTGGTTTACGGGCTTTGAA
2431708	-	41069.5	internal,	I:gene_id "EG10327"; gene_name "folC";	AGACACCGTGCTGGTGTGTGGTTCTTTCCACACGGTCGCACATGTCATGGAAGTGATTGAC
2432888	-	38902.9	internal,	I:gene_id "EG10327"; gene_name "folC";	TTATCAAACGCACTCCTCAAGCCGCGTCGCCTCTGGCTTCGTGGCTTTCTTATCTGGAAAA
2447546	-	58967.1	internal,	I:gene_id "EG12449"; gene_name "prmB";	AGTTTGATAACGGCGGCGATGGTGTGTTTATGCTCACCAAAGAGCAGCTTATTGCCGCACG
2449185	-	28730.8	primary, antisense,	P:gene_id "G7203"; gene_name "yfcO";,A:gene_id "G7202"; gene_name "smrB";	AGTTGTAGCCCTTAGATACACCAGGCAGGGGCATTCGCCCCTGCCATTACCCGTACCTGGC
2456835	-	68010	orphan		CCGGCCACCGTTTTCTTTCTCTGGTTTCAGATGAAAGAAAACGGGCGAATCTGGTTAACAA
2461244	+	956.073	orphan		ATACTCTCGCCACTGGTCTGATTTCTAAGATGTACCTCAGACCCTACACTTCGCGCTCCTG
2466383	+	2663855	primary,	P:gene_id "EG30016"; gene_name "argW";	CGAGCCCCTCCTAAGGGCTAATTGCAGGTTCGATTCCTGCAGGGGACACCATTTATCAGTT
2470466	-	323658	primary, antisense,	P:gene_id "G0-16635"; gene_name "ryeG";,A:gene_id "G7221"; gene_name "yfdI";	AAATTAGGTTGGTATTATAGCTTGTGCGCGCCATGATTGGCGCGCAATTTAAACTTAGTGC
2470495	+	6388.33	primary, antisense,	P:gene_id "G7221"; gene_name "yfdI";,A:gene_id "G0-16635"; gene_name "ryeG";	AGCGATGTAAAGCACTAAGTTTAAATTGCGCGCCAATCATGGCGCGCACAAGCTATAATAC
2476597	+	4159.18	orphan		CCATTCCAATCAATCCCCTGCTGCTTCAAGTAGATGTCTGCAGGGGACACCATCCTTGTGT
2483701	+	7265.15	orphan		AGGAAGCTCAGATTTTCTTATTTTTATTGAGAAAATGAGATGACGCCTTATGTCTGTATTA
2484616	+	1026.56	internal,	I:gene_id "EG11610"; gene_name "evgS";	TCCCAAACGGCTACGTTGTTGCATACCGATTCGCAGCAACGGGTTCGTGGTATTAATGCTG
2495560	+	3167.69	orphan		CGTGGTTATGTCCTGACTAGTCTTTACACTCTTTACAGGAACCATTGTCGTACATGATGGC
2496632	+	889.975	antisense,	A:gene_id "G0-8906"; gene_name "tpke70";	TTTCCCTCCTCAAATCGGCCATAATAACCTCATGGTTTTTATGGCTTTTTTCTTAAGGTTT
2497040	+	1163.14	primary, antisense,	P:gene_id "G0-10647"; gene_name "ypdK";,A:gene_id "G7242"; gene_name "alaC";	TAAAAGCAAACTGTGCAATGAAAAACAGGAGCCATCAGGCTCCTGTTTGCATTTCTGACGA
2498307	-	64902.4	orphan		CAGCCACCATCGTGGCAGCGTCGCTCGGACGGTCCGGGCGCTAACGTTAATCTGAGGAAAT
2498722	+	810.723	internal,	I:gene_id "G7243"; gene_name "ypdA";	TGCACGAAATATTCAACATGCTGCTGGCGGTCTTCGATCGGGCAGCGTTAATGCTTATCTG
2512788	-	58778.9	orphan		GTCATCAATCTTTTCGTAGTCATAATCCTGGTCTATCAGAGAAATCACCACAATCCATTTA
2518156	-	1025045	primary,	P:gene_id "EG30011"; gene_name "alaW";	GCTTGCATGGCATGCAAGAGGTCAGCGGTTCGATCCCGCTTAGCTCCACCAAATTTTGCAC
2521009	+	252170	primary,	P:gene_id "EG30110"; gene_name "valU";	TCCCTTACAAGGAGGGGGTCGGCGGTTCGATCCCGTCATCACCCACCAACTACTTTATGTA
2531130	-	34005	internal,	I:gene_id "G7258"; gene_name "zipA";	CGCTTTACTGGTACATGGTTTCTGGACCAGCCGTAAAGAACGATCTTCTATGTTCCGCGAT
2532463	+	1039.71	internal,	I:gene_id "EG10192"; gene_name "cysK";	GTAAGATTTTTGAAGATAACTCGCTGACTATCGGTCACACGCCGCTGGTTCGCCTGAATCG
2533432	+	973.611	orphan		GCCAGCTTGTTAAAAATGCGTAAAAAAGCACCTTTTTAGGTGCTTTTTTGTGGCCTGCTTC
2533690	+	4035.74	orphan		GACTGTATTGCGCTCTTCGTGCGTCGCGTCTGTTAAAAACTGGCGCTAACAATACAGGCTA
2533852	+	2013.32	internal,	I:gene_id "EG10788"; gene_name "ptsH";	TCTGCACACCCGCCCTGCTGCCCAGTTTGTAAAAGAAGCTAAGGGCTTCACTTCTGAAATT
2534344	+	4282.27	internal,	I:gene_id "EG10789"; gene_name "ptsI";	ATTATGCTGCTCGAAGATGAGGAGCTGGAGCAGGAAATCATAGCCCTGATTAAAGATAAGC
2557370	+	17364.1	antisense,	A:gene_id "EG50006"; gene_name "eutB";	AGAAGAACAGTGACGGATCGCCCGCCCGTTTGGTCAGGCGACCGTTTGCCATAATGCCCAT
2560188	+	1436.3	orphan		ATCACCTGATAAGAAACCTGTATTCAATTTGCCGGATTCGTCCGGCTTTTCTTTTTCGCTA
2560305	-	58214.3	antisense,	A:gene_id "G7273"; gene_name "yffL";	AGCTTGTTTCTCATACCGCCCCCGGCATGTTGCAGCATTCCGGGGGCTTTTATTTGTGTTG
2581778	+	823.876	antisense,	A:gene_id "G7295"; gene_name "ypfG";	TTTTGTTTAACGGGTGATCCACAACGTGGGCCAGGCGTCTGGCCCATGCCAGTTATCGCAG
2597799	-	24774	primary,	P:gene_id "EG10658"; gene_name "bamC";	GGCTGCGTTTAGCAAGTAAAAATACAGGGCTGGAATCATCCGGCCCTTTTTTCTGATATGA
2599738	-	27128.8	internal,	I:gene_id "EG10205"; gene_name "dapA";	AGACACTTGTTTGCACAGAGGATGGCCCATGTTCACGGGAAGTATTGTCGCGATTGTTACT
2600994	+	8771.59	primary,	P:gene_id "EG10108"; gene_name "bcp";	CCTGATTACTTTGCTCCATTCCGTGCTGGCTGCGCTTGCGGCCAGCATACCTCACTTCTCG
2622916	+	766.548	primary,	P:gene_id "EG10799"; gene_name "purN";	CGAGTAATACCCCCGTAATTAAAGCGCCAGCTCTGCCGCTGGCGTTTTTCAATTCACCTGT
2629424	+	1440.69	internal,	I:gene_id "G7315"; gene_name "yfgG";	TTCTTTGGCCGTTTTATCTACTCGTCCGTCGGTGCCTGGCAGCACCATCAGAGCAAAAAAG
2629573	+	4079.92	orphan		CTGTCGGATGCTTTTGCTGTTTGGGATTATCAAAGCGGCAGATATTCTTTCATCTTAAATT
2634252	+	1246.77	internal,	I:gene_id "EG11072"; gene_name "xseA";	CCTGCTGATTTAGAATTTGATCTCGCTCACATGTTACCTTCTCAATCCCCTGCAATTTTTA
2637422	-	40316.8	orphan		CGTCTCTGTCGTTCACTTTGAAAACGGCTCCTGGACAGGGGCCGTTTTCCTGTTTTTAACA
2640283	-	163052	internal,	I:gene_id "EG10453"; gene_name "hisS";	CCCTGAAGGGACGGCGGGCTGTGTACGCGCCGGCATCGAGCATGGTCTTCTGTACAATCAG
2640434	-	27505.1	internal,	I:gene_id "EG10453"; gene_name "hisS";	ACGTGCTCGGCAGCTACGGTTACAGTGAAATCCGCTTGCCGATTGTAGAGCAGACCCCGCT
2641079	-	27317	internal,	I:gene_id "EG10370"; gene_name "ispG";	CTGCTGCTGTCTGAAGGCATCGGCGACACGCTGCGCGTATCGCTGGCGGCCGATCCGGTCG
2642944	-	31462	orphan		AAGTTAGCCTTAGTGAATGTGGGCTTTGTCACGAGCACACAGACGGTCTTATACTGTATGA
2644336	-	45402.8	orphan		TTTGTACAATGCAGCGCCCCCGGACGAGCAGCCGCTCACCGGGGCGTTTCTTTTTTCAACC
2653354	-	34005	antisense,	A:gene_id "EG11600"; gene_name "sseA";	GCCGCGAACCAGACTAGCAATAAAAAACCGCCAAATTCGGCGGTTTTTTATTGCCTGTAAA
2653679	-	208460	antisense,	A:gene_id "G0-8908"; gene_name "IS128";	CCGCGAACCGGACCAGCAACAAAAAACCGCCTGATTTTGGCGGTTTTTTGTTTTTTAAAGG
2654157	+	5242.73	internal, antisense,	I:gene_id "G0-8879"; gene_name "ryfA";,A:gene_id "EG11601"; gene_name "sseB";	ACCTTCAGAGCAGCAAGTAAGCCCGAATGCCGCCCTTTGGGCGGCATATTTTAGATTATCC
2663282	-	88262.5	internal,	I:gene_id "G7327"; gene_name "trmJ";	AGAAAGACAATGCTGCAAAATATTCGAATTGTGCTGGTGGAGACGTCACACACCGGCAATA
2663492	+	1224.85	internal,	I:gene_id "EG10983"; gene_name "suhB";	ATGCATCCGATGCTGAACATCGCCGTGCGCGCAGCGCGCAAGGCGGGTAATTTAATTGCCA
2664280	+	1030.94	primary,	P:gene_id "EG10983"; gene_name "suhB";	CGCTCTGAAGCGTTAATGACTCAGGCGGGTGATATCACTCACCCGCCCTCGCCTTTCAGGC
2684070	-	196966	antisense,	A:gene_id "G7344"; gene_name "yphH";	AGGCAATTTTTCGTTTATGATCATCAAGGCTTCCTTCGGGAAGCCTTTCTACGTTATCGCG
2684763	-	31650.2	internal,	I:gene_id "EG10408"; gene_name "glyA";	CGGGTCCGCGCGGCGGCCTGATCCTGGCGAAAGGTGGTAGCGAAGAGCTGTACAAAAAACT
2687028	-	78746.9	primary, antisense,	P:gene_id "EG10384"; gene_name "glnB";,A:gene_id "EG10456"; gene_name "hmp";	GCAATTTAAACCGCGTCAAGGGTTGCCGGATGTTTCCATCCGGCAACATCAAATTACAGCA
2691193	-	20904900	internal,	I:gene_id "G0-8910"; gene_name "glmY";	CAGCGTAGCTATATCAACCATCGGGCGAAACGTCGAGTTAGGCACCGCCTTATTCCATAAC
2700059	-	218256	orphan		AAACGTACTTAAGGTGCGTCCGGTGAACCAGTCGGACGCACCTTTAATAACTATAAATAAG
2700341	-	41445.9	orphan		ATTAAAATTGGCTTCGTTATTGAAGATTTTGCTGTGCTTTACACCATGCCACAGAATTCCC
2700594	+	1030.94	internal, antisense,	I:gene_id "G0-10598"; gene_name "ohsC";,A:gene_id "EG10247"; gene_name "acpS";	TTAAAGTTAAAAAGTAAAACCCCCGTTCCTTACCAGTTCGGGGGTTTTACTTTTTAAAGAG
2704184	-	281460	orphan		AATATTCCCCCGAAGTTTAAGGTTGGCACCTCCAGGTTGCCACGGCACACGAAACAGCGTT
2709556	-	105687	internal,	I:gene_id "EG11897"; gene_name "rpoE";	AGTCCCTCCCGGAAGATTTACGCATGGCAATAACCTTGCGGGAGCTGGATGGCCTGAGCTA
2709886	-	24962.1	internal,	I:gene_id "EG11897"; gene_name "rpoE";	TAGTGCGCTATCAGCATAAAGTGGCGAGTCTGGTTTCCCGCTATGTGCCGTCGGGTGATGT
2710141	-	29295.3	orphan		GATTCTGTAGACTTATAATGATAGATAATGATCCGTCTACAGCATGACAAACAAAAACAGA
2719186	+	1229.24	primary,	P:gene_id "EG11887"; gene_name "trxC";	GCTGAACGAATCTCTTTAATCTTACCGGGGCGCATCTTGTGCCCCGTTTTCTCCTCTGCGA
2724349	-	109832	antisense,	A:gene_id "EG12857"; gene_name "yfiM";	TCCCAGGCCAAATCCTTCCAGCTCCAGCCGCTCCCTTCGGGGCGGCTATCCCAAAGCTCTT
2725142	-	24397.5	internal,	I:gene_id "EG10522"; gene_name "kgtP";	CACCATGGAAGACGCTGCACTCAGAGAGTGGGGATGGCGTATTCCTTTCGCGTTAGGAGCT
2725589	-	105499	internal,	I:gene_id "EG10522"; gene_name "kgtP";	CGATTTCTATGTCTACTCGTTCTGTTCACTCTACTTTGCCCACATCTTCTTCCCTTCCGGG
2726060	+	1000.25	antisense,	A:gene_id "EG30075"; gene_name "rrfG";	ATTTTTTTCTGCGCCAATGCAAAAAGGCCATCCGTCAGGATGGCCTTTCGCATAATTTGAT
2729192	-	443108	orphan		TTGTTCGTGAGTCTCTCAAATTTTCGCAACTCTGAAGTGAAACATCTTCGGGTTGTGAGGT
2729331	-	230874	primary,	P:gene_id "EG30035"; gene_name "gltW";	CTAGGGGACGCCACTTGCTGGTTTGTGAGTGAAAGTCGCCGACCTCAATATCTCAAAACAG
2729478	-	48510.3	orphan		AAGAGAATAAGGCCGTTCGCTTTCTATTAATGAAAGCTCACCCTACACGAAAATATCACGC
2731408	-	930291	orphan		ATGCGCCACCACTGACACGGAACAACGGCAAACACGCCGCCGGGTCGGCGGGGTTCTCCTG
2734153	-	54042750	primary, internal,	P:gene_id "G0-10600"; gene_name "ryfD";,I:gene_id "EG10157"; gene_name "clpB";	TAGCAACTTTGATCCGTTATGGGAGGAGTTATGCGTCTGGATCGTCTTACTAATAAATTCC
2737230	+	1312.87	internal,	I:gene_id "EG11151"; gene_name "raiA";	AATGGAAATTACTCCGGCCATCCGCCAACATGTCGCAGACCGTCTCGCCAAACTGGAAAAA
2737663	+	4965.51	primary,	P:gene_id "EG11271"; gene_name "pheL";	GTTTTTCTTCGCATTCTTTTTTACCTTCCCCTGAATGGGAGGCGTTTCGTCGTGTGAAACA
2741872	+	1238.01	orphan		GCATTCTGAAAAAATATCGATGCATTTCGAGCGAAGATGGTGGGGATCCCTGAATGCGTTT
2744124	-	95326.9	antisense,	A:gene_id "EG11152"; gene_name "yfiB";	TTAAGCGACATCCTGTTAAGAAGGGCTGGCCAATTGGCTGGCCCTTTTTTATCTGTTTGCT
2744357	-	34381.4	internal,	I:gene_id "EG10880"; gene_name "rplS";	GCATTCGAGGGCGTGGTTATCGCTATTCGTAACCGCGGTCTGCACTCTGCATTCACTGTTC
2745857	-	38714.7	internal,	I:gene_id "EG11153"; gene_name "rimM";	ACTCACCGCGCAAGCACCTGTTGATCCCATCGTTTTGGGAAAAATGGGTTCGTCTTACGGT
2745987	-	75638.9	internal,	I:gene_id "EG10915"; gene_name "rpsP";	CTCGCCTGGATCTGGATCGCATCGCTCACTGGGTTGGCCAGGGCGCAACTATTTCTGATCG
2746203	-	43424.3	orphan		CTTTTAATATGACACCGGACTCCGTTCCTCGATGGGGTCCGGTTGTTTTATTCACACAAGA
2750062	-	38150.1	antisense,	A:gene_id "EG12442"; gene_name "yfjD";	TCTGCTTTCGTAATAATTCACGGCCCTGCATGCGAATGCCGGGCCGTTTTCGTTACTCCGC
2753606	+	766.548	internal,	I:gene_id "EG10952"; gene_name "bamE";	TTACAGATGAGCCACGTACTGCTCGGGCCCGAAAAGGAATCAAATCACTATGCGCTGTAAA
2754961	+	744.624	internal,	I:gene_id "EG11782"; gene_name "smpB";	GCACATAAACCTGGTTCAGCGACCATCGCGCTTAACAAGCGCGCCCGTCACGAATACTTTA
2755636	+	6045.01	internal,	I:gene_id "EG30100"; gene_name "ssrA";	ACACATTGGGGCTGATTCTGGATTCGACGGGATTTGCGAAACCCAAGGTGCATGCCGAGGG
2755955	+	927010	primary,	P:gene_id "EG30100"; gene_name "ssrA";	CCGAGGATGTAGGAATTTCGGACGCGGGTTCAACTCCCGCCAGCTCCACCAAAATTCTCCA
2761607	-	27317	internal,	I:gene_id "G7362"; gene_name "abpB";	CAGCTTGATGGAGGATGTAGTTAAACACCACGCTGTAAAGCGTGGTATACGCAGCAAAGTC
2766731	+	942.918	internal,	I:gene_id "G7365"; gene_name "rnlA";	GCACCATTGAAGGTGTCTTAAAAAGTAAGATGAGTGGGTTAGGCATGCCAGTACAGCAGCC
2766897	+	1519.94	internal,	I:gene_id "G7365"; gene_name "rnlA";	CTATACTTTTTTTAATGTGGAACGTCATTCTCTGTTCCACATGGAAACTGTGGTCGATGCC
2785762	-	54069.3	primary,	P:gene_id "G7387"; gene_name "ileY";	AGGCGACTCATAATCGCTTGGTCGCTGGTTCAAGTCCAGCAAGGGCCACCAAATCATTATT
2796240	-	277782	antisense,	A:gene_id "EG12386"; gene_name "csiR";	AAATGCTGGCGCATTAACTCACTGGCGCGCGCGGTATCTCGCGCCAGTACCGCCGCAGTCA
2796831	-	72907.9	primary,	P:gene_id "G7396"; gene_name "yqaE";	ACCCGCGATTAAACCTGTGCTCATCCCCGCGGCGTTAACGCGCCGCGTTCCTCTGCTACAC
2798055	-	93160.4	primary, antisense,	P:gene_id "EG11554"; gene_name "stpA";,A:gene_id "G7398"; gene_name "ygaP";	GATTTCCTGATCTAATTACTGAGGCCGGATGTCGCTGCTAGGGCGCGTCCGGCGTCGCTTC
2798243	-	51241.6	internal,	I:gene_id "EG11554"; gene_name "stpA";	ACGGAATTAACCCGGAAGAGTTATTGGGTAATAGCTCTGCTGCTGCACCACGCGCTGGTAA
2798385	-	38526.5	internal,	I:gene_id "EG11554"; gene_name "stpA";	TTCTCCATTGACGTTCTTGAAGAAATGCTCGAAAAATTCAGGGTTGTCACTAAAGAAAGAC
2800532	+	3167.69	orphan		AATGATAATAAATACGCGTCTTTGACCCCGAAGCCTGTCTTCGGGGTTTCTTTTTGCCTGG
2800553	-	63300.3	orphan		AATAGTGGTCGAAATTACCCTGGATATGAGCGTGACGGGGTAGGGGGATTTTTGTGATTCA
2804606	+	1872.36	orphan		TGATACTCTGTTGCATTATTCGCCTGAAACCACAATATTCAGGCGTTTTTTCGCTATCTTT
2805035	+	1299.72	internal,	I:gene_id "EG10771"; gene_name "proV";	TGTCATCATGGGATTATCCGGCTCGGGTAAATCCACAATGGTACGCCTTCTCAATCGCCTG
2809703	+	1423.15	internal,	I:gene_id "G7405"; gene_name "ygaZ";	GCGACCTTCATGGAAGGATGCAAAGACAGTTTACCGATTGTTATTAGTTATATTCCGGTGG
2814160	-	146945	antisense,	A:gene_id "EG11439"; gene_name "emrB";	ACTATCTTCACAATTAATTGAAAAAAGCCAGTTCAAATGAACTGGCTTAGTTGTACTTAGT
2814847	-	177654	primary, antisense,	P:gene_id "EG10418"; gene_name "gshA";,A:gene_id "G0-8866"; gene_name "micA";	GAAAAACACGCCTGACAGAAAAGAAAAAGGCCACTCGTGAGTGGCCAAAATTTCATCTCTG
2814877	+	122784	primary, antisense,	P:gene_id "G0-8866"; gene_name "micA";,A:gene_id "EG10418"; gene_name "gshA";	TCCCTGAATTCAGAGATGAAATTTTGGCCACTCACGAGTGGCCTTTTTCTTTTCTGTCAGG
2817684	-	99660.2	orphan		AACCGCAGGCACCAGGAAGGATAACGTTGCGCCAGCAACGGCCCGAAGGGCGAACGTCAGT
2817959	-	81386.2	orphan		AACCGCAGGCACTAGGGATGATAACGTTGCTTTAGCAACGGCCCGAAGGGCGAGCCGCAAG
2818194	-	703080	primary,	P:gene_id "EG30018"; gene_name "argY";	GGCTACGAACCGAGCGGTCGGAGGTTCGAATCCTCCCGGATGCACCATCTCTTACTTGATA
2818553	-	420043000	primary,	P:gene_id "EG30095"; gene_name "serV";	AGTATGCGGTCAAAAGCTGCATCCGGGGTTCGAATCCCCGCCTCACCGCCATTTGCATCCG
2818923	-	733316	primary,	P:gene_id "EG11447"; gene_name "csrA";	GTCCAGTTACTAATCTTTCCGCGTCTCATCTTTATCGGTGAGACGCACCCTCAAAATTTCT
2819109	-	80160.6	internal,	I:gene_id "EG11447"; gene_name "csrA";	CAAGGAGCAAAGAATGCTGATTCTGACTCGTCGAGTTGGTGAGACCCTCATGATTGGGGAT
2822664	-	103052	primary,	P:gene_id "EG10823"; gene_name "recA";	TTTTTAATCGTCTTGTTTGATACACAAGGGTCGCATCTGCGGCCCTTTTGCTTTTTTAAGT
2867038	-	40504.9	internal,	I:gene_id "EG10510"; gene_name "rpoS";	AACGGGCGATTATGAACCAAACCCGTACTATTCGTTTGCCGATTCACATCGTAAAGGAGCT
2867990	-	64714.2	internal,	I:gene_id "EG12111"; gene_name "nlpD";	ACCAACAGCAAGCACAACCGAGCCGACTGTCAGCAGTACATCAACCAGTACGCCTATCTCC
2869426	-	31273.8	internal,	I:gene_id "EG10689"; gene_name "pcm";	CGCAAGGTATTCAGGATGAGCAGGTGCTGAATGCACTTGCCGCCGTGCCGCGTGAAAAATT
2887407	+	3705.25	internal,	I:gene_id "G0-10695"; gene_name "sokX";	GGGTTCGAACGCTGGCCTCAGGTTGATAGAAATATCGCCTGGGGCTTTTGTCCATCTGGAA
2888409	-	31650.2	internal,	I:gene_id "EG10190"; gene_name "cysI";	CTTCGGCGACTTTACGGTGCGTGCGGGCATCATTCGCCCGGTGCTCGATCCGGCGCGTGAT
2904041	+	4242.81	orphan		AAAGAGATAACGGGTTATATGGTGGTTTATCCCCGCTGGCGCGGGGAACTCGACAGAACGG
2904075	-	26940.5	orphan		AGTCCATAGATTTGCGAAAACAGGTGTTCCCCGCGCCAGCGGGGATAAACCGGAGCCTGAC
2904326	-	51338.1	orphan		AAAAACCGGGCAATCGCAAAAAGGCGTAATGTGTTCCCCGCGCCAGCGGGGATAAACCTGT
2908707	-	27881.5	internal,	I:gene_id "EG10810"; gene_name "pyrG";	GCTTATAAATCAGTGATCGAAGCACTGAAACACGGTGGGCTGAAGAATCGTGTCAGCGTCA
2909626	-	296442	internal,	I:gene_id "EG10810"; gene_name "pyrG";	CAGGTTCAGCATGACAACGAACTATATTTTTGTGACCGGCGGGGTCGTATCCTCTCTGGGT
2913710	-	66880.9	internal,	I:gene_id "EG11247"; gene_name "rlmD";	TGGATATGTTCCCACACACGGGACATCTGGAATCGATGGTACTTTTCTCGCGCGTTAAATA
2924161	-	2036060	internal,	I:gene_id "G0-8785"; gene_name "csrB";	GGAATGCTGCGAAACGAACCGGGAGCGCTGTGAATACAGTGCTCCCTTTTTTTATTCCTGC
2930978	+	1233.62	primary, internal,	P:gene_id "EG11623"; gene_name "sdaB";,I:gene_id "EG12372"; gene_name "ygdG";	CGTTGCCTGCGATTAATCGCTCTCCAAAGGCCTCGTTTTGCGAGGCCTCTTCCCGATTTCT
2940106	-	32403	primary, antisense,	P:gene_id "EG11794"; gene_name "rlmM";,A:gene_id "EG10353"; gene_name "fucR";	GCGACGAGCGATAACAGGCAAGGCCGGGGCGTCGTCTCCGGCCTGCTACCCTTTCCGTCAG
2942763	+	1691.93	internal,	I:gene_id "G0-8867"; gene_name "gcvB";	GAAAAGTTTTATCGGAATGCGTGTTCTGGTGAACTTTTGGCTTACGGTTGTGATGTTGTGT
2942870	-	441780	primary, antisense,	P:gene_id "G7453"; gene_name "ygdI";,A:gene_id "G0-8867"; gene_name "gcvB";	TAATTCGCGATCGCAAGGTAAAAAAAAGCACCGCAATTAGGCGGTGCTACATTAATCACTA
2945008	+	960.457	primary, antisense,	P:gene_id "G7455"; gene_name "csdE";,A:gene_id "G7456"; gene_name "tcdA";	GATTATCGCTGCGACGAAGCAGGTTTAAGCACAGAACCGGGTCGGATAAGACGTTCGCGTC
2946049	+	956.073	antisense,	A:gene_id "G7457"; gene_name "mltA";	AACGCGCACTTAGTCAATAATCAGGATGTGAGGTTACCCCTCACCCTGTCATATCCGTAAA
2947053	-	31838.4	internal,	I:gene_id "G7457"; gene_name "mltA";	ACCGATCGCGGACAGCAATATAAAGACGGGAAATTTACCCAGCCTTTCTCTCTGGTGAACC
2947469	+	3916.7	primary,	P:gene_id "EG30062"; gene_name "metZ";	CTCATAACCCGAAGGTCGTCGGTTCAAATCCGGCCCCCGCAACCAATTAAAATTTGATGAA
2947715	+	5044.77	primary, antisense,	P:gene_id "EG30060"; gene_name "metV";,A:gene_id "G7458"; gene_name "amiC";	AATCCGGCCCCCGCAACCAATTATTGAACACCCTAACGGGTGTTTTTTTGTTTCTGGTCTC
2971521	+	6855.06	primary,	P:gene_id "G7461"; gene_name "ygdR";	GCAAATTATTGAACGTTAACAAATAAGGTCAGCATCCGGCTGGCCTTAAGATTTTTCTCTT
2976103	-	52279.1	internal,	I:gene_id "G0-8868"; gene_name "omrA";	TCTTCGTACCCTGTCTCTTGCACCAACCTGCGCGGATGCGCAGGTTTTTTTTCGCACCTAA
2976306	-	92031.1	internal,	I:gene_id "G0-8882"; gene_name "omrB";	TCGGGTTGAGCACATGAATTACACCAGCCTGCGCAGATGCGCAGGTTTTTTTTGCCGGTCA
2980766	-	40693.1	internal,	I:gene_id "EG10056"; gene_name "araE";	ATATCGAACGCAAACTGATGGCAGGCGAGAAGTTGAGAAATATCGGCGTCTGATTTCACGG
2987128	+	881.207	orphan		ATCAGTTGTGGATGGTTCAAAATTGCTACAATTTTGAACCATTCCATTTTTCATAATATTC
2988499	+	819.491	orphan		TACTTAGCAAACTATGTGATCTCCATTTCGATTGATTTAGTGTTTATTGACGTATGTACTG
2998984	-	137086000	primary,	P:gene_id "EG30037"; gene_name "glyU";	CGAGAGCTTCCCAAGCTCTATACGAGGGTTCGATTCCCTTCGCCCGCTCCAATTTATCTTC
3034626	-	24962.1	internal,	I:gene_id "EG10552"; gene_name "lysS";	TATCGTCAGCGTTATCTCGATCTCATCTCCAACGATGAATCCCGCAACACCTTTAAAGTGC
3040416	+	1449.46	primary, antisense,	P:gene_id "EG12697"; gene_name "fldB";,A:gene_id "G7509"; gene_name "cptA";	ATTACGCCTGATCTCACTGACGGCTTAGCGCATATGCTTTGCCGTCATCTTTATCTTTGCG
3049097	-	34569.6	orphan		TCTTCTGCGGGAGAGGATCAGGGTGAGGAAAATTTATGCCTCACCCTCACTCTCTTCGTAA
3056166	+	619321	primary,	P:gene_id "EG30099"; gene_name "ssrS";	TTGAACCAAGGGTTCAAGGGTTACAGCCTGCGGCGGCATCTCGGAGATTCCCTTCTTATCT
3056785	-	106913	antisense,	A:gene_id "EG11158"; gene_name "fau";	TCAAAGAATCAACGATGTCAATCAGGGCGATGCGGGTGTATCGCCCTTACCACTCCCAGAC
3056959	+	360040	internal, antisense,	I:gene_id "G0-8886"; gene_name "sibC";,A:gene_id "G0-10631"; gene_name "ibsC";	ATGAGTAACAGTACAATCAGTATGATGACAAGTCGCATCATAACCCTTCTCCTTCAAGCCC
3057129	-	31838.4	primary,	P:gene_id "EG10944"; gene_name "serA";	AATTCCCCTTCTCTGAAAATCAACGGGCAGGTCACTGACTTGCCCGTTTTTTTATCCCTTC
3058243	-	71590.5	internal,	I:gene_id "EG10944"; gene_name "serA";	GGCGCGCTGGATGATGAACAATTAAAAGAATCCATCCGCGATGCCCACTTCATCGGCCTGC
3058407	-	50300.6	internal,	I:gene_id "EG10944"; gene_name "serA";	GCGGATGCAAATCCGCACACAACATTTCAAAAGACAGGATTGGGTAAATGGCAAAGGTATC
3068909	-	91746.7	primary,	P:gene_id "EG11160"; gene_name "mscS";	CAAAGCTGCGTAATCAACGCTGAGGCCAGATAATACTCTCTGGCCTCTCTCTTATTAGTTT
3070119	-	120854	primary,	P:gene_id "EG10282"; gene_name "fbaA";	TGTAAGATATTCCTTTCTGCTTATCTCAAGGCCCGCTCTGCGGGTCTTTTTTTCGCCAAAA
3071314	-	35983.4	orphan		ACAAGAGAGTGAATCCCCAGGAGCTTACATAAGTAAGTGACTGGGGTGAGCGAACGCAGAC
3071427	-	45214.6	primary,	P:gene_id "EG10703"; gene_name "pgk";	AGAGCGCGCTAAGAAGTAAAAAATCACAGGGCAGGGAAACCTGCCCTTGTTTCAGCGCGCT
3072734	-	324604	internal,	I:gene_id "EG10368"; gene_name "epd";	GGGTCAGTGGCGCACACCTGATCAAAACGTTGGTCTGGTGCGATAACGAATGGGGCTTTGC
3073682	-	33816.8	internal,	I:gene_id "EG10368"; gene_name "epd";	TGTCTGGCAAATTTGCTCAGGGAAAACCTTGCAGGAGATCTATGACCGTACGCGTAGCGAT
3081656	-	29483.6	orphan		CGGCGTAGCCCAAAACGCGCTGTCGTCAAGTCGTTAAGGGCGTGCCCTTCATCATCCGATC
3083827	-	31650.2	orphan		TGACAAATCCAACCCTTCCTCGTCGGGCCTAACGACGCGGAAGGGTTTTTTTATATCGACT
3093135	+	1378.97	internal,	I:gene_id "G7524"; gene_name "yqgE";	GGATTCTGGAAAAGCTGAAGATCACGCCGGAGCCGCGTGATGAATCAATCCGTCTGGATAA
3101639	-	99848.6	orphan		AACGCGTACTTTGTTATCAATCTGGGGCCAGCAAATGCTGGCCTGATTTTTTCTTGAGGGA
3102207	-	41918.8	internal,	I:gene_id "EG11779"; gene_name "trmI";	AAAACCTGTCAGAGAGCAATGATTACGTACCGCGTCCGGCATCACGTCCGGTGACGAAATT
3104066	+	810.723	primary,	P:gene_id "EG10627"; gene_name "mutY";	CTCCCGTGGAGCGTTTGTTACAGCAGTTACGCACTGGCGCGCCGGTTTAGCGCGTGAGTCG
3104399	+	964.843	primary,	P:gene_id "G7532"; gene_name "yggX";	CGCCGGAAGATAAAAAATAAAAACAGTGCCGGAGCACGCCTCCGGCAACTTGCATAAAAAC
3110443	+	2646555	primary,	P:gene_id "EG30065"; gene_name "pheV";	GGGATTGAAAATCCCCGTGTCCTTGGTTCGATTCCGAGTCCGGGCACCACTAATTCTTAAG
3148944	-	27505.1	primary, antisense,	P:gene_id "G7559"; gene_name "yqhA";,A:gene_id "G7558"; gene_name "yghZ";	ACTCGTCATAATCACTGATCTGATTCGGGCGCGGTTCGCGCGCCCGTTATTAACAGGTCAT
3151150	-	31838.4	internal,	I:gene_id "EG10272"; gene_name "exbD";	TGCATGATATCAACGTGACGCCGTTTATCGACGTGATGTTGGTTCTGCTGATTATCTTTAT
3151678	-	361620	internal,	I:gene_id "EG10271"; gene_name "exbB";	ATTTGCTCAATGAAGCGCAGAATGAGCTGGAACTGTCAGAAGGCAGCGACGATAACGAAGG
3151931	-	32403	internal,	I:gene_id "EG10271"; gene_name "exbB";	GGTAATAATTTAATGCAGACGGACCTTTCCGTCTGGGGTATGTATCAGCACGCCGATATTG
3153632	+	1564.12	internal,	I:gene_id "EG11824"; gene_name "yghB";	TCATCGCTGCGCTCTGGCAACACGACTTTGCCGCGCTGGCGGATCCTCATATTGTTAGCGT
3163495	-	47569.4	orphan		ACAATGCCCTAACCTGATTTCAGGTGACGTACAATGCCAGTCTCTCAGACCTTCAGAGGGT
3164471	-	27693.3	internal,	I:gene_id "EG10686"; gene_name "parC";	GAAGCGAAAGCGATGAGCGAGCACGACATGCTGCCGTCTGAACCTGTCACCATTGTGCTGT
3169250	-	56988.7	primary,	P:gene_id "G7574"; gene_name "ygiW";	GCAAAGTAAATCCGTAATTGTTACCGCTCCCGGGACGCGTTCCCGGGAATAATTTCGCAGG
3173465	-	25714.9	primary, antisense,	P:gene_id "EG10687"; gene_name "parE";,A:gene_id "EG12657"; gene_name "ygiN";	ATTGAGGTTTAAAGGAAAGAACATTGCCCGGTCAGGATGGCCGGGCAAACAAGGCAGGATT
3173495	+	1647.75	primary, antisense,	P:gene_id "EG12657"; gene_name "ygiN";,A:gene_id "EG10687"; gene_name "parE";	CCAGGGATTTAATCCTGCCTTGTTTGCCCGGCCATCCTGACCGGGCAATGTTCTTTCCTTT
3179628	+	1599.19	primary, internal,	P:gene_id "EG11009"; gene_name "tolC";,I:gene_id "EG11163"; gene_name "ygiA";	TAACCCTTTCCGTAACTGATGACGACGACGGGGCTTCGGCCCCGTCTGAACGTAAGGCAAC
3184450	-	39467.4	internal,	I:gene_id "EG10465"; gene_name "ribB";	CTGGTAACCATAATTTTAGTGAGGTTTTTTTACCATGAATCAGACGCTACTTTCCTCTTTT
3184566	-	625838	orphan		TGTAATTCCGGGGCCGACGGTTAGAGTCCGGATGGGAGAGAGTAACGATTCTGTCGGGCAT
3184678	-	76112	orphan		TAGTGAATCCGCTTATTCTCAGGGCGGGGCGAAATTCCCCACCGGCGGTAAATCAACTCAG
3185189	+	2339.43	orphan		CTTTAATGCACTGTAAATTATGAATTAATCCTCTAATTTATAGTGCTTTCTATTACCTTAT
3191713	-	114262	primary, antisense,	P:gene_id "EG11381"; gene_name "glgS";,A:gene_id "G7587"; gene_name "yqiI";	AAGAGAGCTGGAGTTAGAGCACTGATATAACGGGCCTGATGGCCCGTTTTAGTGTTTGTAT
3194720	-	3573720	primary, antisense,	P:gene_id "G0-8913"; gene_name "sibD";,A:gene_id "G0-10630"; gene_name "ibsD";	ATCATAACCCTTTCCTTCTGTAAGGCCCCCTTCTTCGGGAGGGGCTTTCCCGTTTCAGCCC
3195129	-	4498445	internal, antisense,	I:gene_id "G0-10602"; gene_name "sibE";,A:gene_id "G0-10629"; gene_name "ibsE";	CAGTAACAACACAACCAGTATGATGACGAGCTTCATCATAACCCTTTCCTTATACAAGGCC
3210789	+	1171.91	internal,	I:gene_id "EG10920"; gene_name "rpsU";	TGATGCCAGCGGCAAACCGAATTAATCAAAGGTGAGAGGCACATGCCGGTAATTAAAGTAC
3211075	+	240796	orphan		ACCGAGTTGTAGTTGTAAGGCCGTGCTTCCGAAAGGAATGCGCGGCTTATTTTCGTTTATG
3211255	+	828.26	internal,	I:gene_id "EG10239"; gene_name "dnaG";	CAAGAATTTCCACGCGTGTTGTCCATTCCACAACGAGAAAACCCCGTCCTTCACCGTTAAC
3215673	+	308822	primary,	P:gene_id "EG30046"; gene_name "ileX";	AGGCGACTCATAATCGCTTGGTCGCTGGTTCAAGTCCAGCAGGGGCCACCAGATATAGCAA
3220914	+	815.107	primary, antisense,	P:gene_id "G7596"; gene_name "patA";,A:gene_id "G7597"; gene_name "ygjH";	AGAAGCGTAATATCAAATCGGATGGCGATACGACGTCGCCATCCGATCTTTTTATACGACG
3238482	+	11811.8	orphan		TCCGGTCACCGGGCAACCCGAAAGGAATACGCAGACGTATTCCTTTTTTGTTGTAAGTGAG
3239988	+	828.26	internal,	I:gene_id "EG12732"; gene_name "sstT";	CGAAAAATGACTACGCAACGTTCACCGGGGCTATTCCGGCGTCTGGCTCATGGCAGCCTGG
3245945	+	815.107	internal,	I:gene_id "EG12738"; gene_name "exuT";	GCGTAACCGTCAGTTCTGGGGTATCGCGCTGCCGCGTTTCCTGGCAGAACCGGCCTGGGGT
3246734	+	1837.28	internal,	I:gene_id "EG12739"; gene_name "exuR";	ACAACTTGCCGCTGACCTGAAAGAGCGCATCGAACAGGGCGTCTATCTGGTGGGTGATAAA
3248488	+	823.876	internal,	I:gene_id "G7610"; gene_name "mzrA";	GATGCAAATACCTCGCATGTCGCTTCGCCAGCTAGCCTGGTCCGGCGCTGTTTTACTTCTG
3250409	+	3066.18	primary,	P:gene_id "G7614"; gene_name "yqjK";	CAACAGCTTCGCGGTTAACTTCCCTCTGGCCGGAGCCATTCCGGCCTTATCCCTCAAATTT
3270216	-	6098725	primary,	P:gene_id "EG30069"; gene_name "rnpB";	TAGATGAATGACTGTCCACGACAGAACCCGGCTTATCGGTCAGTTTCACCTGATTTACGTA
3278140	-	40128.5	internal,	I:gene_id "G7630"; gene_name "agaR";	TGCGCCGTCAGTCGCAATCTTTTTACGGCGATCAGGCTGAGCAATCGCTGCAAAATTACCA
3286307	+	744.624	primary, internal,	P:gene_id "G7635"; gene_name "agaD";,I:gene_id "G7636"; gene_name "agaI";	CGGCATTTTGTAAATGGAACGAGGCACTGCGTCTGGTGGTGCCTCTTTACTTAAGGAATTT
3307973	-	38714.7	orphan		CCCGTAATCTTTTTTGATTGCCATCACCTTAACGGGTGAGGGCGTTGTTGTTCGTTAATAC
3308608	-	207234	internal,	I:gene_id "EG12371"; gene_name "nlpI";	GGCAATCCGACCGGATATGCCTGAAGTATTCAATTACTTAGGCATATATTTAACGCAGGCA
3311287	-	1337595	antisense,	A:gene_id "G0-8870"; gene_name "psrO";	GTATTGTTGCTATGAATGATCTTCCGTTGCAGAGGTTCGCGCGGCTAATGAGAGGCTTTAC
3311514	-	47569.4	internal,	I:gene_id "EG10914"; gene_name "rpsO";	GGCCACTTTGCAGAGCACAAAAAAGATCACCACAGCCGTCGTGGTCTGCTGCGCATGGTTT
3311708	-	484452	orphan		TTTGCGTAACGTACACTGGGATCGCTGAATTAGAGATCGGCGTCCTTTCATTCTATATACT
3318213	-	85084300	primary,	P:gene_id "EG30061"; gene_name "metY";	GTCGGGCTCATAACCCGAAGATCGTCGGTTCAAATCCGGCCCCCGCAACCACTTTCCCTTA
3320017	+	903.131	primary, antisense,	P:gene_id "EG10068"; gene_name "argG";,A:gene_id "G7655"; gene_name "yhbX";	ACAAAGGCCAGTAATTCGACATCAACCCTGCCCTTCAGGGGTGGGGTTACCTTGCTTATCC
3322072	-	87038950	primary,	P:gene_id "EG30050"; gene_name "leuU";	GGTGGTAGTGCCCAATAGGGCTTACGGGTTCAAGTCCCGTCCTCGGTACCAAATTCCAGAA
3322389	-	131498	internal,	I:gene_id "EG12095"; gene_name "secG";	CAGCAAGGTAAAGGCGCTGATATGGGAGCCTCCTTCGGAGCAGGCGCTTCCGCTACGCTGT
3327907	-	25338.5	antisense,	A:gene_id "EG12794"; gene_name "yhbY";	GCGATCTTCGGTGGCGATTTTCACCTTGATGAGTTCATGGTGCTCTAACGCTTGTTCAATC
3328068	-	33628.6	antisense,	A:gene_id "EG12794"; gene_name "yhbY";	TTTACACAGCAAATGTGTGTAACTTTAGGATAATCTTAGCGTGGCAGCGAGATTTTACGTT
3328197	+	23518	antisense,	A:gene_id "EG10415"; gene_name "greA";	AAAATGCCACGCTCTGTTCGTTGATAAAAGGCCGCATAGCGGCCTTTTTCCTTTCTTTACA
3328811	-	54257.4	orphan		AAAATGTGAATTGTAGCTGACCTGGGACTTGTACCCGGGTCGGTATTTTTTTGCTTCTGGT
3332824	-	44650	primary,	P:gene_id "EG50002"; gene_name "rpmA";	CGAAGCTGAATAAGTTTTTCGCGTCCCGGTAACGGATGAAAGCCCCGCAACACGTTGCGGG
3332961	-	27317	internal,	I:gene_id "EG50002"; gene_name "rpmA";	ATCGTTCGTCAACGTGGTACCAAATTCCACGCTGGCGCTAACGTAGGTTGCGGTCGTGACC
3333188	-	39091.1	internal,	I:gene_id "EG50001"; gene_name "rplU";	GTTAAAATCGTTAAGTTTCGTCGTCGTAAACACTATCGTAAGCAGCAGGGCCATCGTCAGT
3333458	-	43424.3	orphan		AATATTTATAGCGCACTCTGAATCATTGAAAAGGTGTGCGCGGAAGCGGAGTTTTATATGT
3335194	-	23548.2	primary, antisense,	P:gene_id "EG11358"; gene_name "murA";,A:gene_id "EG10656"; gene_name "sfsB";	AGGCGAATAATCGTCTGAGAGCTGGCAGCCCCGTTCGCGGGGCTACCGCCAGACCACTCAT
3336873	-	43236.2	orphan		CAAACCTGCCTGCAAGTCGAGCCTTGTCTGATTTATCAGCGAGGCTTTTTGCTTATTTATG
3342992	+	2106.05	internal,	I:gene_id "G7664"; gene_name "lptC";	ACAACAATGATCCCACCTATAAAAGCGAGCATACGGACACGCTCGTCTATAACCCAGAAGG
3348581	+	6084.48	internal,	I:gene_id "G7667"; gene_name "yrbL";	GCTGTATCAAGATTGTCTACCATCGTGGCGATGGTGGCGATAAAGAGATCCGCCGTGAGTT
3349182	+	5555.35	antisense,	A:gene_id "G7668"; gene_name "mtgA";	CTGCCGTAAAATCCACGCCTGACGGCTACGCACGTAGCCCGATGGCGAGGAGACTTTGAAA
3350696	+	76464.8	internal, antisense,	I:gene_id "G0-8871"; gene_name "arcZ";,A:gene_id "EG10062"; gene_name "arcB";	CCTGGTGTTGGCGCAGTATTCGCGCACCCCGGTCTAGCCGGGGTCATTTTTTAGTGGCTTT
3354141	+	889.975	internal,	I:gene_id "G0-10702"; gene_name " ";	CATTTTTAGCTCAATTCGGCGATGACCTGGATCAATCGTCCCGGCCTGCTTTTATCAACTG
3354657	+	1304.11	internal,	I:gene_id "EG10403"; gene_name "gltB";	AAGGGGGCGAATGCGAGGCGCGCGTATGACACGCAAACCCCGTCGCCACGCTCTTTCTGTG
3360660	+	956.073	primary,	P:gene_id "EG10404"; gene_name "gltD";	AGTTTAAGCGAGGTAACAATGAATTCGCCAGACTGTGTCTGGCGAATCAAATTACTGACGA
3360783	+	1859.2	orphan		TTTTCAATAAATTGTGCTTTGTTCACCAAGTCTGATGAGTGAAGCACATCAAGCAATTTCT
3367641	-	67633.6	internal, antisense,	I:gene_id "G0-10703"; gene_name " ";,A:gene_id "G7673"; gene_name "yhcF";	CCGATCGTATAAAACGAATGCCTGATAGTACTCCTGTCCGGCATTGTTATCACAAGTAGAC
3378723	-	540972	orphan		TTTTGTGTGCTGGCATAGGCTATTCGAAGGGGTAGGTTTGCCGGACTTTGTCGTGTGAACC
3380623	+	1995.79	primary,	P:gene_id "G7681"; gene_name "yhcB";	GCGCGAAGCGCGACTAATTTATTTTTCGGGCGCAGCCATTGCGCCCTCCTCTTCTCTCCCT
3384294	-	36736.2	orphan		AACGGCAATTTTGTGGATTAAGGTCGCGGCAGCGGAGCAACATATCTTAGTTTATCAATAT
3385823	-	58967.1	primary, antisense,	P:gene_id "G7684"; gene_name "yhcO";,A:gene_id "G7683"; gene_name "yhcN";	TTAATGTTCGTCATTAGCGCAAAAAAAAGCCCCCGAACCGGGGGCAATATCGTCGGACAAG
3398013	-	27505.1	internal,	I:gene_id "EG11298"; gene_name "yhdE";	GCAGTGGCGTTGGCCGACAGCCAGCACATTCTCGATTGCCTGGTGGTCACCGATGTGACTT
3399996	-	36548.1	primary,	P:gene_id "EG10608"; gene_name "mreB";	TAATCGGATGCAGGCAGGGGAAGTGTCTGTTTACCCTGCCTGGTCTGATACGAGAATACGC
3410852	+	770.933	internal,	I:gene_id "EG11311"; gene_name "dusB";	TGTTTGTTCAATGGAGAAGCTGAGTACGACAGTATTCGGGCAGTTAAGCAGAAAGTTTCCA
3410995	+	1511.17	internal,	I:gene_id "EG11311"; gene_name "dusB";	GATAGGCCGCGCAGCTCAGGGAAGACCCTGGATCTTTCGGGAAATCCAGCATTATCTGGAC
3423244	+	823.876	primary,	P:gene_id "EG12837"; gene_name "yhdZ";	ATTGAATGTTAGTTCGAAAAGCAAAAAGGCCATCCTTTCGGATGGCCTTTCGCTTGATTTG
3423423	-	27882450	primary,	P:gene_id "EG30091"; gene_name "rrfF";	CCGATGGTAGTGTGGGGTCTCCCCATGCGAGAGTAGGGAACTGCCAGACATCAAATAAAAC
3423580	-	741395000	primary,	P:gene_id "EG30103"; gene_name "thrV";	GCACCCTTGGTAAGGGTGAGGTCCCCAGTTCGACTCTGGGTATCAGCACCACTTTTTAGGT
3426791	-	367748	orphan		TTGTTCGTGAGTCTCTCAAATTTTCGCAACTCTGAAGTGAAACATCTTCGGGTTGTGAGGT
3428984	-	106725	orphan		CGTGAAACACTTCACAGGATGGTCGGAACAACGAAGAGAAAAAAATCCTGAAATTCAGGGT
3431798	-	29483.6	internal,	I:gene_id "G7699"; gene_name "yrdD";	CCGGCGTGTGACTACGTCCGTCCTCTGAAATCTTCAGCGGATGGACATATCGTCAAAGTTC
3433856	+	938.535	internal,	I:gene_id "EG11440"; gene_name "def";	GTACGCAGAAGAAGGTATTGGCCTGGCGGCAACCCAGGTTGATATCCATCAACGTATCATT
3434288	+	1599.19	internal,	I:gene_id "EG11268"; gene_name "fmt";	TTTGCGGGTACACCTGACTTTGCAGCGCGTCATCTCGACGCGCTGTTGTCTTCTGGTCATA
3435199	+	753.393	primary,	P:gene_id "EG11268"; gene_name "fmt";	CCGTCTGGTCTGATAGTCCACTCTTCTAAGCCCGGTCTTGCCGGGCGTTTTTATACTTATG
3438498	+	6458.81	antisense,	A:gene_id "G0-10465"; gene_name "arfA";	GCAGAAGACCAGTGGTAAAAAAGTGATTTACTTTCTTGCCACTGGCCTCCCAGTTCCCCCG
3439862	-	39279.2	internal,	I:gene_id "EG10878"; gene_name "rplQ";	CGTCATGAAATCATCAAGACGACTCTGCCTAAAGCGAAAGAGCTGCGCCGCGTAGTTGAGC
3440022	-	25714.9	primary,	P:gene_id "EG10893"; gene_name "rpoA";	AACTGGCCACCGGCAAGCATCGCTGACGAGTAACCGGATCACAGGTTAAGGTTTTACTGAG
3440209	-	23171.9	internal,	I:gene_id "EG10893"; gene_name "rpoA";	TGACGATCTGGAATTGACTGTCCGCTCTGCTAACTGCCTTAAAGCAGAAGCTATCCACTAT
3441142	-	36171.7	internal,	I:gene_id "EG10903"; gene_name "rpsD";	GCTGAGCAGCGTGAAAAGCCAACCTGGCTGGAAGTTGATGCTGGCAAGATGGAAGGTACGT
3442149	-	32403	internal,	I:gene_id "EG10912"; gene_name "rpsM";	TCGTCGTGGTCTCCCGGTTCGCGGTCAGCGTACCAAGACCAACGCACGTACCCGTAAGGGT
3442438	-	300486	internal,	I:gene_id "EG10912"; gene_name "rpsM";	AATAGTAGGAGTGCATAGTGGCCCGTATAGCAGGCATTAACATTCCTGATCATAAGCATGC
3442556	-	97869.9	orphan		ATTTTTCTTGCAAAGTTGGGTTGAGCTGGCTAGATTAGCCAGCCAATCTTTTGTATGTCTG
3442846	-	119913	internal,	I:gene_id "EG10766"; gene_name "secY";	TCGGTGGGACCTCACTGCTTATCGTTGTTGTCGTGATTATGGACTTTATGGCTCAAGTGCA
3442976	-	29483.6	internal,	I:gene_id "EG10766"; gene_name "secY";	CCGGGAGAGCAAACGGCGAAGTATATCGATAAAGTAATGACCCGCCTGACCCTGGTTGGTG
3443246	-	79972.2	internal,	I:gene_id "EG10766"; gene_name "secY";	AAAGTGAATATGGCGGGGGTAATCCCGGCAATCTTCGCTTCCAGTATTATTCTGTTCCCGG
3443628	-	72907.9	internal,	I:gene_id "EG10766"; gene_name "secY";	GAATATGCCTGGTATGCAAGGCCTGGTGATTAACCCGGGCTTTGCATTCTACTTCACCGCT
3443881	-	23360.1	internal,	I:gene_id "EG10766"; gene_name "secY";	AGCGAGGCACCATCATTGAGATGTTTAACATGTTCTCTGGTGGTGCTCTCAGCCGTGCTTC
3444573	-	25338.5	internal,	I:gene_id "EG10888"; gene_name "rpmD";	CACACCGTAGAGCGCGAGGATACTCCTGCTATTCGCGGTATGATCAACGCGGTTTCCTTCA
3445946	-	24585.7	internal,	I:gene_id "EG10869"; gene_name "rplF";	ACCCTGACCTTCGGTCCGCGTGATGGTTACGCAGACGGTTGGGCACAGGCTGGTACCGCGC
3446365	-	27128.8	internal,	I:gene_id "EG10907"; gene_name "rpsH";	GTTTTATTGAAGATTTTAAAGTTGAAGGCGACACCAAGCCTGAACTGGAACTTACTCTGAA
3447180	-	48510.3	internal,	I:gene_id "EG10868"; gene_name "rplE";	CACGCAAATCTGTTGCAGGCTTCAAAATCCGTCAGGGCTATCCGATCGGCTGTAAAGTAAC
3447351	-	57176.8	internal,	I:gene_id "EG10868"; gene_name "rplE";	TTAAAAAACTCATGACTGAGTTTAACTACAATTCTGTCATGCAAGTCCCTCGGGTCGAGAA
3447623	-	29483.6	internal,	I:gene_id "EG10884"; gene_name "rplX";	GCAAGGTCATTGTTGAAGGTATCAACCTGGTTAAGAAACATCAGAAGCCGGTTCCGGCCCT
3448054	-	70553.1	internal,	I:gene_id "EG10875"; gene_name "rplN";	GCACGTCGCGTAATGTGTATCAAGGTTCTGGGTGGCTCGCACCGTCGCTACGCAGGCGTAG
3448365	-	59343.5	internal,	I:gene_id "EG10916"; gene_name "rpsQ";	GAATGCGGTATCGGTGACGTGGTTGAAATCCGCGAATGCCGTCCGCTGTCCAAGACTAAAT
3449100	-	39091.1	internal,	I:gene_id "EG10877"; gene_name "rplP";	CAAAATTCCGTAAAATGCACAAAGGCCGTAACCGCGGTCTGGCGCAGGGTACGGATGTTAG
3450367	-	459674	internal,	I:gene_id "EG10918"; gene_name "rpsS";	GTTCAACGATCTTTCCTAACATGATCGGTTTGACCATCGCTGTCCATAATGGTCGTCAGCA
3453304	-	1915400	orphan		AAGAACGGTTACACTCTCCCATCAATCGTAATGGGTCTGAGGAGTAATCATTTTCGTTTAT
3466218	-	196213	primary, antisense,	P:gene_id "EG10113"; gene_name "bfr";,A:gene_id "EG11359"; gene_name "gspO";	AGATCCGCGAAGAAGGTTGAGCCGTGTCGGGAGGGAGAACCCTCCCGGTTAATAAGAGATC
3466466	-	31650.2	internal,	I:gene_id "EG10113"; gene_name "bfr";	CTTACAGGACCTGGGCAAACTGAACATTGGTGAAGATGTTGAGGAAATGCTGCGTTCTGAT
3470093	-	75074.5	orphan		TACACGTTAATTAGTTTTGAATTGAAAAGGGCGCTTCGGCGCCCTTTTTGCATTTGTTGAC
3471431	-	42671.6	internal,	I:gene_id "EG10360"; gene_name "fusA";	ATCATACACTATGGAATTCCTGAAGTATGATGAAGCGCCGAGTAACGTTGCTCAGGCCGTA
3471536	-	85719.5	internal,	I:gene_id "EG10360"; gene_name "fusA";	AGGTCAGGAATCTGAAGTTACTGGCGTTAAGATCCACGCTGAAGTACCGCTGTCTGAAATG
3472562	-	27881.5	internal,	I:gene_id "EG10360"; gene_name "fusA";	CGGTAAAGACACTCCGGCTGAACGTCACGCAAGTGATGACGAGCCGTTCTCTGCACTGGCG
3473549	-	49547.8	internal,	I:gene_id "EG10906"; gene_name "rpsG";	TTTTAGTCACCAGGCGGGCGCTTCCAGTAAGCAGCCCGCTTTGGGCTACTTAAATTGAACG
3474593	-	154106	orphan		CGGCATCGCCCTAAAATTCGGCGTCCTCATATTGTGTGAGGACGTTTTATTACGTGTTTAC
3486051	+	2542.11	orphan		CATTACCGTGCAGTACAGTTGATAGCCCCTTCCCAGGTAGCGGGAAGCATATTTCGGCAAT
3486793	+	4198.64	primary, internal,	P:gene_id "EG10164"; gene_name "crp";,I:gene_id "G7721"; gene_name "yhfK";	CACTCGTTAATCCCGTCGGAGTGGCGCGTTACCTGGTAGCGCGCCATTTTGTTTCCCCCGA
3519005	-	45967.3	internal,	I:gene_id "EG10081"; gene_name "aroK";	AAACGCAATATCTTTCTGGTTGGGCCTATGGGTGCCGGAAAAAGCACTATTGGGCGCCAGT
3519136	-	41257.7	orphan		GTATTGAGATAATTTTCAGTCTGACTCTCGCAATATCTTATGAGGTTTCAGTTCATGTCCT
3519310	-	38902.9	orphan		TCGCTGCCTGCGTTCCATGATGATGATTTATCATTCAGGCGGCATTTTGCTGTCTTTTTTA
3526061	-	76864.8	internal,	I:gene_id "G7740"; gene_name "nudE";	TGAAACTGTAGCCCGTTCCCGACTGTTTACCGTCGAGAGCGTGGATCTGGAGTTCAGCAAT
3537339	+	977.997	orphan		GGAAGAGTCTTAACCTCCTGCCGATGGCTGGCATTTTTGCCAGCCAGTCCGTATAACTATC
3546256	+	757.778	orphan		CCCTCTTTTGTAGATTGCCCGATGCGACGCTAAAGCGTCATTTCGGGCCTACGTTGAACAT
3547980	+	1048.48	antisense,	A:gene_id "EG10561"; gene_name "malQ";	TGAATTAGTAGGCCGGATAAGACGCGTCAAGCATCGCATCCGGCATCAACCGCACTCTACT
3553123	+	744.624	internal,	I:gene_id "EG10562"; gene_name "malT";	AAGTGATTAACTATGCTGATTCCGTCAAAACTAAGTCGTCCGGTTCGACTCGACCATACCG
3573734	-	24962.1	primary,	P:gene_id "EG10088"; gene_name "asd";	ACTGGCGTAATCTTTATTCATTAAATCTGGGGCGCGATGCCGCCCCTGTTAGTGCGTAATA
3574776	-	37112.7	internal,	I:gene_id "EG10088"; gene_name "asd";	TGCAACGCATGGTTGAAGAGCGCGACTTCGACGCCATTCGCCCTGTCTTCTTTTCTACTTC
3578162	-	25150.3	internal,	I:gene_id "EG12630"; gene_name "gntR";	CCACTGCCATTATTGCTCGCGGGCATCGCCACATTGCCTATCTCGGCGCACGTCTCGACGA
3578650	-	59908.1	internal,	I:gene_id "EG12630"; gene_name "gntR";	GGATGTGGCTGACCGTGTAGGCGTGACCAAAATGACGGTCAGCCGTTTTTTACGCAACCCG
3579057	+	832.646	antisense,	A:gene_id "G7756"; gene_name "yhhW";	GATTGCCTGCTCATCCCAGATTGCCAGACCATCGCTGGTCGAGGCTTTCACGCCGTTAATG
3580923	-	2998725	primary,	P:gene_id "G0-8872"; gene_name "ryhB";	GCTCACATTGCTTCCAGTATTACTTAGCCAGCCGGGTGCTGGCTTTTTTTTTGATCTTTCG
3586994	+	2819.66	internal,	I:gene_id "EG11184"; gene_name "yhhA";	TGAAACGACTTCTGATTCTTACGGCACTCCTGCCGTTTGTCGGCTTTGCACAGCCCATTAA
3596418	-	27317	primary,	P:gene_id "EG10540"; gene_name "livK";	TCCACGGCAGCCAAGTGATCATCCCACCGCCCGTAAAATGCGGGCGGGTTTAGAAAGGTTA
3597520	-	34569.6	internal,	I:gene_id "EG10540"; gene_name "livK";	ATTTTTGACTATGAAACGGAATGCGAAAACTATCATCGCAGGGATGATTGCACTGGCAATT
3598392	-	39091.1	antisense,	A:gene_id "EG12211"; gene_name "panZ";	AAATTGCAACACACATTGTAGGCCTGATAAGCGTAGCGCATCAGGCAATATCACTTTTGAA
3600804	-	342878	orphan		GTTGCTCTTAAGCTCTGGCACAGTTGTTGCTACCACTGAAGCGCCAGAAGATATCGATTGA
3609217	+	1427.54	internal,	I:gene_id "EG12217"; gene_name "yhhQ";	TCGTACGTATTGGGTTCCCTCACCCCAATGGTTAATCAAAAAGGTACAATATGAACGTTTT
3609992	+	837.033	internal,	I:gene_id "G7767"; gene_name "dcrB";	AAGGAAGAAGTCAATGCGCAATCTGGTTAAATATGTCGGAATTGGCCTGCTGGTTATGGGG
3630837	-	175488	orphan		AACTGAACAGGCGTGAAACGCTATCCAACAGGATGGATACCGTTTTGTCAGCCAGTTTTAT
3637688	+	823.876	internal,	I:gene_id "EG12230"; gene_name "pitA";	TCCTATGCTACATTTGTTTGCTGGCCTGGATTTGCATACCGGGCTGTTATTATTGCTTGCA
3637810	+	1013.4	internal,	I:gene_id "EG12230"; gene_name "pitA";	CAACCGTTATCTATACCCGCGCGATGCGTTCTCAGCTCGCCGTGGTTATGGCGGCGGTATT
3639154	-	25150.3	antisense,	A:gene_id "EG12230"; gene_name "pitA";	ACAAAGCGCACTATGTCACAATCTGAAGCGGGCCAGCTGACCCGCTCGTTTTGGTGCGTAC
3639733	-	42671.6	orphan		GCAGCGTATCGGGAGCGGTAGCCCCGGGGTGGAACTCCGCGGGCAGGTCGCCGGGGAGGAG
3640022	+	2392.38	orphan		TAAGGTAAGGATGGTCTTAACACTGAATCTTTACGGCTGGGTTAGCCCCGCGCACGTAGTT
3640588	+	885.59	primary,	P:gene_id "EG11390"; gene_name "uspA";	AAGAATAATCTTCCCTCTACGACGTGTTCCTGAACGCCCGCATATGCGGGCGTTTTGCTTT
3647653	-	384232	antisense,	A:gene_id "EG10412"; gene_name "gor";	AGCGGAAACGTAATTAAGGGCTAAGAGCACACTACTCTTAGCCCTTTAACATTTAACGCAT
3647807	-	30048.2	orphan		GACATGCGCCGTGACAGGCAGTGGATGAGTAAGCGGATGCATTCTCACTCCATCGCATGGA
3648147	+	11468.8	primary,	P:gene_id "G0-10751"; gene_name "agrA";	CCAACTCAGGGCTGGAAAGTAAAAAACCGACGCAAAGTCGGTTTTTTTACATCCGGATTCG
3648377	+	1511.17	primary,	P:gene_id "G0-10752"; gene_name "agrB";	ACCAACTCAGGGCTGGAAAGTAAAAAACCGACGCAAAGTCGGTTTTTTTACGTCCTGATTC
3655911	-	193294	orphan		GTGCAAGTAAAAAGGAGTAGCAAGTTGAGCCATCTTGCTGCTCCTTTTTGCATTTTTATAT
3656318	-	406178	orphan		ACAGGCCGGAATATCTTCTTTAAAAGCAGCTATTCCTCCTGTTCATATATAATCTCTATAT
3656455	-	45590.9	internal,	I:gene_id "EG11398"; gene_name "hdeA";	TAACCCCAGCTATCGTTCAGGCTTGTACTCAGGATAAACAAGCCAACTTTAAAGATAAAGT
3657126	+	1502.4	internal,	I:gene_id "EG11495"; gene_name "hdeD";	GCCGTGCTGCTGTTTATCGTCGGGTTGCTGTGTATCAGTTTCCCGTTCGTCTCTGGCGATA
3657621	+	1149.98	orphan		CCCCGGTTGTCACCCGGATCATAGTCACTTGATGTGACTATGATCCGATTAATACTCTCTC
3657985	-	982952	primary,	P:gene_id "G0-10694"; gene_name "arrS";	GAGTCTCCTTGTTTCGACTTAAGCTGGCAATTGGATTGCCAGCTTTCTTTTAACGCATTGA
3658019	+	1431.92	antisense,	A:gene_id "G0-10694"; gene_name "arrS";	GTAATTTCAATGCGTTAAAAGAAAGCTGGCAATCCAATTGCCAGCTTAAGTCGAAACAAGG
3659081	+	2484.78	orphan		TCGTTGCCCGAATGCTGGCAGGAACTGTTGGCAGAACGGCAACATTTTTTTTGTCGTTGAC
3664938	-	58778.9	primary, antisense,	P:gene_id "EG12243"; gene_name "gadX";,A:gene_id "G0-8914"; gene_name "gadY";	TAGAGTTTTACTCAGACATAAAAAAAACCCGGCATAGGGGACCGGGAAGAGGATAGTCTGC
3664969	+	80064.3	primary, antisense,	P:gene_id "G0-8914"; gene_name "gadY";,A:gene_id "EG12243"; gene_name "gadX";	CTGGAGACGGCAGACTATCCTCTTCCCGGTCCCCTATGCCGGGTTTTTTTTATGTCTGAGT
3665220	-	23171.9	internal,	I:gene_id "EG12243"; gene_name "gadX";	GAAGAAGAGACATCATATTCACAGTTGCTTACTGAGTGTAGAATGCAACGTGCTTTGCAAC
3665532	-	27317	internal,	I:gene_id "EG12243"; gene_name "gadX";	AAAAAAGTTTCTTCATTACTCGTTCATCACTGTAGTAGAGATATTCCTGTTTTTCAGGAAG
3671519	+	1841.66	antisense,	A:gene_id "EG12246"; gene_name "yhjB";	TAACGATTTGAGATCTTTAATGTCCTTTTCCGGCGTCGTCCGCCAGTCTCCAGGCAGAAAC
3676288	+	753.393	antisense,	A:gene_id "EG12251"; gene_name "yhjG";	CAACAATCTAAATCTGTTTAATTGCCGGATGTCAGACATCCGGCAATTATCATCACTTCTT
3682149	+	956.073	antisense,	A:gene_id "EG20044"; gene_name "dctA";	AGGGGTCAATTATGCGCAAACACCCGCACTCGGGGAAGGGAGTGCGGGCATAAGTGATGAG
3696639	+	823.876	internal,	I:gene_id "EG12263"; gene_name "bcsE";	TCAAACAATTGCATCCCAGGCTGAAACCGCACACGTCGCGGTCATTAGCATGGACAGCGAT
3699668	+	2471.63	internal,	I:gene_id "EG12265"; gene_name "bcsG";	CCCGTTGGGGTGAAATTCTTCGGCATGAAGGCACCGCATCAGGGGGCACCGATTGTCATCG
3700201	+	10062.9	primary,	P:gene_id "G0-9042"; gene_name "rdlD";	TAGCCCCCGTGGTGTTGTCAGGTGCATACCTGCAACGTGCGGGGGTTTTCTCTCTCCAGCA
3705889	-	57365.1	orphan		CAATCTGTATACCCGGTGGCGCTGTGCCTCTGCGTGCAGCGCCATCCGGCAGCAATACTTC
3707800	-	92971.9	orphan		GATCCGCACTGTTACACTGATGTTAATTAGTACGGCATCCCCACCTCATAACGTTGACCCG
3708616	-	169619000	primary,	P:gene_id "EG30066"; gene_name "proK";	ACTTCGTTCGGGACGAAGGGGTCGGAGGTTCGAATCCTCTATCACCGACCAAATTCGAAAA
3710464	-	40693.1	internal,	I:gene_id "EG12267"; gene_name "eptB";	AGCAGGGTGTTATCACCTGTTTGTCCAGGGTTTGTTTGCATGAGATACATCAAATCGATTA
3717331	+	823.876	internal,	I:gene_id "EG12272"; gene_name "ghrB";	GATCGCCTTATCAGTGAATGGAGAGAAGCATGAAGCCGTCCGTTATCCTCTACAAAGCCTT
3719819	+	7040.22	orphan		ACTTTTATCCACTTTATTGCTGTTTACGGTCCTGATGACAGGACCGTTTTCCAACCGATTA
3720313	+	148358	orphan		CTCTGCTTAAAAGCACAGAATCTAAGATCCCTGCCATTTGGCGGGGATTTTTTTATTTGTT
3720444	+	3841.84	antisense,	A:gene_id "G0-9613"; gene_name "hokA";	ATGAGAATGCGCAACGCCGTAAGTAAGGCGGGAATAATTTCCCGCCGAAGACTCTTACTCT
3721992	-	282496	antisense,	A:gene_id "G0-10624"; gene_name "insJK";, gene_id "G7777"; gene_name "insK";	CGAGGCATATAGGTCTGATTCCGATATTCAATTGGAGTCAGACCTTTTAATTTCAGGCTAA
3722036	+	898.745	internal,	I:gene_id "G0-10624"; gene_name "insJK";, gene_id "G7777"; gene_name "insK";	CCTGAAATTAAAAGGTCTGACTCCAATTGAATATCGGAATCAGACCTATATGCCTCGTGTT
3725293	-	41257.7	internal,	I:gene_id "EG10409"; gene_name "glyQ";	CCACACGTATCCAGCACGAAATAATATGCAAAAGTTTGATACCAGGACCTTCCAGGGCTTG
3729386	-	32591.2	orphan		ACTGTGCAGTCCGTTGGCCCGGTTATCGGTAGCGATACCGGGCATTTTTTTAAGGAACGAT
3736826	-	43424.3	internal,	I:gene_id "EG11360"; gene_name "bax";	GGCTCATTTCAAAACAGTATCAGGGCCAATGGTCACCTGCTGAGCGTGCGCGTCTGAAAGA
3737011	-	250750	internal,	I:gene_id "EG11360"; gene_name "bax";	CTTAACTAAAGCTAGTAATAAACAGGTAAGCAGTAAACAAGAGTATTCTCGCAATAGTGCA
3741106	+	1987.02	antisense,	A:gene_id "EG12277"; gene_name "ysaA";	TCTGGCATAAACAAAGCGCACTGTTCCGGCGTTGAGAAACGCCGGAAAACGTTTCAAACAG
3767780	+	2678.7	internal,	I:gene_id "EG11766"; gene_name "yibJ";	GATTAATATCCCAGGCGTTTTCACAATCGGGGGGCATGGTACCCCCACATCTATTGAATCC
3775998	-	25150.3	antisense,	A:gene_id "EG11965"; gene_name "mtlR";	ACTGGAGTCTGCTGGTTCAAACTGTGGCGGCGGTGGTAACGCCGCCACGCAGTGCAGTTCA
3782582	-	75262.8	orphan		ACCTTTGTTACCGCTATGACCCGGCCCGCGCAGAACGGGCCGGTCATTATCTCATCGTGTG
3783603	-	27505.1	internal,	I:gene_id "EG20091"; gene_name "gpsA";	ACGTAATGCTTCAATGACTGTGATCGGTGCCGGCTCGTACGGCACCGCTCTTGCCATCACC
3786938	+	1030.94	internal,	I:gene_id "EG12297"; gene_name "envC";	CGCCAGCGTTCTTAGCGCTGGCGTATTGTTGTGCGCCTTTTCCGCCCACGCGGATGAGCGT
3792751	-	29483.6	orphan		TTTTGATACCAACTGAGATAGGAAAAATGATGCTTTGGCATCATTTTTTCTTTTTATATCA
3793815	+	889.975	orphan		GCTTCCGTTATTTATCATACATCGGAATATTGATACTAAAGCACTATTCACATGCAAAACC
3793960	+	749.009	orphan		GATTCGGATGTGATGGTATGATTACAGACATTCGTGTCTGAGATTGTCTCTGACTCCATAA
3795067	+	1277.8	internal,	I:gene_id "EG12210"; gene_name "waaF";	AGGCGATAATCGATGTGATGGCACCGGCATGGTGCCGTCCATTATTATCGCGGATGCCGGA
3798250	+	1044.1	primary, antisense,	P:gene_id "EG11424"; gene_name "waaL";,A:gene_id "EG11423"; gene_name "waaU";	TTAATTAAGAATAAACAAGTTTAAGAAGTGAGTTAAAACTCACTTCTTATCTATACAACTT
3808183	-	75074.5	orphan		GTAAGTGCGTTATCAGTATTCAGGTAGCTGTTGAGCCTGGGGCGGTAGCGTGCTTTTTTCT
3811202	-	316975	primary,	P:gene_id "EG10891"; gene_name "rpmG";	TAATTCTCGCTTTGATGTAACAAAAAACCTCGCTCCGGCGGGGTTTTTTGTTATCTGCTTG
3811709	-	179821	orphan		AACTGCGATGACCGGGCTGTAAAGCCTGACGAGGCGCCAATACCCCATACGAAGCTCGAGC
3821471	+	1445.07	internal,	I:gene_id "EG10965"; gene_name "gmk";	GATACTCATGGCTCAAGGCACGCTTTATATTGTTTCTGCCCCCAGTGGCGCGGGTAAATCC
3821636	+	947.307	internal,	I:gene_id "EG10965"; gene_name "gmk";	TTATTTCTTTGTTAATCATGATGAATTTAAAGAAATGATTAGCAGAGATGCGTTCCTCGAA
3822479	+	700.448	internal,	I:gene_id "EG10966"; gene_name "spoT";	GATTCAAACCTACCTGCCGGAAGACCAAATCAAGCGTCTGCGGCAGGCGTATCTCGTTGCA
3828999	+	1088.27	internal,	I:gene_id "EG11194"; gene_name "xanP";	CTGTTTCCACCCTCGAGTCAGAAAATGCGCAACCGGTTGCGCAGACTCAAAACAGCGAACT
3836316	+	5918115	primary,	P:gene_id "EG30092"; gene_name "selC";	TTGGGGCCGCCAGCGGTCCCGGGCAGGTTCGACTCCTGTGATCTTCCGCCAAAATGCCTCT
3852897	-	118311	internal,	I:gene_id "EG11275"; gene_name "ivbL";	GCCATCCGCCGCAGTGGTCGTCGTGCGTGTGGTGGTGGTCGTCGGCAATGCGCCGTAGGGA
3853116	-	354744	primary,	P:gene_id "G0-10201"; gene_name "istR-2";,gene_id "G0-10202"; gene_name "istR-1";	GTTACCAGCCGCAGGCGACTGACGAAACCTCGCTCCGGCGGGGTTTTTTGTTATCTGCAAT
3853441	+	1220.47	orphan		CTGAAACGGGTGGTGCCGTCAGCGCCTTAACCCCGCGTGAGCACACTGTGTTATGTCAACA
3866898	-	27317	orphan		GAATCTTCGGATTTGCAGGTACTTACTCGCTTCTTAGAAGGAGAAATGACTATGCGTAACT
3868543	+	1700.69	antisense,	A:gene_id "EG11713"; gene_name "yidR";	CGGGCAGGGTTGTTTCCGTTCCGCTTAACGGCGCATCACCTGCCGCTTTCCAGCCAGCTTC
3883796	-	38526.5	orphan		ATAACCGCAGACAGCGGTTCGTGCGTCACCCTCAAGCAGGGTCTTTTCGACGTACGTCAAC
3884541	+	83665.4	internal,	I:gene_id "EG10862"; gene_name "rnpA";	GAGTGGTTAAGCTCGCATTTCCCAGGGAGTTACGCTTGTTAACTCCCAGTCAATTCACATT
3886771	+	956.073	primary,	P:gene_id "EG11197"; gene_name "yidC";	GATTCGGTGAGTTTTCGCTAAAATAAGGGCGGTCAGTTGACCGCCTTTTTTCTTTTCGTAG
3904532	+	1577.27	antisense,	A:gene_id "EG10115"; gene_name "bglF";	TACCGCTGGTTCGGTGATACCAAACAGACTCGTCAACGCCGCTGATCCCGCCACCACTTTT
3913520	-	28730.8	internal,	I:gene_id "EG10382"; gene_name "glmS";	TCTGGCCGTTGTTGATGCAGAAGGTCATATGACCCGCCTGCGTCGCCTCGGTAAAGTCCAG
3917447	-	25338.5	internal,	I:gene_id "EG10104"; gene_name "atpG";	CTGATTAAAGAGCTGCAGTTGGTATACAACAAAGCTCGTCAGGCCAGCATTACTCAGGAAC
3918281	-	64805.8	primary,	P:gene_id "EG10098"; gene_name "atpA";	AACCCAATCCTGGTAACGTCTGGCGGCTTGCCTTAGGGCAGGCCGCAAGGCATTGAGGAGA
3919880	-	27505.1	internal,	I:gene_id "EG10105"; gene_name "atpH";	GGTCATTGATGGCAGCGTACGCGGTCGTCTTGAGCGCCTTGCAGACGTCTTGCAGTCTTAA
3920627	-	30236.4	internal,	I:gene_id "EG10103"; gene_name "atpF";	AAGCCCAGGTAATCATCGAGCAGGCGAACAAACGCCGCTCGCAGATTCTGGACGAAGCGAA
3920731	-	36171.7	internal,	I:gene_id "EG10103"; gene_name "atpF";	TCAAAAAGAAATTGCTGACGGCCTTGCTTCCGCAGAACGAGCACATAAGGACCTTGACCTT
3921120	-	28257.9	internal,	I:gene_id "EG10102"; gene_name "atpE";	ATCTGCTGTACATGGCTGCCGCTGTGATGATGGGTCTGGCGGCAATCGGTGCTGCGATCGG
3921293	-	43612.6	internal,	I:gene_id "EG10099"; gene_name "atpB";	CTGAATGTGCCGTGGGCCATTTTCCACATCCTGATCATTACGCTGCAAGCCTTCATCTTCA
3922387	-	86284.1	internal,	I:gene_id "EG10106"; gene_name "atpI";	TCTGTGTCGCTCGTGAGTCGAAACGTTGCTCGGAAGCTTCTGCTCGTTCAGTTACTGGTGG
3923737	+	1312.87	antisense,	A:gene_id "EG10375"; gene_name "mnmG";	TACCTGTTCTTGATGCGTTGCCTGGTAAGCGGGTGCTTACCAGGCATTTTTAATGCGTTAT
3927468	+	823.876	internal,	I:gene_id "EG10091"; gene_name "asnA";	GGGCGAAGGGCTGTACACGCACATGAAAGCCCTTCGCCCCGATGAAGACCGTCTTTCTCCG
3933399	+	2167.78	internal,	I:gene_id "EG10817"; gene_name "rbsD";	AAATGAAAAAAGGCACCGTTCTTAATTCTGATATTTCATCGGTGATCTCCCGTCTGGGACA
3933644	+	7163.98	internal,	I:gene_id "EG10817"; gene_name "rbsD";	GAAACGTTGCTCACTCACCTTGAGCAGCTGCAAAAACACCAGGGAAATACCATTGAAATTC
3937278	+	28585.1	orphan		TAATATAAAGAAAAGCAGGGCACGCGCCACCCTAACACGGTGGCGCATTTTATGGACATCC
3938325	+	753.393	internal,	I:gene_id "EG10819"; gene_name "rbsR";	ACAGTTTCTCACGTTATCAATAAAGATCGCTTCGTCAGTGAAGCGATTACCGCCAAAGTTG
3941692	+	211323	orphan		CTGAGAAAAAGCAAAGCGGCACTGCTCTTTAACAATTTATCAGACAATCTGTGTGGGCACT
3943487	+	1453.84	internal,	I:gene_id "EG30033"; gene_name "gltU";	CCCCTTCGTCTAGAGGCCCAGGACACCGCCCTTTCACGGCGGTAACAGGGGTTCGAATCCC
3947032	+	2568825	primary,	P:gene_id "EG30105"; gene_name "trpT";	ACCGGTCTCCAAAACCGGGTGTTGGGAGTTCGAGTCTCTCCGCCCCTGCCAGAAATCATCC
3948451	+	2669.93	primary, antisense,	P:gene_id "EG11450"; gene_name "yifE";,A:gene_id "EG11260"; gene_name "yifB";	GACTACACCGATTCTGACGATTAATAAAAAGGGCGAAATGCCCTTTTTTTATGTCAGTAGT
3950406	+	16203.4	internal,	I:gene_id "EG11270"; gene_name "ilvL";	TGATTAGCGTGGTGGTGATTATTATCCCACCGTGCGGGGCTGCACTTGGACGAGGAAAGGC
3959499	-	23171.9	primary,	P:gene_id "EG12352"; gene_name "ppiC";	GTGCTGTACCGCAACTAATAGCAAGGCCTTCTCCAGGAGAAGGCCTTGAGTGTTTTCTCCC
3959531	+	5802.21	antisense,	A:gene_id "EG12352"; gene_name "ppiC";	CAGGGAGAGGGAGAAAACACTCAAGGCCTTCTCCTGGAGAAGGCCTTGCTATTAGTTGCGG
3959909	-	63488.6	orphan		TTTTCTCCCCTTGAGGGACCTGCGAAGCCCGGATTTTCCGGGCTTTTGCCATATATGTACC
3965533	-	29671.8	internal,	I:gene_id "EG10844"; gene_name "rhlB";	GCATCCGAAGGTTGTAGAAGCCCTTGAAAAAAAAGGGTTTCATAACTGTACGCCCATTCAG
3965733	+	1246.77	orphan		ATAAAGTCAACCTTTAGTTGGTTAATGTTACACCAACAACGAAACCAACACGCCAGGCTTA
3966322	+	6300.31	internal,	I:gene_id "EG12428"; gene_name "rhoL";	TTGTCGTTTCAGTTCTGCGTACTCTCCTGTGACCAGGCAGCGAAAAGACATGAGTCGATGA
3967945	+	815.107	internal,	I:gene_id "EG10840"; gene_name "rfe";	TTTTCTCTGAGAGCATGCATTGTGAATTTACTGACAGTGAGTACTGATCTCATCAGTATTT
3970119	+	832.646	primary,	P:gene_id "EG11295"; gene_name "wzzE";	TCGAAATAGCAACACTGCTGCGGTGAGCGCAAAGGCGCTCGCCGCTTATTCGAAGAGAATC
3982585	+	35721750	primary,	P:gene_id "EG30042"; gene_name "hisR";	CCTGGATTGTGATTCCAGTTGTCGTGGGTTCGAATCCCATTAGCCACCCCATTATTAGAAG
3982811	+	3785405	primary,	P:gene_id "EG30068"; gene_name "proM";	AACTGGTTTGGGACCAGTGGGTCGGAGGTTCGAATCCTCTCTCGCCGACCAATTTTGAACC
3984899	-	42010.5	internal,	I:gene_id "EG10089"; gene_name "aslA";	TACCTCCGATAACGGACCGGAAGCCGAAGTACCGCCGCACGGACGCACCCCGTTCCGTGGT
3986582	+	313384	internal,	I:gene_id "G0-8873"; gene_name "glmZ";	CTTATGCCTCATCAGACACCATGGACACAACGTTGAGTGAAGCACCCACTTGTTGTCATAC
3986647	-	61886.6	primary, antisense,	P:gene_id "EG10434"; gene_name "hemY";,A:gene_id "G0-8873"; gene_name "glmZ";	CCGCCACAGTAGTTCCTTCTCACCCGGAGGCAAGCACCTCCGGGGCCTTCCTGATACATAA
3990701	-	27128.8	internal,	I:gene_id "EG10429"; gene_name "hemC";	TTAAGAATTGCCACACGCCAAAGCCCACTTGCACTCTGGCAGGCACACTATGTCAAAGACA
3991231	+	4022.59	internal,	I:gene_id "EG10170"; gene_name "cyaA";	AGAGACTGGATGCCATAAATCAATTGCGTGTGGATCGCGCGCTTGCTGCTATGGGGCCTGC
3991346	+	4890.31	internal,	I:gene_id "EG10170"; gene_name "cyaA";	AATGCCGGGTTACCTTGATGGTAACGTTCCCAAAGGCATTTGCCTTTACACGCCTGATGAA
3991466	+	762.161	internal,	I:gene_id "EG10170"; gene_name "cyaA";	GCCGAAAGGTGAGCTTCCAATTACTGGTGTATACACCATGGGCAGCACCTCGTCCGTAGGG
4000258	+	1026.56	antisense,	A:gene_id "EG11462"; gene_name "yigE";	TGCAACGTCATGTAGGCCGGATAGGGCGTTTACGCCGCATCCGGCATCTGCGCCATCTTCA
4001272	+	2163.06	internal,	I:gene_id "G0-10704"; gene_name " ";	ACACACCCAGTAGATACTGGCTCACTATCCTGTCATCCAGGATCAACTCCTAAGGCTATCC
4002383	-	45779.2	primary, antisense,	P:gene_id "EG11464"; gene_name "yigF";,A:gene_id "EG11463"; gene_name "corA";	ACCTGGAGCCTTTGAATAACAGGTGGCTTAGCCAGACTAAGCCACCGCTCTCGTTTTTTAC
4008928	-	24774	internal,	I:gene_id "EG11469"; gene_name "rhtB";	ATGACCACCTCGCTCAACCACGGTTATCGCGGCGCGGTGGCGTCTATTGCTGGGCTTCAGA
4009309	+	889.975	internal,	I:gene_id "EG10739"; gene_name "pldB";	TGATGAAGCAGAGTTTACTGGTGTGGATGACATTCCGGTGCGCTTTGTCCGTTTTCGCGCA
4012988	+	757.778	orphan		GCTGCGTTTCTCCACCCCGGTCACTTACTTCAGTAAGCTCCCGGGGATGAATAAACTTGCC
4015348	+	3515.72	primary, antisense,	P:gene_id "EG10584"; gene_name "metE";,A:gene_id "G7804"; gene_name "ysgA";	ACTTGCGTCGGGGGTAAAATCCAAACCGGGTGGTAATACCACCCGGTCTTTTCTCATTACA
4017234	+	762.161	primary,	P:gene_id "EG11045"; gene_name "udp";	CTGCTGTAATTCTCTTCTCCTGTCTGAAGGCCGACGCGTTCGGCCTTTTGTATTTTTGCGT
4022287	+	1846.05	internal,	I:gene_id "G7808"; gene_name "tatB";	GCGAACTGCTATTGGTGTTCATCATCGGCCTCGTCGTTCTGGGGCCGCAACGACTGCCTGT
4023541	+	1171.91	primary,	P:gene_id "EG11479"; gene_name "tatC";	AAGCGAAAAAACTGAAGAATAAATTCAACCGCCCGTCAGGGCGGTTGTCATATGGAGTACA
4024970	-	27317	antisense,	A:gene_id "EG11396"; gene_name "ubiD";	GTCGCGTAAATCGTTATATTTCATGGCGTCCATTGTAGCCTCTTAATCTGCGCCCATTATA
4027235	-	31838.4	antisense,	A:gene_id "EG10334"; gene_name "fre";	TGAATAACAGTTTAGTTGCCGTTCTTCCCGCCTGTCAGGGGCGGGTTTTTTTATATCTCAG
4037105	+	71425.4	primary,	P:gene_id "EG30084"; gene_name "rrsA";	GGTTGGATCACCTCCTTACCTTAAAGAAGCGTTCTTTGAAGTGCTCACACAGATTGTCTGA
4040636	+	1523810	primary,	P:gene_id "EG30070"; gene_name "rrfA";	CCGATGGTAGTGTGGGGTCTCCTCATGCGAGAGTAGGGAACTGCCAGGCATCAAATAAAAC
4042499	+	1392.12	internal,	I:gene_id "EG11831"; gene_name "rdoA";	ACCCGGATACCATCATGGACGCTCTGTTTGAGCATGGGATCCGGGTGGATTCCGGTCTTAC
4050006	+	1288980	internal,	I:gene_id "EG30098"; gene_name "spf";	TTTGGCTGAATATTTTAGCCGCCCCAGTCAGTAATGACTGGGGCGTTTTTTATTGGGCGAA
4051237	+	9498.68	internal,	I:gene_id "G0-8874"; gene_name "csrC";	CAGGGTGTGTTGGCGGCCTGCAAGGATTGTAAGACCCGTTAAGGGTTATGAGTCAGGAAAA
4053422	-	86472.1	antisense,	A:gene_id "EG11836"; gene_name "hemN";	GCACATTGATGGCGCTTTCGTTTTCTACTTTGTAAACGAAGCGCCATTCACTATTTAAATC
4053572	-	45026.4	orphan		GAGAAAGTCGTAGGCCTGATAAGACGCGACCAGCGCCGCATCAGGCATCATGCTCAGATGC
4056428	-	925952	orphan		CAACGTGAAGTTTGTCAGCTATCTGTAGCCCATCTCTGCATGGGCTTTTTTCTCCGTCAAT
4056541	-	45590.9	orphan		CTCTGGCAGGCCTGGGATCGGTGGCAAGCACATCACGCCGGATGCGACGCAAATGCGTCTT
4057783	-	42671.6	internal,	I:gene_id "EG10383"; gene_name "glnA";	CTGATGCCAGACGCATCCACCGCAGTGATTGACCCGTTCTTCGCCGACTCCACCCTGATTA
4057926	-	28730.8	internal,	I:gene_id "EG10383"; gene_name "glnA";	TGCGCTTCACCGATACTAAAGGTAAAGAACAGCACGTCACTATCCCTGCTCATCAGGTGAA
4058340	+	1625.83	orphan		AAGCGATCACAAAGGGACTCTGCAATACTTGTTTGCGGAGGATGTTTGTGATCCTGTTTTG
4085907	-	41445.9	orphan		TTCCTGGATGGAGGGAAATTGAGCCAATTCTGGACCTTTGCGGCCCCTTCCGCAAAGAAAA
4101512	+	951.689	orphan		GGCCGCATATCAGCTTAAAAAATGAACCATCGCCAACGGCGGTGGTTTTTTTGTGATCAAT
4106385	+	3313.05	orphan		CTTGCCATAGACACCATCCCTGTCTTCCCCCACATGCTGTGGGGGTTTTTTTTATCCTCAA
4107349	+	2321.89	internal,	I:gene_id "EG11873"; gene_name "fieF";	ATCGGATGTAATTATCCATCAGGACCCCTGTTCCGTCGTACCCAGGGAGGGTAAACGGTCT
4108722	+	4771.6	orphan		GACAAAGCGCACTTTGTCAGCAATATGAGGCGGATTTCTTCCGCCTTTTTAATCCCTCAAC
4110703	-	198848	primary, antisense,	P:gene_id "EG11015"; gene_name "tpiA";,A:gene_id "EG10138"; gene_name "cdh";	CTAAACAGGCTTAAGTCTGACAGGTGCCGGATTTCATATCCGGCACTTACTTTCCTTAACT
4112837	+	1171.91	orphan		CCGGGATTGTTATTTCCACGATGCAAATGACAATACCCGGAAAATCCTTCTGAACTCTTCA
4113600	-	63488.6	antisense,	A:gene_id "EG11877"; gene_name "uspD";	TCAAACGGTTGATAAATGAGTGATGATGACCACAGACAAGGAGGTCGCACTGCTCTTTTTG
4115641	-	24585.7	orphan		TATGCCGCATCCGGTAGTCCCGAAACGTGCGGGGGCAACCCCGCACACATCAATAATCCCT
4118217	-	27317	orphan		ACAATCAGATGGAATAAATGGCGCGATAACGCTCATTTTATGACGAGGCACACACATTTTA
4118843	+	26403.2	antisense,	A:gene_id "EG11879"; gene_name "rraA";	GTGTAGGCCAACAGGTAACGCAGAAAAAAGGCACCTTGCGGTGCCTTTCTTATCATTCAAT
4119080	-	23360.1	internal,	I:gene_id "EG11879"; gene_name "rraA";	TTCTGTTCGTCGCGCACTGGTCGATGCTGAACTGGCGCGTCTGGCAGTACAAAATGAATGG
4126996	+	20416.8	orphan		TTTAACATCGCGTGGTGTCTGGCGTTAGGGCTGGAAGAGCGACGCGGCCTTAAACCGAGGT
4127267	+	1154.37	primary, antisense,	P:gene_id "EG10889"; gene_name "rpmE";,A:gene_id "EG11882"; gene_name "yiiX";	AGCAAATAAGACCGGATTTCCGAAAAAAGCGCCGCACGGCGCTTTTTTTGTGCCTGAATTT
4128474	-	26940.5	orphan		CACGCCGACAGGTGCATTACACGATGTCACGGTAACGCCTGTACGGTAAACTATGCGGGTT
4128666	+	2207.24	orphan		CAATGTTTACTCTGGTGCCTGACATTTCACCGACAAAGCCCAGGGAACTTCATCACATGAC
4148365	-	34193.2	orphan		AATGTTTACATCGAACTCCCCTCAGGCCACACTTTTCAGGTGGCCTTTTTTAATAATGCCA
4153127	-	64241.3	orphan		AAAGCCCGAGCATATTCGCGCCAATGCGACGTGAAGGATACAGGGCTATCAAACGATAAGA
4153343	-	36924.4	orphan		GCCGCAATAATGTCGGATGCGATACTTGCGCATCTTATCCGACCTACACCTTTGGTGTTAC
4153610	+	1282.18	orphan		TCCGGCCTACGGTTGGGCATCGTTTGAGTCACTGTAGGTCGGATAAGATGCGCAAGCATCG
4158280	-	47193	primary,	P:gene_id "EG31116"; gene_name "oxyS";	AATAACTAAAGCCAACGTGAACTTTTGCGGATCTCCAGGATCCGCTTTTTTTTGCCATAAA
4163564	+	757.778	orphan		TCTCTTAGTATCTTAGATACCCCTCCAAGCCCGAAGACCTGCCGGCCAACGTCGCATCTGG
4168233	+	82293.4	primary,	P:gene_id "EG30085"; gene_name "rrsB";	GGTTGGATCACCTCCTTACCTTAAAGAAGCGTACTTTGTAGTGCTCACACAGATTGTCTGA
4168339	+	1942.84	orphan		AGAGAATAAGGCCGTTCGCTTTCTATTAATGAAAGCTCACCCTACACGAAAATATCACGCA
4168633	+	20791.5	orphan		AGTCTCTCAAATTTTCGCAACACGATGATGAATCGAAAGAAACATCTTCGGGTTGTGAGGT
4171799	+	2260.18	primary,	P:gene_id "EG30071"; gene_name "rrfB";	CCAGGCATCAAATAAAACGAAAGGCTCAGTCGAAAGACTGGGCCTTTCGTTTTATCTGTTG
4174046	-	29483.6	primary, antisense,	P:gene_id "EG10922"; gene_name "coaA";,A:gene_id "EG10123"; gene_name "birA";	GAGGTCAGACTACGCAAATAATTTGCAGGGGAGCGAATACTCCCCTTTCTTATTTTTCTGC
4175463	+	47650000	primary,	P:gene_id "EG30102"; gene_name "thrU";	AACTGACTTGTAATCAGTAGGTCACCAGTTCGATTCCGGTAGTCGGCACCATCAAGTCCGG
4175747	+	24436250	primary,	P:gene_id "EG30036"; gene_name "glyT";	CCTCAGCCTTCCAAGCTGATGATGCGGGTTCGATTCCCGCTGCCCGCTCCAAGATGTGCTG
4176017	+	1912.14	internal,	I:gene_id "EG11037"; gene_name "tufB";	TACAAAACCGCACGTTAACGTCGGTACTATCGGCCACGTTGACCATGGTAAAACAACGCTG
4177245	+	10983.6	orphan		CGTACCAGAACCTGGCTCATCAGTGATTTTCTTTGTCATAATCATTGCTGAGACAGGCTCT
4178362	+	2740.41	orphan		TTTAATCGTTGCACAAGGCGTGAGATTGGAATACAATTTCGCGCCTTTTGTTTTTATGGGC
4179776	+	11248.3	orphan		GCGAATGAAGGAAGCCAACGCCGTCACAAGCTGAATAGCGACGGATAGAAAAGATTTGTTC
4180511	+	753.393	primary,	P:gene_id "EG10871"; gene_name "rplJ";	GCTGCTGTACGCGATGCGAAAGAAGCTGCTTAATCGCAGTTATCTTTTTAACGCATTCGCT
4180995	+	23672.2	orphan		GCCTGAGAAATCAGGCTGATGGCTGGTGACTTTTTAGTCACCAGCCTTTTTGCGCTGTAAG
4183172	+	1854.82	internal,	I:gene_id "EG10894"; gene_name "rpoB";	AGGCCACTTCGTAGAAGACCTGGTAACTTGCCGTAGCAAAGGCGAATCCAGCTTGTTCAGC
4190323	-	576295	primary, antisense,	P:gene_id "G0-9388"; gene_name "sroH";,A:gene_id "EG11429"; gene_name "yjaZ";	AATACCAGAGATAATTCTCTGGCGAAACCCACCTTAAGGTGGGTTTTGTTATTTTGAGGGC
4190584	-	74886.4	orphan		AGGAATGTTGTCCAGGGCGAAAAGCTTCTTCCTCGTTTCGCCCTGCCTTTCTTAAAAATTC
4196185	-	1995280	orphan		GATCCGCGGAACCTGATCAGGCTAATACCTGCGAAGGGAACAAGAGTTAATCTGCTATCGC
4200253	+	1229.24	orphan		TATGCAGGAGAGTGCTATTCTGGCATTTCCGTCGCACTCGATGCTTAGCAAGCGATAAACA
4200389	+	1440.69	internal,	I:gene_id "EG10466"; gene_name "hupA";	AGGCTAAAGCTGCTCTGGAGTCCACTCTGGCTGCAATTACTGAGTCTCTGAAAGAAGGCGA
4200605	+	14561	internal,	I:gene_id "EG11917"; gene_name "yjaH";	ATTGCGTGGCAGTGAACAGTTTTAACGAAGGGGTGGTTTCACCCCTTTTGTCTTTCTGGCG
4208031	+	44997.2	orphan		GTGCGCTAAAGCGCGTCGCAACTGCTCTTTAACAATTTATCAGACAATCTGTGTGGGCACT
4210035	+	82390.6	orphan		AGTCTCTCAAATTTTCGCAACACGATGATGAATCGTAAGAAACATCTTCGGGTTGTGAGGT
4215275	+	3110.36	orphan		GATCGTTAAGCGATTCAGCACCTTACCTCAGGCACCTTCGGGTGCCTTTTTTATTTCCGAA
4215503	+	1652.14	internal,	I:gene_id "EG10023"; gene_name "aceB";	CGGATCCATGACGAGGAGCTGCACGATGACTGAACAGGCAACAACAACCGATGAACTGGCT
4215677	+	1846.05	internal,	I:gene_id "EG10023"; gene_name "aceB";	GCGCATTCAGCAGCAGCAAGATATTGATAACGGAACGTTGCCTGATTTTATTTCGGAAACA
4218963	+	36007.4	internal,	I:gene_id "EG10026"; gene_name "aceK";	GTACTGTCGGTTATTTGACCACCGCTCGCTTACTCCCGAGCGGCTTTTTATCTTTAGCTCT
4223556	-	31650.2	internal,	I:gene_id "EG10491"; gene_name "iclR";	AACGCGGCAGAAAACCCGCCGTTGCCACCGCACCAGCGACTGGACAGGTTCAGTCTTTAAC
4227570	+	766.548	orphan		TCTGTCACTTTTCCTTACAACAAACAGGGCGCTCAATGAGTGCCCTGTCTCTTTATTAATA
4233402	-	129332	orphan		GGTGCATCGCCGAGGTGATTGAACGGCTGGCCACGTTCATCATCGGCTACAGGGGCTGAAT
4235595	+	1163.14	orphan		CGATTGATTAAATAACCTTAATAACAATGCCGACGTTATGTCGGCATTTTTTTATCAGATA
4250532	+	1374.59	orphan		CCACAGTGCTGATTTTGCAACAACTGGTGCGTCTCCTGGCGCACCTTTTTTTATGCTTCCT
4253924	+	740.24	primary,	P:gene_id "EG11370"; gene_name "ubiA";	TACTGGCATTTCTGATGATGTAAAAAAGCCGGATGATCATCCGGCTTTCTTCTGGGTTGCC
4257118	+	744.624	internal,	I:gene_id "EG10533"; gene_name "lexA";	TGCTGTATATACTCACAGCATAACTGTATATACACCCAGGGGGCGGAATGAAAGCGTTAAC
4257239	+	1304.11	internal,	I:gene_id "EG10533"; gene_name "lexA";	GCCGACGCGTGCGGAAATCGCGCAGCGTTTGGGGTTCCGTTCCCCAAACGCGGCTGAAGAA
4259486	+	1167.53	primary, antisense,	P:gene_id "EG11928"; gene_name "yjbJ";,A:gene_id "EG11929"; gene_name "zur";	ATCGCTGGTAATTAATCCCTCCTGCCCGACGTGTACAAGGATGTACGCCCTCTTAACGCGG
4259941	-	36924.4	internal,	I:gene_id "EG11929"; gene_name "zur";	ACAACGCAGGAGTTATTAGCGCAGGCTGAAAAAATCTGCGCGCAGCGTAATGTGCGCCTGA
4263199	+	1511.17	antisense,	A:gene_id "EG11492"; gene_name "qor";	TCTGTCACTATTGCGCCTCTAACAGATTCATCGTGCTGTACCCTACATACAGCCGAACTAT
4273842	-	55859.6	internal,	I:gene_id "EG11061"; gene_name "uvrA";	CGTTTAATCCGGGAAAGGTGAATGGATAAGATCGAAGTTCGGGGCGCCCGCACCCATAATC
4274126	+	832.646	internal,	I:gene_id "EG10976"; gene_name "ssb";	ATCGCGCGTTTACACTTATTCAGAACGATTTTTTTCAGGAGACACGAACATGGCCAGCAGA
4274757	+	2546.49	antisense,	A:gene_id "EG11937"; gene_name "yjcB";	AAAGCATCTGCCAGCCATAAAAAAGAAGCCTCCGTTATGGAGGCTTCTACGTATCAGGTCA
4330351	+	11398	orphan		ACACTGGTAGGGTAAAAAGGTCATTAACTGCCCAATTCAGGCGTCAACTGGTTTGATTGTA
4351571	-	54069.3	internal,	I:gene_id "G7827"; gene_name "dcuS";	GATGAAATTGAGTACCACAGTGATCTTAATGGTCAGTGCGGTACTGTTCTCGGTGCTATTG
4352488	+	1026.56	orphan		CAAAGAATGGGCAGAGAGCGCGTTTTTTTGTCCCAAGTCATCCCCTTTACTGAGCAAAAAA
4362549	-	2883950	primary,	P:gene_id "EG30064"; gene_name "pheU";	GGGATTGAAAATCCCCGTGTCCTTGGTTCGATTCCGAGTCCGGGCACCAAATTCATATAAA
4365438	-	30612.8	primary,	P:gene_id "EG11225"; gene_name "dcuA";	GTAGCTTCATGCTGTAATGATCAATCGCGGGGCGTTCACGCCCCGCTTTCTTTCCCGCCGA
4367012	-	31273.8	internal,	I:gene_id "EG10095"; gene_name "aspA";	CAACGGTGACATCGTGGGTAAAATCTGTGCCGAAACCGGTAAGAGTGTACGTGAAGTCGTT
4373349	+	828.26	antisense,	A:gene_id "G7835"; gene_name "yjeJ";	ACCAACGATCACGTTATCAGTCATTTCAGGCTGGATGGCTCCAGCCTCGCATTAGCAAAGA
4376301	+	9287.23	primary,	P:gene_id "EG12099"; gene_name "efp";	TCTCGCGTGAAGTAATGCGGTTGTGGTGCGGCCTGCAGGCTGCACCATCACTTATTCAGGT
4376735	+	96648.8	primary,	P:gene_id "G0-9562"; gene_name "ecnB";	AAAGCGCAGCAATAAGCAATAACGGTACGACAGCTGTGTCGTGCCGTTTGTTTTTTCTGCG
4378960	-	224659	primary,	P:gene_id "EG10333"; gene_name "frdD";	CTAACGCATCGCCAATGTAAATCCGGCCCGCCTATGGCGGGCCGTTTTGTATGGAAACCAG
4392465	+	9159.76	primary,	P:gene_id "EG30038"; gene_name "glyV";	CGAGTCTCGTTTCCCGCTCCAAAATTTGAAAAGTGCTGCAAAGCACAGACCACCCAAGCGG
4397187	+	3480.64	internal,	I:gene_id "EG11363"; gene_name "amiB";	TACATAAACGTCGACCAGAACACGCCAGCCTTGGCGTTCTGCGCTCGCCGGATATCCCATC
4399885	+	4097.46	internal,	I:gene_id "EG10595"; gene_name "miaA";	ATCAGGTGCATCAGTTCGCCATCGCCCCGGCGAGCCGTGAACTGCTCCATCAACGCATTGA
4400333	+	815.107	internal,	I:gene_id "EG10438"; gene_name "hfq";	AGAGAATGGCTAAGGGGCAATCTTTACAAGATCCGTTCCTGAACGCACTGCGTCGGGAACG
4400650	+	5229.57	orphan		TTCGGGCTGTTTTTTTACACGGGGAGCCAGCGATCCTGCGTTCCCCGCTGATCTATTTAGA
4404366	+	1075.12	orphan		CGGTACAGGTCAATAAAGCCACCGCATCCTCAGGGATGTCGGTGGTTTTCTTTTTCTATAA
4406146	+	819.491	orphan		CTTCCCCGAACTGAAATAAATTAGCGACACAGCTTGTGGCTGGTTTATCATCAATATAAAT
4425118	+	41428.2	internal,	I:gene_id "EG10905"; gene_name "rpsF";	GATTCGGCTGACCCAGACAGGAGGCTGAATAATCCGTAAGGAGCAATTCGATGCGTCATTA
4425548	+	964.843	primary, internal,	P:gene_id "EG10905"; gene_name "rpsF";,I:gene_id "EG10764"; gene_name "priB";	GGATTCTGAAGAGTAATTTCTGATGACCAACCGTCTGGTGTTGTCCGGCACCGTGTGCAGG
4425632	-	38150.1	antisense,	A:gene_id "EG10764"; gene_name "priB";	TAACAATAACGGGCATTTGACACCACGCCTGCCGGTGAAAGCCGGCTTCCTCCTGCACAGA
4426607	+	4026.97	primary, antisense,	P:gene_id "EG10870"; gene_name "rplI";,A:gene_id "G7862"; gene_name "yjfZ";	ATTCGTTATTCAACGAGACGTAAAAACGCCGACCATTGGTCGGCGTTTTGCTTTCTATTTT
4428652	-	25150.3	internal,	I:gene_id "G7864"; gene_name "ytfB";	GAACTAAAACCAACCCTGGAGAAAGTCTGGCACGCGCCGGACAATTTTCGCTTCATGGACC
4439860	+	14420	antisense,	A:gene_id "G7873"; gene_name "ytfL";	TAAAAAGTGCTATGCAGTAATAAGACGGCTCCTGATTCAGGAGCCGTTGATGTTTCTGGGG
4441217	-	36736.2	primary,	P:gene_id "G0-10706"; gene_name " ";	AAATTAATCAACTTCCCCTTCCGAGGATCTGGCCTGAAAGGTCGGATAAGATATGTTAAAC
4447494	+	885.59	internal,	I:gene_id "G7875"; gene_name "tamB";	AGAAGACGACGTAATCGCCGGAGTTCGCGTCACTGGTCTGGCGGACGAACCGAAAGCGGAG
4447871	+	1039.71	internal,	I:gene_id "G7875"; gene_name "tamB";	CTAAGCTATATCTGGAAGCCGTGTCTGGTGTAGACCAGGCACTGGATTTGCTCTATCAGTT
4449069	-	43612.6	antisense,	A:gene_id "EG12096"; gene_name "chpB";	TCTTCTGGCGTAATAACCCTGAACGCCGGGCTTCGGTTAGTAAGGGTTTTTTTATGCCCGC
4467490	+	7758.21	primary,	P:gene_id "G0-10689"; gene_name "mgtL";	GATCCCACGCCTCTCCCTCGACGGAGATTAAAACTTTTCCGGTAAGCCCGTCTTTTCACGG
4470376	-	25526.7	orphan		TTTATTGAATTTGTTGGCCGGATAAGGCATTTACGCCGCATCCGGCATGAACAAAACTCAC
4470490	-	27693.3	primary,	P:gene_id "G7877"; gene_name "ridA";	CTGTTCGTCGCTAATCTTGATGGAAATCCGGGCTATCATGCCCGGATTAAGTCTGATGACA
4472452	-	43047.9	internal,	I:gene_id "EG11279"; gene_name "pyrL";	CGCGTCTGAAAAAAGACGCTGGCCTGCCGTTTTTCTTCCCGTTGATCACCCATTCCCAGCC
4486156	+	2881.38	orphan		TGAGTATAATTATCTTAGCGACGATTTCGACGACTCAAGAGAATAAATGACGTTTAAGCCA
4496489	+	85200900	primary,	P:gene_id "EG30053"; gene_name "leuX";	CAAAATCAACCGTAGAAATACGTGCCGGTTCGAGTCCGGCCTTCGGCACCAAAAGTATGTA
4497967	+	969.23	primary,	P:gene_id "EG12364"; gene_name "intB";	ATTAATAATCCATTAAAACAGTAATCATCCCGGGCAAATGCCCGGGAATTATTCTAGGATT
4499867	-	51902.7	antisense,	A:gene_id "G7896"; gene_name "yjgW";	GCTTTACTTTTCTGGCCTTGGGCTGTCGGTCAGCGACAGTGCCAATCCTGTTCATCATTAT
4500443	-	67633.6	orphan		GAGTGTGCGCAGGGATTATATGTCAGTGTATGACTATCCCGTACCAACCACACCGTGGCTG
4502006	+	956.073	orphan		GGGCATGACAATGTCAAACAGTCAAAGATTGTGGCGTTGACGGTCAGTCTTGGGGACAAAA
4502126	+	2533.34	antisense,	A:gene_id "G7900"; gene_name "insG";	GCATCTTGGTTCTGTAATGCCAGTCAGTTAAGCAACTGACTGGCTCTTTTTCGGGGCTGTG
4518148	-	160230	internal,	I:gene_id "EG10291"; gene_name "fecI";	TCGAGTCGCTTTATGGCACACATCACGGCTGGTTGAAAAGCTGGCTGACGCGCAAACTCCA
4528112	+	557258	primary, antisense,	P:gene_id "G0-10609"; gene_name "ryjB";,A:gene_id "G7915"; gene_name "sgcQ";	GAAGGGTTATTGCTCTTTGCCGGGGATAAGCGCTCTGCTTATCCCCATCTTATCGGCGTAT
4540846	+	2044.35	orphan		TTAACAGTTGCTACTCCATTTAAGTTCACTCAGAAGAACTGGTCCACTTACGTTAGTTATT
4541591	+	2533.34	primary,	P:gene_id "EG10309"; gene_name "fimB";	GCGTCACGCTGTTTTATAGAGATAGTTGAGATACCAGGGATGGTGTTAAAAACTACATTAT
4541957	+	1819.74	orphan		TTAATGTAATTGACTGATAGCCACATCACTCCGTGTGTGGTTATCTTTTTATCTATTGGGC
4543708	+	67932.1	primary,	P:gene_id "EG10308"; gene_name "fimA";	CAATAACCTACCCAGGTTCAGGGACGTCATTACGGGCAGGGATGCCCACCCTTGTGCGATA
4546083	+	828.26	internal,	I:gene_id "EG10311"; gene_name "fimD";	TTAAACAAAATGGGTATGACATTTATAATAGTACGGTGCCACCGGGGCCTTTTACCATCAA
4579912	+	160899	primary,	P:gene_id "G0-10610"; gene_name "symR";	GTGATTGTGATTAGCGATGCGGGTGTGTTGGCGCACATCCGCACCGCGCTAAATACCTGTA
4604742	-	87413.4	antisense,	A:gene_id "G7948"; gene_name "bglJ";	TAACAGAATATCTGCGGCCTCCAACAACCCTGCGTCAGAACTGACGCCCAGTTTCGACATC
4605576	-	118499	internal,	I:gene_id "G7949"; gene_name "fhuF";	TCTGGCGAACGCATCTCCAGCCGCAGGATCCCACGCTTGCGCAAGCCGTGCGGGCGACGAT
4605858	+	3238.18	internal,	I:gene_id "G0-10474"; gene_name "yjjZ";	TGCAACGTACGCTGGGCAGTGGCTGGGGAGTGTTGCTGCCGGGATTGCTGATTGCAGGGCT
4606076	-	682262	primary, antisense,	P:gene_id "EG30051"; gene_name "leuV";,A:gene_id "G0-10474"; gene_name "yjjZ";	GTTAGTGTCCTTACGGACGTGGGGGTTCAAGTCCCCCCCCTCGCACCAATTATCTTTACTT
4606193	+	17293.2	antisense,	A:gene_id "EG30051"; gene_name "leuV";, gene_id "EG30047"; gene_name "leuP";	TCTACCAATTCCGCCACCTTCGCACAGTCATCTTACTTTTTTTGATATCGCCTCGTTTGGT
4606200	-	607998000	primary,	P:gene_id "EG30047"; gene_name "leuP";	GGTGTTAGTGTTCTTACGGACGTGGGGGTTCAAGTCCCCCCCCTCGCACCAAACGAGGCGA
4606792	+	1652.14	antisense,	A:gene_id "G7950"; gene_name "rsmC";	TGGAAGCCAAATGTCTCATCCAGCACGTCCGGATAAGGCAGGAAGGCGTTCGCTACAATTC
4611232	+	2123.59	orphan		CGTTCAATGCGTAGATATCAGTATCTAAAGCCGTCGATTGTCATTCTACCGATATTAATAA
4612043	+	1171.91	primary,	P:gene_id "EG11391"; gene_name "osmY";	ACTAAGTAATTCGTCGTAATTCGTCCTCCCGAACTTTGTCGGGAGGCGCGATGTGCACCAC
4612345	+	1378.97	orphan		AGACCATTAAGAAAATTTTATCCAAAGCCAGTCCAGCGGACTGGCTTTTGCGGTTTTAGCG
4635102	-	81198	internal,	I:gene_id "EG11366"; gene_name "rob";	TATTCGTGCTCGTCGTTTGTCGAAATCGGCGGTCGCACTACGCCTGACTGCGCGTCCGATT
4640415	-	45026.4	antisense,	A:gene_id "G7954"; gene_name "yjjY";	AGCTAATGATGTTGTTGACGTTGATGGAAAGTGCATCAAGAACGCAATTACGTACTTTAGT
